# Supplementary material for: Identifying In Vitro Cultured Human Hepatocytes Markers with Machine Learning Methods Based on Single-Cell RNA-Seq Data
Source: Front Bioeng Biotechnol. 2022 May 30;10:916309. doi: 10.3389/fbioe.2022.916309 (PMC9189284; doi:10.3389/fbioe.2022.916309)
Supplement: Supplementary file 1 [file Table2.XLSX]

## Sheet: Decision tree
Number of features	5C-condition cultured human primary hepatocyte	Cultured human primary intrahepatic biliary epithelial cell	Definitive endoderm	Endoderm stem cell (EnSC)	EnSC-derived cholangiocyte	EnSC-derived EGFi-untreated hepatocyte	EnSC-derived hepatic endoderm	EnSC-derived hepatoblast	EnSC-derived hepatocyte	EnSC-derived immature hepatocyte	EnSC-derived TPPB-untreated cholangiocyte	Hepatocyte derived from ProliHH P2 through 3D maturation	Hepatocyte derived from ProliHH P5 through 3D maturation	Human embryonic stem cell-derived hepatocyte-like cell	Sorted ALB+ CYP3A4+ EnSC-derived hepatocyte	Uncultured adult human primary hepatocyte	ACC	MCC
1	0.458333	0.264706	0.8	0.25	0.264706	0.140625	0.355932	0.154762	0.079096	0.258065	0.226667	0.454545	0.375	0.192857	0.238806	0.768421	0.277245	0.228426
2	0.822917	0.764706	0.8	0.666667	0.5	0.320312	0.644068	0.309524	0.259887	0.516129	0.493333	0.590909	0.71875	0.214286	0.567164	0.926316	0.490846	0.45196
3	0.8125	0.647059	0.733333	1	0.485294	0.304688	0.542373	0.333333	0.254237	0.677419	0.546667	0.590909	0.71875	0.292857	0.552239	0.968421	0.505667	0.46453
4	0.885417	0.852941	0.8	1	0.602941	0.328125	0.610169	0.5	0.389831	0.580645	0.493333	0.772727	0.65625	0.55	0.761194	0.989474	0.605929	0.573267
5	0.895833	0.852941	0.8	1	0.661765	0.4375	0.728814	0.535714	0.39548	0.677419	0.44	0.818182	0.8125	0.771429	0.820896	0.957895	0.664342	0.635832
6	0.90625	0.941176	0.866667	0.916667	0.602941	0.4375	0.762712	0.47619	0.474576	0.516129	0.48	0.954545	0.8125	0.742857	0.791045	0.926316	0.666085	0.636281
7	0.916667	0.941176	0.8	0.916667	0.529412	0.40625	0.779661	0.571429	0.457627	0.709677	0.466667	0.909091	0.96875	0.842857	0.985075	0.947368	0.6966	0.669909
8	0.895833	0.941176	0.733333	0.958333	0.617647	0.429688	0.779661	0.464286	0.491525	0.677419	0.56	0.863636	0.96875	0.842857	0.985075	0.968421	0.70619	0.679546
9	0.927083	0.941176	0.866667	0.916667	0.588235	0.398438	0.711864	0.595238	0.463277	0.645161	0.453333	0.863636	0.96875	0.821429	0.955224	0.968421	0.693984	0.666574
10	0.895833	0.970588	0.866667	0.958333	0.514706	0.421875	0.813559	0.488095	0.468927	0.419355	0.493333	0.818182	1	0.857143	0.955224	0.978947	0.691369	0.663
11	0.9375	0.941176	0.933333	0.875	0.602941	0.460938	0.813559	0.595238	0.480226	0.645161	0.64	0.818182	1	0.857143	0.940299	0.968421	0.726242	0.701234
12	0.916667	0.941176	0.866667	0.875	0.735294	0.515625	0.779661	0.642857	0.457627	0.677419	0.68	0.909091	0.96875	0.885714	0.955224	0.978947	0.745423	0.723049
13	0.979167	0.941176	1	0.958333	0.514706	0.546875	0.830508	0.535714	0.446328	0.677419	0.693333	0.909091	0.9375	0.835714	0.970149	0.989474	0.733217	0.709768
14	0.927083	0.970588	0.933333	0.875	0.573529	0.539062	0.762712	0.654762	0.446328	0.774194	0.586667	0.954545	0.96875	0.842857	0.940299	0.989474	0.731473	0.708584
15	0.927083	0.970588	0.933333	0.916667	0.558824	0.523438	0.79661	0.642857	0.570621	0.741935	0.6	0.909091	0.96875	0.864286	0.940299	0.947368	0.748038	0.725001
16	0.958333	0.970588	0.933333	0.916667	0.647059	0.546875	0.847458	0.642857	0.542373	0.774194	0.586667	0.909091	0.96875	0.85	0.955224	0.968421	0.757629	0.735998
17	0.927083	0.970588	0.8	1	0.632353	0.546875	0.779661	0.607143	0.581921	0.806452	0.586667	0.954545	1	0.814286	0.970149	0.957895	0.752398	0.729498
18	0.90625	0.970588	1	0.958333	0.676471	0.609375	0.915254	0.702381	0.564972	0.677419	0.56	0.909091	1	0.871429	0.940299	0.957895	0.77245	0.751636
19	0.958333	0.911765	1	0.916667	0.602941	0.625	0.847458	0.738095	0.610169	0.677419	0.6	0.818182	0.96875	0.857143	0.985075	0.968421	0.779425	0.759476
20	0.916667	1	1	0.916667	0.617647	0.679688	0.898305	0.702381	0.644068	0.580645	0.573333	1	0.96875	0.864286	0.955224	0.947368	0.787271	0.767461
21	0.885417	0.911765	1	0.958333	0.676471	0.664062	0.830508	0.690476	0.564972	0.709677	0.573333	0.909091	1	0.857143	0.955224	0.968421	0.771578	0.750823
22	0.9375	0.882353	1	0.958333	0.602941	0.632812	0.864407	0.702381	0.655367	0.83871	0.64	1	0.9375	0.85	0.940299	0.989474	0.79163	0.772229
23	0.90625	0.911765	1	0.916667	0.573529	0.640625	0.915254	0.738095	0.570621	0.806452	0.586667	0.954545	0.9375	0.835714	0.940299	0.978947	0.77245	0.752043
24	0.9375	0.970588	0.933333	0.916667	0.676471	0.742188	0.830508	0.714286	0.621469	0.677419	0.6	0.909091	0.96875	0.857143	0.925373	0.968421	0.793374	0.774321
25	0.947917	0.941176	0.933333	0.916667	0.632353	0.65625	0.847458	0.77381	0.615819	0.870968	0.613333	0.954545	0.96875	0.857143	0.955224	0.957895	0.793374	0.774814
26	0.958333	0.941176	0.933333	0.958333	0.691176	0.65625	0.813559	0.785714	0.59322	0.709677	0.653333	0.909091	0.96875	0.871429	0.940299	0.989474	0.795118	0.776416
27	0.927083	0.941176	1	0.958333	0.632353	0.78125	0.830508	0.761905	0.615819	0.741935	0.533333	0.954545	0.9375	0.842857	0.955224	1	0.797733	0.779382
28	0.96875	0.970588	0.933333	0.916667	0.661765	0.609375	0.864407	0.72619	0.632768	0.741935	0.64	0.954545	1	0.835714	0.970149	0.989474	0.792502	0.773399
29	0.885417	0.911765	1	0.875	0.676471	0.757812	0.79661	0.690476	0.621469	0.806452	0.493333	0.909091	0.9375	0.828571	0.970149	0.978947	0.781168	0.761138
30	0.916667	1	1	0.875	0.676471	0.65625	0.864407	0.75	0.644068	0.774194	0.666667	0.954545	1	0.871429	0.955224	0.989474	0.804708	0.786709
31	0.96875	1	1	0.916667	0.705882	0.703125	0.79661	0.761905	0.666667	0.774194	0.613333	0.909091	1	0.842857	0.955224	0.968421	0.808195	0.790598
32	0.947917	0.941176	1	1	0.573529	0.679688	0.881356	0.75	0.694915	0.774194	0.666667	0.909091	1	0.871429	0.955224	0.978947	0.811683	0.793843
33	0.958333	0.970588	1	0.916667	0.676471	0.671875	0.830508	0.75	0.638418	0.903226	0.573333	0.909091	0.96875	0.85	0.940299	1	0.800349	0.781844
34	0.916667	0.911765	1	1	0.647059	0.6875	0.898305	0.75	0.60452	0.870968	0.68	0.954545	1	0.878571	0.940299	0.968421	0.803836	0.7858
35	0.895833	1	0.866667	0.875	0.705882	0.703125	0.847458	0.75	0.615819	0.741935	0.746667	0.954545	0.96875	0.835714	0.940299	0.968421	0.799477	0.781424
36	0.9375	0.941176	0.933333	0.958333	0.558824	0.664062	0.915254	0.797619	0.638418	0.806452	0.706667	0.954545	1	0.85	0.955224	0.978947	0.804708	0.786856
37	0.947917	0.970588	0.933333	0.916667	0.617647	0.679688	0.864407	0.869048	0.661017	0.870968	0.546667	0.909091	1	0.857143	0.955224	0.957895	0.806452	0.788495
38	0.96875	0.941176	1	0.875	0.691176	0.71875	0.830508	0.785714	0.632768	0.774194	0.64	0.954545	1	0.864286	0.970149	0.978947	0.811683	0.794298
39	0.927083	1	1	0.916667	0.617647	0.734375	0.881356	0.833333	0.621469	0.903226	0.613333	0.954545	1	0.85	0.955224	0.989474	0.812554	0.795596
40	0.9375	0.970588	0.933333	0.833333	0.544118	0.742188	0.864407	0.666667	0.621469	0.806452	0.573333	0.954545	0.96875	0.857143	0.940299	0.989474	0.787271	0.767356
41	0.9375	0.970588	1	0.916667	0.588235	0.710938	0.779661	0.833333	0.661017	0.83871	0.586667	0.954545	0.96875	0.821429	0.955224	0.989474	0.801221	0.782774
42	0.895833	0.941176	0.866667	0.958333	0.647059	0.71875	0.830508	0.77381	0.59322	0.870968	0.546667	0.909091	0.96875	0.885714	0.955224	0.978947	0.792502	0.773467
43	0.895833	0.970588	1	0.916667	0.632353	0.742188	0.762712	0.761905	0.621469	0.903226	0.626667	0.954545	0.96875	0.857143	0.955224	0.978947	0.799477	0.780907
44	0.885417	0.970588	0.866667	0.916667	0.705882	0.679688	0.779661	0.845238	0.666667	0.806452	0.573333	1	0.9375	0.857143	0.985075	0.978947	0.803836	0.785657
45	0.927083	0.941176	0.933333	0.958333	0.735294	0.648438	0.847458	0.821429	0.627119	0.806452	0.64	0.954545	0.96875	0.85	0.940299	0.989474	0.803836	0.785769
46	0.885417	0.970588	0.866667	0.791667	0.588235	0.742188	0.813559	0.761905	0.700565	0.935484	0.653333	0.818182	0.96875	0.878571	0.955224	0.989474	0.809939	0.792194
47	0.916667	0.941176	1	0.875	0.573529	0.671875	0.847458	0.869048	0.644068	0.774194	0.586667	0.909091	0.96875	0.85	0.955224	0.989474	0.796861	0.778254
48	0.90625	1	0.866667	0.916667	0.720588	0.679688	0.79661	0.809524	0.655367	0.83871	0.64	0.863636	0.96875	0.885714	0.955224	0.978947	0.809067	0.791409
49	0.916667	0.941176	1	0.875	0.647059	0.640625	0.898305	0.809524	0.711864	0.870968	0.586667	0.954545	1	0.864286	0.955224	0.989474	0.812554	0.795197
50	0.947917	0.941176	1	0.916667	0.691176	0.695312	0.898305	0.761905	0.649718	0.903226	0.573333	0.954545	1	0.885714	0.940299	0.978947	0.812554	0.795913
51	0.90625	0.911765	1	0.958333	0.617647	0.695312	0.813559	0.833333	0.683616	0.935484	0.586667	0.909091	1	0.892857	0.940299	0.978947	0.812554	0.795422
52	0.927083	0.970588	1	0.833333	0.661765	0.703125	0.830508	0.738095	0.638418	0.806452	0.573333	0.954545	0.96875	0.864286	0.940299	0.957895	0.794246	0.775446
53	0.916667	1	1	0.916667	0.602941	0.640625	0.932203	0.809524	0.615819	0.903226	0.586667	0.954545	0.9375	0.864286	0.955224	0.989474	0.798605	0.780366
54	0.947917	0.970588	1	0.916667	0.661765	0.632812	0.898305	0.821429	0.666667	0.870968	0.64	0.909091	1	0.885714	0.940299	0.978947	0.814298	0.797088
55	0.885417	1	1	0.833333	0.617647	0.703125	0.79661	0.809524	0.59887	0.903226	0.6	0.954545	0.96875	0.878571	0.955224	0.978947	0.795118	0.776357
56	0.90625	0.970588	0.933333	0.875	0.676471	0.71875	0.864407	0.809524	0.706215	0.774194	0.653333	1	1	0.885714	0.940299	1	0.82476	0.808494
57	0.885417	0.970588	0.933333	0.958333	0.558824	0.695312	0.830508	0.738095	0.677966	0.83871	0.533333	0.863636	0.96875	0.885714	0.925373	0.978947	0.79163	0.77244
58	0.895833	0.911765	0.933333	0.958333	0.75	0.742188	0.864407	0.809524	0.717514	0.870968	0.546667	0.954545	0.9375	0.878571	0.925373	0.989474	0.823017	0.806429
59	0.895833	0.911765	0.933333	0.916667	0.647059	0.640625	0.898305	0.880952	0.661017	0.903226	0.613333	0.954545	1	0.878571	0.940299	0.978947	0.809939	0.792666
60	0.895833	0.941176	0.933333	0.875	0.676471	0.742188	0.898305	0.785714	0.638418	0.870968	0.573333	0.909091	0.96875	0.857143	0.955224	1	0.807323	0.790187
61	0.864583	0.911765	1	0.875	0.661765	0.6875	0.881356	0.785714	0.649718	0.903226	0.52	0.954545	0.96875	0.857143	0.955224	0.957895	0.793374	0.774202
62	0.895833	1	0.933333	0.958333	0.632353	0.742188	0.847458	0.75	0.666667	0.806452	0.666667	0.954545	1	0.864286	0.985075	0.989474	0.81517	0.798221
63	0.916667	1	0.933333	1	0.75	0.664062	0.830508	0.797619	0.632768	0.903226	0.653333	0.954545	1	0.878571	0.955224	0.978947	0.814298	0.797528
64	0.9375	0.970588	0.933333	0.958333	0.617647	0.65625	0.745763	0.77381	0.638418	0.806452	0.586667	1	0.96875	0.878571	0.955224	0.989474	0.794246	0.775343
65	0.875	1	0.933333	1	0.691176	0.664062	0.79661	0.880952	0.711864	0.903226	0.6	0.909091	0.96875	0.878571	0.955224	0.957895	0.816914	0.799863
66	0.927083	0.970588	0.933333	0.958333	0.617647	0.765625	0.830508	0.833333	0.666667	0.806452	0.6	0.954545	0.96875	0.9	0.955224	1	0.822145	0.805929
67	0.916667	1	0.933333	0.916667	0.558824	0.71875	0.762712	0.77381	0.661017	0.774194	0.586667	0.954545	0.96875	0.871429	0.940299	0.989474	0.796861	0.778076
68	0.864583	0.941176	0.933333	0.958333	0.691176	0.648438	0.728814	0.77381	0.615819	0.903226	0.693333	0.909091	1	0.878571	0.940299	0.989474	0.794246	0.775452
69	0.895833	1	1	1	0.720588	0.695312	0.830508	0.833333	0.677966	0.870968	0.626667	1	0.96875	0.864286	0.955224	0.989474	0.821273	0.804907
70	0.9375	0.970588	0.866667	1	0.617647	0.671875	0.898305	0.845238	0.661017	0.870968	0.626667	0.954545	1	0.864286	0.925373	0.989474	0.813426	0.796267
71	0.885417	0.970588	1	0.958333	0.558824	0.679688	0.745763	0.869048	0.694915	0.806452	0.546667	0.954545	0.9375	0.907143	0.940299	0.989474	0.803836	0.78539
72	0.9375	0.970588	0.933333	0.916667	0.661765	0.695312	0.864407	0.809524	0.649718	0.83871	0.64	0.954545	1	0.864286	0.955224	0.989474	0.813426	0.796533
73	0.916667	1	1	1	0.632353	0.671875	0.813559	0.821429	0.672316	0.774194	0.613333	0.954545	0.90625	0.878571	0.940299	0.989474	0.807323	0.789522
74	0.916667	1	1	1	0.514706	0.710938	0.813559	0.833333	0.694915	0.83871	0.626667	1	0.96875	0.878571	0.955224	0.989474	0.81517	0.798305
75	0.9375	0.970588	0.866667	1	0.691176	0.609375	0.830508	0.761905	0.689266	0.903226	0.653333	0.954545	1	0.864286	0.925373	0.989474	0.808195	0.79068
76	0.916667	1	0.933333	1	0.720588	0.6875	0.779661	0.809524	0.689266	0.903226	0.6	1	0.96875	0.871429	0.940299	0.989474	0.817786	0.800575
77	0.90625	1	1	1	0.602941	0.710938	0.830508	0.797619	0.661017	0.903226	0.773333	1	0.9375	0.871429	0.940299	0.989474	0.821273	0.805059
78	0.916667	0.941176	0.933333	0.916667	0.661765	0.6875	0.779661	0.821429	0.644068	0.83871	0.64	0.954545	1	0.878571	0.955224	0.989474	0.807323	0.789532
79	0.90625	0.941176	1	0.916667	0.661765	0.6875	0.813559	0.761905	0.689266	0.83871	0.6	1	0.96875	0.857143	0.955224	0.989474	0.806452	0.788688
80	0.90625	0.970588	1	0.875	0.676471	0.632812	0.847458	0.785714	0.672316	0.83871	0.626667	0.954545	0.9375	0.871429	0.925373	0.989474	0.802092	0.783466
81	0.895833	1	1	0.833333	0.558824	0.703125	0.79661	0.821429	0.683616	0.774194	0.626667	0.954545	0.96875	0.842857	0.940299	0.989474	0.800349	0.781644
82	0.895833	0.970588	0.933333	0.916667	0.632353	0.6875	0.79661	0.809524	0.638418	0.903226	0.573333	0.909091	0.96875	0.835714	0.940299	0.989474	0.793374	0.774519
83	0.895833	1	1	0.916667	0.632353	0.6875	0.79661	0.833333	0.689266	0.870968	0.586667	0.954545	1	0.864286	0.940299	0.989474	0.809939	0.792398
84	0.885417	1	1	0.875	0.573529	0.6875	0.847458	0.821429	0.694915	0.774194	0.506667	1	1	0.878571	0.940299	0.989474	0.802092	0.783649
85	0.895833	1	0.933333	0.916667	0.691176	0.679688	0.813559	0.821429	0.638418	0.741935	0.666667	0.954545	0.96875	0.864286	0.985075	0.989474	0.807323	0.789788
86	0.90625	1	0.933333	0.833333	0.602941	0.640625	0.813559	0.833333	0.672316	0.83871	0.6	1	1	0.914286	0.940299	0.989474	0.806452	0.788337
87	0.916667	0.941176	0.933333	0.958333	0.617647	0.671875	0.864407	0.821429	0.694915	0.806452	0.653333	0.909091	0.96875	0.85	0.955224	0.989474	0.810811	0.793036
88	0.916667	0.911765	0.933333	0.916667	0.647059	0.695312	0.881356	0.785714	0.683616	0.870968	0.613333	1	1	0.871429	0.955224	1	0.81517	0.798027
89	0.90625	0.911765	1	0.875	0.676471	0.6875	0.830508	0.845238	0.706215	0.870968	0.613333	0.954545	1	0.871429	0.940299	0.989474	0.817786	0.801006
90	0.916667	1	0.933333	1	0.632353	0.726562	0.847458	0.785714	0.717514	0.806452	0.613333	0.909091	0.96875	0.857143	0.955224	0.989474	0.818657	0.802011
91	0.90625	1	0.866667	0.833333	0.691176	0.703125	0.79661	0.785714	0.655367	0.903226	0.573333	1	1	0.885714	0.955224	0.989474	0.808195	0.790517
92	0.895833	0.970588	1	0.958333	0.676471	0.671875	0.813559	0.821429	0.717514	0.870968	0.626667	0.909091	0.96875	0.857143	0.955224	0.989474	0.816042	0.798961
93	0.854167	0.941176	0.933333	0.875	0.676471	0.679688	0.813559	0.857143	0.649718	0.903226	0.653333	0.954545	0.9375	0.835714	0.970149	0.989474	0.802964	0.784904
94	0.895833	1	1	0.875	0.676471	0.679688	0.813559	0.857143	0.683616	0.83871	0.666667	0.954545	0.9375	0.878571	0.910448	0.989474	0.81517	0.797829
95	0.947917	0.941176	1	0.958333	0.676471	0.648438	0.762712	0.833333	0.694915	0.806452	0.68	1	1	0.864286	0.925373	0.989474	0.81517	0.797997
96	0.927083	0.941176	0.933333	0.958333	0.588235	0.703125	0.864407	0.821429	0.661017	0.83871	0.626667	1	0.9375	0.871429	0.910448	0.989474	0.808195	0.790271
97	0.895833	0.970588	0.933333	0.875	0.529412	0.695312	0.762712	0.797619	0.689266	0.870968	0.68	0.954545	0.9375	0.857143	0.955224	0.989474	0.802092	0.783634
98	0.958333	0.970588	0.866667	1	0.735294	0.664062	0.79661	0.857143	0.683616	0.935484	0.72	1	0.9375	0.85	0.955224	0.989474	0.827376	0.811553
99	0.927083	0.941176	1	0.916667	0.676471	0.710938	0.864407	0.761905	0.672316	0.83871	0.64	0.954545	0.96875	0.871429	0.940299	1	0.81517	0.798089
100	0.9375	0.941176	1	1	0.647059	0.710938	0.762712	0.821429	0.700565	0.774194	0.706667	1	0.96875	0.878571	0.940299	1	0.823888	0.807352
101	0.885417	0.970588	1	0.916667	0.558824	0.671875	0.881356	0.75	0.666667	0.870968	0.64	0.954545	1	0.864286	0.970149	0.989474	0.802092	0.783926
102	0.947917	0.941176	0.933333	0.916667	0.588235	0.640625	0.813559	0.75	0.694915	0.870968	0.653333	0.954545	0.96875	0.864286	0.940299	0.989474	0.802964	0.784459
103	0.947917	1	0.866667	0.875	0.676471	0.679688	0.79661	0.797619	0.627119	0.806452	0.72	0.954545	0.96875	0.864286	0.940299	0.989474	0.807323	0.78963
104	0.895833	1	0.933333	1	0.632353	0.6875	0.779661	0.869048	0.672316	0.870968	0.666667	1	1	0.857143	0.955224	0.989474	0.816042	0.799294
105	0.885417	0.970588	1	0.833333	0.661765	0.648438	0.864407	0.761905	0.683616	0.83871	0.6	0.954545	1	0.892857	0.925373	0.989474	0.803836	0.785702
106	0.90625	1	0.933333	0.958333	0.661765	0.601562	0.79661	0.797619	0.700565	0.806452	0.706667	0.909091	0.9375	0.885714	0.955224	0.989474	0.809067	0.791139
107	0.927083	0.970588	0.933333	0.958333	0.735294	0.617188	0.779661	0.77381	0.700565	0.870968	0.6	1	0.96875	0.842857	0.910448	0.989474	0.802964	0.78456
108	0.90625	0.970588	0.933333	0.958333	0.647059	0.65625	0.745763	0.833333	0.683616	0.83871	0.666667	0.909091	1	0.864286	0.970149	0.989474	0.809067	0.791192
109	0.875	1	0.933333	0.958333	0.485294	0.664062	0.779661	0.77381	0.683616	0.774194	0.706667	0.954545	1	0.857143	0.955224	0.989474	0.79599	0.77681
110	0.885417	0.970588	0.866667	0.958333	0.705882	0.625	0.779661	0.75	0.638418	0.935484	0.666667	0.909091	0.90625	0.85	0.940299	0.989474	0.79163	0.772723
111	0.9375	0.941176	0.866667	1	0.573529	0.585938	0.762712	0.785714	0.683616	0.83871	0.613333	0.954545	0.90625	0.871429	0.940299	0.989474	0.789887	0.77001
112	0.916667	0.970588	1	1	0.544118	0.703125	0.79661	0.77381	0.689266	0.774194	0.626667	1	1	0.864286	0.955224	0.989474	0.806452	0.788203
113	0.927083	0.941176	0.866667	0.958333	0.632353	0.664062	0.813559	0.833333	0.655367	0.806452	0.68	0.954545	1	0.878571	0.940299	0.989474	0.809067	0.791604
114	0.9375	0.941176	0.933333	0.958333	0.691176	0.648438	0.762712	0.809524	0.666667	0.83871	0.573333	0.909091	1	0.85	0.985075	0.989474	0.802092	0.783977
115	0.9375	0.970588	1	0.916667	0.588235	0.648438	0.830508	0.857143	0.672316	0.935484	0.653333	1	0.96875	0.892857	0.955224	1	0.817786	0.801005
116	0.90625	0.970588	0.933333	1	0.588235	0.640625	0.864407	0.785714	0.666667	0.83871	0.613333	0.954545	0.96875	0.878571	0.925373	0.989474	0.800349	0.781995
117	0.916667	1	0.933333	1	0.632353	0.664062	0.847458	0.821429	0.694915	0.83871	0.68	0.909091	0.96875	0.878571	0.940299	0.989474	0.817786	0.800652
118	0.958333	0.941176	0.866667	0.875	0.647059	0.679688	0.79661	0.845238	0.655367	0.806452	0.613333	0.863636	0.90625	0.871429	0.940299	0.989474	0.802964	0.785013
119	0.9375	1	0.933333	1	0.544118	0.710938	0.779661	0.785714	0.689266	0.935484	0.693333	1	1	0.857143	0.970149	0.989474	0.817786	0.80075
120	0.90625	0.970588	0.933333	0.958333	0.558824	0.65625	0.79661	0.785714	0.706215	0.774194	0.626667	0.909091	0.9375	0.864286	0.940299	0.989474	0.798605	0.779815
121	0.9375	0.970588	1	0.958333	0.514706	0.617188	0.762712	0.77381	0.649718	0.83871	0.693333	0.863636	1	0.878571	0.955224	0.989474	0.793374	0.774416
122	0.9375	0.970588	0.933333	1	0.602941	0.617188	0.762712	0.821429	0.644068	0.806452	0.666667	0.909091	1	0.835714	0.955224	0.989474	0.794246	0.775437
123	0.958333	0.970588	0.933333	0.875	0.602941	0.703125	0.830508	0.761905	0.655367	0.903226	0.613333	1	1	0.878571	0.940299	0.989474	0.809067	0.791828
124	0.895833	0.970588	0.866667	0.958333	0.529412	0.617188	0.79661	0.797619	0.615819	0.83871	0.626667	1	0.96875	0.857143	0.955224	0.989474	0.78204	0.761994
125	0.895833	1	1	0.875	0.691176	0.71875	0.847458	0.857143	0.700565	0.83871	0.64	0.954545	1	0.878571	0.955224	0.989474	0.827376	0.811216
126	0.9375	0.941176	0.933333	0.916667	0.647059	0.632812	0.762712	0.761905	0.683616	0.903226	0.64	1	1	0.871429	0.970149	0.989474	0.80558	0.787375
127	0.927083	0.970588	1	0.875	0.558824	0.640625	0.830508	0.833333	0.644068	0.741935	0.706667	1	0.96875	0.85	0.925373	0.989474	0.797733	0.779053
128	0.90625	0.970588	0.933333	0.916667	0.588235	0.632812	0.728814	0.785714	0.689266	0.870968	0.626667	1	0.96875	0.871429	0.895522	0.989474	0.794246	0.774798
129	0.927083	0.970588	1	0.958333	0.588235	0.640625	0.847458	0.809524	0.728814	0.870968	0.653333	0.954545	1	0.842857	0.970149	0.989474	0.81517	0.797991
130	0.9375	1	0.933333	0.916667	0.573529	0.695312	0.830508	0.738095	0.677966	0.83871	0.613333	0.909091	1	0.864286	0.940299	0.989474	0.802964	0.784784
131	0.9375	0.941176	0.933333	0.916667	0.632353	0.59375	0.813559	0.785714	0.60452	0.903226	0.666667	1	1	0.9	0.955224	0.989474	0.796861	0.778278
132	0.916667	0.941176	0.866667	0.916667	0.573529	0.6875	0.79661	0.785714	0.581921	0.935484	0.68	0.909091	0.96875	0.914286	0.970149	0.989474	0.798605	0.780566
133	0.916667	1	1	1	0.647059	0.734375	0.745763	0.869048	0.677966	0.870968	0.613333	0.909091	0.96875	0.878571	0.970149	0.989474	0.821273	0.804912
134	0.885417	0.970588	0.866667	0.916667	0.632353	0.65625	0.830508	0.809524	0.666667	0.806452	0.586667	0.954545	1	0.878571	0.970149	0.989474	0.801221	0.782642
135	0.916667	0.970588	0.933333	0.916667	0.602941	0.648438	0.728814	0.809524	0.700565	0.83871	0.6	0.954545	0.96875	0.878571	0.955224	0.989474	0.802092	0.783578
136	0.927083	0.970588	1	0.958333	0.75	0.671875	0.779661	0.809524	0.683616	0.870968	0.626667	0.863636	0.96875	0.857143	0.985075	0.989474	0.816042	0.799299
137	0.916667	0.941176	1	0.916667	0.647059	0.632812	0.79661	0.797619	0.683616	0.741935	0.586667	1	0.96875	0.878571	0.955224	0.989474	0.800349	0.781512
138	0.895833	0.941176	0.933333	0.958333	0.647059	0.703125	0.779661	0.72619	0.694915	0.741935	0.626667	0.954545	0.96875	0.857143	0.955224	0.989474	0.801221	0.782584
139	0.90625	0.941176	0.8	0.958333	0.632353	0.6875	0.762712	0.833333	0.672316	0.870968	0.653333	0.954545	0.96875	0.871429	0.955224	0.989474	0.808195	0.790559
140	0.927083	0.970588	0.933333	0.875	0.735294	0.664062	0.830508	0.785714	0.694915	0.870968	0.666667	0.863636	0.9375	0.857143	0.955224	0.989474	0.814298	0.797139
141	0.9375	0.970588	0.866667	0.916667	0.676471	0.664062	0.830508	0.77381	0.649718	0.83871	0.693333	0.909091	0.90625	0.892857	0.940299	0.989474	0.808195	0.790384
142	0.9375	0.970588	0.933333	1	0.602941	0.710938	0.813559	0.809524	0.655367	0.870968	0.613333	0.954545	1	0.864286	0.940299	0.989474	0.809939	0.792265
143	0.916667	0.970588	0.866667	1	0.632353	0.632812	0.79661	0.785714	0.644068	0.870968	0.653333	0.954545	0.96875	0.907143	0.955224	0.989474	0.803836	0.785623
144	0.927083	0.970588	0.933333	0.958333	0.632353	0.734375	0.813559	0.714286	0.689266	0.870968	0.666667	0.909091	0.9375	0.885714	0.985075	0.989474	0.816914	0.800073
145	0.916667	0.970588	1	0.958333	0.544118	0.648438	0.762712	0.77381	0.689266	0.870968	0.68	0.909091	1	0.857143	0.940299	0.989474	0.800349	0.781879
146	0.927083	0.970588	1	0.916667	0.75	0.65625	0.864407	0.845238	0.711864	0.83871	0.613333	0.954545	1	0.864286	0.970149	0.989474	0.825632	0.809331
147	0.916667	0.970588	1	1	0.617647	0.734375	0.881356	0.714286	0.672316	0.806452	0.546667	0.954545	1	0.85	0.940299	0.989474	0.803836	0.785829
148	0.947917	0.970588	1	0.958333	0.676471	0.710938	0.779661	0.797619	0.706215	0.870968	0.68	0.954545	1	0.85	0.940299	0.989474	0.823017	0.806663
149	0.927083	1	0.933333	0.916667	0.705882	0.671875	0.728814	0.821429	0.666667	0.83871	0.546667	1	0.96875	0.892857	0.925373	0.989474	0.80558	0.787603
150	0.916667	0.970588	0.933333	1	0.617647	0.640625	0.762712	0.75	0.666667	0.806452	0.68	0.954545	1	0.85	0.940299	0.989474	0.796861	0.778131
151	0.979167	0.941176	1	0.958333	0.632353	0.640625	0.745763	0.785714	0.621469	0.903226	0.64	0.909091	1	0.857143	0.985075	0.989474	0.799477	0.781053
152	0.947917	0.970588	0.933333	1	0.735294	0.664062	0.79661	0.821429	0.694915	0.870968	0.666667	0.954545	1	0.9	0.940299	0.989474	0.827376	0.811244
153	0.958333	0.970588	0.866667	0.958333	0.617647	0.671875	0.830508	0.785714	0.689266	0.870968	0.68	0.909091	1	0.878571	0.940299	1	0.816914	0.799823
154	0.927083	0.970588	1	0.875	0.602941	0.632812	0.813559	0.75	0.683616	0.870968	0.533333	1	1	0.857143	0.925373	0.989474	0.792502	0.773255
155	0.927083	0.970588	0.933333	0.958333	0.632353	0.703125	0.813559	0.809524	0.700565	0.806452	0.573333	0.909091	1	0.857143	0.955224	0.989474	0.810811	0.793389
156	0.9375	0.970588	0.933333	0.958333	0.661765	0.6875	0.779661	0.72619	0.677966	0.903226	0.546667	0.954545	0.9375	0.864286	0.970149	0.989474	0.802092	0.783863
157	0.864583	0.970588	0.866667	0.916667	0.602941	0.65625	0.79661	0.797619	0.649718	0.774194	0.706667	0.954545	1	0.885714	0.955224	1	0.800349	0.781863
158	0.9375	0.970588	1	0.916667	0.647059	0.703125	0.79661	0.797619	0.689266	0.741935	0.626667	1	1	0.864286	0.940299	0.989474	0.812554	0.795021
159	0.885417	0.970588	0.933333	0.916667	0.617647	0.640625	0.864407	0.714286	0.694915	0.935484	0.533333	0.863636	0.96875	0.864286	0.955224	0.989474	0.793374	0.774057
160	0.947917	0.941176	0.866667	0.958333	0.573529	0.671875	0.830508	0.785714	0.740113	0.903226	0.6	1	0.9375	0.842857	0.925373	0.989474	0.809939	0.792408
161	0.9375	0.941176	0.933333	0.958333	0.676471	0.695312	0.762712	0.72619	0.717514	0.870968	0.626667	0.954545	1	0.871429	0.955224	0.989474	0.814298	0.796828
162	0.958333	0.941176	0.933333	0.958333	0.558824	0.679688	0.79661	0.809524	0.694915	0.903226	0.64	0.909091	0.96875	0.842857	0.955224	0.989474	0.808195	0.790609
163	0.916667	0.970588	0.933333	0.916667	0.632353	0.617188	0.847458	0.738095	0.638418	0.870968	0.626667	1	1	0.871429	0.940299	0.989474	0.794246	0.775387
164	0.916667	0.911765	0.933333	0.916667	0.588235	0.757812	0.745763	0.77381	0.677966	0.870968	0.52	0.909091	1	0.85	0.955224	0.989474	0.798605	0.780169
165	0.9375	0.970588	1	0.916667	0.632353	0.601562	0.762712	0.785714	0.711864	0.83871	0.626667	0.954545	1	0.871429	0.955224	0.989474	0.804708	0.786537
166	0.947917	0.970588	0.933333	0.916667	0.691176	0.625	0.79661	0.761905	0.59887	0.741935	0.546667	0.909091	0.84375	0.864286	0.940299	0.989474	0.778553	0.758004
167	0.895833	0.970588	0.933333	0.916667	0.661765	0.671875	0.745763	0.833333	0.683616	0.870968	0.613333	1	0.9375	0.928571	0.925373	0.989474	0.812554	0.795241
168	0.927083	0.970588	0.933333	0.958333	0.617647	0.625	0.779661	0.738095	0.683616	0.967742	0.653333	0.909091	1	0.871429	0.970149	0.989474	0.803836	0.785791
169	0.927083	0.970588	0.8	0.958333	0.691176	0.640625	0.864407	0.75	0.689266	0.870968	0.52	0.954545	0.96875	0.871429	0.910448	0.989474	0.799477	0.780924
170	0.885417	0.941176	0.866667	0.916667	0.602941	0.75	0.847458	0.785714	0.740113	0.83871	0.706667	0.954545	1	0.9	0.955224	0.989474	0.829991	0.814189
171	0.947917	0.970588	1	0.958333	0.705882	0.6875	0.762712	0.785714	0.638418	0.774194	0.666667	0.954545	0.96875	0.892857	0.940299	0.989474	0.810811	0.793395
172	0.947917	0.970588	0.933333	0.916667	0.558824	0.625	0.745763	0.761905	0.706215	0.806452	0.56	0.909091	0.96875	0.885714	0.940299	0.989474	0.793374	0.773935
173	0.958333	0.941176	0.933333	0.958333	0.632353	0.664062	0.762712	0.821429	0.711864	0.870968	0.626667	0.909091	0.9375	0.857143	0.955224	0.989474	0.811683	0.794114
174	0.885417	0.970588	0.933333	0.958333	0.661765	0.679688	0.813559	0.785714	0.683616	0.870968	0.72	0.954545	1	0.864286	0.955224	0.989474	0.81517	0.798127
175	0.947917	0.941176	1	0.875	0.573529	0.679688	0.847458	0.738095	0.661017	0.741935	0.6	0.863636	0.96875	0.878571	0.955224	0.989474	0.79599	0.777264
176	0.916667	0.970588	0.933333	0.916667	0.632353	0.710938	0.847458	0.797619	0.706215	0.83871	0.64	0.954545	1	0.857143	0.970149	0.989474	0.818657	0.801676
177	0.916667	0.970588	1	0.875	0.617647	0.679688	0.847458	0.738095	0.683616	0.870968	0.626667	0.954545	0.96875	0.9	0.970149	0.989474	0.810811	0.793257
178	0.90625	0.941176	1	0.958333	0.602941	0.6875	0.813559	0.821429	0.694915	0.935484	0.626667	0.954545	0.9375	0.85	0.940299	0.989474	0.809939	0.792286
179	0.90625	0.970588	0.933333	0.958333	0.661765	0.726562	0.813559	0.833333	0.661017	0.806452	0.546667	0.909091	0.96875	0.885714	0.970149	0.989474	0.810811	0.793658
180	0.885417	0.970588	0.933333	0.916667	0.661765	0.703125	0.779661	0.75	0.677966	0.83871	0.6	1	0.90625	0.871429	0.955224	0.989474	0.802092	0.7838
181	0.895833	0.970588	1	0.958333	0.691176	0.664062	0.813559	0.72619	0.683616	0.774194	0.68	0.954545	0.96875	0.857143	0.955224	0.989474	0.80558	0.787495
182	0.927083	0.970588	0.866667	0.916667	0.632353	0.679688	0.779661	0.869048	0.734463	0.83871	0.693333	0.909091	0.9375	0.857143	0.970149	0.989474	0.822145	0.80568
183	0.916667	0.941176	0.866667	0.958333	0.602941	0.671875	0.864407	0.75	0.677966	0.741935	0.626667	0.954545	0.9375	0.85	0.955224	0.989474	0.797733	0.778937
184	0.916667	1	0.933333	0.958333	0.632353	0.609375	0.762712	0.785714	0.655367	0.83871	0.613333	0.909091	0.96875	0.871429	0.940299	0.989474	0.792502	0.773508
185	0.9375	0.970588	0.933333	0.916667	0.647059	0.6875	0.830508	0.738095	0.683616	0.935484	0.506667	0.954545	0.96875	0.864286	0.955224	0.989474	0.802964	0.784745
186	0.927083	0.970588	0.933333	0.958333	0.647059	0.65625	0.847458	0.821429	0.672316	0.870968	0.586667	0.909091	0.96875	0.857143	0.985075	0.989474	0.808195	0.790414
187	0.927083	0.970588	0.866667	0.916667	0.676471	0.703125	0.762712	0.809524	0.677966	0.903226	0.613333	1	0.96875	0.878571	0.940299	0.989474	0.813426	0.796141
188	0.927083	0.970588	0.866667	0.958333	0.691176	0.664062	0.711864	0.821429	0.661017	0.870968	0.626667	0.909091	0.96875	0.864286	0.955224	0.989474	0.803836	0.78575
189	0.9375	0.970588	0.866667	0.958333	0.647059	0.664062	0.847458	0.77381	0.689266	0.774194	0.56	0.909091	0.9375	0.85	0.955224	0.989474	0.800349	0.781733
190	0.927083	0.970588	0.933333	0.916667	0.647059	0.703125	0.779661	0.77381	0.672316	0.83871	0.653333	1	0.96875	0.907143	0.955224	0.989474	0.81517	0.798092
191	0.958333	1	0.933333	1	0.632353	0.679688	0.779661	0.797619	0.683616	0.903226	0.693333	0.954545	1	0.878571	0.880597	0.989474	0.816914	0.800263
192	0.90625	0.970588	1	0.958333	0.617647	0.6875	0.779661	0.75	0.717514	0.806452	0.533333	1	0.96875	0.828571	0.955224	0.989474	0.798605	0.779916
193	0.90625	0.941176	1	0.916667	0.720588	0.703125	0.813559	0.714286	0.661017	0.774194	0.56	1	0.9375	0.864286	0.925373	0.989474	0.797733	0.77918
194	0.927083	0.970588	0.933333	0.875	0.647059	0.734375	0.881356	0.761905	0.638418	0.83871	0.613333	0.954545	0.96875	0.885714	0.955224	0.989474	0.810811	0.793679
195	0.947917	0.970588	0.933333	0.916667	0.764706	0.6875	0.779661	0.797619	0.649718	0.870968	0.626667	1	0.90625	0.857143	0.940299	0.989474	0.810811	0.793498
196	0.90625	1	0.933333	0.958333	0.705882	0.671875	0.830508	0.75	0.661017	0.806452	0.68	1	0.96875	0.871429	0.970149	0.989474	0.811683	0.794425
197	0.9375	0.970588	1	0.916667	0.632353	0.679688	0.779661	0.833333	0.655367	0.806452	0.666667	0.954545	0.9375	0.857143	0.955224	0.989474	0.807323	0.789439
198	0.90625	0.970588	0.933333	0.958333	0.632353	0.65625	0.762712	0.809524	0.655367	0.83871	0.56	0.909091	0.9375	0.857143	0.925373	0.989474	0.790759	0.771405
199	0.927083	0.970588	0.866667	0.958333	0.602941	0.703125	0.711864	0.77381	0.655367	0.83871	0.56	0.954545	0.96875	0.885714	0.955224	0.989474	0.796861	0.77796
200	0.9375	0.970588	1	0.958333	0.691176	0.703125	0.779661	0.785714	0.683616	0.709677	0.573333	1	1	0.864286	0.910448	0.989474	0.807323	0.789552
201	0.916667	0.970588	0.933333	0.916667	0.573529	0.585938	0.847458	0.761905	0.661017	0.83871	0.64	0.863636	0.96875	0.835714	0.955224	0.989474	0.785527	0.765756
202	0.9375	0.970588	0.933333	0.958333	0.544118	0.617188	0.813559	0.77381	0.638418	0.806452	0.506667	0.954545	0.90625	0.878571	0.970149	0.989474	0.78204	0.761831
203	0.916667	0.970588	1	0.958333	0.661765	0.6875	0.779661	0.785714	0.661017	0.774194	0.626667	0.954545	0.9375	0.857143	0.970149	0.989474	0.803836	0.785973
204	0.916667	0.941176	1	0.916667	0.573529	0.640625	0.762712	0.738095	0.666667	0.806452	0.653333	0.954545	0.96875	0.871429	0.940299	0.989474	0.79163	0.772505
205	0.885417	0.941176	0.933333	0.958333	0.573529	0.710938	0.813559	0.809524	0.666667	0.83871	0.626667	1	0.9375	0.885714	0.955224	0.989474	0.806452	0.788639
206	0.916667	1	0.933333	0.958333	0.588235	0.734375	0.813559	0.809524	0.711864	0.935484	0.653333	1	0.90625	0.864286	0.985075	0.989474	0.823888	0.807662
207	0.916667	0.941176	0.933333	0.958333	0.632353	0.742188	0.79661	0.761905	0.694915	0.741935	0.6	1	0.96875	0.885714	0.940299	0.989474	0.811683	0.794394
208	0.895833	0.970588	1	0.916667	0.647059	0.640625	0.79661	0.738095	0.638418	0.903226	0.64	0.954545	0.96875	0.842857	0.955224	0.989474	0.79163	0.772388
209	0.895833	0.970588	0.933333	0.916667	0.632353	0.648438	0.830508	0.75	0.689266	0.870968	0.613333	0.909091	0.9375	0.871429	0.940299	0.989474	0.799477	0.78078
210	0.9375	0.941176	0.866667	0.958333	0.632353	0.671875	0.79661	0.797619	0.677966	0.774194	0.56	0.954545	0.9375	0.885714	0.955224	0.989474	0.802092	0.783864
211	0.916667	0.970588	0.933333	0.958333	0.632353	0.664062	0.79661	0.797619	0.655367	0.83871	0.613333	0.909091	0.96875	0.885714	0.970149	0.989474	0.803836	0.785724
212	0.9375	0.970588	1	0.958333	0.632353	0.65625	0.779661	0.785714	0.644068	0.806452	0.666667	0.954545	1	0.842857	0.940299	0.989474	0.799477	0.781351
213	0.947917	0.970588	0.933333	0.916667	0.705882	0.664062	0.864407	0.77381	0.723164	0.903226	0.653333	0.863636	1	0.864286	0.940299	0.989474	0.822145	0.805741
214	0.9375	0.970588	0.933333	0.958333	0.691176	0.710938	0.830508	0.785714	0.711864	0.870968	0.546667	0.954545	1	0.871429	0.955224	0.989474	0.819529	0.803147
215	0.958333	0.970588	0.866667	0.958333	0.676471	0.617188	0.745763	0.809524	0.706215	0.83871	0.573333	0.954545	0.96875	0.85	0.955224	0.989474	0.802964	0.784714
216	0.916667	0.970588	0.933333	0.958333	0.617647	0.679688	0.830508	0.809524	0.666667	0.870968	0.586667	0.954545	0.9375	0.878571	0.985075	0.989474	0.808195	0.790701
217	0.927083	0.970588	0.933333	0.958333	0.602941	0.648438	0.830508	0.797619	0.734463	0.83871	0.64	0.909091	0.90625	0.85	0.940299	0.989474	0.809067	0.791171
218	0.947917	0.970588	0.866667	0.958333	0.647059	0.609375	0.881356	0.75	0.677966	0.83871	0.653333	0.909091	0.96875	0.878571	0.970149	1	0.807323	0.78937
219	0.9375	0.941176	0.933333	0.916667	0.588235	0.679688	0.847458	0.77381	0.728814	0.903226	0.626667	0.909091	0.9375	0.828571	0.955224	0.989474	0.809067	0.791175
220	0.947917	0.941176	1	0.916667	0.691176	0.703125	0.79661	0.77381	0.734463	0.806452	0.626667	1	0.9375	0.892857	0.970149	0.989474	0.825632	0.809476
221	0.885417	0.970588	1	0.958333	0.617647	0.6875	0.847458	0.72619	0.723164	0.83871	0.64	0.954545	0.96875	0.857143	0.940299	0.989474	0.809067	0.791285
222	0.90625	0.970588	1	0.875	0.779412	0.664062	0.711864	0.797619	0.751412	0.806452	0.653333	0.863636	0.9375	0.9	0.955224	0.989474	0.822145	0.805571
223	0.895833	0.941176	1	0.958333	0.602941	0.695312	0.813559	0.77381	0.700565	0.806452	0.613333	1	0.90625	0.885714	0.940299	0.989474	0.807323	0.789418
224	0.9375	0.911765	1	0.958333	0.75	0.726562	0.79661	0.809524	0.717514	0.741935	0.613333	0.954545	0.96875	0.885714	0.940299	0.989474	0.825632	0.809739
225	0.885417	0.970588	1	0.916667	0.676471	0.726562	0.847458	0.75	0.655367	0.870968	0.666667	0.954545	0.96875	0.885714	0.955224	0.989474	0.814298	0.797625
226	0.958333	0.970588	0.866667	0.958333	0.735294	0.671875	0.881356	0.702381	0.694915	0.903226	0.653333	1	0.9375	0.885714	0.940299	0.989474	0.820401	0.804035
227	0.90625	0.941176	0.733333	0.958333	0.632353	0.65625	0.847458	0.785714	0.751412	0.903226	0.733333	0.954545	1	0.871429	0.985075	0.989474	0.825632	0.809427
228	0.947917	0.941176	0.933333	0.958333	0.632353	0.679688	0.830508	0.797619	0.734463	0.83871	0.666667	0.909091	0.96875	0.892857	0.940299	0.989474	0.823888	0.807412
229	0.958333	0.970588	1	0.916667	0.647059	0.664062	0.79661	0.761905	0.689266	0.83871	0.613333	1	0.9375	0.871429	0.970149	0.989474	0.809939	0.792399
230	0.96875	0.970588	0.933333	0.916667	0.661765	0.703125	0.813559	0.785714	0.677966	0.806452	0.52	1	0.875	0.892857	0.970149	0.989474	0.809939	0.792621
231	0.885417	0.941176	0.933333	1	0.794118	0.710938	0.813559	0.797619	0.762712	0.83871	0.653333	0.909091	0.96875	0.857143	0.955224	0.989474	0.831735	0.816148
232	0.96875	0.970588	0.933333	0.916667	0.705882	0.710938	0.779661	0.761905	0.757062	0.83871	0.733333	0.954545	1	0.864286	0.940299	0.989474	0.83435	0.81906
233	0.90625	0.970588	0.933333	0.916667	0.617647	0.648438	0.881356	0.72619	0.700565	0.83871	0.72	0.954545	0.9375	0.85	0.940299	0.989474	0.806452	0.788164
234	0.90625	1	1	0.958333	0.617647	0.648438	0.830508	0.77381	0.677966	0.870968	0.56	0.909091	0.90625	0.864286	0.940299	0.989474	0.796861	0.778071
235	0.96875	0.941176	0.866667	0.958333	0.764706	0.710938	0.864407	0.797619	0.757062	0.83871	0.693333	0.954545	1	0.871429	0.925373	0.989474	0.841325	0.826735
236	0.9375	0.970588	1	1	0.588235	0.742188	0.830508	0.75	0.717514	0.870968	0.693333	0.954545	0.96875	0.857143	0.940299	0.989474	0.823017	0.806873
237	0.947917	0.970588	0.933333	0.916667	0.676471	0.640625	0.830508	0.785714	0.706215	0.870968	0.666667	0.909091	0.96875	0.857143	0.925373	0.989474	0.812554	0.795208
238	0.927083	0.941176	1	0.916667	0.735294	0.640625	0.881356	0.785714	0.717514	0.806452	0.666667	0.954545	0.96875	0.857143	0.970149	0.989474	0.820401	0.803634
239	0.958333	0.970588	1	0.916667	0.779412	0.609375	0.864407	0.75	0.706215	0.903226	0.68	0.954545	0.96875	0.907143	0.955224	0.989474	0.826504	0.810432
240	0.947917	0.970588	1	0.916667	0.661765	0.625	0.830508	0.738095	0.666667	0.806452	0.64	0.954545	0.96875	0.857143	0.955224	0.989474	0.800349	0.782173
241	0.947917	0.970588	0.933333	0.958333	0.661765	0.6875	0.813559	0.761905	0.655367	0.806452	0.613333	1	1	0.892857	0.955224	0.989474	0.810811	0.793483
242	0.947917	0.970588	0.933333	0.958333	0.647059	0.710938	0.745763	0.797619	0.700565	0.903226	0.56	0.909091	0.9375	0.871429	0.940299	0.989474	0.810811	0.793244
243	0.927083	0.970588	1	0.958333	0.632353	0.671875	0.830508	0.714286	0.700565	0.903226	0.68	1	1	0.871429	0.970149	0.989474	0.816042	0.799161
244	0.9375	0.970588	0.866667	0.916667	0.588235	0.664062	0.779661	0.72619	0.627119	0.774194	0.653333	0.954545	1	0.864286	0.955224	0.989474	0.789887	0.770778
245	0.916667	0.970588	1	0.916667	0.647059	0.679688	0.79661	0.77381	0.694915	0.83871	0.546667	0.909091	0.96875	0.871429	0.940299	0.989474	0.802964	0.784686
246	0.9375	0.941176	1	0.958333	0.632353	0.679688	0.779661	0.761905	0.700565	0.870968	0.666667	0.954545	1	0.885714	0.955224	0.989474	0.816042	0.798871
247	0.96875	0.941176	0.866667	0.916667	0.647059	0.6875	0.813559	0.75	0.666667	0.774194	0.6	0.909091	0.96875	0.878571	0.955224	0.989474	0.803836	0.78565
248	0.958333	0.970588	1	0.875	0.647059	0.65625	0.830508	0.72619	0.677966	0.903226	0.653333	1	0.9375	0.885714	0.940299	0.989474	0.809939	0.792303
249	0.9375	0.970588	0.866667	0.916667	0.617647	0.671875	0.864407	0.797619	0.723164	0.774194	0.68	0.909091	0.96875	0.835714	0.940299	1	0.813426	0.795925
250	0.947917	0.941176	0.933333	0.958333	0.661765	0.757812	0.847458	0.785714	0.734463	0.870968	0.626667	1	1	0.857143	0.970149	0.989474	0.832607	0.816965
251	0.9375	0.970588	0.933333	0.916667	0.705882	0.6875	0.762712	0.785714	0.666667	0.903226	0.746667	1	0.96875	0.864286	0.955224	0.989474	0.819529	0.803251
252	0.947917	0.970588	1	0.916667	0.676471	0.65625	0.813559	0.809524	0.683616	0.870968	0.706667	0.863636	0.9375	0.85	0.940299	0.989474	0.813426	0.796139
253	0.96875	1	0.933333	0.875	0.544118	0.671875	0.830508	0.761905	0.666667	0.903226	0.693333	1	0.96875	0.885714	0.940299	0.989474	0.810811	0.793605
254	0.916667	0.970588	0.933333	0.958333	0.647059	0.679688	0.830508	0.75	0.638418	0.935484	0.693333	1	1	0.892857	0.940299	0.989474	0.811683	0.794721
255	0.958333	0.970588	1	0.958333	0.691176	0.664062	0.813559	0.714286	0.757062	0.870968	0.626667	0.954545	0.96875	0.878571	0.940299	0.989474	0.822145	0.805482
256	0.927083	0.970588	1	0.958333	0.588235	0.609375	0.830508	0.714286	0.661017	0.935484	0.68	0.909091	0.9375	0.864286	0.955224	0.989474	0.79599	0.77677
257	0.947917	0.941176	0.933333	0.958333	0.632353	0.734375	0.830508	0.77381	0.666667	0.903226	0.573333	0.954545	0.9375	0.871429	0.955224	0.989474	0.811683	0.794517
258	0.927083	0.970588	0.933333	0.958333	0.705882	0.6875	0.813559	0.809524	0.649718	0.967742	0.586667	0.909091	0.96875	0.857143	0.955224	0.989474	0.809939	0.792549
259	0.958333	0.970588	0.866667	0.916667	0.720588	0.671875	0.813559	0.761905	0.734463	0.83871	0.573333	0.909091	1	0.892857	0.940299	0.989474	0.819529	0.802733
260	0.90625	0.970588	0.933333	0.916667	0.676471	0.679688	0.813559	0.821429	0.717514	0.83871	0.706667	0.954545	1	0.885714	0.940299	0.989474	0.82476	0.808508
261	0.989583	0.941176	0.866667	0.916667	0.647059	0.734375	0.847458	0.809524	0.711864	0.806452	0.613333	0.954545	1	0.85	0.955224	0.989474	0.823888	0.807841
262	0.9375	0.970588	1	0.958333	0.676471	0.617188	0.79661	0.72619	0.677966	0.83871	0.613333	0.954545	1	0.871429	0.955224	0.989474	0.801221	0.782878
263	0.9375	0.970588	1	0.916667	0.705882	0.695312	0.864407	0.809524	0.740113	0.83871	0.626667	0.954545	0.96875	0.907143	0.940299	0.989474	0.833479	0.817957
264	0.96875	0.970588	0.933333	0.916667	0.647059	0.726562	0.79661	0.785714	0.745763	0.935484	0.733333	0.954545	0.9375	0.864286	0.940299	1	0.835222	0.819998
265	0.947917	0.970588	0.8	0.958333	0.705882	0.640625	0.762712	0.761905	0.694915	0.870968	0.6	0.954545	0.96875	0.878571	0.955224	0.989474	0.807323	0.789534
266	0.9375	0.970588	0.8	0.916667	0.75	0.695312	0.728814	0.761905	0.706215	0.870968	0.64	1	0.96875	0.885714	0.955224	0.989474	0.818657	0.802037
267	0.947917	0.970588	0.933333	0.916667	0.691176	0.632812	0.762712	0.761905	0.717514	0.774194	0.64	0.909091	1	0.9	0.970149	0.989474	0.813426	0.795879
268	0.9375	0.970588	1	0.833333	0.676471	0.632812	0.881356	0.77381	0.649718	0.806452	0.573333	0.954545	0.9375	0.857143	0.940299	0.989474	0.79599	0.77752
269	0.947917	0.970588	0.933333	0.875	0.617647	0.664062	0.847458	0.797619	0.706215	0.870968	0.666667	0.954545	0.9375	0.878571	0.955224	0.989474	0.816914	0.800076
270	0.958333	0.941176	1	0.958333	0.720588	0.679688	0.881356	0.738095	0.655367	0.83871	0.666667	0.954545	0.96875	0.885714	0.955224	0.989474	0.817786	0.801204
271	0.958333	0.941176	0.933333	0.916667	0.602941	0.6875	0.79661	0.77381	0.711864	0.935484	0.666667	0.909091	0.96875	0.835714	0.955224	0.989474	0.812554	0.795278
272	0.958333	0.970588	0.933333	0.958333	0.75	0.671875	0.813559	0.75	0.711864	0.83871	0.733333	0.909091	0.96875	0.842857	0.955224	0.989474	0.823017	0.806764
273	0.916667	0.970588	0.933333	0.916667	0.691176	0.617188	0.79661	0.797619	0.661017	0.903226	0.64	1	1	0.864286	0.955224	0.989474	0.804708	0.786779
274	0.958333	0.941176	1	0.916667	0.647059	0.640625	0.79661	0.77381	0.683616	0.806452	0.666667	0.909091	0.96875	0.857143	0.940299	0.989474	0.804708	0.786814
275	0.958333	0.970588	0.933333	0.916667	0.735294	0.671875	0.762712	0.821429	0.672316	0.903226	0.666667	0.909091	0.96875	0.857143	0.985075	0.989474	0.818657	0.802008
276	0.9375	0.970588	1	0.916667	0.661765	0.6875	0.779661	0.785714	0.711864	0.774194	0.626667	0.909091	0.9375	0.864286	0.940299	0.989474	0.810811	0.793258
277	0.96875	0.970588	0.933333	0.916667	0.602941	0.578125	0.864407	0.72619	0.734463	0.806452	0.68	0.863636	0.9375	0.864286	0.925373	0.989474	0.802964	0.784322
278	0.90625	0.970588	0.933333	0.916667	0.735294	0.710938	0.728814	0.809524	0.734463	0.806452	0.72	1	0.90625	0.864286	0.955224	0.989474	0.825632	0.809288
279	0.9375	0.941176	0.933333	0.958333	0.691176	0.6875	0.79661	0.77381	0.689266	0.83871	0.68	0.909091	1	0.878571	0.970149	0.989474	0.818657	0.802047
280	0.958333	0.941176	0.933333	0.958333	0.661765	0.671875	0.661017	0.738095	0.683616	0.870968	0.666667	1	0.9375	0.864286	0.940299	0.989474	0.802964	0.785096
281	0.958333	0.970588	0.933333	0.916667	0.691176	0.609375	0.813559	0.857143	0.59322	0.870968	0.653333	1	0.96875	0.878571	0.970149	0.989474	0.803836	0.786317
282	0.947917	0.970588	1	0.916667	0.661765	0.671875	0.864407	0.785714	0.689266	0.83871	0.64	0.954545	1	0.864286	0.940299	0.989474	0.816042	0.79915
283	0.916667	0.941176	0.866667	0.916667	0.573529	0.609375	0.830508	0.714286	0.706215	0.806452	0.653333	0.954545	0.9375	0.885714	0.925373	0.989474	0.794246	0.775251
284	0.90625	1	0.933333	0.958333	0.735294	0.71875	0.779661	0.714286	0.683616	0.935484	0.733333	1	0.96875	0.878571	0.925373	0.989474	0.822145	0.805891
285	0.9375	1	0.8	0.958333	0.632353	0.671875	0.830508	0.77381	0.666667	0.870968	0.733333	0.909091	0.96875	0.871429	0.925373	0.989474	0.811683	0.79423
286	0.947917	1	1	0.958333	0.691176	0.640625	0.728814	0.785714	0.683616	0.935484	0.666667	0.954545	0.9375	0.892857	0.955224	0.989474	0.81517	0.798339
287	0.927083	0.941176	0.933333	0.833333	0.617647	0.664062	0.830508	0.738095	0.689266	0.870968	0.746667	1	0.96875	0.857143	0.940299	0.989474	0.809067	0.791513
288	0.9375	0.970588	1	0.875	0.705882	0.65625	0.745763	0.809524	0.666667	0.967742	0.64	0.909091	0.9375	0.878571	0.970149	0.989474	0.811683	0.794188
289	0.9375	0.941176	0.933333	1	0.691176	0.640625	0.830508	0.714286	0.734463	0.83871	0.773333	0.954545	0.9375	0.85	0.970149	0.989474	0.820401	0.803494
290	0.96875	0.970588	0.933333	0.916667	0.632353	0.703125	0.79661	0.785714	0.666667	0.806452	0.666667	0.954545	0.9375	0.85	0.970149	0.989474	0.810811	0.793189
291	0.916667	0.970588	0.933333	0.958333	0.705882	0.671875	0.847458	0.761905	0.734463	0.83871	0.613333	1	0.96875	0.892857	0.970149	0.989474	0.823888	0.807622
292	0.947917	1	0.933333	0.958333	0.661765	0.734375	0.830508	0.809524	0.683616	0.935484	0.786667	0.954545	0.96875	0.885714	0.940299	0.989474	0.836966	0.822271
293	0.96875	0.970588	0.866667	1	0.647059	0.710938	0.79661	0.702381	0.711864	0.935484	0.706667	1	1	0.885714	0.970149	0.989474	0.827376	0.811558
294	0.90625	0.970588	0.933333	0.916667	0.632353	0.679688	0.745763	0.75	0.621469	0.774194	0.64	0.954545	1	0.871429	0.970149	0.989474	0.792502	0.773817
295	0.96875	1	0.866667	1	0.661765	0.679688	0.745763	0.77381	0.683616	0.870968	0.666667	0.909091	0.96875	0.871429	0.925373	0.989474	0.812554	0.795375
296	0.916667	0.970588	1	1	0.573529	0.757812	0.79661	0.821429	0.711864	0.935484	0.666667	0.909091	0.9375	0.878571	0.955224	0.989474	0.826504	0.810521
297	0.927083	1	0.933333	0.916667	0.676471	0.625	0.881356	0.77381	0.655367	0.935484	0.653333	0.954545	0.96875	0.928571	0.940299	0.989474	0.81517	0.798522
298	0.958333	0.970588	0.866667	0.958333	0.735294	0.679688	0.779661	0.77381	0.638418	0.83871	0.666667	1	0.96875	0.892857	0.940299	0.989474	0.813426	0.796823
299	0.9375	0.970588	1	0.916667	0.691176	0.640625	0.813559	0.785714	0.689266	0.870968	0.6	1	1	0.871429	0.925373	0.989474	0.809939	0.792392
300	0.958333	0.970588	0.933333	0.958333	0.602941	0.734375	0.79661	0.77381	0.757062	0.806452	0.693333	1	1	0.9	0.940299	0.989474	0.83435	0.818805
301	0.927083	0.911765	1	0.958333	0.632353	0.773438	0.779661	0.75	0.706215	0.83871	0.68	0.954545	0.9375	0.9	0.955224	0.989474	0.82476	0.808824
302	0.96875	0.970588	1	1	0.676471	0.703125	0.898305	0.72619	0.610169	0.806452	0.666667	1	1	0.878571	0.985075	0.978947	0.814298	0.797452
303	0.9375	0.941176	0.866667	0.958333	0.720588	0.679688	0.79661	0.761905	0.59887	0.83871	0.613333	0.909091	1	0.864286	0.970149	0.989474	0.797733	0.779247
304	0.958333	0.941176	0.933333	0.958333	0.720588	0.6875	0.762712	0.654762	0.672316	0.806452	0.72	1	0.90625	0.871429	0.940299	0.989474	0.807323	0.78968
305	0.96875	0.970588	0.933333	0.958333	0.632353	0.679688	0.830508	0.797619	0.734463	0.870968	0.6	0.909091	0.96875	0.871429	0.910448	0.989474	0.818657	0.801805
306	0.927083	0.970588	1	0.958333	0.676471	0.625	0.813559	0.77381	0.655367	0.870968	0.68	0.954545	1	0.842857	0.970149	0.978947	0.803836	0.786196
307	0.958333	0.970588	1	0.958333	0.632353	0.585938	0.813559	0.72619	0.694915	0.870968	0.64	0.954545	0.96875	0.892857	0.970149	0.989474	0.80558	0.787272
308	0.958333	0.970588	0.933333	0.958333	0.588235	0.734375	0.830508	0.738095	0.728814	0.83871	0.76	0.954545	0.96875	0.878571	0.955224	0.989474	0.829991	0.814312
309	0.958333	0.941176	1	0.916667	0.705882	0.734375	0.847458	0.75	0.706215	0.903226	0.586667	0.954545	0.9375	0.914286	0.970149	0.989474	0.829119	0.813236
310	0.947917	0.970588	0.933333	0.958333	0.720588	0.6875	0.847458	0.785714	0.683616	0.83871	0.64	0.954545	0.9375	0.907143	0.955224	0.989474	0.823888	0.807632
311	0.927083	0.941176	1	0.958333	0.632353	0.601562	0.79661	0.761905	0.649718	0.870968	0.733333	1	1	0.9	0.970149	0.989474	0.807323	0.789429
312	0.9375	0.970588	0.933333	0.916667	0.735294	0.710938	0.830508	0.738095	0.672316	0.806452	0.68	0.954545	0.96875	0.878571	0.955224	0.989474	0.818657	0.801931
313	0.90625	0.970588	1	1	0.705882	0.664062	0.79661	0.738095	0.666667	0.903226	0.706667	1	0.96875	0.885714	0.955224	0.989474	0.81517	0.798317
314	0.90625	1	0.933333	0.833333	0.705882	0.710938	0.864407	0.785714	0.672316	0.903226	0.68	1	1	0.878571	0.970149	0.989474	0.823888	0.807866
315	0.916667	0.970588	1	0.916667	0.720588	0.679688	0.847458	0.797619	0.717514	0.83871	0.76	1	0.96875	0.9	0.955224	0.989474	0.835222	0.81991
316	0.9375	0.970588	0.866667	0.916667	0.647059	0.65625	0.830508	0.797619	0.632768	0.903226	0.666667	0.909091	0.96875	0.892857	0.970149	0.989474	0.808195	0.790677
317	0.916667	0.941176	0.8	0.875	0.720588	0.664062	0.830508	0.785714	0.672316	0.935484	0.706667	0.954545	0.9375	0.907143	0.955224	0.989474	0.818657	0.80194
318	0.958333	1	1	0.916667	0.588235	0.726562	0.779661	0.738095	0.683616	0.870968	0.586667	0.954545	0.96875	0.914286	0.925373	0.989474	0.812554	0.795205
319	0.916667	0.911765	0.933333	0.958333	0.691176	0.679688	0.881356	0.77381	0.711864	0.774194	0.786667	0.954545	1	0.857143	0.940299	0.989474	0.82476	0.80854
320	0.947917	0.941176	0.933333	0.833333	0.676471	0.65625	0.728814	0.72619	0.655367	0.967742	0.706667	1	0.96875	0.9	0.970149	0.989474	0.809067	0.791561
321	0.927083	0.941176	0.8	0.958333	0.661765	0.679688	0.898305	0.797619	0.717514	0.903226	0.613333	1	0.9375	0.864286	0.970149	1	0.821273	0.804694
322	0.958333	0.970588	1	1	0.661765	0.710938	0.881356	0.797619	0.706215	0.806452	0.64	0.818182	0.9375	0.842857	0.985075	0.989474	0.822145	0.805821
323	0.916667	0.941176	1	0.916667	0.661765	0.664062	0.745763	0.702381	0.621469	0.806452	0.653333	0.909091	0.90625	0.892857	0.925373	0.989474	0.788143	0.768479
324	0.927083	0.970588	1	0.916667	0.691176	0.65625	0.79661	0.785714	0.689266	0.83871	0.653333	1	0.96875	0.885714	0.940299	0.989474	0.814298	0.797167
325	0.927083	1	1	0.958333	0.779412	0.679688	0.830508	0.761905	0.683616	0.903226	0.666667	1	0.96875	0.871429	0.970149	1	0.826504	0.810608
326	0.947917	0.970588	0.933333	0.916667	0.75	0.664062	0.864407	0.785714	0.694915	0.806452	0.613333	0.909091	0.9375	0.885714	0.940299	0.989474	0.817786	0.800892
327	0.958333	0.941176	1	0.875	0.661765	0.671875	0.779661	0.797619	0.706215	0.870968	0.666667	0.909091	0.96875	0.885714	0.970149	0.989474	0.819529	0.802704
328	0.9375	0.941176	1	1	0.720588	0.695312	0.830508	0.761905	0.706215	0.935484	0.653333	1	0.96875	0.871429	0.955224	0.989474	0.826504	0.810593
329	0.9375	0.970588	0.933333	0.916667	0.75	0.710938	0.762712	0.75	0.666667	0.967742	0.653333	1	0.9375	0.857143	0.955224	0.989474	0.816042	0.799232
330	0.96875	0.941176	0.866667	0.958333	0.676471	0.648438	0.864407	0.797619	0.644068	0.83871	0.64	0.909091	0.96875	0.885714	0.940299	0.989474	0.809067	0.791257
331	0.947917	0.941176	0.933333	0.958333	0.632353	0.6875	0.847458	0.797619	0.683616	0.83871	0.706667	0.863636	0.96875	0.871429	0.925373	1	0.816914	0.80032
332	0.9375	1	1	0.916667	0.75	0.710938	0.762712	0.77381	0.740113	1	0.706667	0.909091	1	0.9	0.985075	0.989474	0.842197	0.82768
333	0.90625	0.970588	1	0.958333	0.661765	0.726562	0.813559	0.77381	0.728814	0.806452	0.68	1	0.96875	0.892857	0.940299	0.989474	0.827376	0.811262
334	0.947917	0.941176	1	1	0.720588	0.75	0.847458	0.821429	0.700565	0.870968	0.76	0.954545	0.96875	0.9	0.925373	0.989474	0.843941	0.829868
335	0.947917	0.970588	0.933333	0.958333	0.75	0.773438	0.847458	0.809524	0.740113	0.935484	0.733333	1	0.96875	0.892857	0.955224	0.989474	0.854403	0.840926
336	0.927083	0.970588	1	0.916667	0.691176	0.632812	0.847458	0.821429	0.723164	0.935484	0.706667	0.909091	0.9375	0.828571	0.970149	0.989474	0.820401	0.803824
337	0.9375	0.911765	1	0.916667	0.764706	0.695312	0.830508	0.809524	0.723164	0.774194	0.613333	0.954545	0.96875	0.871429	0.955224	0.989474	0.82476	0.808437
338	0.979167	0.970588	1	1	0.720588	0.671875	0.728814	0.821429	0.666667	0.870968	0.666667	0.954545	0.96875	0.878571	0.955224	0.989474	0.820401	0.803637
339	0.958333	0.970588	0.933333	0.916667	0.764706	0.671875	0.864407	0.761905	0.655367	0.83871	0.72	0.954545	1	0.878571	0.955224	0.989474	0.823017	0.806637
340	0.927083	0.970588	1	0.916667	0.823529	0.742188	0.847458	0.75	0.661017	0.903226	0.693333	0.954545	0.96875	0.878571	0.970149	0.989474	0.831735	0.816779
341	0.916667	0.970588	0.933333	0.958333	0.720588	0.648438	0.847458	0.809524	0.672316	0.774194	0.626667	0.954545	1	0.878571	0.970149	0.989474	0.813426	0.796034
342	0.916667	0.970588	0.933333	0.958333	0.691176	0.640625	0.830508	0.75	0.683616	0.935484	0.773333	0.909091	0.9375	0.878571	0.985075	1	0.820401	0.804011
343	0.9375	0.941176	0.933333	0.916667	0.676471	0.765625	0.779661	0.761905	0.706215	0.903226	0.64	0.909091	1	0.871429	0.970149	0.989474	0.82476	0.808675
344	0.9375	0.970588	1	0.916667	0.735294	0.648438	0.779661	0.761905	0.672316	0.709677	0.68	0.954545	0.90625	0.864286	0.940299	0.989474	0.804708	0.786458
345	0.927083	0.970588	1	0.916667	0.720588	0.773438	0.813559	0.845238	0.706215	1	0.64	0.909091	1	0.878571	0.925373	0.989474	0.837838	0.823085
346	0.947917	0.970588	1	0.958333	0.75	0.75	0.898305	0.833333	0.734463	0.83871	0.653333	0.863636	1	0.871429	0.940299	0.989474	0.843069	0.828541
347	0.916667	0.970588	0.866667	0.958333	0.705882	0.671875	0.830508	0.797619	0.740113	0.870968	0.706667	0.954545	0.96875	0.85	0.955224	0.989474	0.825632	0.809318
348	0.9375	0.970588	0.866667	0.916667	0.794118	0.710938	0.813559	0.821429	0.723164	0.806452	0.68	0.909091	0.96875	0.885714	0.955224	0.989474	0.83435	0.818835
349	0.947917	0.941176	1	0.958333	0.720588	0.734375	0.830508	0.77381	0.734463	0.83871	0.746667	0.818182	1	0.885714	0.970149	1	0.840453	0.825428
350	0.927083	0.970588	0.933333	0.875	0.691176	0.703125	0.79661	0.761905	0.740113	0.903226	0.573333	0.909091	0.96875	0.892857	0.970149	0.989474	0.821273	0.804591
351	0.90625	1	0.933333	0.958333	0.661765	0.742188	0.847458	0.738095	0.717514	0.806452	0.693333	0.954545	0.96875	0.864286	0.940299	0.989474	0.823017	0.806675
352	0.875	0.970588	1	0.958333	0.735294	0.671875	0.847458	0.738095	0.666667	0.903226	0.706667	0.909091	0.9375	0.885714	0.925373	0.989474	0.812554	0.795339
353	0.958333	0.970588	1	0.875	0.661765	0.679688	0.881356	0.809524	0.672316	0.903226	0.653333	1	1	0.864286	0.940299	0.989474	0.820401	0.804057
354	0.9375	0.970588	1	0.958333	0.617647	0.726562	0.813559	0.72619	0.734463	0.903226	0.693333	1	1	0.892857	0.955224	0.989474	0.829991	0.814029
355	0.9375	0.970588	1	0.958333	0.573529	0.703125	0.779661	0.833333	0.655367	0.935484	0.666667	0.954545	0.96875	0.857143	0.940299	0.989474	0.810811	0.79331
356	0.947917	1	0.933333	0.958333	0.676471	0.703125	0.79661	0.738095	0.740113	0.903226	0.653333	0.954545	1	0.85	0.970149	0.989474	0.82476	0.808603
357	0.927083	0.970588	0.933333	1	0.705882	0.625	0.79661	0.738095	0.717514	0.870968	0.666667	0.954545	0.96875	0.885714	0.955224	0.989474	0.81517	0.797831
358	0.9375	0.970588	1	1	0.764706	0.726562	0.915254	0.77381	0.661017	0.903226	0.653333	0.954545	0.96875	0.878571	0.955224	0.989474	0.830863	0.815591
359	0.9375	1	1	0.958333	0.705882	0.65625	0.847458	0.738095	0.644068	0.870968	0.64	0.863636	0.96875	0.9	0.970149	0.989474	0.810811	0.793466
360	0.947917	0.970588	0.933333	1	0.676471	0.679688	0.830508	0.845238	0.694915	0.935484	0.733333	0.909091	0.96875	0.864286	0.940299	0.989474	0.829119	0.813267
361	0.958333	0.970588	1	0.958333	0.764706	0.726562	0.813559	0.75	0.644068	0.903226	0.626667	1	0.96875	0.907143	0.970149	0.989474	0.825632	0.809761
362	0.927083	1	1	0.958333	0.647059	0.671875	0.79661	0.761905	0.762712	0.935484	0.666667	0.909091	1	0.892857	0.955224	0.989474	0.829119	0.813103
363	0.90625	1	1	1	0.720588	0.710938	0.813559	0.761905	0.677966	0.83871	0.76	0.954545	1	0.885714	0.970149	0.989474	0.829119	0.81356
364	0.916667	1	0.933333	0.833333	0.823529	0.695312	0.79661	0.785714	0.745763	0.870968	0.706667	0.909091	1	0.892857	0.955224	0.989474	0.837838	0.822568
365	0.9375	0.970588	1	1	0.617647	0.742188	0.694915	0.785714	0.661017	0.935484	0.72	1	0.96875	0.885714	0.925373	0.989474	0.818657	0.80214
366	0.96875	0.970588	1	0.916667	0.823529	0.734375	0.864407	0.785714	0.728814	0.870968	0.8	0.954545	0.96875	0.871429	0.970149	0.989474	0.853531	0.839819
367	0.885417	0.970588	0.933333	1	0.764706	0.75	0.79661	0.77381	0.740113	0.935484	0.626667	0.863636	0.96875	0.871429	0.940299	0.989474	0.829991	0.814445
368	0.9375	0.970588	0.866667	0.916667	0.691176	0.757812	0.864407	0.77381	0.689266	0.967742	0.68	0.954545	1	0.892857	0.955224	0.989474	0.83435	0.819252
369	0.916667	1	0.933333	1	0.764706	0.742188	0.881356	0.77381	0.694915	0.83871	0.706667	0.954545	0.96875	0.921429	0.970149	0.989474	0.842197	0.827435
370	0.9375	0.970588	1	0.958333	0.676471	0.71875	0.830508	0.77381	0.757062	0.83871	0.653333	0.909091	1	0.907143	0.955224	0.989474	0.836094	0.820761
371	0.9375	0.970588	0.866667	0.958333	0.691176	0.695312	0.847458	0.797619	0.745763	0.967742	0.666667	0.954545	0.96875	0.878571	0.970149	0.989474	0.835222	0.820011
372	0.927083	0.970588	0.933333	1	0.676471	0.71875	0.881356	0.77381	0.694915	0.935484	0.666667	0.863636	0.96875	0.864286	0.955224	0.989474	0.82476	0.80882
373	0.916667	0.970588	0.8	1	0.720588	0.695312	0.847458	0.797619	0.677966	0.83871	0.586667	0.954545	0.9375	0.878571	0.955224	0.989474	0.814298	0.797331
374	0.947917	1	0.933333	0.916667	0.705882	0.679688	0.847458	0.785714	0.700565	0.935484	0.68	0.909091	0.96875	0.878571	0.970149	0.989474	0.827376	0.811394
375	0.916667	0.970588	0.733333	1	0.735294	0.6875	0.813559	0.785714	0.683616	0.870968	0.706667	1	0.96875	0.871429	0.955224	0.989474	0.821273	0.804778
376	0.9375	0.970588	0.8	0.958333	0.705882	0.710938	0.830508	0.797619	0.740113	0.935484	0.613333	1	0.96875	0.885714	0.955224	0.989474	0.831735	0.815867
377	0.947917	1	0.6	0.958333	0.632353	0.765625	0.864407	0.845238	0.683616	0.903226	0.76	0.909091	0.96875	0.9	0.970149	0.978947	0.837838	0.823071
378	0.927083	0.970588	0.933333	0.958333	0.720588	0.648438	0.813559	0.761905	0.751412	0.903226	0.706667	1	0.96875	0.892857	0.955224	0.989474	0.830863	0.814813
379	0.947917	0.970588	0.866667	0.916667	0.75	0.6875	0.881356	0.738095	0.723164	0.935484	0.666667	1	1	0.885714	0.970149	0.989474	0.833479	0.817997
380	0.9375	0.970588	0.733333	1	0.661765	0.632812	0.864407	0.702381	0.661017	0.903226	0.773333	1	1	0.878571	0.955224	1	0.813426	0.7961
381	0.958333	0.970588	0.933333	0.958333	0.676471	0.726562	0.881356	0.869048	0.717514	0.870968	0.733333	0.954545	0.9375	0.892857	0.940299	0.989474	0.843941	0.82926
382	0.90625	0.970588	0.866667	0.916667	0.705882	0.742188	0.830508	0.809524	0.677966	0.903226	0.746667	0.954545	0.9375	0.885714	0.970149	0.989474	0.830863	0.815395
383	0.927083	0.970588	0.866667	1	0.602941	0.6875	0.79661	0.72619	0.745763	0.935484	0.613333	0.954545	1	0.885714	0.940299	0.989474	0.816914	0.799649
384	0.958333	1	0.866667	1	0.75	0.625	0.847458	0.809524	0.672316	0.935484	0.68	1	0.96875	0.885714	0.955224	0.989474	0.82476	0.808463
385	0.947917	1	0.933333	0.916667	0.720588	0.703125	0.932203	0.833333	0.661017	0.903226	0.733333	0.954545	0.9375	0.892857	0.940299	0.989474	0.835222	0.82022
386	0.9375	1	0.933333	1	0.632353	0.742188	0.847458	0.785714	0.728814	0.903226	0.653333	1	0.9375	0.864286	0.940299	0.989474	0.829991	0.814284
387	0.958333	0.970588	0.866667	0.958333	0.720588	0.695312	0.864407	0.809524	0.689266	0.903226	0.693333	0.954545	1	0.864286	0.970149	0.989474	0.830863	0.815396
388	0.9375	1	0.866667	1	0.588235	0.6875	0.847458	0.738095	0.666667	0.806452	0.733333	1	1	0.878571	0.985075	0.989474	0.816042	0.799145
389	0.927083	0.970588	0.733333	1	0.720588	0.71875	0.847458	0.821429	0.677966	0.83871	0.653333	1	0.96875	0.864286	0.970149	0.989474	0.823888	0.80764
390	0.947917	1	1	0.958333	0.75	0.71875	0.864407	0.785714	0.723164	0.935484	0.6	0.954545	1	0.907143	0.955224	0.989474	0.839582	0.824929
391	0.916667	0.970588	0.933333	0.958333	0.705882	0.757812	0.881356	0.797619	0.694915	0.935484	0.68	0.954545	0.9375	0.878571	0.970149	0.989474	0.835222	0.8201
392	0.958333	1	0.733333	0.916667	0.676471	0.71875	0.864407	0.75	0.706215	0.935484	0.68	1	1	0.864286	0.925373	1	0.826504	0.810458
393	0.916667	0.970588	0.733333	0.958333	0.588235	0.6875	0.847458	0.75	0.700565	0.903226	0.613333	0.909091	1	0.885714	0.940299	0.989474	0.808195	0.790515
394	0.947917	0.970588	0.866667	0.958333	0.75	0.679688	0.898305	0.738095	0.683616	1	0.693333	0.954545	0.90625	0.885714	0.970149	0.989474	0.828248	0.812318
395	0.927083	0.970588	0.933333	1	0.75	0.6875	0.745763	0.833333	0.661017	0.870968	0.773333	0.909091	0.96875	0.85	0.955224	0.989474	0.822145	0.805849
396	0.958333	1	0.933333	0.958333	0.764706	0.765625	0.864407	0.797619	0.689266	0.903226	0.72	0.863636	1	0.857143	0.955224	0.989474	0.840453	0.825825
397	0.927083	0.970588	1	0.958333	0.794118	0.742188	0.813559	0.785714	0.757062	0.806452	0.733333	0.863636	0.96875	0.871429	0.970149	0.989474	0.843941	0.829331
398	0.885417	0.970588	0.733333	1	0.632353	0.78125	0.813559	0.72619	0.655367	0.903226	0.64	0.954545	1	0.878571	0.955224	0.989474	0.811683	0.794834
399	0.90625	0.970588	0.666667	1	0.720588	0.710938	0.779661	0.77381	0.689266	0.870968	0.68	0.954545	0.96875	0.864286	0.955224	0.989474	0.816042	0.799012
400	0.9375	0.970588	0.933333	0.958333	0.647059	0.773438	0.79661	0.821429	0.700565	0.870968	0.653333	0.954545	0.96875	0.871429	0.955224	0.989474	0.829119	0.813321
401	0.927083	0.970588	0.933333	1	0.705882	0.726562	0.830508	0.821429	0.751412	0.806452	0.693333	1	0.96875	0.9	0.955224	0.989474	0.842197	0.827431
402	0.916667	0.970588	0.866667	1	0.764706	0.765625	0.847458	0.857143	0.638418	0.870968	0.72	0.954545	0.9375	0.878571	0.970149	0.989474	0.83435	0.819172
403	0.927083	0.970588	0.8	1	0.808824	0.65625	0.847458	0.77381	0.677966	0.935484	0.613333	0.954545	0.96875	0.871429	0.955224	0.989474	0.818657	0.801929
404	0.9375	1	0.866667	0.958333	0.823529	0.65625	0.813559	0.845238	0.706215	0.903226	0.626667	1	0.90625	0.9	0.955224	1	0.832607	0.817092
405	0.90625	1	0.733333	0.958333	0.661765	0.679688	0.830508	0.809524	0.677966	0.967742	0.68	0.909091	0.96875	0.892857	0.970149	0.989474	0.819529	0.802587
406	0.885417	0.970588	0.866667	0.958333	0.720588	0.710938	0.830508	0.833333	0.768362	0.903226	0.746667	0.909091	1	0.878571	0.940299	0.989474	0.841325	0.826486
407	0.895833	1	0.8	0.916667	0.720588	0.6875	0.830508	0.785714	0.717514	0.903226	0.666667	0.909091	0.96875	0.864286	0.940299	0.989474	0.819529	0.80285
408	0.916667	0.970588	0.8	0.958333	0.705882	0.6875	0.830508	0.809524	0.689266	0.870968	0.613333	0.909091	0.96875	0.864286	0.970149	0.989474	0.81517	0.797954
409	0.9375	0.970588	0.8	0.916667	0.705882	0.6875	0.762712	0.845238	0.683616	0.903226	0.76	1	1	0.885714	0.970149	0.989474	0.829991	0.814261
410	0.927083	0.970588	0.866667	0.958333	0.779412	0.757812	0.881356	0.845238	0.762712	0.83871	0.653333	1	1	0.878571	0.940299	0.989474	0.850044	0.835915
411	0.916667	0.970588	0.866667	1	0.735294	0.6875	0.830508	0.77381	0.694915	0.870968	0.706667	0.909091	0.96875	0.878571	0.955224	0.989474	0.823888	0.807664
412	0.927083	0.970588	0.8	0.916667	0.779412	0.679688	0.830508	0.797619	0.638418	0.870968	0.666667	0.954545	1	0.871429	0.970149	0.989474	0.816042	0.799005
413	0.927083	0.970588	1	0.958333	0.705882	0.75	0.745763	0.833333	0.689266	0.870968	0.693333	1	0.96875	0.857143	0.955224	0.989474	0.828248	0.8124
414	0.885417	0.970588	0.866667	1	0.720588	0.71875	0.864407	0.761905	0.649718	0.83871	0.786667	0.954545	1	0.885714	0.985075	0.989474	0.826504	0.810679
415	0.90625	0.970588	0.933333	1	0.720588	0.710938	0.779661	0.809524	0.728814	0.967742	0.68	0.954545	0.96875	0.871429	0.955224	0.989474	0.831735	0.815889
416	0.9375	0.970588	0.933333	0.916667	0.647059	0.695312	0.864407	0.821429	0.689266	0.870968	0.626667	0.954545	0.9375	0.85	0.940299	0.989474	0.81517	0.797903
417	0.927083	0.970588	0.866667	0.916667	0.794118	0.625	0.830508	0.833333	0.666667	0.806452	0.786667	1	0.9375	0.857143	0.925373	0.989474	0.819529	0.80276
418	0.916667	0.970588	0.8	0.833333	0.647059	0.695312	0.881356	0.833333	0.683616	0.903226	0.653333	1	1	0.878571	0.925373	0.989474	0.818657	0.802158
419	0.947917	1	0.933333	1	0.647059	0.671875	0.779661	0.833333	0.59322	0.870968	0.613333	0.954545	1	0.857143	0.955224	0.989474	0.800349	0.782938
420	0.90625	0.970588	0.933333	0.958333	0.602941	0.703125	0.79661	0.75	0.694915	0.870968	0.706667	0.954545	1	0.9	0.955224	0.989474	0.817786	0.800831
421	0.958333	0.970588	0.933333	0.916667	0.720588	0.703125	0.881356	0.857143	0.723164	0.935484	0.666667	0.909091	0.96875	0.857143	0.940299	0.989474	0.836094	0.820836
422	0.9375	0.970588	0.933333	0.833333	0.75	0.679688	0.728814	0.809524	0.689266	0.870968	0.68	1	0.9375	0.885714	0.925373	0.989474	0.817786	0.80073
423	0.947917	0.970588	0.8	0.916667	0.735294	0.679688	0.830508	0.797619	0.706215	0.806452	0.68	0.909091	0.9375	0.864286	0.940299	0.989474	0.819529	0.802829
424	0.916667	0.970588	1	0.958333	0.691176	0.617188	0.762712	0.785714	0.683616	0.870968	0.786667	0.954545	1	0.864286	0.955224	0.989474	0.81517	0.798059
425	0.9375	0.970588	0.933333	0.958333	0.676471	0.679688	0.79661	0.77381	0.723164	0.903226	0.653333	1	1	0.885714	0.910448	0.989474	0.822145	0.805291
426	0.927083	0.970588	1	0.958333	0.720588	0.671875	0.898305	0.77381	0.644068	0.870968	0.653333	0.954545	0.96875	0.871429	0.925373	0.989474	0.813426	0.79637
427	0.927083	0.970588	0.866667	0.916667	0.735294	0.703125	0.830508	0.821429	0.728814	0.967742	0.8	1	0.96875	0.907143	0.985075	0.989474	0.849172	0.835189
428	0.90625	0.970588	1	0.958333	0.720588	0.796875	0.762712	0.821429	0.700565	0.870968	0.706667	0.954545	1	0.892857	0.940299	0.989474	0.83871	0.824128
429	0.947917	0.970588	0.8	0.958333	0.720588	0.71875	0.830508	0.761905	0.694915	0.935484	0.64	0.954545	0.96875	0.871429	0.955224	0.989474	0.823888	0.807655
430	0.927083	0.970588	1	0.958333	0.647059	0.671875	0.830508	0.833333	0.661017	0.870968	0.72	1	0.96875	0.864286	0.955224	0.989474	0.818657	0.801969
431	0.916667	0.970588	0.733333	0.833333	0.794118	0.703125	0.864407	0.833333	0.751412	0.903226	0.56	1	1	0.871429	0.910448	0.989474	0.829119	0.813139
432	0.947917	0.970588	0.933333	0.958333	0.735294	0.742188	0.830508	0.845238	0.751412	0.903226	0.613333	0.954545	0.9375	0.9	0.940299	0.989474	0.843069	0.828263
433	0.9375	0.970588	0.933333	1	0.705882	0.75	0.79661	0.821429	0.672316	0.83871	0.706667	0.909091	1	0.871429	0.955224	0.989474	0.829119	0.813314
434	0.9375	1	0.866667	0.958333	0.720588	0.726562	0.79661	0.797619	0.757062	0.903226	0.693333	0.954545	1	0.892857	0.940299	0.989474	0.841325	0.826545
435	0.9375	0.970588	0.933333	1	0.705882	0.71875	0.745763	0.738095	0.740113	0.806452	0.64	0.954545	0.9375	0.864286	0.970149	0.989474	0.821273	0.804494
436	0.958333	0.970588	1	0.916667	0.764706	0.703125	0.779661	0.845238	0.683616	0.967742	0.626667	1	0.9375	0.871429	0.955224	0.989474	0.829119	0.813207
437	0.947917	0.970588	0.933333	0.916667	0.617647	0.640625	0.813559	0.761905	0.717514	0.903226	0.706667	0.909091	1	0.871429	0.970149	0.989474	0.816914	0.800021
438	0.958333	0.970588	0.733333	0.833333	0.705882	0.671875	0.830508	0.845238	0.717514	0.806452	0.666667	0.954545	0.96875	0.864286	0.925373	0.989474	0.820401	0.803491
439	0.916667	0.970588	0.933333	1	0.661765	0.75	0.745763	0.833333	0.751412	0.935484	0.693333	0.954545	1	0.85	0.955224	0.989474	0.835222	0.819928
440	0.96875	0.970588	0.733333	0.916667	0.764706	0.71875	0.847458	0.797619	0.638418	0.870968	0.786667	1	1	0.864286	0.955224	1	0.830863	0.815542
441	0.927083	0.970588	0.733333	0.958333	0.808824	0.65625	0.79661	0.833333	0.672316	0.83871	0.746667	0.954545	0.96875	0.892857	0.940299	0.989474	0.825632	0.809155
442	0.947917	0.970588	0.933333	0.916667	0.764706	0.703125	0.745763	0.821429	0.677966	0.935484	0.666667	0.909091	1	0.864286	0.940299	0.989474	0.823017	0.806601
443	0.927083	0.970588	0.866667	1	0.691176	0.765625	0.813559	0.857143	0.762712	0.967742	0.733333	1	0.9375	0.85	0.940299	0.989474	0.847428	0.833124
444	0.90625	1	0.8	0.916667	0.691176	0.71875	0.745763	0.833333	0.711864	0.83871	0.64	0.954545	1	0.907143	0.970149	0.989474	0.825632	0.809467
445	0.90625	0.970588	0.933333	0.958333	0.617647	0.742188	0.813559	0.702381	0.723164	0.870968	0.746667	0.909091	0.96875	0.857143	0.955224	0.989474	0.820401	0.803636
446	0.947917	0.970588	0.866667	0.916667	0.735294	0.75	0.830508	0.833333	0.689266	0.806452	0.613333	1	1	0.85	0.955224	0.989474	0.826504	0.81057
447	0.927083	0.970588	0.8	1	0.691176	0.695312	0.847458	0.845238	0.706215	0.903226	0.693333	1	1	0.871429	0.970149	0.989474	0.832607	0.817424
448	0.927083	0.970588	0.8	1	0.647059	0.695312	0.864407	0.761905	0.677966	0.903226	0.6	0.954545	0.96875	0.871429	0.970149	1	0.813426	0.796026
449	0.9375	0.970588	0.933333	0.958333	0.720588	0.6875	0.762712	0.785714	0.661017	0.967742	0.76	0.954545	0.96875	0.878571	0.955224	0.989474	0.823888	0.807707
450	0.947917	0.970588	0.8	0.958333	0.705882	0.789062	0.762712	0.845238	0.711864	0.83871	0.746667	1	0.96875	0.864286	0.955224	0.989474	0.840453	0.82588
451	0.916667	0.970588	0.933333	0.916667	0.735294	0.671875	0.762712	0.821429	0.694915	0.903226	0.746667	1	1	0.885714	0.940299	0.989474	0.827376	0.811358
452	0.9375	0.970588	0.866667	0.916667	0.661765	0.75	0.881356	0.821429	0.723164	0.870968	0.613333	0.954545	0.96875	0.878571	0.955224	0.989474	0.831735	0.816025
453	0.9375	1	0.733333	0.875	0.735294	0.703125	0.898305	0.809524	0.711864	0.83871	0.706667	1	1	0.864286	0.955224	0.989474	0.832607	0.817095
454	0.947917	0.970588	0.866667	0.958333	0.838235	0.71875	0.779661	0.833333	0.689266	0.903226	0.693333	1	0.96875	0.857143	0.880597	0.989474	0.830863	0.8155
455	0.958333	0.970588	0.866667	0.958333	0.661765	0.742188	0.847458	0.809524	0.649718	0.935484	0.693333	1	0.9375	0.864286	0.940299	0.989474	0.823888	0.807856
456	0.9375	0.970588	0.866667	0.958333	0.779412	0.726562	0.830508	0.738095	0.689266	0.83871	0.706667	1	0.96875	0.85	0.925373	0.989474	0.823888	0.807804
457	0.9375	1	0.933333	1	0.735294	0.757812	0.847458	0.761905	0.683616	0.806452	0.733333	1	0.96875	0.9	0.940299	0.989474	0.836966	0.82202
458	0.958333	0.970588	0.8	1	0.75	0.726562	0.881356	0.869048	0.728814	0.741935	0.64	0.954545	0.9375	0.885714	0.955224	0.989474	0.839582	0.824635
459	0.927083	0.970588	0.866667	0.958333	0.808824	0.710938	0.864407	0.797619	0.672316	0.903226	0.76	1	1	0.85	0.955224	1	0.835222	0.819957
460	0.927083	0.970588	0.933333	0.958333	0.735294	0.679688	0.830508	0.714286	0.683616	0.870968	0.573333	0.954545	0.96875	0.878571	0.940299	0.989474	0.809067	0.7914
461	0.9375	0.970588	0.866667	1	0.75	0.632812	0.762712	0.821429	0.677966	0.967742	0.773333	1	0.9375	0.9	0.970149	0.989474	0.829119	0.813144
462	0.9375	0.970588	0.933333	0.916667	0.720588	0.679688	0.881356	0.833333	0.694915	0.903226	0.64	0.954545	1	0.864286	0.970149	0.989474	0.827376	0.811551
463	0.9375	1	0.933333	1	0.691176	0.773438	0.898305	0.761905	0.694915	0.903226	0.746667	0.954545	1	0.885714	0.970149	0.989474	0.843941	0.829823
464	0.927083	0.970588	0.933333	1	0.705882	0.609375	0.779661	0.761905	0.655367	0.83871	0.626667	0.909091	0.96875	0.907143	0.970149	0.989474	0.803836	0.785448
465	0.9375	0.970588	0.666667	1	0.808824	0.703125	0.745763	0.797619	0.745763	0.870968	0.76	0.954545	0.96875	0.878571	0.940299	0.989474	0.837838	0.822717
466	0.9375	0.970588	0.866667	1	0.823529	0.648438	0.745763	0.821429	0.723164	0.935484	0.6	0.954545	0.9375	0.871429	0.955224	1	0.82476	0.808438
467	0.9375	0.970588	0.8	1	0.676471	0.726562	0.830508	0.77381	0.706215	0.870968	0.666667	1	1	0.857143	0.955224	0.989474	0.82476	0.808482
468	0.947917	0.970588	0.866667	0.958333	0.617647	0.71875	0.915254	0.833333	0.728814	0.741935	0.653333	0.954545	0.96875	0.871429	0.925373	0.989474	0.827376	0.811241
469	0.927083	0.970588	0.8	1	0.764706	0.71875	0.864407	0.75	0.774011	0.870968	0.693333	0.909091	0.96875	0.871429	0.940299	0.989474	0.83871	0.823403
470	0.947917	0.970588	0.933333	0.958333	0.705882	0.695312	0.915254	0.714286	0.740113	0.935484	0.733333	0.954545	1	0.857143	0.970149	0.989474	0.836094	0.820886
471	0.916667	0.970588	0.8	0.875	0.764706	0.757812	0.864407	0.761905	0.728814	0.83871	0.666667	1	0.96875	0.857143	0.955224	0.989474	0.831735	0.816121
472	0.927083	0.970588	1	0.958333	0.779412	0.671875	0.79661	0.761905	0.694915	0.870968	0.72	0.954545	0.96875	0.878571	0.955224	0.989474	0.825632	0.80945
473	0.916667	1	0.933333	0.958333	0.676471	0.65625	0.779661	0.797619	0.723164	0.935484	0.76	0.909091	0.96875	0.892857	0.925373	0.989474	0.826504	0.810634
474	0.916667	0.970588	0.933333	0.958333	0.647059	0.703125	0.762712	0.809524	0.717514	0.870968	0.666667	1	1	0.857143	0.955224	0.989474	0.820401	0.803722
475	0.947917	0.970588	0.866667	0.958333	0.808824	0.773438	0.881356	0.809524	0.706215	0.83871	0.706667	0.863636	0.96875	0.864286	0.970149	0.989474	0.843941	0.829585
476	0.9375	0.970588	0.733333	0.958333	0.764706	0.679688	0.745763	0.797619	0.734463	0.83871	0.746667	0.954545	0.96875	0.864286	0.925373	0.989474	0.826504	0.810137
477	0.895833	0.970588	0.866667	0.958333	0.808824	0.765625	0.745763	0.785714	0.779661	0.870968	0.68	0.954545	0.96875	0.871429	0.940299	0.989474	0.841325	0.826423
478	0.9375	0.970588	0.866667	0.875	0.705882	0.625	0.830508	0.785714	0.774011	0.774194	0.8	0.909091	1	0.871429	0.970149	1	0.832607	0.816845
479	0.9375	0.970588	0.866667	0.958333	0.691176	0.710938	0.881356	0.761905	0.655367	0.870968	0.666667	1	0.96875	0.892857	0.955224	0.989474	0.821273	0.804898
480	0.927083	0.970588	0.866667	1	0.720588	0.765625	0.79661	0.797619	0.79096	0.967742	0.68	1	0.96875	0.878571	0.955224	0.989474	0.850044	0.836007
481	0.916667	0.970588	0.733333	0.958333	0.75	0.609375	0.813559	0.785714	0.717514	0.935484	0.653333	0.954545	1	0.842857	0.940299	0.989474	0.811683	0.79387
482	0.96875	0.970588	0.866667	0.916667	0.676471	0.71875	0.864407	0.833333	0.723164	0.806452	0.733333	0.954545	1	0.878571	0.940299	0.989474	0.837838	0.822574
483	0.927083	1	0.933333	0.916667	0.705882	0.6875	0.830508	0.821429	0.666667	0.870968	0.68	1	0.96875	0.871429	0.955224	0.989474	0.821273	0.804936
484	0.947917	0.970588	1	0.958333	0.764706	0.65625	0.830508	0.75	0.706215	0.83871	0.8	0.954545	1	0.907143	0.955224	0.989474	0.836094	0.820826
485	0.947917	1	0.8	1	0.75	0.632812	0.813559	0.785714	0.661017	0.774194	0.786667	0.954545	0.96875	0.878571	0.940299	0.989474	0.818657	0.802136
486	0.90625	0.970588	0.8	0.958333	0.808824	0.695312	0.79661	0.785714	0.728814	0.83871	0.693333	1	1	0.885714	0.955224	0.989474	0.832607	0.816928
487	0.947917	0.970588	0.8	0.958333	0.794118	0.710938	0.864407	0.821429	0.717514	0.903226	0.733333	0.954545	1	0.871429	0.955224	0.989474	0.843069	0.828495
488	0.927083	1	1	0.958333	0.632353	0.664062	0.813559	0.690476	0.666667	0.870968	0.706667	1	0.96875	0.885714	0.955224	0.989474	0.809067	0.791257
489	0.9375	0.970588	0.733333	0.916667	0.691176	0.648438	0.847458	0.761905	0.677966	0.903226	0.693333	1	1	0.885714	0.970149	0.989474	0.816914	0.799837
490	0.927083	0.970588	0.8	0.958333	0.735294	0.726562	0.79661	0.761905	0.723164	0.870968	0.72	0.954545	1	0.871429	0.925373	0.989474	0.829119	0.813135
491	0.9375	0.970588	0.8	0.958333	0.720588	0.65625	0.881356	0.833333	0.655367	0.774194	0.773333	1	1	0.885714	0.970149	0.989474	0.826504	0.810153
492	0.947917	0.970588	0.8	1	0.75	0.6875	0.847458	0.785714	0.632768	0.967742	0.653333	1	1	0.892857	0.925373	1	0.821273	0.805104
493	0.90625	1	0.933333	0.958333	0.647059	0.6875	0.847458	0.880952	0.610169	0.935484	0.64	1	0.96875	0.864286	0.955224	0.989474	0.811683	0.794415
494	0.947917	0.970588	0.933333	0.916667	0.764706	0.710938	0.813559	0.761905	0.644068	0.83871	0.666667	0.909091	0.96875	0.892857	0.910448	0.989474	0.816042	0.799205
495	0.927083	0.970588	0.866667	1	0.735294	0.75	0.779661	0.809524	0.672316	0.774194	0.68	1	1	0.871429	0.955224	0.989474	0.825632	0.809482
496	0.927083	0.970588	0.8	1	0.691176	0.679688	0.830508	0.785714	0.734463	0.935484	0.653333	0.954545	1	0.885714	0.970149	0.989474	0.829119	0.813115
497	0.927083	0.970588	0.933333	0.958333	0.705882	0.726562	0.813559	0.785714	0.689266	0.806452	0.6	0.863636	0.9375	0.878571	0.955224	0.989474	0.816042	0.799208
498	0.947917	1	0.866667	0.916667	0.705882	0.6875	0.830508	0.821429	0.661017	0.903226	0.653333	1	1	0.871429	0.955224	0.989474	0.821273	0.804691
499	0.9375	0.970588	0.933333	0.916667	0.720588	0.664062	0.830508	0.797619	0.711864	0.83871	0.653333	1	1	0.892857	0.940299	0.989474	0.82476	0.808221
500	0.958333	0.970588	0.666667	1	0.676471	0.726562	0.847458	0.77381	0.723164	0.903226	0.666667	1	0.9375	0.878571	0.955224	0.989474	0.829991	0.814205
501	0.9375	0.970588	0.666667	1	0.764706	0.703125	0.79661	0.761905	0.655367	0.903226	0.706667	1	1	0.85	0.940299	0.989474	0.816914	0.800334
502	0.864583	1	0.866667	0.958333	0.705882	0.734375	0.728814	0.761905	0.672316	0.83871	0.76	0.954545	0.96875	0.85	0.940299	0.989474	0.812554	0.795331
503	0.916667	0.970588	0.8	0.958333	0.75	0.734375	0.813559	0.797619	0.694915	0.870968	0.693333	0.909091	0.96875	0.864286	0.955224	0.989474	0.826504	0.810358
504	0.90625	0.970588	0.8	0.958333	0.779412	0.726562	0.847458	0.821429	0.706215	0.870968	0.586667	1	1	0.878571	0.955224	1	0.829991	0.814411
505	0.927083	1	0.933333	0.958333	0.735294	0.695312	0.79661	0.821429	0.728814	0.903226	0.693333	0.954545	0.96875	0.885714	0.970149	0.989474	0.836094	0.820695
506	0.9375	0.970588	0.933333	0.958333	0.705882	0.703125	0.745763	0.797619	0.700565	0.83871	0.666667	1	1	0.9	0.970149	0.989474	0.826504	0.810414
507	0.916667	0.970588	1	0.958333	0.75	0.632812	0.830508	0.77381	0.661017	0.903226	0.746667	0.909091	0.96875	0.878571	0.970149	0.989474	0.818657	0.801925
508	0.916667	0.970588	0.933333	1	0.794118	0.640625	0.711864	0.77381	0.779661	0.83871	0.773333	0.909091	0.96875	0.864286	0.970149	0.989474	0.832607	0.816807
509	0.947917	0.970588	0.933333	0.833333	0.691176	0.71875	0.847458	0.833333	0.751412	0.903226	0.666667	0.954545	0.96875	0.9	0.955224	0.989474	0.840453	0.825529
510	0.90625	0.970588	0.933333	1	0.617647	0.679688	0.79661	0.77381	0.723164	0.903226	0.706667	0.954545	1	0.871429	0.970149	0.989474	0.821273	0.804565
511	0.916667	0.970588	1	0.916667	0.647059	0.679688	0.813559	0.690476	0.711864	0.870968	0.64	0.954545	0.96875	0.892857	0.925373	0.989474	0.809939	0.791874
512	0.9375	1	1	1	0.75	0.671875	0.745763	0.797619	0.666667	0.806452	0.68	0.909091	1	0.892857	0.940299	0.989474	0.818657	0.801853
513	0.916667	0.970588	0.933333	0.958333	0.676471	0.6875	0.745763	0.690476	0.717514	0.935484	0.693333	0.954545	1	0.871429	0.955224	0.989474	0.81517	0.798025
514	0.927083	1	0.733333	0.916667	0.735294	0.6875	0.847458	0.738095	0.717514	0.935484	0.706667	1	1	0.878571	0.985075	0.989474	0.829991	0.814052
515	0.947917	0.970588	0.8	0.958333	0.647059	0.671875	0.711864	0.785714	0.649718	0.870968	0.866667	0.954545	1	0.885714	0.940299	0.989474	0.817786	0.800935
516	0.90625	0.970588	0.866667	0.833333	0.676471	0.65625	0.813559	0.77381	0.677966	0.870968	0.653333	1	1	0.871429	0.925373	0.989474	0.80558	0.787449
517	0.947917	0.970588	0.6	0.916667	0.75	0.710938	0.830508	0.738095	0.683616	0.806452	0.72	1	1	0.878571	0.925373	0.989474	0.820401	0.803649
518	0.916667	0.970588	0.733333	0.958333	0.735294	0.710938	0.864407	0.77381	0.694915	0.774194	0.746667	1	0.96875	0.885714	0.970149	0.989474	0.829119	0.813261
519	0.9375	1	0.933333	1	0.720588	0.679688	0.847458	0.678571	0.683616	0.870968	0.6	0.909091	1	0.885714	0.985075	0.989474	0.814298	0.797283
520	0.947917	1	0.866667	1	0.661765	0.695312	0.79661	0.821429	0.711864	0.935484	0.706667	1	1	0.907143	0.985075	0.989474	0.837838	0.822773
521	0.916667	1	0.933333	0.916667	0.676471	0.695312	0.864407	0.77381	0.717514	0.967742	0.64	0.954545	1	0.878571	0.970149	0.989474	0.827376	0.811372
522	0.927083	0.970588	0.733333	0.958333	0.779412	0.71875	0.728814	0.797619	0.638418	0.935484	0.706667	0.954545	0.96875	0.892857	0.985075	0.989474	0.822145	0.805987
523	0.90625	1	0.866667	1	0.779412	0.679688	0.79661	0.833333	0.683616	0.870968	0.68	0.909091	1	0.871429	0.970149	0.989474	0.825632	0.809619
524	0.947917	0.970588	0.933333	1	0.720588	0.648438	0.779661	0.797619	0.661017	0.870968	0.786667	0.954545	1	0.9	0.970149	0.989474	0.826504	0.810448
525	0.916667	1	0.8	1	0.764706	0.703125	0.864407	0.785714	0.723164	0.806452	0.666667	0.954545	1	0.871429	0.955224	0.989474	0.830863	0.815318
526	0.90625	0.970588	0.866667	0.958333	0.720588	0.695312	0.830508	0.821429	0.700565	0.870968	0.653333	0.954545	1	0.878571	1	0.989474	0.827376	0.811455
527	0.90625	1	0.866667	0.916667	0.661765	0.71875	0.79661	0.77381	0.672316	0.903226	0.626667	1	1	0.885714	0.970149	1	0.816914	0.800022
528	0.916667	0.970588	0.866667	1	0.676471	0.679688	0.881356	0.809524	0.672316	0.903226	0.653333	1	0.96875	0.871429	0.955224	0.989474	0.819529	0.802792
529	0.916667	1	0.866667	0.958333	0.75	0.695312	0.762712	0.845238	0.700565	0.903226	0.573333	0.954545	1	0.892857	0.955224	0.989474	0.823888	0.807405
530	0.916667	0.970588	0.8	0.916667	0.661765	0.59375	0.830508	0.809524	0.666667	0.935484	0.613333	0.954545	0.96875	0.907143	0.970149	0.989474	0.80558	0.787804
531	0.90625	0.970588	0.8	0.958333	0.676471	0.695312	0.830508	0.857143	0.672316	0.870968	0.72	1	1	0.878571	0.970149	0.989474	0.825632	0.809432
532	0.916667	0.970588	0.8	0.875	0.705882	0.71875	0.881356	0.845238	0.689266	0.83871	0.68	1	1	0.907143	0.970149	0.989474	0.833479	0.818084
533	0.958333	0.970588	0.866667	0.958333	0.735294	0.632812	0.779661	0.869048	0.621469	0.870968	0.706667	1	1	0.878571	0.970149	0.989474	0.816914	0.800243
534	0.947917	0.970588	0.733333	0.958333	0.676471	0.703125	0.79661	0.797619	0.717514	0.903226	0.733333	1	1	0.842857	0.970149	0.989474	0.827376	0.811144
535	0.90625	1	0.933333	1	0.691176	0.703125	0.79661	0.738095	0.677966	0.870968	0.666667	0.954545	1	0.885714	0.970149	0.989474	0.817786	0.801125
536	0.9375	0.970588	0.733333	1	0.735294	0.679688	0.79661	0.75	0.694915	0.935484	0.613333	0.909091	1	0.878571	0.985075	0.989474	0.817786	0.800815
537	0.885417	0.970588	0.933333	0.916667	0.779412	0.734375	0.830508	0.809524	0.694915	0.935484	0.76	0.954545	0.9375	0.878571	0.985075	0.989474	0.837838	0.822706
538	0.875	1	0.8	1	0.735294	0.65625	0.728814	0.845238	0.711864	0.870968	0.693333	1	0.96875	0.9	0.985075	1	0.825632	0.809393
539	0.9375	1	0.733333	0.958333	0.779412	0.773438	0.728814	0.761905	0.661017	0.935484	0.653333	0.954545	0.96875	0.892857	0.970149	0.989474	0.826504	0.810721
540	0.90625	1	0.866667	0.916667	0.705882	0.671875	0.762712	0.821429	0.661017	0.83871	0.653333	0.909091	0.96875	0.892857	1	0.989474	0.813426	0.796093
541	0.916667	0.970588	0.866667	1	0.75	0.78125	0.745763	0.797619	0.734463	0.967742	0.693333	1	1	0.878571	0.955224	0.989474	0.843069	0.828615
542	0.90625	1	0.8	0.958333	0.720588	0.710938	0.79661	0.75	0.700565	0.870968	0.693333	0.954545	1	0.885714	0.985075	0.989474	0.82476	0.808574
543	0.9375	1	0.8	0.875	0.764706	0.703125	0.864407	0.797619	0.632768	0.83871	0.68	1	0.96875	0.892857	0.985075	0.989474	0.823017	0.806874
544	0.927083	1	0.733333	1	0.764706	0.617188	0.79661	0.72619	0.694915	0.967742	0.653333	0.909091	1	0.878571	0.985075	0.989474	0.814298	0.797208
545	0.947917	1	0.933333	0.958333	0.647059	0.710938	0.728814	0.821429	0.694915	0.935484	0.653333	1	1	0.9	0.985075	0.989474	0.828248	0.812547
546	0.854167	1	1	0.916667	0.735294	0.65625	0.728814	0.833333	0.689266	0.903226	0.68	0.954545	1	0.9	0.970149	0.989474	0.818657	0.801924
547	0.947917	1	0.866667	0.958333	0.647059	0.710938	0.864407	0.785714	0.740113	0.870968	0.693333	1	1	0.921429	0.970149	0.989474	0.841325	0.82641
548	0.9375	0.970588	1	0.916667	0.647059	0.609375	0.79661	0.821429	0.677966	0.83871	0.666667	1	0.96875	0.878571	0.970149	0.989474	0.809939	0.792386
549	0.96875	0.970588	0.733333	0.958333	0.705882	0.695312	0.779661	0.714286	0.711864	0.870968	0.586667	1	0.96875	0.871429	0.985075	0.989474	0.81517	0.797956
550	0.9375	1	0.933333	0.958333	0.735294	0.679688	0.779661	0.809524	0.666667	0.806452	0.72	1	0.96875	0.885714	0.955224	0.989474	0.823017	0.806651
551	0.875	0.970588	0.866667	1	0.794118	0.648438	0.79661	0.833333	0.706215	0.870968	0.626667	1	1	0.871429	1	0.989474	0.823017	0.806772
552	0.90625	1	0.933333	1	0.705882	0.710938	0.830508	0.785714	0.706215	0.903226	0.653333	1	1	0.885714	0.970149	0.989474	0.829991	0.814238
553	0.916667	0.970588	0.733333	0.916667	0.676471	0.671875	0.813559	0.761905	0.666667	0.774194	0.68	0.954545	1	0.892857	0.940299	0.989474	0.807323	0.789182
554	0.895833	0.970588	0.866667	0.958333	0.705882	0.742188	0.762712	0.857143	0.672316	0.774194	0.733333	1	1	0.885714	0.970149	0.989474	0.828248	0.812535
555	0.916667	1	0.8	0.875	0.691176	0.710938	0.762712	0.761905	0.694915	0.870968	0.653333	1	1	0.878571	0.985075	0.989474	0.817786	0.800912
556	0.90625	0.970588	0.733333	0.958333	0.808824	0.695312	0.847458	0.797619	0.700565	0.83871	0.666667	1	1	0.892857	0.955224	0.989474	0.829991	0.814032
557	0.895833	1	0.733333	0.916667	0.720588	0.65625	0.864407	0.785714	0.59887	0.903226	0.626667	1	0.9375	0.892857	0.970149	0.989474	0.802092	0.784332
558	0.916667	0.970588	0.733333	1	0.617647	0.65625	0.79661	0.785714	0.689266	0.806452	0.72	1	0.9375	0.885714	0.985075	0.989474	0.812554	0.79521
559	0.916667	0.970588	0.866667	1	0.705882	0.679688	0.79661	0.77381	0.717514	0.903226	0.56	1	1	0.878571	0.970149	0.989474	0.817786	0.800942
560	0.864583	1	0.8	1	0.75	0.734375	0.847458	0.77381	0.677966	0.935484	0.76	0.909091	1	0.864286	0.940299	0.989474	0.827376	0.811471
561	0.927083	0.970588	0.8	0.916667	0.735294	0.71875	0.694915	0.869048	0.689266	0.83871	0.693333	0.954545	0.9375	0.885714	0.955224	0.989474	0.823888	0.80756
562	0.90625	1	0.866667	0.958333	0.632353	0.625	0.762712	0.761905	0.711864	0.935484	0.706667	0.954545	0.9375	0.878571	0.940299	1	0.809939	0.791979
563	0.885417	0.970588	0.933333	0.958333	0.720588	0.679688	0.813559	0.809524	0.717514	0.903226	0.76	1	1	0.878571	0.985075	0.989474	0.833479	0.817992
564	0.895833	1	0.8	0.958333	0.808824	0.632812	0.779661	0.761905	0.615819	0.903226	0.76	1	1	0.878571	0.970149	0.989474	0.811683	0.79467
565	0.916667	0.970588	0.8	0.916667	0.632353	0.703125	0.745763	0.738095	0.706215	0.83871	0.706667	0.954545	1	0.878571	0.970149	0.989474	0.813426	0.79596
566	0.9375	1	0.866667	1	0.617647	0.6875	0.745763	0.833333	0.683616	0.870968	0.666667	1	1	0.878571	0.970149	0.989474	0.818657	0.802021
567	0.916667	0.970588	0.8	0.958333	0.691176	0.65625	0.79661	0.761905	0.638418	0.903226	0.72	1	0.96875	0.878571	0.970149	0.989474	0.809067	0.791666
568	0.947917	0.970588	0.8	1	0.75	0.65625	0.79661	0.797619	0.711864	0.903226	0.773333	0.954545	1	0.892857	0.940299	0.989474	0.833479	0.817755
569	0.927083	1	0.933333	1	0.779412	0.726562	0.830508	0.892857	0.677966	0.870968	0.68	1	1	0.857143	0.970149	0.989474	0.83871	0.823965
570	0.9375	0.970588	1	0.958333	0.720588	0.703125	0.864407	0.77381	0.689266	0.903226	0.706667	0.954545	1	0.871429	0.970149	0.989474	0.830863	0.815222
571	0.875	0.970588	0.866667	0.958333	0.720588	0.71875	0.898305	0.797619	0.661017	0.870968	0.68	1	1	0.864286	0.955224	0.989474	0.821273	0.804973
572	0.895833	0.970588	0.866667	0.875	0.720588	0.734375	0.830508	0.880952	0.734463	0.870968	0.733333	1	1	0.9	0.985075	0.989474	0.846556	0.832187
573	0.96875	0.970588	1	0.916667	0.676471	0.75	0.813559	0.785714	0.706215	0.935484	0.733333	1	0.9375	0.9	0.970149	0.989474	0.841325	0.826711
574	0.927083	0.970588	0.933333	0.958333	0.676471	0.742188	0.830508	0.833333	0.706215	0.870968	0.733333	1	1	0.892857	1	0.989474	0.842197	0.827479
575	0.916667	1	0.933333	0.875	0.720588	0.6875	0.830508	0.821429	0.683616	0.903226	0.68	1	0.96875	0.878571	0.940299	0.989474	0.823888	0.807652
576	0.90625	0.970588	0.8	0.958333	0.705882	0.664062	0.79661	0.809524	0.638418	0.83871	0.72	1	1	0.878571	0.970149	0.989474	0.812554	0.795215
577	0.916667	0.970588	0.933333	0.958333	0.661765	0.679688	0.864407	0.797619	0.683616	0.903226	0.666667	0.954545	0.96875	0.914286	0.970149	0.989474	0.82476	0.808429
578	0.895833	1	0.8	0.958333	0.647059	0.734375	0.779661	0.821429	0.644068	0.935484	0.626667	0.909091	1	0.885714	0.985075	0.989474	0.814298	0.797475
579	0.916667	0.970588	0.8	0.958333	0.75	0.757812	0.813559	0.821429	0.661017	0.935484	0.653333	1	0.96875	0.892857	0.925373	0.989474	0.828248	0.812162
580	0.927083	1	0.8	0.958333	0.75	0.726562	0.915254	0.833333	0.672316	0.903226	0.613333	1	1	0.864286	0.970149	0.989474	0.830863	0.815379
581	0.895833	0.970588	0.733333	0.916667	0.676471	0.648438	0.79661	0.809524	0.694915	0.903226	0.706667	0.954545	1	0.864286	0.970149	0.989474	0.813426	0.796117
582	0.927083	0.970588	0.933333	0.958333	0.735294	0.65625	0.813559	0.75	0.638418	0.806452	0.626667	0.954545	1	0.892857	0.970149	0.989474	0.807323	0.789589
583	0.9375	1	0.8	0.958333	0.735294	0.648438	0.898305	0.77381	0.694915	0.870968	0.666667	1	1	0.878571	0.955224	0.989474	0.823888	0.807483
584	0.927083	0.970588	0.866667	1	0.705882	0.625	0.881356	0.690476	0.661017	0.806452	0.733333	1	0.96875	0.871429	0.970149	0.989474	0.809067	0.791488
585	0.947917	0.970588	0.933333	0.958333	0.794118	0.679688	0.813559	0.869048	0.717514	0.870968	0.64	0.954545	0.9375	0.885714	0.985075	0.989474	0.836966	0.822009
586	0.916667	1	0.8	1	0.720588	0.625	0.864407	0.761905	0.655367	0.903226	0.733333	1	0.96875	0.885714	0.985075	0.989474	0.817786	0.801331
587	0.9375	1	0.866667	0.958333	0.720588	0.664062	0.830508	0.797619	0.666667	0.967742	0.653333	1	1	0.892857	0.970149	0.989474	0.823888	0.807533
588	0.916667	0.970588	0.733333	1	0.764706	0.703125	0.79661	0.77381	0.661017	0.806452	0.733333	0.909091	0.96875	0.907143	0.970149	0.989474	0.823017	0.807079
589	0.927083	0.970588	1	0.958333	0.764706	0.6875	0.864407	0.892857	0.677966	0.741935	0.653333	0.954545	1	0.878571	0.985075	0.989474	0.831735	0.815904
590	0.947917	1	0.933333	0.958333	0.794118	0.710938	0.79661	0.809524	0.683616	0.870968	0.693333	1	1	0.885714	0.955224	0.989474	0.835222	0.820081
591	0.927083	1	0.866667	0.958333	0.75	0.640625	0.915254	0.77381	0.677966	0.935484	0.653333	0.954545	1	0.885714	0.970149	0.989474	0.823888	0.807776
592	0.947917	0.970588	0.866667	0.958333	0.691176	0.695312	0.745763	0.797619	0.666667	0.903226	0.693333	1	0.90625	0.892857	0.970149	0.989474	0.819529	0.802707
593	0.958333	0.970588	0.866667	1	0.661765	0.703125	0.79661	0.880952	0.706215	0.935484	0.653333	0.954545	1	0.871429	0.985075	0.989474	0.833479	0.818118
594	0.927083	0.970588	0.933333	0.916667	0.676471	0.679688	0.79661	0.857143	0.655367	0.935484	0.613333	1	0.96875	0.878571	0.970149	0.989474	0.816042	0.799105
595	0.875	1	0.933333	1	0.676471	0.679688	0.779661	0.833333	0.723164	0.967742	0.626667	0.954545	0.96875	0.892857	0.955224	0.989474	0.823888	0.807524
596	0.958333	1	0.8	0.958333	0.75	0.679688	0.881356	0.797619	0.615819	0.870968	0.786667	1	0.96875	0.878571	0.955224	0.989474	0.825632	0.810249
597	0.895833	0.970588	0.8	1	0.705882	0.671875	0.79661	0.797619	0.60452	0.870968	0.72	0.954545	0.96875	0.878571	0.955224	0.989474	0.80558	0.788137
598	0.916667	0.970588	0.933333	0.958333	0.735294	0.71875	0.830508	0.869048	0.706215	0.903226	0.693333	1	1	0.885714	0.955224	0.989474	0.839582	0.824597
599	0.90625	1	0.733333	0.916667	0.691176	0.671875	0.79661	0.904762	0.717514	0.83871	0.68	1	1	0.885714	0.955224	0.989474	0.828248	0.811938
600	0.9375	1	0.866667	1	0.764706	0.71875	0.915254	0.77381	0.683616	0.870968	0.72	0.954545	1	0.9	0.985075	0.989474	0.841325	0.826868
601	0.875	1	0.933333	0.958333	0.720588	0.601562	0.881356	0.797619	0.649718	0.903226	0.586667	0.863636	0.96875	0.914286	0.970149	0.989474	0.80558	0.787716
602	0.90625	1	0.866667	0.916667	0.602941	0.703125	0.779661	0.785714	0.649718	0.903226	0.68	0.954545	1	0.892857	0.970149	0.989474	0.810811	0.79322
603	0.916667	1	0.933333	0.875	0.764706	0.671875	0.830508	0.809524	0.661017	0.935484	0.733333	1	0.96875	0.871429	0.970149	0.989474	0.825632	0.809542
604	0.895833	0.970588	0.866667	0.958333	0.691176	0.695312	0.881356	0.797619	0.706215	0.83871	0.693333	0.954545	1	0.9	0.940299	0.989474	0.827376	0.811291
605	0.90625	1	0.866667	0.958333	0.779412	0.695312	0.830508	0.761905	0.649718	0.870968	0.693333	1	0.96875	0.9	0.955224	0.989474	0.822145	0.806001
606	0.895833	0.970588	0.933333	1	0.720588	0.671875	0.881356	0.77381	0.683616	0.806452	0.706667	1	0.9375	0.892857	0.955224	0.989474	0.822145	0.805319
607	0.9375	0.970588	0.933333	1	0.661765	0.609375	0.881356	0.809524	0.694915	0.935484	0.706667	0.954545	0.96875	0.871429	0.985075	0.989474	0.822145	0.805448
608	0.916667	1	0.933333	1	0.705882	0.640625	0.79661	0.77381	0.694915	0.903226	0.693333	0.909091	0.96875	0.885714	0.940299	0.989474	0.816914	0.799963
609	0.9375	1	0.8	1	0.75	0.734375	0.745763	0.77381	0.711864	0.903226	0.76	1	1	0.864286	0.970149	0.989474	0.836094	0.82106
610	0.927083	1	0.866667	0.958333	0.735294	0.648438	0.745763	0.833333	0.711864	0.806452	0.733333	0.954545	1	0.885714	0.970149	0.989474	0.826504	0.810392
611	0.90625	0.970588	0.733333	1	0.676471	0.617188	0.79661	0.809524	0.711864	0.806452	0.586667	0.954545	1	0.9	0.955224	0.989474	0.808195	0.790096
612	0.927083	1	0.866667	1	0.720588	0.695312	0.847458	0.809524	0.689266	0.935484	0.733333	1	0.9375	0.9	0.970149	0.989474	0.836094	0.821049
613	0.96875	1	0.8	0.958333	0.720588	0.679688	0.728814	0.833333	0.683616	0.774194	0.666667	1	1	0.871429	0.970149	0.989474	0.820401	0.803605
614	0.947917	0.970588	0.933333	0.958333	0.720588	0.671875	0.813559	0.714286	0.638418	0.903226	0.733333	0.909091	1	0.864286	0.940299	0.989474	0.810811	0.79354
615	0.875	1	0.866667	1	0.794118	0.671875	0.79661	0.821429	0.677966	0.870968	0.693333	0.954545	1	0.878571	0.970149	0.989474	0.823888	0.807327
616	0.927083	0.970588	0.866667	0.958333	0.691176	0.703125	0.830508	0.785714	0.672316	0.967742	0.6	0.954545	0.96875	0.871429	0.955224	0.989474	0.816042	0.799331
617	0.9375	0.970588	0.933333	0.916667	0.661765	0.679688	0.864407	0.869048	0.706215	0.967742	0.666667	1	1	0.9	0.970149	0.989474	0.836094	0.821067
618	0.895833	1	0.8	1	0.735294	0.671875	0.762712	0.797619	0.677966	0.83871	0.666667	1	1	0.864286	0.970149	0.989474	0.814298	0.797246
619	0.916667	1	1	1	0.735294	0.695312	0.779661	0.892857	0.689266	0.967742	0.626667	1	1	0.892857	0.985075	0.989474	0.836094	0.82108
620	0.947917	1	0.733333	0.958333	0.764706	0.734375	0.79661	0.809524	0.694915	0.967742	0.68	1	1	0.885714	0.970149	0.989474	0.837838	0.822961
621	0.90625	1	0.866667	0.958333	0.691176	0.679688	0.813559	0.869048	0.706215	0.870968	0.68	0.954545	0.96875	0.878571	0.985075	0.989474	0.828248	0.812348
622	0.927083	0.970588	0.866667	0.958333	0.691176	0.703125	0.779661	0.797619	0.740113	0.903226	0.733333	1	1	0.864286	0.985075	0.989474	0.83435	0.818873
623	0.927083	0.970588	0.733333	0.916667	0.735294	0.664062	0.830508	0.797619	0.60452	0.903226	0.733333	0.954545	0.96875	0.878571	0.970149	0.989474	0.810811	0.793444
624	0.90625	1	0.733333	1	0.705882	0.625	0.864407	0.785714	0.734463	0.903226	0.693333	1	1	0.864286	1	0.989474	0.825632	0.809195
625	0.90625	0.970588	0.933333	0.916667	0.75	0.632812	0.898305	0.809524	0.683616	0.935484	0.68	1	1	0.864286	0.955224	0.989474	0.822145	0.805652
626	0.927083	1	0.8	1	0.794118	0.703125	0.779661	0.857143	0.649718	0.870968	0.586667	1	1	0.871429	0.970149	0.989474	0.821273	0.804828
627	0.90625	1	0.666667	0.958333	0.735294	0.664062	0.830508	0.761905	0.706215	0.83871	0.64	1	1	0.871429	0.970149	0.989474	0.816042	0.798627
628	0.916667	0.970588	0.8	0.958333	0.764706	0.726562	0.779661	0.809524	0.706215	0.83871	0.68	1	1	0.857143	0.970149	0.989474	0.828248	0.812112
629	0.885417	0.970588	0.733333	0.916667	0.735294	0.609375	0.830508	0.833333	0.576271	0.935484	0.613333	1	0.9375	0.878571	0.970149	0.989474	0.792502	0.773523
630	0.9375	1	0.933333	1	0.735294	0.710938	0.79661	0.797619	0.677966	0.870968	0.76	0.954545	0.96875	0.885714	0.985075	0.989474	0.83435	0.819232
631	0.895833	1	0.866667	0.875	0.735294	0.664062	0.762712	0.833333	0.638418	0.870968	0.706667	0.954545	1	0.85	0.970149	0.989474	0.809067	0.791355
632	0.916667	0.970588	0.866667	0.916667	0.735294	0.773438	0.847458	0.761905	0.677966	0.870968	0.746667	0.954545	0.9375	0.885714	0.970149	0.989474	0.833479	0.818279
633	0.90625	1	0.866667	1	0.647059	0.664062	0.847458	0.77381	0.672316	0.870968	0.653333	0.909091	0.9375	0.914286	0.970149	0.989474	0.814298	0.796805
634	0.947917	1	0.866667	0.916667	0.676471	0.679688	0.830508	0.845238	0.694915	0.870968	0.746667	1	1	0.871429	0.970149	0.989474	0.831735	0.816103
635	0.895833	1	0.866667	1	0.588235	0.679688	0.847458	0.75	0.649718	0.870968	0.666667	1	1	0.907143	0.955224	0.989474	0.809067	0.791676
636	0.9375	0.970588	0.933333	0.958333	0.735294	0.664062	0.847458	0.821429	0.672316	0.967742	0.573333	1	1	0.878571	0.970149	0.989474	0.821273	0.804818
637	0.947917	1	0.933333	0.916667	0.735294	0.710938	0.830508	0.797619	0.706215	0.83871	0.68	1	0.90625	0.892857	0.955224	0.989474	0.831735	0.816246
638	0.9375	0.970588	0.8	0.958333	0.691176	0.703125	0.830508	0.761905	0.638418	0.935484	0.746667	1	1	0.871429	0.955224	0.989474	0.819529	0.803081
639	0.927083	0.970588	0.866667	0.916667	0.691176	0.734375	0.79661	0.845238	0.689266	0.903226	0.666667	0.954545	1	0.907143	1	0.989474	0.83435	0.818968
640	0.947917	1	0.866667	0.958333	0.720588	0.710938	0.830508	0.845238	0.723164	0.935484	0.773333	1	1	0.885714	0.985075	0.989474	0.849172	0.835041
641	0.927083	0.970588	0.866667	0.958333	0.691176	0.625	0.728814	0.77381	0.745763	0.83871	0.72	1	0.9375	0.871429	0.985075	0.989474	0.818657	0.801514
642	0.958333	0.970588	0.933333	0.916667	0.720588	0.710938	0.847458	0.761905	0.717514	0.83871	0.76	1	0.96875	0.9	0.970149	0.989474	0.839582	0.824585
643	0.90625	1	0.866667	0.958333	0.764706	0.703125	0.847458	0.75	0.683616	0.774194	0.76	1	1	0.878571	0.985075	0.989474	0.829119	0.813488
644	0.9375	0.970588	0.866667	1	0.602941	0.609375	0.864407	0.77381	0.706215	0.935484	0.613333	0.954545	0.9375	0.878571	0.955224	0.989474	0.808195	0.790577
645	0.947917	1	0.866667	0.916667	0.764706	0.679688	0.830508	0.75	0.694915	0.935484	0.68	0.863636	0.96875	0.9	0.955224	0.989474	0.826504	0.810215
646	0.9375	0.970588	0.933333	0.916667	0.720588	0.6875	0.813559	0.77381	0.649718	0.903226	0.64	0.954545	1	0.907143	0.925373	0.989474	0.816042	0.798971
647	0.885417	1	0.933333	0.916667	0.705882	0.671875	0.79661	0.845238	0.677966	0.903226	0.746667	1	0.9375	0.9	0.985075	0.989474	0.827376	0.811319
648	0.927083	0.970588	0.8	0.958333	0.720588	0.695312	0.762712	0.761905	0.734463	0.870968	0.733333	1	0.9375	0.914286	0.955224	0.989474	0.831735	0.815791
649	0.895833	1	0.8	0.916667	0.661765	0.664062	0.881356	0.75	0.615819	0.870968	0.733333	0.909091	1	0.878571	0.970149	0.989474	0.80558	0.78767
650	0.875	0.970588	0.733333	0.958333	0.720588	0.640625	0.728814	0.845238	0.666667	0.870968	0.773333	1	0.96875	0.907143	0.970149	0.989474	0.817786	0.800973
651	0.927083	0.970588	1	0.958333	0.705882	0.632812	0.847458	0.75	0.610169	0.903226	0.68	0.954545	0.96875	0.878571	0.985075	0.989474	0.80558	0.787956
652	0.958333	1	0.866667	0.875	0.779412	0.6875	0.847458	0.809524	0.677966	0.806452	0.68	1	0.96875	0.907143	0.940299	0.989474	0.829991	0.81408
653	0.916667	0.970588	1	0.958333	0.720588	0.640625	0.830508	0.809524	0.677966	0.83871	0.706667	1	1	0.878571	0.985075	0.989474	0.822145	0.805591
654	0.90625	1	0.933333	0.958333	0.647059	0.640625	0.745763	0.845238	0.655367	0.83871	0.56	0.954545	1	0.914286	0.985075	0.989474	0.80558	0.787364
655	0.916667	1	0.933333	0.916667	0.779412	0.6875	0.762712	0.75	0.711864	0.935484	0.666667	1	1	0.914286	0.970149	0.989474	0.830863	0.815253
656	0.958333	1	0.733333	0.958333	0.75	0.65625	0.813559	0.761905	0.666667	0.870968	0.733333	0.954545	1	0.864286	0.970149	0.989474	0.819529	0.803135
657	0.9375	0.970588	0.866667	0.958333	0.661765	0.632812	0.779661	0.77381	0.638418	0.870968	0.72	1	1	0.85	0.955224	0.989474	0.802964	0.784952
658	0.916667	1	0.933333	0.875	0.691176	0.679688	0.79661	0.833333	0.711864	0.870968	0.64	1	0.96875	0.9	0.925373	0.989474	0.823017	0.806536
659	0.9375	1	0.8	0.916667	0.676471	0.734375	0.779661	0.738095	0.706215	0.903226	0.72	1	1	0.885714	0.970149	0.989474	0.828248	0.812214
660	0.947917	1	1	0.958333	0.691176	0.710938	0.779661	0.75	0.683616	0.83871	0.72	1	0.96875	0.914286	0.970149	0.989474	0.829119	0.813741
661	0.916667	0.970588	0.866667	0.958333	0.75	0.625	0.779661	0.797619	0.644068	0.806452	0.626667	1	1	0.9	0.970149	0.989474	0.807323	0.789513
662	0.90625	1	0.8	0.916667	0.720588	0.703125	0.813559	0.77381	0.627119	0.83871	0.68	1	0.96875	0.871429	0.970149	0.989474	0.809939	0.792261
663	0.927083	1	0.8	1	0.676471	0.71875	0.762712	0.77381	0.689266	0.903226	0.706667	1	1	0.892857	0.940299	0.989474	0.82476	0.808837
664	0.90625	1	0.866667	0.958333	0.691176	0.632812	0.711864	0.77381	0.661017	0.806452	0.64	1	0.96875	0.885714	0.970149	0.989474	0.800349	0.781713
665	0.927083	1	0.866667	0.958333	0.602941	0.679688	0.745763	0.761905	0.632768	0.903226	0.693333	0.954545	0.9375	0.892857	0.955224	0.989474	0.802964	0.784766
666	0.916667	0.970588	0.866667	0.916667	0.691176	0.640625	0.79661	0.77381	0.632768	0.741935	0.773333	0.954545	0.96875	0.892857	0.985075	0.989474	0.808195	0.790316
667	0.916667	0.970588	1	0.958333	0.720588	0.710938	0.745763	0.797619	0.700565	0.806452	0.773333	1	0.96875	0.885714	0.970149	0.989474	0.830863	0.815161
668	0.895833	1	1	0.958333	0.779412	0.65625	0.779661	0.738095	0.723164	0.83871	0.653333	1	1	0.9	0.955224	0.989474	0.823017	0.80639
669	0.916667	1	0.866667	0.916667	0.75	0.625	0.830508	0.738095	0.700565	0.806452	0.68	0.954545	0.96875	0.892857	0.955224	0.989474	0.814298	0.796894
670	0.90625	1	0.933333	0.916667	0.764706	0.703125	0.762712	0.785714	0.677966	0.83871	0.72	0.954545	1	0.864286	0.970149	0.989474	0.822145	0.805731
671	0.885417	0.970588	0.933333	1	0.676471	0.664062	0.864407	0.77381	0.723164	0.870968	0.72	1	0.96875	0.892857	0.970149	0.989474	0.827376	0.811192
672	0.90625	1	0.866667	0.958333	0.75	0.75	0.847458	0.678571	0.694915	0.903226	0.8	0.954545	0.9375	0.878571	0.940299	0.989474	0.830863	0.815284
673	0.90625	0.970588	0.933333	1	0.720588	0.601562	0.79661	0.833333	0.655367	0.935484	0.786667	0.954545	0.96875	0.878571	0.985075	0.989474	0.819529	0.802843
674	0.90625	0.970588	0.866667	1	0.617647	0.617188	0.847458	0.797619	0.661017	0.806452	0.653333	1	0.9375	0.878571	0.970149	0.989474	0.802092	0.78365
675	0.9375	1	0.866667	0.958333	0.573529	0.632812	0.847458	0.833333	0.672316	0.903226	0.6	1	1	0.907143	0.970149	0.989474	0.812554	0.795153
676	0.9375	1	0.933333	1	0.735294	0.625	0.813559	0.809524	0.666667	0.806452	0.693333	1	1	0.9	0.955224	0.989474	0.820401	0.803685
677	0.927083	0.970588	1	1	0.735294	0.664062	0.813559	0.785714	0.689266	0.83871	0.746667	1	0.96875	0.9	0.970149	0.989474	0.829991	0.81415
678	0.916667	0.970588	0.866667	1	0.676471	0.625	0.881356	0.75	0.649718	0.83871	0.693333	1	1	0.892857	0.970149	0.989474	0.810811	0.79327
679	0.958333	0.970588	1	1	0.676471	0.59375	0.79661	0.785714	0.655367	0.741935	0.653333	1	1	0.907143	1	0.989474	0.809939	0.79233
680	0.927083	1	0.866667	0.958333	0.720588	0.65625	0.762712	0.785714	0.644068	0.870968	0.613333	1	1	0.871429	0.970149	0.989474	0.806452	0.788724
681	0.90625	1	0.8	1	0.691176	0.609375	0.745763	0.797619	0.627119	0.967742	0.613333	0.954545	1	0.878571	0.955224	0.989474	0.796861	0.778235
682	0.927083	0.970588	0.933333	0.958333	0.705882	0.695312	0.79661	0.77381	0.694915	0.935484	0.666667	0.909091	1	0.907143	0.955224	0.989474	0.825632	0.809578
683	0.927083	0.970588	0.933333	0.958333	0.661765	0.609375	0.830508	0.785714	0.666667	0.967742	0.64	1	0.96875	0.9	0.985075	0.989474	0.812554	0.795455
684	0.927083	0.970588	1	0.916667	0.852941	0.648438	0.711864	0.833333	0.644068	0.774194	0.693333	0.954545	1	0.885714	0.955224	0.989474	0.816914	0.799979
685	0.958333	1	0.866667	1	0.588235	0.640625	0.711864	0.833333	0.644068	0.83871	0.64	1	0.96875	0.885714	0.970149	0.989474	0.802964	0.784767
686	0.927083	1	0.933333	0.958333	0.632353	0.71875	0.813559	0.833333	0.689266	0.935484	0.666667	0.954545	0.96875	0.878571	0.970149	0.989474	0.826504	0.810555
687	0.9375	1	1	0.916667	0.705882	0.75	0.779661	0.785714	0.683616	0.83871	0.706667	1	1	0.878571	0.970149	0.989474	0.830863	0.815249
688	0.885417	0.970588	0.933333	0.958333	0.661765	0.640625	0.779661	0.77381	0.638418	0.903226	0.613333	0.954545	1	0.871429	0.970149	0.989474	0.796861	0.778252
689	0.916667	1	0.933333	0.916667	0.75	0.632812	0.830508	0.845238	0.649718	0.774194	0.746667	1	0.96875	0.9	0.955224	0.989474	0.821273	0.804388
690	0.927083	1	1	0.916667	0.720588	0.648438	0.813559	0.821429	0.666667	0.870968	0.653333	0.909091	0.9375	0.871429	0.970149	0.989474	0.814298	0.797108
691	0.927083	1	0.933333	0.916667	0.705882	0.6875	0.779661	0.809524	0.677966	0.774194	0.76	0.954545	1	0.885714	0.970149	0.989474	0.82476	0.808593
692	0.90625	1	1	1	0.720588	0.695312	0.79661	0.77381	0.706215	0.935484	0.6	0.954545	1	0.878571	0.955224	0.989474	0.822145	0.805516
693	0.895833	0.970588	0.933333	0.958333	0.705882	0.609375	0.779661	0.797619	0.661017	0.774194	0.746667	0.954545	0.96875	0.892857	0.940299	0.989474	0.807323	0.789305
694	0.895833	0.970588	0.933333	0.958333	0.794118	0.648438	0.813559	0.833333	0.734463	0.806452	0.666667	1	0.96875	0.878571	0.970149	0.989474	0.829119	0.812914
695	0.927083	1	0.866667	0.958333	0.661765	0.65625	0.813559	0.809524	0.666667	0.806452	0.746667	0.954545	1	0.907143	0.985075	0.989474	0.822145	0.805494
696	0.958333	1	0.933333	0.958333	0.735294	0.671875	0.830508	0.75	0.610169	0.774194	0.626667	0.954545	1	0.871429	0.955224	0.989474	0.804708	0.786815
697	0.90625	1	0.866667	1	0.823529	0.734375	0.881356	0.797619	0.706215	0.83871	0.6	0.909091	0.96875	0.878571	0.970149	0.989474	0.833479	0.818045
698	0.947917	1	0.933333	0.916667	0.720588	0.726562	0.745763	0.809524	0.717514	0.903226	0.666667	0.954545	0.9375	0.885714	0.985075	0.989474	0.832607	0.816972
699	0.885417	0.970588	0.8	1	0.735294	0.664062	0.779661	0.809524	0.649718	0.903226	0.64	1	0.96875	0.871429	0.955224	0.989474	0.808195	0.790654
700	0.958333	1	0.866667	0.958333	0.705882	0.6875	0.79661	0.761905	0.683616	0.870968	0.64	1	1	0.885714	0.970149	0.989474	0.821273	0.804576
701	0.895833	0.970588	0.933333	0.958333	0.691176	0.632812	0.79661	0.797619	0.740113	0.903226	0.573333	1	1	0.885714	0.970149	1	0.817786	0.800708
702	0.90625	0.970588	0.866667	0.958333	0.705882	0.671875	0.745763	0.75	0.689266	0.870968	0.64	0.954545	0.96875	0.885714	1	0.989474	0.811683	0.794114
703	0.947917	1	0.933333	0.916667	0.794118	0.679688	0.79661	0.738095	0.621469	0.870968	0.733333	0.954545	0.96875	0.892857	0.955224	0.989474	0.817786	0.801103
704	0.958333	0.970588	0.866667	1	0.676471	0.703125	0.779661	0.785714	0.689266	0.903226	0.706667	0.909091	0.96875	0.878571	0.955224	0.989474	0.823888	0.807414
705	0.885417	1	0.866667	0.875	0.735294	0.679688	0.813559	0.809524	0.655367	0.83871	0.746667	1	1	0.864286	0.955224	0.989474	0.816914	0.799763
706	0.9375	1	0.933333	0.958333	0.75	0.671875	0.881356	0.761905	0.723164	0.870968	0.666667	0.954545	1	0.885714	0.955224	0.989474	0.831735	0.815971
707	0.916667	0.970588	0.8	1	0.691176	0.664062	0.762712	0.761905	0.706215	0.870968	0.653333	1	1	0.878571	0.940299	0.989474	0.813426	0.795802
708	0.9375	1	0.933333	0.958333	0.588235	0.671875	0.745763	0.72619	0.638418	0.903226	0.64	1	0.96875	0.878571	0.955224	1	0.798605	0.780308
709	0.958333	1	1	0.916667	0.720588	0.625	0.830508	0.785714	0.615819	0.806452	0.64	0.863636	1	0.921429	0.970149	0.989474	0.809067	0.791149
710	0.875	0.970588	0.933333	0.958333	0.735294	0.65625	0.711864	0.761905	0.694915	0.83871	0.733333	0.954545	0.96875	0.878571	0.970149	0.989474	0.812554	0.794776
711	0.9375	1	1	0.958333	0.735294	0.695312	0.830508	0.797619	0.689266	0.83871	0.653333	0.954545	1	0.871429	0.970149	0.989474	0.826504	0.810401
712	0.90625	0.970588	1	1	0.691176	0.710938	0.728814	0.75	0.683616	0.806452	0.626667	0.863636	0.96875	0.9	0.955224	0.989474	0.810811	0.792914
713	0.895833	1	0.933333	0.958333	0.705882	0.695312	0.813559	0.785714	0.638418	0.870968	0.693333	1	1	0.885714	0.955224	1	0.816914	0.800009
714	0.916667	1	0.933333	0.958333	0.838235	0.71875	0.711864	0.77381	0.694915	0.83871	0.706667	0.954545	1	0.921429	0.940299	0.989474	0.833479	0.818104
715	0.927083	0.941176	0.933333	0.916667	0.676471	0.664062	0.745763	0.809524	0.689266	0.774194	0.626667	1	0.96875	0.9	0.985075	0.989474	0.812554	0.79512
716	0.927083	0.970588	0.933333	0.875	0.794118	0.695312	0.779661	0.845238	0.672316	0.709677	0.706667	0.909091	0.96875	0.864286	0.970149	0.989474	0.821273	0.804734
717	0.916667	1	1	0.916667	0.779412	0.6875	0.830508	0.809524	0.683616	0.903226	0.72	0.954545	0.96875	0.878571	0.955224	0.989474	0.830863	0.815555
718	0.9375	0.970588	0.866667	0.916667	0.661765	0.664062	0.762712	0.77381	0.734463	0.806452	0.72	1	0.96875	0.892857	0.970149	0.989474	0.823017	0.806517
719	0.927083	1	0.866667	0.958333	0.808824	0.695312	0.79661	0.690476	0.632768	0.935484	0.666667	0.863636	0.96875	0.907143	0.985075	0.989474	0.816042	0.799128
720	0.895833	1	0.933333	0.916667	0.705882	0.703125	0.762712	0.785714	0.666667	0.870968	0.653333	0.954545	0.96875	0.892857	0.985075	0.989474	0.816042	0.798935
721	0.9375	1	0.933333	1	0.676471	0.671875	0.830508	0.797619	0.666667	0.677419	0.76	1	1	0.871429	0.985075	0.989474	0.821273	0.804672
722	0.927083	1	1	0.916667	0.720588	0.585938	0.830508	0.797619	0.610169	0.903226	0.706667	1	1	0.892857	0.955224	0.989474	0.807323	0.790081
723	0.9375	0.970588	0.866667	0.875	0.764706	0.578125	0.745763	0.75	0.672316	0.83871	0.653333	1	0.9375	0.9	0.985075	0.989474	0.803836	0.785661
724	0.90625	0.970588	0.933333	0.916667	0.705882	0.648438	0.813559	0.797619	0.700565	0.967742	0.76	1	0.96875	0.907143	0.970149	0.989474	0.829991	0.814184
725	0.875	1	0.866667	0.958333	0.705882	0.679688	0.830508	0.785714	0.677966	0.83871	0.72	1	0.96875	0.864286	0.970149	0.989474	0.816914	0.799881
726	0.947917	1	0.933333	0.958333	0.735294	0.648438	0.762712	0.809524	0.740113	0.83871	0.693333	0.954545	0.96875	0.892857	0.970149	0.989474	0.830863	0.815001
727	0.895833	1	1	0.958333	0.647059	0.6875	0.762712	0.785714	0.666667	0.870968	0.746667	0.863636	0.96875	0.914286	0.955224	0.989474	0.817786	0.800991
728	0.9375	1	0.933333	0.916667	0.735294	0.6875	0.728814	0.75	0.661017	0.903226	0.653333	0.954545	0.96875	0.864286	0.985075	0.989474	0.811683	0.794155
729	0.854167	1	0.866667	0.958333	0.75	0.65625	0.898305	0.821429	0.666667	0.83871	0.786667	1	1	0.892857	0.970149	0.989474	0.828248	0.812441
730	0.90625	1	0.933333	0.916667	0.720588	0.695312	0.830508	0.72619	0.615819	0.870968	0.6	1	1	0.892857	0.940299	0.989474	0.803836	0.785876
731	0.9375	1	0.933333	0.916667	0.764706	0.6875	0.745763	0.77381	0.683616	0.903226	0.773333	0.909091	0.9375	0.871429	0.970149	0.989474	0.825632	0.809298
732	0.864583	1	1	0.875	0.647059	0.671875	0.762712	0.77381	0.711864	0.967742	0.706667	1	1	0.864286	0.970149	0.989474	0.816042	0.79925
733	0.885417	0.970588	0.866667	0.958333	0.75	0.59375	0.813559	0.785714	0.661017	0.870968	0.68	0.954545	0.96875	0.878571	0.970149	0.989474	0.80558	0.787492
734	0.947917	1	1	0.916667	0.735294	0.617188	0.694915	0.761905	0.683616	0.870968	0.72	0.909091	1	0.9	0.985075	1	0.816914	0.79999
735	0.916667	0.970588	0.933333	0.875	0.691176	0.6875	0.864407	0.738095	0.655367	0.967742	0.84	1	1	0.907143	0.985075	0.989474	0.831735	0.816514
736	0.927083	0.970588	0.866667	1	0.75	0.664062	0.79661	0.714286	0.711864	0.935484	0.68	1	1	0.907143	0.955224	0.989474	0.825632	0.809394
737	0.947917	0.970588	0.933333	0.958333	0.735294	0.632812	0.762712	0.75	0.632768	0.870968	0.626667	1	0.96875	0.892857	0.970149	0.989474	0.804708	0.786467
738	0.916667	1	1	0.958333	0.647059	0.703125	0.864407	0.690476	0.711864	0.903226	0.693333	1	1	0.871429	0.970149	0.989474	0.823017	0.806556
739	0.895833	0.970588	0.933333	0.958333	0.735294	0.679688	0.762712	0.761905	0.683616	0.83871	0.72	0.954545	0.9375	0.892857	0.970149	0.989474	0.817786	0.801196
740	0.885417	1	0.933333	0.958333	0.764706	0.6875	0.762712	0.809524	0.694915	0.870968	0.773333	1	1	0.885714	0.955224	0.989474	0.830863	0.815163
741	0.927083	1	0.933333	0.958333	0.720588	0.6875	0.813559	0.77381	0.661017	0.903226	0.68	0.954545	1	0.9	0.880597	0.989474	0.817786	0.801015
742	0.927083	1	0.933333	0.958333	0.735294	0.703125	0.779661	0.761905	0.683616	0.774194	0.666667	1	0.96875	0.914286	0.940299	1	0.823017	0.806349
743	0.916667	1	0.866667	0.958333	0.720588	0.632812	0.79661	0.821429	0.689266	0.83871	0.626667	1	1	0.885714	0.955224	0.989474	0.81517	0.798101
744	0.885417	1	0.933333	0.958333	0.647059	0.65625	0.745763	0.845238	0.689266	0.774194	0.626667	1	0.96875	0.921429	0.985075	0.989474	0.814298	0.796986
745	0.916667	1	0.933333	0.958333	0.779412	0.710938	0.762712	0.72619	0.677966	0.935484	0.666667	1	0.9375	0.857143	0.985075	0.989474	0.819529	0.802921
746	0.9375	1	0.866667	0.916667	0.808824	0.695312	0.779661	0.702381	0.689266	0.903226	0.626667	0.954545	0.96875	0.878571	0.970149	0.989474	0.818657	0.802136
747	0.90625	0.970588	1	0.958333	0.735294	0.664062	0.779661	0.821429	0.683616	0.870968	0.72	1	1	0.9	0.985075	0.989474	0.828248	0.812151
748	0.927083	1	0.866667	1	0.676471	0.671875	0.813559	0.761905	0.717514	0.903226	0.72	1	1	0.885714	0.955224	0.989474	0.827376	0.811176
749	0.927083	0.970588	0.933333	1	0.661765	0.703125	0.677966	0.833333	0.683616	0.870968	0.693333	1	0.96875	0.871429	0.970149	0.989474	0.818657	0.801831
750	0.927083	1	0.933333	0.958333	0.661765	0.601562	0.864407	0.809524	0.740113	0.903226	0.746667	1	1	0.892857	0.955224	0.989474	0.830863	0.815263
751	0.927083	0.970588	0.933333	0.916667	0.735294	0.671875	0.745763	0.75	0.570621	0.806452	0.706667	1	1	0.9	0.970149	0.989474	0.801221	0.783561
752	0.875	1	0.8	0.916667	0.676471	0.625	0.813559	0.761905	0.666667	0.870968	0.746667	0.954545	0.9375	0.9	0.985075	0.989474	0.809067	0.791171
753	0.947917	1	0.933333	0.958333	0.705882	0.726562	0.79661	0.761905	0.683616	0.870968	0.746667	0.954545	1	0.928571	0.970149	0.989474	0.836966	0.821975
754	0.885417	0.970588	0.933333	0.958333	0.705882	0.703125	0.864407	0.666667	0.728814	0.83871	0.666667	1	1	0.857143	0.970149	0.989474	0.817786	0.800619
755	0.927083	0.970588	1	0.958333	0.676471	0.648438	0.864407	0.797619	0.677966	0.967742	0.653333	1	1	0.892857	0.925373	0.989474	0.820401	0.803742
756	0.895833	1	0.933333	0.916667	0.720588	0.664062	0.762712	0.785714	0.694915	0.83871	0.693333	1	1	0.864286	0.970149	0.989474	0.816042	0.798921
757	0.90625	1	0.866667	0.958333	0.632353	0.65625	0.79661	0.72619	0.638418	0.806452	0.666667	1	1	0.871429	0.970149	0.989474	0.797733	0.778934
758	0.916667	0.970588	1	0.958333	0.75	0.648438	0.779661	0.857143	0.694915	0.774194	0.706667	1	1	0.885714	0.985075	0.989474	0.827376	0.811497
759	0.90625	1	1	0.916667	0.779412	0.65625	0.728814	0.761905	0.672316	0.870968	0.613333	0.954545	1	0.85	0.955224	0.989474	0.80558	0.787813
760	0.916667	1	0.8	1	0.691176	0.640625	0.779661	0.833333	0.649718	0.83871	0.706667	1	0.96875	0.907143	0.970149	0.989474	0.816042	0.798942
761	0.927083	1	1	0.916667	0.676471	0.679688	0.779661	0.72619	0.638418	0.806452	0.586667	0.954545	1	0.885714	0.955224	0.989474	0.799477	0.781067
762	0.90625	0.970588	0.866667	0.958333	0.735294	0.664062	0.762712	0.857143	0.683616	0.903226	0.626667	1	1	0.921429	0.955224	0.989474	0.823888	0.807547
763	0.90625	1	0.933333	0.958333	0.720588	0.726562	0.745763	0.761905	0.672316	0.935484	0.773333	1	0.96875	0.892857	0.985075	0.989474	0.829991	0.814294
764	0.9375	1	0.933333	0.958333	0.602941	0.695312	0.762712	0.761905	0.745763	0.83871	0.68	1	0.96875	0.871429	0.985075	0.989474	0.823017	0.806223
765	0.9375	0.970588	0.933333	1	0.588235	0.695312	0.813559	0.845238	0.706215	0.903226	0.693333	1	1	0.9	0.925373	0.989474	0.828248	0.812213
766	0.9375	1	0.8	0.958333	0.632353	0.757812	0.779661	0.809524	0.694915	0.741935	0.613333	1	1	0.9	0.985075	0.989474	0.823888	0.807291
767	0.9375	0.970588	0.933333	0.875	0.779412	0.703125	0.745763	0.821429	0.706215	0.870968	0.733333	1	1	0.885714	0.970149	0.989474	0.835222	0.820029
768	0.916667	1	0.933333	0.958333	0.838235	0.648438	0.830508	0.75	0.689266	0.903226	0.666667	0.909091	0.96875	0.9	0.970149	0.989474	0.825632	0.809603
769	0.864583	1	1	0.958333	0.705882	0.664062	0.762712	0.797619	0.717514	0.903226	0.72	0.954545	1	0.85	0.970149	0.989474	0.819529	0.802808
770	0.885417	1	0.933333	1	0.75	0.671875	0.745763	0.797619	0.661017	0.903226	0.6	0.954545	0.9375	0.885714	0.985075	0.989474	0.810811	0.793485
771	0.927083	1	0.933333	1	0.75	0.664062	0.762712	0.809524	0.672316	0.83871	0.746667	0.954545	1	0.871429	0.970149	0.989474	0.823888	0.807498
772	0.916667	1	0.866667	1	0.647059	0.671875	0.762712	0.797619	0.717514	0.83871	0.653333	0.954545	0.96875	0.878571	0.985075	0.989474	0.817786	0.800955
773	0.9375	0.970588	0.933333	0.958333	0.691176	0.679688	0.779661	0.738095	0.723164	0.903226	0.733333	0.954545	1	0.878571	0.955224	0.989474	0.825632	0.809467
774	0.9375	0.970588	0.933333	1	0.676471	0.734375	0.762712	0.714286	0.615819	0.903226	0.72	1	0.96875	0.871429	0.970149	0.989474	0.811683	0.79464
775	0.947917	1	0.933333	0.958333	0.720588	0.632812	0.779661	0.761905	0.666667	0.935484	0.68	1	1	0.9	0.970149	0.989474	0.818657	0.801682
776	0.927083	0.970588	0.933333	0.958333	0.647059	0.671875	0.728814	0.821429	0.711864	0.967742	0.68	0.909091	1	0.892857	0.970149	0.989474	0.823017	0.806474
777	0.9375	1	1	1	0.794118	0.601562	0.79661	0.75	0.655367	0.83871	0.666667	0.954545	0.96875	0.885714	0.985075	0.989474	0.812554	0.795183
778	0.885417	0.970588	0.933333	0.916667	0.617647	0.703125	0.813559	0.821429	0.694915	0.806452	0.68	1	1	0.871429	0.955224	0.989474	0.816042	0.798828
779	0.916667	1	1	0.958333	0.661765	0.679688	0.79661	0.821429	0.677966	0.83871	0.653333	1	0.96875	0.9	0.985075	0.989474	0.821273	0.804633
780	0.864583	1	1	1	0.691176	0.671875	0.79661	0.845238	0.689266	0.870968	0.626667	1	0.96875	0.9	0.970149	0.989474	0.820401	0.803775
781	0.947917	0.970588	1	0.916667	0.735294	0.757812	0.830508	0.833333	0.728814	0.903226	0.693333	0.954545	0.9375	0.914286	0.970149	0.989474	0.849172	0.834973
782	0.895833	0.970588	1	0.875	0.735294	0.601562	0.762712	0.845238	0.689266	0.83871	0.626667	1	1	0.878571	0.985075	0.989474	0.810811	0.793223
783	0.90625	1	0.866667	1	0.764706	0.695312	0.813559	0.785714	0.677966	0.870968	0.653333	1	1	0.85	0.955224	0.989474	0.819529	0.803231
784	0.916667	1	0.8	0.916667	0.661765	0.695312	0.762712	0.761905	0.638418	0.83871	0.666667	1	1	0.9	0.955224	1	0.808195	0.790682
785	0.916667	0.970588	0.866667	0.958333	0.691176	0.679688	0.745763	0.785714	0.672316	0.967742	0.666667	1	1	0.892857	0.970149	0.989474	0.817786	0.800934
786	0.916667	0.970588	0.933333	0.958333	0.764706	0.734375	0.762712	0.714286	0.615819	0.870968	0.666667	1	0.96875	0.885714	0.970149	0.989474	0.811683	0.794602
787	0.9375	1	0.933333	0.916667	0.676471	0.71875	0.762712	0.75	0.649718	0.83871	0.746667	0.954545	1	0.878571	0.955224	0.989474	0.816914	0.800123
788	0.90625	1	0.933333	0.958333	0.632353	0.75	0.813559	0.797619	0.627119	0.83871	0.586667	1	0.9375	0.878571	0.970149	0.989474	0.808195	0.790856
789	0.9375	1	0.933333	0.916667	0.705882	0.6875	0.762712	0.75	0.700565	0.774194	0.68	1	0.96875	0.892857	0.970149	0.989474	0.819529	0.802435
790	0.90625	0.970588	0.866667	1	0.794118	0.679688	0.847458	0.75	0.644068	0.870968	0.773333	1	1	0.892857	0.985075	1	0.828248	0.812631
791	0.84375	0.970588	1	0.958333	0.735294	0.710938	0.847458	0.809524	0.711864	0.83871	0.733333	1	0.9375	0.914286	0.970149	0.989474	0.83435	0.818869
792	0.927083	0.970588	0.933333	1	0.720588	0.75	0.762712	0.821429	0.677966	0.83871	0.693333	1	1	0.871429	1	0.989474	0.831735	0.816481
793	0.90625	0.970588	0.933333	0.833333	0.691176	0.695312	0.762712	0.797619	0.672316	0.83871	0.626667	0.954545	0.9375	0.885714	0.970149	0.989474	0.809067	0.791447
794	0.927083	1	0.933333	0.958333	0.705882	0.679688	0.779661	0.797619	0.666667	0.83871	0.653333	0.909091	0.96875	0.9	0.970149	0.989474	0.816914	0.799735
795	0.864583	0.970588	0.866667	0.958333	0.720588	0.625	0.813559	0.809524	0.649718	0.83871	0.733333	0.909091	1	0.878571	0.985075	0.989474	0.809067	0.791352
796	0.885417	0.970588	0.933333	0.916667	0.691176	0.625	0.813559	0.821429	0.661017	0.83871	0.786667	1	0.9375	0.907143	0.985075	0.989474	0.818657	0.801978
797	0.9375	0.970588	1	0.875	0.735294	0.632812	0.864407	0.857143	0.666667	0.870968	0.666667	1	0.90625	0.857143	0.955224	0.989474	0.816914	0.799897
798	0.9375	0.970588	0.933333	0.958333	0.75	0.679688	0.830508	0.738095	0.717514	0.741935	0.706667	0.909091	1	0.907143	0.985075	0.989474	0.829119	0.813156
799	0.927083	1	0.866667	0.958333	0.691176	0.695312	0.813559	0.761905	0.706215	0.870968	0.773333	1	0.96875	0.9	1	0.989474	0.83435	0.818943
800	0.927083	1	1	0.958333	0.779412	0.710938	0.881356	0.809524	0.683616	0.806452	0.773333	0.954545	1	0.907143	0.985075	0.989474	0.844813	0.830412
801	0.90625	1	0.866667	0.958333	0.735294	0.609375	0.779661	0.761905	0.644068	0.774194	0.733333	1	0.90625	0.885714	0.970149	0.989474	0.803836	0.785629
802	0.947917	1	1	0.958333	0.720588	0.695312	0.762712	0.785714	0.649718	0.83871	0.733333	1	1	0.907143	0.970149	0.989474	0.826504	0.81047
803	0.90625	0.970588	0.8	0.958333	0.720588	0.757812	0.847458	0.797619	0.683616	0.935484	0.733333	0.954545	1	0.9	0.955224	0.989474	0.836966	0.822263
804	0.958333	1	1	0.958333	0.676471	0.703125	0.847458	0.785714	0.694915	0.741935	0.68	1	0.9375	0.885714	0.985075	0.989474	0.827376	0.811374
805	0.864583	1	0.933333	0.958333	0.691176	0.734375	0.79661	0.77381	0.700565	0.935484	0.653333	0.954545	1	0.907143	0.970149	0.989474	0.826504	0.810235
806	0.927083	0.970588	0.933333	0.916667	0.661765	0.710938	0.813559	0.821429	0.677966	0.903226	0.573333	0.954545	1	0.907143	0.970149	0.989474	0.820401	0.803962
807	0.9375	0.970588	0.933333	1	0.691176	0.632812	0.779661	0.869048	0.683616	0.967742	0.653333	1	1	0.857143	0.970149	0.989474	0.820401	0.80385
808	0.875	0.970588	1	1	0.676471	0.679688	0.830508	0.821429	0.677966	0.870968	0.68	0.954545	0.96875	0.878571	0.970149	0.989474	0.818657	0.801856
809	0.895833	0.970588	0.933333	0.916667	0.705882	0.6875	0.864407	0.72619	0.632768	0.903226	0.546667	1	0.9375	0.885714	0.985075	0.989474	0.802092	0.783747
810	0.90625	1	0.933333	0.958333	0.764706	0.734375	0.79661	0.77381	0.683616	0.903226	0.693333	0.954545	1	0.885714	0.985075	0.989474	0.831735	0.816
811	0.947917	0.970588	0.866667	0.958333	0.691176	0.65625	0.79661	0.833333	0.694915	0.83871	0.613333	0.954545	1	0.885714	0.985075	0.989474	0.819529	0.802887
812	0.927083	0.970588	1	0.916667	0.720588	0.726562	0.830508	0.821429	0.666667	0.903226	0.733333	0.954545	1	0.892857	0.970149	0.989474	0.83435	0.819143
813	0.916667	1	1	1	0.735294	0.71875	0.830508	0.797619	0.734463	0.83871	0.706667	0.954545	1	0.878571	0.955224	0.989474	0.83871	0.823723
814	0.9375	1	0.933333	0.916667	0.720588	0.65625	0.864407	0.785714	0.723164	0.935484	0.773333	0.954545	0.96875	0.878571	0.985075	0.989474	0.836966	0.82172
815	0.895833	1	0.933333	0.958333	0.676471	0.6875	0.79661	0.77381	0.666667	0.870968	0.653333	0.818182	1	0.885714	0.955224	0.989474	0.809939	0.792004
816	0.895833	1	1	0.958333	0.705882	0.679688	0.779661	0.75	0.694915	0.741935	0.693333	1	1	0.864286	0.970149	0.989474	0.814298	0.797082
817	0.90625	1	0.866667	0.958333	0.75	0.710938	0.830508	0.845238	0.723164	0.903226	0.68	1	1	0.892857	0.985075	0.989474	0.841325	0.826565
818	0.895833	1	0.933333	1	0.691176	0.617188	0.79661	0.833333	0.638418	0.903226	0.72	1	0.9375	0.9	0.970149	0.989474	0.813426	0.795976
819	0.947917	0.970588	0.8	0.958333	0.705882	0.625	0.915254	0.821429	0.723164	0.774194	0.68	1	0.96875	0.9	0.970149	0.989474	0.829119	0.812802
820	0.947917	1	0.866667	0.958333	0.632353	0.671875	0.881356	0.77381	0.672316	0.903226	0.626667	0.954545	0.9375	0.871429	0.985075	0.989474	0.814298	0.797014
821	0.947917	0.970588	0.8	0.958333	0.691176	0.695312	0.847458	0.833333	0.700565	0.870968	0.653333	1	1	0.907143	0.970149	0.989474	0.832607	0.817047
822	0.9375	1	0.866667	0.916667	0.735294	0.679688	0.881356	0.702381	0.666667	0.935484	0.653333	0.954545	0.96875	0.907143	0.985075	0.989474	0.821273	0.804556
823	0.916667	1	1	0.958333	0.705882	0.640625	0.898305	0.72619	0.672316	0.83871	0.64	1	0.90625	0.907143	0.985075	0.989474	0.81517	0.797911
824	0.947917	1	0.933333	0.875	0.720588	0.664062	0.864407	0.77381	0.700565	1	0.586667	0.954545	0.9375	0.878571	0.970149	0.989474	0.821273	0.804678
825	0.90625	0.970588	0.733333	0.958333	0.764706	0.59375	0.813559	0.761905	0.649718	0.83871	0.64	1	1	0.892857	0.925373	0.989474	0.800349	0.781691
826	0.90625	0.970588	0.933333	0.875	0.764706	0.734375	0.830508	0.809524	0.655367	0.870968	0.706667	1	1	0.9	0.985075	0.989474	0.831735	0.816448
827	0.90625	1	0.933333	0.916667	0.705882	0.695312	0.881356	0.72619	0.689266	0.774194	0.613333	0.954545	0.96875	0.864286	0.985075	0.989474	0.812554	0.795107
828	0.9375	1	1	0.958333	0.661765	0.664062	0.881356	0.77381	0.627119	0.967742	0.64	0.954545	1	0.892857	0.985075	0.989474	0.816042	0.799104
829	0.927083	1	1	0.958333	0.794118	0.664062	0.881356	0.821429	0.683616	0.935484	0.6	0.954545	0.96875	0.892857	0.985075	0.989474	0.830863	0.815153
830	0.90625	0.970588	0.933333	0.916667	0.691176	0.710938	0.864407	0.761905	0.672316	0.83871	0.64	0.954545	0.96875	0.907143	0.985075	0.989474	0.820401	0.803585
831	0.947917	1	1	0.958333	0.808824	0.671875	0.779661	0.809524	0.711864	0.806452	0.666667	0.909091	0.90625	0.914286	0.985075	0.989474	0.833479	0.817759
832	0.927083	0.970588	0.933333	0.958333	0.720588	0.6875	0.864407	0.845238	0.706215	0.774194	0.666667	0.954545	0.96875	0.878571	0.985075	0.989474	0.829991	0.813924
833	0.979167	1	0.8	0.958333	0.632353	0.695312	0.881356	0.845238	0.683616	0.83871	0.706667	0.954545	0.96875	0.892857	0.970149	0.989474	0.831735	0.816201
834	0.916667	1	1	0.958333	0.705882	0.65625	0.745763	0.833333	0.683616	0.806452	0.653333	0.954545	0.9375	0.907143	0.985075	0.989474	0.818657	0.80176
835	0.895833	0.970588	0.933333	0.958333	0.735294	0.640625	0.830508	0.809524	0.728814	0.935484	0.733333	1	1	0.914286	0.955224	0.989474	0.835222	0.820041
836	0.927083	0.970588	1	0.958333	0.558824	0.679688	0.79661	0.75	0.694915	0.83871	0.64	1	0.96875	0.892857	0.955224	0.989474	0.809067	0.791078
837	0.9375	0.970588	0.933333	0.958333	0.735294	0.664062	0.779661	0.797619	0.711864	0.83871	0.613333	0.954545	0.96875	0.914286	0.955224	0.989474	0.823017	0.806307
838	0.90625	1	1	0.958333	0.632353	0.679688	0.847458	0.77381	0.723164	0.806452	0.72	0.954545	0.9375	0.878571	0.955224	0.989474	0.822145	0.805341
839	0.916667	1	0.866667	0.916667	0.764706	0.703125	0.847458	0.77381	0.672316	0.83871	0.666667	0.954545	0.96875	0.871429	0.985075	0.989474	0.822145	0.805363
840	0.895833	1	0.866667	0.958333	0.661765	0.742188	0.881356	0.833333	0.745763	0.741935	0.466667	0.954545	1	0.878571	0.970149	0.989474	0.822145	0.805448
841	0.927083	0.970588	0.933333	0.958333	0.632353	0.671875	0.79661	0.75	0.677966	0.83871	0.613333	0.954545	0.9375	0.921429	0.970149	0.989474	0.809939	0.791974
842	0.916667	1	0.933333	0.958333	0.764706	0.710938	0.898305	0.857143	0.621469	0.870968	0.72	1	0.96875	0.892857	1	0.989474	0.83435	0.819348
843	0.927083	0.970588	0.866667	0.916667	0.632353	0.671875	0.762712	0.738095	0.638418	0.83871	0.733333	1	0.96875	0.9	0.970149	0.989474	0.806452	0.788769
844	0.885417	0.970588	0.933333	0.916667	0.75	0.65625	0.915254	0.797619	0.717514	0.774194	0.64	0.954545	0.9375	0.892857	0.985075	0.989474	0.823888	0.807312
845	0.947917	1	0.933333	0.916667	0.647059	0.695312	0.830508	0.785714	0.677966	0.903226	0.626667	0.954545	0.96875	0.885714	0.970149	0.989474	0.818657	0.801823
846	0.90625	0.970588	0.933333	0.916667	0.661765	0.640625	0.847458	0.72619	0.706215	0.935484	0.666667	1	1	0.885714	0.970149	0.989474	0.81517	0.797827
847	0.854167	0.970588	0.933333	0.958333	0.75	0.609375	0.847458	0.797619	0.610169	0.83871	0.76	0.909091	0.9375	0.892857	0.970149	0.989474	0.804708	0.786551
848	0.9375	0.970588	1	0.916667	0.720588	0.65625	0.813559	0.761905	0.672316	0.903226	0.706667	0.954545	1	0.892857	0.955224	0.989474	0.820401	0.80392
849	0.947917	1	0.866667	0.958333	0.75	0.640625	0.79661	0.678571	0.717514	0.870968	0.64	1	0.9375	0.857143	0.985075	0.989474	0.812554	0.795027
850	0.947917	1	0.933333	0.916667	0.691176	0.703125	0.847458	0.845238	0.632768	0.83871	0.693333	0.954545	1	0.885714	0.970149	0.989474	0.823888	0.807912
851	0.895833	0.970588	0.933333	0.875	0.676471	0.75	0.830508	0.75	0.689266	0.774194	0.626667	0.909091	1	0.9	0.985075	0.989474	0.818657	0.801667
852	0.916667	0.970588	0.8	0.958333	0.705882	0.65625	0.830508	0.785714	0.661017	0.741935	0.653333	1	0.96875	0.878571	0.955224	0.989474	0.807323	0.789169
853	0.9375	1	0.933333	0.958333	0.632353	0.695312	0.779661	0.77381	0.706215	1	0.68	0.954545	0.9375	0.885714	0.985075	1	0.825632	0.809334
854	0.927083	1	0.933333	1	0.735294	0.710938	0.728814	0.785714	0.700565	0.774194	0.6	1	1	0.9	0.985075	0.989474	0.823017	0.806487
855	0.916667	1	0.933333	0.958333	0.676471	0.65625	0.864407	0.738095	0.649718	0.870968	0.813333	1	1	0.885714	0.970149	0.989474	0.821273	0.804618
856	0.916667	0.941176	1	1	0.676471	0.6875	0.779661	0.833333	0.649718	0.903226	0.666667	0.909091	1	0.885714	0.955224	0.989474	0.816042	0.79921
857	0.9375	1	1	0.958333	0.676471	0.617188	0.813559	0.821429	0.666667	0.870968	0.68	1	0.9375	0.885714	0.985075	0.989474	0.816042	0.799128
858	0.958333	1	0.866667	0.916667	0.676471	0.648438	0.830508	0.75	0.717514	0.935484	0.6	1	0.9375	0.878571	0.970149	0.989474	0.816914	0.799735
859	0.96875	1	0.933333	0.875	0.735294	0.726562	0.847458	0.77381	0.683616	0.967742	0.666667	0.954545	1	0.885714	0.985075	0.989474	0.835222	0.820193
860	0.916667	1	0.933333	0.916667	0.794118	0.609375	0.830508	0.77381	0.666667	0.903226	0.653333	0.954545	1	0.9	0.970149	0.989474	0.816914	0.799764
861	0.9375	1	0.933333	0.916667	0.632353	0.734375	0.864407	0.857143	0.638418	0.83871	0.68	1	0.96875	0.885714	0.955224	0.989474	0.823888	0.807858
862	0.90625	0.970588	0.933333	0.958333	0.602941	0.75	0.779661	0.809524	0.644068	0.870968	0.693333	1	1	0.885714	0.970149	0.989474	0.817786	0.801376
863	0.90625	1	1	0.875	0.720588	0.710938	0.898305	0.821429	0.677966	0.774194	0.64	1	1	0.914286	0.955224	0.989474	0.829119	0.813231
864	0.90625	1	0.933333	0.875	0.720588	0.664062	0.79661	0.690476	0.728814	0.83871	0.613333	1	1	0.878571	0.970149	0.989474	0.812554	0.794809
865	0.90625	0.970588	0.933333	0.916667	0.691176	0.640625	0.830508	0.785714	0.672316	0.903226	0.746667	0.954545	0.96875	0.921429	0.985075	0.989474	0.823017	0.806386
866	0.927083	0.970588	0.933333	0.958333	0.661765	0.6875	0.864407	0.761905	0.672316	0.903226	0.586667	0.954545	0.96875	0.857143	1	0.989474	0.811683	0.7942
867	0.958333	1	1	0.916667	0.647059	0.625	0.881356	0.821429	0.677966	0.903226	0.666667	0.954545	1	0.907143	0.985075	0.989474	0.82476	0.808592
868	0.916667	1	1	0.958333	0.764706	0.695312	0.864407	0.880952	0.672316	0.967742	0.68	0.909091	0.96875	0.892857	0.985075	0.989474	0.83871	0.824
869	0.9375	1	1	0.875	0.691176	0.71875	0.79661	0.714286	0.694915	0.870968	0.746667	0.909091	0.96875	0.878571	0.955224	0.989474	0.823017	0.80661
870	0.916667	0.970588	0.933333	1	0.75	0.679688	0.915254	0.785714	0.666667	0.806452	0.693333	0.954545	0.9375	0.9	0.970149	0.989474	0.826504	0.810657
871	0.916667	0.970588	0.933333	1	0.676471	0.679688	0.813559	0.678571	0.627119	0.870968	0.706667	0.954545	0.96875	0.9	0.955224	0.989474	0.80558	0.787372
872	0.916667	1	1	0.958333	0.720588	0.632812	0.79661	0.77381	0.700565	0.903226	0.626667	1	0.9375	0.892857	0.970149	0.989474	0.816914	0.799812
873	0.958333	1	0.8	0.958333	0.705882	0.6875	0.898305	0.821429	0.683616	0.774194	0.706667	0.909091	0.96875	0.878571	0.985075	0.989474	0.829119	0.8131
874	0.958333	0.970588	0.8	1	0.602941	0.648438	0.813559	0.702381	0.677966	0.741935	0.68	0.954545	1	0.892857	0.985075	0.989474	0.80558	0.787485
875	0.9375	1	1	0.958333	0.735294	0.710938	0.898305	0.845238	0.689266	0.870968	0.653333	1	1	0.907143	0.970149	0.989474	0.841325	0.826671
876	0.927083	1	0.866667	0.916667	0.691176	0.71875	0.881356	0.77381	0.728814	0.870968	0.626667	0.954545	0.96875	0.885714	0.985075	0.989474	0.830863	0.815062
877	0.96875	1	0.933333	0.916667	0.779412	0.640625	0.813559	0.845238	0.677966	0.967742	0.653333	0.909091	0.96875	0.878571	0.970149	0.989474	0.827376	0.811285
878	0.9375	1	1	0.916667	0.720588	0.679688	0.915254	0.785714	0.672316	0.903226	0.653333	1	0.96875	0.9	1	0.989474	0.830863	0.815327
879	0.916667	1	0.933333	0.916667	0.735294	0.617188	0.881356	0.785714	0.717514	0.870968	0.706667	1	1	0.914286	0.970149	0.989474	0.830863	0.815218
880	0.895833	1	0.933333	0.875	0.676471	0.703125	0.898305	0.77381	0.694915	0.83871	0.653333	1	0.9375	0.871429	0.985075	0.989474	0.820401	0.803743
881	0.916667	1	0.933333	0.958333	0.676471	0.640625	0.79661	0.75	0.728814	0.83871	0.666667	1	0.96875	0.9	0.955224	0.989474	0.818657	0.801565
882	0.927083	1	0.933333	0.916667	0.661765	0.632812	0.864407	0.845238	0.672316	0.903226	0.68	0.909091	1	0.871429	0.970149	0.989474	0.817786	0.800905
883	0.854167	1	1	0.833333	0.75	0.6875	0.864407	0.714286	0.655367	0.903226	0.653333	0.954545	1	0.885714	0.985075	0.989474	0.811683	0.79406
884	0.916667	0.970588	1	0.958333	0.720588	0.65625	0.847458	0.833333	0.677966	0.870968	0.626667	0.954545	0.96875	0.892857	0.985075	0.989474	0.822145	0.805649
885	0.9375	0.970588	0.933333	0.916667	0.661765	0.679688	0.847458	0.72619	0.59322	0.741935	0.68	0.954545	1	0.892857	0.985075	0.989474	0.801221	0.783201
886	0.927083	1	1	0.958333	0.735294	0.6875	0.864407	0.833333	0.638418	0.774194	0.64	1	0.96875	0.9	1	0.989474	0.823888	0.807623
887	0.947917	1	0.866667	1	0.647059	0.65625	0.864407	0.797619	0.677966	0.870968	0.76	0.954545	0.96875	0.892857	0.985075	0.989474	0.827376	0.811246
888	0.927083	0.970588	1	0.916667	0.705882	0.710938	0.864407	0.785714	0.694915	0.903226	0.693333	0.954545	0.96875	0.885714	0.985075	0.989474	0.831735	0.816199
889	0.9375	1	0.933333	0.958333	0.720588	0.734375	0.813559	0.690476	0.711864	0.967742	0.76	0.954545	0.96875	0.885714	0.985075	0.989474	0.836094	0.821066
890	0.927083	1	0.933333	0.958333	0.735294	0.710938	0.915254	0.702381	0.666667	0.870968	0.733333	1	0.96875	0.892857	0.970149	0.989474	0.829119	0.813368
891	0.895833	0.970588	0.933333	0.958333	0.720588	0.710938	0.847458	0.690476	0.711864	0.903226	0.693333	0.909091	0.96875	0.878571	0.970149	0.989474	0.822145	0.805376
892	0.927083	1	1	0.916667	0.720588	0.6875	0.813559	0.761905	0.689266	0.806452	0.666667	0.954545	1	0.892857	0.985075	0.989474	0.823017	0.806397
893	0.885417	1	0.866667	0.916667	0.661765	0.695312	0.915254	0.797619	0.689266	0.935484	0.72	0.863636	0.9375	0.914286	0.970149	0.989474	0.828248	0.812213
894	0.927083	0.970588	1	1	0.691176	0.710938	0.79661	0.785714	0.683616	0.935484	0.653333	1	1	0.885714	0.985075	0.989474	0.827376	0.811524
895	0.9375	1	0.933333	0.958333	0.632353	0.6875	0.79661	0.702381	0.706215	0.806452	0.72	0.909091	1	0.857143	0.985075	0.989474	0.814298	0.796803
896	0.9375	1	0.933333	1	0.838235	0.742188	0.864407	0.833333	0.717514	0.870968	0.746667	0.909091	0.96875	0.914286	0.985075	0.989474	0.85789	0.844678
897	0.9375	0.970588	0.866667	0.958333	0.75	0.664062	0.830508	0.845238	0.683616	0.806452	0.72	1	1	0.907143	0.970149	0.989474	0.832607	0.816858
898	0.9375	1	1	0.958333	0.676471	0.75	0.745763	0.785714	0.677966	1	0.613333	0.954545	0.96875	0.9	0.985075	0.989474	0.827376	0.81155
899	0.9375	0.970588	1	0.916667	0.661765	0.671875	0.898305	0.809524	0.672316	0.935484	0.613333	0.954545	0.96875	0.907143	0.985075	0.989474	0.823888	0.807633
900	0.947917	0.970588	0.933333	0.958333	0.720588	0.710938	0.813559	0.761905	0.677966	0.870968	0.706667	0.954545	1	0.871429	0.970149	0.989474	0.825632	0.809413
901	0.895833	1	0.933333	0.875	0.691176	0.632812	0.915254	0.77381	0.672316	0.83871	0.693333	1	1	0.885714	0.970149	0.989474	0.816042	0.798864
902	0.9375	0.970588	1	0.916667	0.647059	0.6875	0.779661	0.761905	0.683616	0.935484	0.813333	0.954545	0.96875	0.907143	0.985075	0.989474	0.829991	0.81409
903	0.875	1	1	0.958333	0.676471	0.664062	0.881356	0.761905	0.672316	0.83871	0.693333	1	0.96875	0.878571	0.970149	0.989474	0.81517	0.797956
904	0.885417	1	0.933333	0.916667	0.75	0.609375	0.847458	0.797619	0.661017	0.870968	0.64	1	0.96875	0.871429	0.970149	0.989474	0.808195	0.79106
905	0.875	0.970588	0.933333	0.916667	0.691176	0.671875	0.847458	0.797619	0.655367	0.774194	0.64	0.954545	1	0.878571	0.985075	0.989474	0.808195	0.790261
906	0.927083	0.970588	0.933333	0.916667	0.676471	0.695312	0.711864	0.785714	0.689266	0.83871	0.613333	0.909091	1	0.885714	0.985075	1	0.812554	0.794939
907	0.895833	1	1	0.916667	0.661765	0.648438	0.898305	0.821429	0.644068	0.903226	0.626667	0.954545	0.9375	0.914286	0.970149	0.989474	0.814298	0.797109
908	0.90625	1	0.933333	0.916667	0.632353	0.65625	0.847458	0.785714	0.745763	1	0.693333	0.954545	0.90625	0.921429	0.985075	0.989474	0.831735	0.81576
909	0.90625	1	0.933333	0.958333	0.676471	0.75	0.949153	0.785714	0.677966	0.967742	0.546667	1	0.96875	0.878571	0.985075	0.989474	0.827376	0.811675
910	0.927083	1	1	0.875	0.705882	0.726562	0.898305	0.761905	0.728814	0.83871	0.666667	1	0.96875	0.907143	0.970149	0.989474	0.837838	0.822524
911	0.90625	1	0.866667	0.875	0.720588	0.703125	0.881356	0.785714	0.627119	0.903226	0.626667	0.954545	1	0.9	0.970149	0.989474	0.816042	0.799003
912	0.875	0.970588	0.866667	0.875	0.720588	0.648438	0.830508	0.738095	0.694915	0.83871	0.653333	1	0.90625	0.871429	0.985075	0.989474	0.806452	0.788215
913	0.916667	1	0.933333	0.916667	0.617647	0.703125	0.847458	0.761905	0.677966	0.870968	0.786667	0.954545	0.96875	0.878571	0.970149	0.989474	0.823017	0.8066
914	0.9375	1	0.933333	0.958333	0.735294	0.617188	0.847458	0.72619	0.683616	0.903226	0.706667	0.954545	1	0.907143	0.985075	0.989474	0.822145	0.805475
915	0.916667	0.970588	0.866667	0.916667	0.691176	0.664062	0.779661	0.892857	0.666667	0.83871	0.706667	0.954545	1	0.871429	0.985075	0.989474	0.820401	0.804186
916	0.9375	1	1	0.958333	0.720588	0.703125	0.830508	0.785714	0.672316	0.806452	0.653333	0.954545	1	0.892857	0.970149	0.989474	0.82476	0.808504
917	0.9375	1	0.933333	0.875	0.794118	0.742188	0.932203	0.761905	0.661017	0.870968	0.706667	0.954545	1	0.892857	0.985075	0.989474	0.83871	0.823857
918	0.916667	1	0.933333	0.916667	0.720588	0.695312	0.79661	0.797619	0.661017	0.83871	0.72	0.909091	0.90625	0.878571	0.985075	0.989474	0.818657	0.801838
919	0.916667	1	1	0.958333	0.705882	0.6875	0.898305	0.761905	0.711864	0.903226	0.733333	0.954545	0.96875	0.885714	0.985075	1	0.836094	0.820667
920	0.916667	1	0.933333	0.958333	0.691176	0.71875	0.864407	0.761905	0.706215	0.83871	0.68	1	1	0.878571	1	0.989474	0.830863	0.815084
921	0.927083	0.941176	0.933333	1	0.705882	0.632812	0.881356	0.797619	0.672316	0.774194	0.64	0.954545	0.9375	0.871429	0.985075	0.989474	0.811683	0.794195
922	0.916667	0.970588	1	0.958333	0.720588	0.671875	0.881356	0.809524	0.666667	0.774194	0.72	1	1	0.878571	0.985075	0.989474	0.825632	0.809217
923	0.9375	1	0.866667	0.958333	0.617647	0.726562	0.779661	0.785714	0.723164	0.83871	0.746667	0.954545	0.90625	0.871429	1	0.989474	0.828248	0.812181
924	0.916667	1	0.933333	0.916667	0.852941	0.703125	0.898305	0.77381	0.711864	0.967742	0.613333	0.954545	0.96875	0.885714	0.955224	0.989474	0.836966	0.821946
925	0.927083	0.970588	0.933333	0.958333	0.691176	0.679688	0.847458	0.72619	0.711864	0.935484	0.72	0.954545	0.96875	0.9	0.955224	0.989474	0.827376	0.811023
926	0.916667	0.970588	0.933333	0.875	0.632353	0.742188	0.898305	0.77381	0.672316	0.935484	0.68	1	0.96875	0.892857	0.970149	0.989474	0.826504	0.810329
927	0.9375	0.970588	1	0.958333	0.735294	0.671875	0.762712	0.845238	0.638418	0.83871	0.746667	1	1	0.885714	0.955224	0.989474	0.823017	0.806461
928	0.9375	1	0.933333	0.958333	0.602941	0.679688	0.915254	0.77381	0.655367	0.935484	0.706667	0.954545	0.9375	0.885714	0.955224	0.989474	0.818657	0.801999
929	0.927083	1	0.933333	0.916667	0.691176	0.65625	0.847458	0.797619	0.728814	0.83871	0.666667	1	1	0.9	0.955224	0.989474	0.828248	0.812083
930	0.9375	1	0.933333	0.916667	0.661765	0.632812	0.864407	0.857143	0.728814	0.806452	0.6	1	0.96875	0.914286	0.955224	0.989474	0.825632	0.80917
931	0.947917	1	0.933333	0.958333	0.705882	0.703125	0.881356	0.809524	0.638418	0.903226	0.746667	1	0.96875	0.885714	0.955224	0.989474	0.829991	0.814374
932	0.9375	0.941176	0.933333	0.916667	0.705882	0.601562	0.830508	0.785714	0.711864	0.903226	0.706667	0.909091	0.96875	0.9	0.970149	0.989474	0.820401	0.803575
933	0.927083	0.970588	1	1	0.705882	0.703125	0.830508	0.797619	0.672316	0.870968	0.693333	1	0.9375	0.892857	0.985075	0.989474	0.828248	0.812298
934	0.947917	0.970588	0.933333	0.833333	0.705882	0.648438	0.830508	0.821429	0.689266	0.741935	0.706667	1	0.96875	0.857143	0.985075	0.989474	0.817786	0.800593
935	0.916667	1	0.933333	0.916667	0.720588	0.617188	0.830508	0.785714	0.689266	0.903226	0.693333	0.954545	1	0.885714	0.985075	0.989474	0.819529	0.80284
936	0.927083	0.970588	1	0.958333	0.661765	0.703125	0.898305	0.821429	0.666667	0.935484	0.68	1	0.96875	0.885714	0.970149	0.989474	0.829119	0.81376
937	0.916667	1	1	0.958333	0.676471	0.695312	0.898305	0.845238	0.621469	0.806452	0.72	0.954545	1	0.907143	0.985075	0.989474	0.826504	0.81067
938	0.916667	0.970588	0.866667	0.958333	0.735294	0.726562	0.830508	0.785714	0.745763	0.967742	0.64	1	0.96875	0.871429	0.985075	0.989474	0.836966	0.821728
939	0.9375	0.970588	0.933333	0.958333	0.705882	0.703125	0.830508	0.72619	0.661017	0.967742	0.706667	0.954545	1	0.885714	0.970149	0.989474	0.823017	0.806661
940	0.916667	0.970588	0.933333	0.958333	0.720588	0.625	0.847458	0.809524	0.655367	0.870968	0.733333	0.954545	0.96875	0.878571	0.985075	0.989474	0.817786	0.800741
941	0.9375	0.941176	1	0.916667	0.691176	0.71875	0.898305	0.75	0.661017	0.935484	0.666667	0.954545	0.96875	0.857143	0.985075	0.989474	0.821273	0.805036
942	0.927083	1	1	0.958333	0.764706	0.695312	0.830508	0.809524	0.655367	0.83871	0.733333	0.954545	0.9375	0.892857	0.985075	0.989474	0.829991	0.814345
943	0.947917	1	1	1	0.764706	0.65625	0.847458	0.797619	0.706215	0.935484	0.533333	0.954545	0.96875	0.892857	0.985075	0.989474	0.826504	0.810404
944	0.947917	0.970588	1	0.958333	0.705882	0.640625	0.864407	0.75	0.694915	0.774194	0.626667	1	1	0.892857	0.970149	0.989474	0.817786	0.800693
945	0.916667	0.970588	1	1	0.647059	0.648438	0.847458	0.785714	0.700565	0.903226	0.68	1	0.96875	0.871429	0.970149	0.989474	0.819529	0.802537
946	0.947917	1	0.866667	1	0.720588	0.6875	0.813559	0.845238	0.632768	0.967742	0.693333	0.954545	0.96875	0.871429	0.985075	0.989474	0.82476	0.808897
947	0.895833	1	0.933333	1	0.75	0.75	0.847458	0.761905	0.638418	0.83871	0.653333	0.954545	0.9375	0.892857	0.985075	0.989474	0.822145	0.805735
948	0.90625	1	1	1	0.691176	0.757812	0.881356	0.821429	0.728814	0.83871	0.706667	0.954545	0.96875	0.871429	0.985075	0.989474	0.843069	0.828417
949	0.885417	1	0.866667	0.958333	0.661765	0.679688	0.847458	0.833333	0.661017	0.870968	0.746667	0.909091	0.96875	0.921429	0.985075	0.989474	0.825632	0.809694
950	0.927083	1	0.866667	0.916667	0.691176	0.726562	0.881356	0.809524	0.694915	0.903226	0.72	1	0.96875	0.907143	0.970149	0.989474	0.83871	0.82366
951	0.895833	1	0.866667	1	0.632353	0.726562	0.847458	0.833333	0.655367	0.870968	0.746667	1	0.9375	0.878571	0.985075	0.989474	0.825632	0.80973
952	0.916667	0.970588	0.866667	0.958333	0.720588	0.679688	0.79661	0.72619	0.677966	0.935484	0.653333	0.954545	0.96875	0.9	0.985075	0.989474	0.816914	0.799858
953	0.927083	0.970588	0.933333	0.916667	0.676471	0.703125	0.847458	0.880952	0.661017	0.935484	0.666667	1	1	0.9	0.970149	0.989474	0.830863	0.815603
954	0.90625	1	0.933333	0.958333	0.647059	0.71875	0.779661	0.761905	0.666667	0.935484	0.68	1	1	0.9	0.970149	1	0.821273	0.804685
955	0.9375	1	0.933333	1	0.779412	0.6875	0.898305	0.809524	0.700565	0.741935	0.666667	0.909091	0.96875	0.864286	1	0.989474	0.831735	0.815935
956	0.9375	1	1	1	0.661765	0.695312	0.881356	0.77381	0.683616	0.935484	0.6	1	0.96875	0.907143	0.955224	0.989474	0.825632	0.809346
957	0.9375	1	0.866667	0.833333	0.823529	0.664062	0.898305	0.809524	0.632768	0.935484	0.706667	0.954545	0.96875	0.892857	0.970149	0.989474	0.827376	0.811492
958	0.916667	0.970588	1	0.916667	0.558824	0.742188	0.881356	0.821429	0.723164	0.774194	0.613333	0.954545	1	0.85	0.985075	0.989474	0.821273	0.804569
959	0.90625	0.970588	0.933333	1	0.720588	0.695312	0.881356	0.761905	0.672316	0.903226	0.653333	1	0.96875	0.892857	0.985075	0.989474	0.82476	0.808676
960	0.916667	1	1	0.875	0.632353	0.671875	0.864407	0.785714	0.745763	0.935484	0.653333	1	1	0.885714	0.985075	0.989474	0.829991	0.814164
961	0.9375	0.970588	0.933333	0.958333	0.691176	0.640625	0.813559	0.821429	0.723164	0.774194	0.653333	0.954545	1	0.9	0.985075	0.989474	0.82476	0.808049
962	0.90625	1	1	0.958333	0.735294	0.570312	0.79661	0.845238	0.700565	0.935484	0.653333	0.954545	0.96875	0.878571	1	0.989474	0.817786	0.800805
963	0.875	1	0.933333	0.958333	0.705882	0.695312	0.711864	0.785714	0.700565	0.903226	0.64	1	1	0.878571	0.955224	0.989474	0.81517	0.797914
964	0.90625	0.970588	0.8	0.916667	0.735294	0.632812	0.864407	0.77381	0.672316	0.903226	0.613333	1	0.96875	0.878571	0.985075	0.989474	0.810811	0.792847
965	0.885417	1	1	0.958333	0.691176	0.710938	0.881356	0.809524	0.632768	0.870968	0.613333	0.909091	0.96875	0.892857	0.970149	0.989474	0.81517	0.798165
966	0.885417	1	0.866667	0.958333	0.691176	0.6875	0.847458	0.833333	0.706215	0.806452	0.68	1	0.9375	0.907143	0.955224	0.989474	0.826504	0.810069
967	0.9375	1	1	0.958333	0.632353	0.695312	0.779661	0.738095	0.728814	0.903226	0.68	0.954545	1	0.907143	1	0.989474	0.829119	0.812995
968	0.916667	1	0.866667	0.916667	0.632353	0.585938	0.898305	0.809524	0.694915	0.806452	0.68	0.954545	0.9375	0.907143	0.970149	0.989474	0.812554	0.795028
969	0.927083	0.970588	0.933333	0.958333	0.75	0.632812	0.847458	0.809524	0.683616	0.903226	0.64	1	0.96875	0.885714	0.925373	0.989474	0.818657	0.801992
970	0.927083	1	1	0.958333	0.764706	0.726562	0.881356	0.761905	0.655367	0.806452	0.706667	1	1	0.871429	0.970149	0.989474	0.829119	0.813275
971	0.927083	0.970588	0.933333	1	0.720588	0.726562	0.830508	0.833333	0.717514	0.870968	0.693333	0.954545	0.9375	0.864286	0.955224	0.989474	0.83435	0.818851
972	0.916667	0.970588	0.933333	0.958333	0.735294	0.71875	0.830508	0.797619	0.661017	0.935484	0.706667	0.954545	0.96875	0.907143	0.970149	0.989474	0.830863	0.815394
973	0.927083	1	0.933333	0.916667	0.691176	0.65625	0.898305	0.77381	0.655367	0.83871	0.68	0.954545	0.96875	0.878571	0.970149	0.989474	0.81517	0.798191
974	0.927083	1	0.933333	0.875	0.661765	0.664062	0.847458	0.678571	0.627119	0.903226	0.626667	0.954545	0.96875	0.892857	0.970149	0.989474	0.799477	0.78089
975	0.9375	1	0.933333	0.916667	0.720588	0.726562	0.779661	0.833333	0.644068	0.806452	0.68	0.954545	0.90625	0.871429	0.955224	0.989474	0.817786	0.801156
976	0.895833	1	0.933333	0.958333	0.676471	0.671875	0.898305	0.833333	0.706215	0.903226	0.653333	1	1	0.885714	0.985075	0.989474	0.829991	0.814089
977	0.875	1	1	0.958333	0.691176	0.671875	0.898305	0.809524	0.677966	0.83871	0.72	1	0.9375	0.871429	0.985075	0.989474	0.823017	0.806894
978	0.90625	1	0.933333	1	0.573529	0.726562	0.898305	0.75	0.711864	0.967742	0.586667	1	0.90625	0.864286	0.955224	1	0.817786	0.800817
979	0.947917	1	0.933333	0.875	0.720588	0.703125	0.864407	0.857143	0.627119	0.870968	0.706667	0.954545	1	0.885714	1	0.989474	0.829119	0.813775
980	0.854167	0.970588	0.933333	0.958333	0.75	0.65625	0.881356	0.821429	0.649718	0.774194	0.666667	0.954545	0.96875	0.907143	0.985075	1	0.816914	0.800107
981	0.90625	1	0.933333	0.958333	0.720588	0.734375	0.915254	0.761905	0.723164	0.903226	0.666667	0.909091	0.96875	0.914286	0.985075	1	0.841325	0.826558
982	0.9375	1	0.933333	0.958333	0.676471	0.679688	0.79661	0.785714	0.700565	0.967742	0.693333	1	1	0.878571	0.985075	1	0.829119	0.81303
983	0.916667	1	0.933333	0.916667	0.720588	0.703125	0.79661	0.77381	0.723164	0.903226	0.68	1	1	0.914286	0.955224	0.989474	0.833479	0.817866
984	0.90625	1	1	1	0.779412	0.71875	0.79661	0.72619	0.655367	0.83871	0.64	0.954545	1	0.892857	0.970149	0.989474	0.819529	0.803189
985	0.9375	1	0.933333	0.958333	0.720588	0.671875	0.779661	0.761905	0.666667	0.806452	0.653333	0.954545	0.9375	0.907143	0.970149	0.989474	0.81517	0.798072
986	0.895833	0.970588	1	0.958333	0.632353	0.65625	0.847458	0.845238	0.717514	0.903226	0.586667	0.954545	1	0.928571	0.970149	0.989474	0.82476	0.808327
987	0.90625	0.970588	0.933333	1	0.676471	0.679688	0.830508	0.833333	0.700565	0.870968	0.613333	0.954545	1	0.871429	0.970149	0.989474	0.820401	0.80357
988	0.9375	1	0.933333	0.916667	0.735294	0.640625	0.898305	0.75	0.672316	0.774194	0.693333	1	0.96875	0.885714	0.970149	0.989474	0.818657	0.801853
989	0.927083	1	0.933333	0.958333	0.720588	0.671875	0.881356	0.75	0.672316	0.806452	0.64	0.954545	0.9375	0.914286	0.985075	0.989474	0.820401	0.803373
990	0.947917	1	0.933333	0.916667	0.735294	0.65625	0.881356	0.833333	0.706215	0.774194	0.626667	0.954545	0.9375	0.885714	0.970149	0.989474	0.825632	0.809357
991	0.947917	0.970588	1	0.916667	0.661765	0.6875	0.847458	0.738095	0.672316	0.967742	0.653333	0.909091	1	0.892857	0.985075	0.989474	0.820401	0.803912
992	0.927083	0.970588	0.933333	0.958333	0.691176	0.710938	0.830508	0.833333	0.689266	0.83871	0.626667	0.954545	0.9375	0.878571	0.985075	0.989474	0.823888	0.80745
993	0.90625	0.970588	0.933333	0.958333	0.676471	0.71875	0.847458	0.75	0.638418	0.83871	0.653333	1	1	0.864286	0.970149	1	0.811683	0.794513
994	0.875	1	0.866667	0.875	0.720588	0.617188	0.79661	0.821429	0.672316	0.870968	0.706667	0.954545	1	0.892857	0.955224	0.989474	0.811683	0.793849
995	0.9375	1	1	0.958333	0.661765	0.664062	0.847458	0.809524	0.655367	0.806452	0.653333	0.909091	0.9375	0.871429	0.985075	0.989474	0.812554	0.795059
996	0.9375	1	1	1	0.661765	0.664062	0.847458	0.761905	0.661017	0.806452	0.693333	1	0.96875	0.907143	0.985075	0.989474	0.820401	0.803657
997	0.916667	1	0.933333	1	0.632353	0.703125	0.830508	0.797619	0.734463	0.83871	0.666667	0.954545	0.9375	0.892857	1	0.989474	0.829991	0.813685
998	0.885417	1	0.933333	0.958333	0.75	0.65625	0.847458	0.785714	0.672316	0.870968	0.72	0.954545	0.90625	0.9	0.970149	0.989474	0.821273	0.804661
999	0.927083	1	0.933333	0.875	0.720588	0.679688	0.847458	0.809524	0.717514	0.903226	0.666667	1	0.9375	0.885714	0.985075	0.989474	0.830863	0.814998
1000	0.927083	0.970588	1	1	0.735294	0.679688	0.813559	0.797619	0.655367	0.935484	0.666667	0.954545	1	0.885714	0.985075	0.989474	0.823888	0.807761
1001	0.895833	0.970588	0.933333	0.875	0.676471	0.632812	0.864407	0.785714	0.694915	0.83871	0.68	1	0.9375	0.892857	0.985075	0.989474	0.81517	0.797942
1002	0.90625	1	0.933333	0.916667	0.705882	0.648438	0.830508	0.821429	0.723164	0.806452	0.613333	0.954545	0.9375	0.885714	0.985075	0.989474	0.819529	0.80241
1003	0.958333	1	0.866667	1	0.691176	0.726562	0.864407	0.797619	0.700565	0.806452	0.76	0.954545	0.90625	0.9	0.985075	0.989474	0.839582	0.824412
1004	0.895833	1	1	1	0.705882	0.695312	0.830508	0.821429	0.661017	0.774194	0.546667	1	0.96875	0.892857	0.985075	0.989474	0.814298	0.797299
1005	0.9375	1	0.933333	1	0.647059	0.679688	0.915254	0.797619	0.677966	0.903226	0.68	0.954545	0.96875	0.907143	0.955224	0.989474	0.828248	0.812041
1006	0.885417	1	0.933333	0.875	0.602941	0.742188	0.762712	0.821429	0.661017	0.83871	0.68	1	1	0.878571	0.985075	1	0.816042	0.79902
1007	0.885417	1	0.933333	0.958333	0.661765	0.632812	0.847458	0.761905	0.723164	0.903226	0.706667	0.954545	1	0.9	0.985075	0.989474	0.823017	0.806427
1008	0.916667	0.970588	0.933333	1	0.691176	0.671875	0.864407	0.72619	0.677966	0.870968	0.653333	1	1	0.892857	0.985075	0.989474	0.818657	0.801913
1009	0.916667	1	0.933333	0.958333	0.75	0.671875	0.881356	0.77381	0.661017	0.870968	0.586667	1	0.9375	0.871429	1	0.989474	0.816042	0.799014
1010	0.90625	1	0.933333	0.916667	0.705882	0.65625	0.898305	0.738095	0.621469	0.967742	0.68	0.909091	0.96875	0.878571	0.970149	0.989474	0.809067	0.791396
1011	0.947917	0.970588	0.933333	0.958333	0.647059	0.632812	0.79661	0.845238	0.723164	0.741935	0.733333	0.954545	0.875	0.892857	0.970149	0.989474	0.822145	0.805385
1012	0.947917	0.970588	0.933333	0.958333	0.735294	0.65625	0.881356	0.809524	0.677966	0.870968	0.706667	1	0.96875	0.885714	0.970149	0.989474	0.829119	0.813349
1013	0.90625	0.970588	1	0.958333	0.691176	0.609375	0.830508	0.809524	0.655367	0.83871	0.613333	1	0.9375	0.892857	0.985075	0.989474	0.806452	0.788284
1014	0.9375	1	0.933333	0.916667	0.764706	0.640625	0.79661	0.821429	0.649718	0.83871	0.68	0.909091	0.84375	0.907143	0.955224	0.989474	0.814298	0.796982
1015	0.958333	1	1	0.958333	0.632353	0.679688	0.813559	0.761905	0.621469	0.935484	0.706667	0.954545	0.96875	0.928571	0.985075	0.989474	0.819529	0.802981
1016	0.927083	1	0.866667	0.916667	0.720588	0.671875	0.864407	0.809524	0.610169	0.806452	0.693333	0.954545	1	0.871429	0.985075	0.989474	0.812554	0.795426
1017	0.9375	1	1	0.916667	0.764706	0.6875	0.847458	0.761905	0.649718	0.903226	0.746667	1	1	0.914286	1	0.989474	0.83435	0.819085
1018	0.885417	1	0.933333	0.916667	0.764706	0.632812	0.864407	0.833333	0.683616	0.83871	0.706667	0.954545	0.9375	0.878571	0.985075	0.989474	0.822145	0.805446
1019	0.9375	1	1	0.916667	0.691176	0.648438	0.864407	0.821429	0.706215	0.903226	0.666667	1	1	0.9	0.985075	0.989474	0.831735	0.815899
1020	0.90625	1	0.933333	1	0.691176	0.726562	0.898305	0.75	0.689266	0.903226	0.76	0.954545	1	0.9	0.970149	0.989474	0.836966	0.821784
1021	0.9375	1	0.933333	1	0.691176	0.695312	0.881356	0.785714	0.655367	0.806452	0.666667	0.954545	0.96875	0.878571	0.955224	0.989474	0.819529	0.803055
1022	0.9375	0.970588	1	0.958333	0.764706	0.703125	0.898305	0.77381	0.683616	0.806452	0.68	0.954545	0.96875	0.878571	0.985075	0.989474	0.830863	0.815423
1023	0.927083	1	1	0.875	0.661765	0.671875	0.847458	0.785714	0.711864	0.774194	0.666667	0.954545	1	0.871429	0.940299	1	0.818657	0.801424
1024	0.958333	1	0.933333	1	0.676471	0.710938	0.881356	0.785714	0.717514	0.935484	0.666667	0.954545	0.96875	0.892857	0.985075	0.989474	0.83871	0.823808
1025	0.927083	0.970588	1	0.958333	0.823529	0.632812	0.864407	0.75	0.677966	0.83871	0.693333	1	1	0.878571	0.970149	0.989474	0.823888	0.807616
1026	0.916667	1	1	0.958333	0.720588	0.679688	0.779661	0.833333	0.581921	0.774194	0.68	0.954545	1	0.9	0.985075	0.989474	0.809939	0.792839
1027	0.875	1	1	1	0.544118	0.671875	0.881356	0.72619	0.672316	0.870968	0.666667	0.954545	0.9375	0.892857	0.985075	0.989474	0.806452	0.788255
1028	0.9375	1	1	1	0.676471	0.679688	0.864407	0.77381	0.672316	0.83871	0.72	0.954545	0.9375	0.885714	0.985075	0.989474	0.82476	0.808338
1029	0.927083	0.970588	0.933333	1	0.676471	0.65625	0.898305	0.714286	0.683616	0.870968	0.693333	1	0.96875	0.907143	0.985075	0.989474	0.822145	0.805532
1030	0.916667	0.941176	0.933333	0.916667	0.676471	0.710938	0.762712	0.761905	0.677966	0.903226	0.693333	0.954545	0.96875	0.864286	0.985075	0.989474	0.81517	0.798292
1031	0.885417	1	1	0.958333	0.617647	0.664062	0.864407	0.809524	0.717514	0.870968	0.626667	0.954545	0.96875	0.878571	0.985075	0.989474	0.818657	0.801873
1032	0.9375	1	0.866667	0.916667	0.691176	0.679688	0.830508	0.77381	0.655367	0.903226	0.733333	0.909091	0.96875	0.885714	0.970149	0.989474	0.819529	0.802586
1033	0.916667	0.970588	0.933333	0.875	0.705882	0.640625	0.898305	0.75	0.711864	0.83871	0.76	1	0.96875	0.928571	0.955224	0.989474	0.829991	0.814024
1034	0.927083	0.970588	0.933333	0.916667	0.676471	0.59375	0.864407	0.75	0.666667	0.83871	0.693333	0.954545	1	0.892857	0.940299	0.989474	0.806452	0.787983
1035	0.916667	1	1	1	0.705882	0.625	0.779661	0.809524	0.649718	0.870968	0.746667	0.954545	0.9375	0.857143	0.985075	0.989474	0.812554	0.795255
1036	0.885417	0.970588	0.933333	1	0.691176	0.703125	0.864407	0.809524	0.683616	0.903226	0.653333	0.909091	1	0.885714	0.970149	0.989474	0.823888	0.807592
1037	0.90625	1	0.933333	1	0.647059	0.6875	0.728814	0.845238	0.661017	0.741935	0.626667	0.954545	0.9375	0.9	0.955224	0.989474	0.808195	0.790475
1038	0.96875	1	0.933333	0.916667	0.764706	0.65625	0.79661	0.761905	0.666667	0.870968	0.653333	1	0.96875	0.9	0.985075	0.989474	0.822145	0.805544
1039	0.916667	1	0.933333	0.916667	0.691176	0.695312	0.864407	0.785714	0.655367	0.774194	0.68	0.863636	1	0.9	0.970149	0.989474	0.817786	0.801016
1040	0.9375	0.970588	0.933333	0.958333	0.705882	0.695312	0.830508	0.797619	0.661017	0.83871	0.693333	1	1	0.871429	0.985075	0.989474	0.823017	0.806789
1041	0.916667	1	1	0.958333	0.764706	0.695312	0.915254	0.702381	0.711864	0.935484	0.693333	0.954545	0.9375	0.95	0.970149	0.989474	0.840453	0.825469
1042	0.916667	0.941176	0.933333	1	0.617647	0.640625	0.864407	0.821429	0.649718	0.967742	0.626667	0.954545	0.96875	0.914286	0.985075	0.989474	0.814298	0.797247
1043	0.916667	0.970588	0.933333	0.916667	0.617647	0.664062	0.881356	0.785714	0.661017	0.774194	0.653333	1	0.96875	0.914286	0.970149	0.989474	0.812554	0.794977
1044	0.9375	0.970588	1	0.916667	0.735294	0.679688	0.813559	0.797619	0.666667	0.903226	0.773333	0.954545	1	0.857143	0.970149	0.989474	0.826504	0.810629
1045	0.90625	1	1	0.958333	0.617647	0.648438	0.847458	0.761905	0.666667	0.870968	0.653333	1	1	0.892857	0.970149	0.989474	0.810811	0.793183
1046	0.9375	1	1	1	0.794118	0.6875	0.881356	0.845238	0.757062	0.935484	0.6	0.954545	0.9375	0.878571	1	0.989474	0.846556	0.832256
1047	0.927083	0.941176	0.933333	0.916667	0.676471	0.6875	0.711864	0.75	0.655367	0.645161	0.68	1	1	0.907143	0.985075	0.989474	0.80558	0.787186
1048	0.927083	0.970588	0.866667	0.916667	0.647059	0.695312	0.915254	0.75	0.689266	0.935484	0.68	1	1	0.885714	1	0.989474	0.826504	0.810423
1049	0.90625	1	0.933333	0.916667	0.720588	0.734375	0.915254	0.797619	0.683616	0.903226	0.76	0.954545	0.96875	0.9	0.985075	0.989474	0.841325	0.826708
1050	0.90625	1	1	0.875	0.691176	0.632812	0.864407	0.77381	0.683616	0.870968	0.64	1	1	0.892857	0.985075	0.989474	0.816042	0.79895
1051	0.9375	1	0.866667	0.958333	0.735294	0.734375	0.830508	0.761905	0.672316	0.903226	0.68	1	0.96875	0.9	0.970149	0.989474	0.830863	0.815402
1052	0.916667	1	1	1	0.735294	0.648438	0.830508	0.77381	0.711864	0.83871	0.693333	1	0.96875	0.885714	0.970149	0.989474	0.826504	0.810112
1053	0.90625	0.970588	1	0.916667	0.617647	0.71875	0.847458	0.797619	0.59887	0.83871	0.693333	1	0.96875	0.878571	1	0.989474	0.809939	0.792715
1054	0.90625	1	1	0.916667	0.676471	0.632812	0.79661	0.809524	0.672316	0.967742	0.693333	1	0.96875	0.907143	0.985075	0.989474	0.820401	0.803849
1055	0.916667	0.970588	0.933333	0.958333	0.676471	0.671875	0.864407	0.857143	0.672316	0.83871	0.626667	0.954545	1	0.878571	0.970149	0.989474	0.819529	0.802679
1056	0.927083	1	0.933333	0.916667	0.676471	0.734375	0.898305	0.761905	0.689266	0.83871	0.64	0.954545	0.9375	0.871429	0.985075	0.989474	0.823888	0.807234
1057	0.9375	0.970588	0.933333	1	0.867647	0.65625	0.745763	0.797619	0.683616	0.774194	0.706667	0.909091	1	0.9	0.970149	0.989474	0.828248	0.812362
1058	0.864583	0.970588	1	0.916667	0.735294	0.679688	0.881356	0.75	0.655367	0.870968	0.76	1	0.9375	0.885714	0.970149	0.989474	0.819529	0.802945
1059	0.947917	0.970588	1	0.916667	0.617647	0.664062	0.813559	0.869048	0.644068	0.741935	0.666667	0.954545	0.96875	0.892857	1	0.989474	0.814298	0.796965
1060	0.90625	0.970588	1	0.958333	0.735294	0.671875	0.881356	0.77381	0.723164	0.870968	0.666667	0.954545	0.96875	0.9	0.955224	0.989474	0.829991	0.81433
1061	0.916667	0.970588	0.866667	0.958333	0.735294	0.726562	0.881356	0.77381	0.672316	0.83871	0.546667	0.954545	0.90625	0.878571	0.970149	0.989474	0.81517	0.798113
1062	0.885417	1	0.933333	0.958333	0.720588	0.695312	0.881356	0.845238	0.661017	0.903226	0.546667	1	0.96875	0.9	0.985075	0.989474	0.821273	0.804921
1063	0.927083	1	0.933333	1	0.75	0.695312	0.847458	0.797619	0.711864	0.83871	0.68	1	0.96875	0.9	0.985075	0.989474	0.836966	0.821712
1064	0.90625	1	0.933333	0.916667	0.705882	0.710938	0.847458	0.857143	0.711864	0.870968	0.613333	1	0.9375	0.892857	0.970149	0.989474	0.830863	0.815083
1065	0.916667	0.970588	1	0.958333	0.632353	0.664062	0.898305	0.809524	0.694915	0.870968	0.693333	1	1	0.871429	0.970149	0.989474	0.823888	0.807515
1066	0.90625	1	0.933333	1	0.676471	0.71875	0.847458	0.809524	0.649718	0.870968	0.666667	1	1	0.9	0.985075	0.989474	0.825632	0.809782
1067	0.90625	1	0.933333	1	0.75	0.640625	0.762712	0.77381	0.655367	0.870968	0.72	1	1	0.871429	1	0.989474	0.816042	0.798884
1068	0.916667	0.970588	0.933333	0.958333	0.661765	0.617188	0.847458	0.845238	0.700565	0.83871	0.706667	1	1	0.892857	1	0.989474	0.82476	0.808504
1069	0.916667	1	0.8	0.958333	0.647059	0.703125	0.932203	0.809524	0.774011	0.870968	0.666667	1	1	0.892857	0.970149	0.989474	0.842197	0.827226
1070	0.927083	1	0.933333	0.875	0.617647	0.632812	0.813559	0.738095	0.683616	0.806452	0.733333	1	1	0.914286	0.985075	0.989474	0.814298	0.796965
1071	0.84375	0.970588	0.933333	0.958333	0.779412	0.65625	0.830508	0.821429	0.610169	0.903226	0.786667	0.954545	0.96875	0.885714	0.955224	0.989474	0.81517	0.798239
1072	0.9375	0.970588	0.933333	1	0.661765	0.65625	0.847458	0.809524	0.711864	0.870968	0.626667	0.954545	0.875	0.885714	0.985075	0.989474	0.820401	0.803549
1073	0.927083	1	1	0.916667	0.676471	0.710938	0.864407	0.75	0.706215	0.83871	0.64	1	0.96875	0.9	0.955224	0.989474	0.825632	0.809259
1074	0.90625	0.970588	0.8	1	0.676471	0.695312	0.881356	0.821429	0.728814	0.903226	0.653333	1	0.9375	0.878571	0.970149	0.989474	0.829991	0.814053
1075	0.9375	1	0.933333	0.916667	0.676471	0.710938	0.847458	0.845238	0.711864	0.870968	0.72	1	0.96875	0.871429	1	0.989474	0.837838	0.822864
1076	0.927083	1	0.866667	0.916667	0.705882	0.671875	0.779661	0.845238	0.610169	0.903226	0.706667	0.954545	0.96875	0.9	0.970149	0.989474	0.81517	0.798607
1077	0.927083	1	0.933333	0.958333	0.735294	0.609375	0.79661	0.785714	0.672316	0.870968	0.666667	1	1	0.892857	0.985075	0.989474	0.816042	0.798925
1078	0.9375	0.970588	0.933333	0.958333	0.617647	0.640625	0.915254	0.690476	0.672316	0.903226	0.6	0.863636	0.9375	0.928571	0.955224	0.989474	0.806452	0.788308
1079	0.875	0.970588	0.866667	0.875	0.823529	0.65625	0.813559	0.77381	0.638418	0.870968	0.64	1	1	0.871429	0.970149	0.989474	0.808195	0.790623
1080	0.90625	0.941176	0.933333	0.958333	0.735294	0.65625	0.898305	0.821429	0.666667	0.903226	0.693333	1	0.9375	0.892857	0.985075	0.989474	0.825632	0.809654
1081	0.895833	0.970588	1	0.875	0.691176	0.65625	0.79661	0.833333	0.615819	0.83871	0.68	1	0.9375	0.892857	0.985075	0.989474	0.807323	0.789385
1082	0.875	0.970588	0.933333	0.958333	0.647059	0.65625	0.898305	0.857143	0.677966	0.903226	0.733333	0.954545	1	0.907143	0.985075	0.989474	0.828248	0.812256
1083	0.885417	1	0.933333	0.916667	0.647059	0.625	0.864407	0.75	0.694915	0.774194	0.733333	1	1	0.871429	0.985075	0.989474	0.811683	0.793901
1084	0.927083	0.970588	0.933333	1	0.647059	0.703125	0.813559	0.785714	0.644068	0.83871	0.666667	0.954545	0.96875	0.921429	0.985075	0.989474	0.818657	0.802344
1085	0.864583	1	1	0.916667	0.661765	0.75	0.830508	0.761905	0.677966	0.806452	0.613333	0.954545	0.90625	0.885714	0.970149	0.989474	0.812554	0.795144
1086	0.916667	1	0.866667	1	0.647059	0.632812	0.813559	0.77381	0.706215	0.935484	0.72	0.909091	1	0.885714	0.985075	0.989474	0.820401	0.803378
1087	0.916667	1	0.933333	0.958333	0.75	0.65625	0.915254	0.785714	0.717514	0.806452	0.706667	0.909091	0.96875	0.878571	0.985075	0.989474	0.830863	0.815022
1088	0.9375	0.970588	0.933333	0.916667	0.647059	0.6875	0.79661	0.845238	0.677966	0.870968	0.693333	0.954545	0.9375	0.878571	1	0.989474	0.822145	0.805528
1089	0.916667	0.970588	0.933333	0.916667	0.75	0.71875	0.864407	0.845238	0.728814	0.83871	0.706667	0.954545	0.9375	0.871429	0.985075	0.989474	0.839582	0.824539
1090	0.927083	0.970588	0.933333	1	0.661765	0.632812	0.932203	0.738095	0.728814	0.870968	0.626667	0.954545	0.96875	0.9	0.970149	0.989474	0.822145	0.805487
1091	0.916667	1	0.933333	0.916667	0.735294	0.664062	0.762712	0.738095	0.638418	0.806452	0.693333	1	0.96875	0.878571	0.985075	0.989474	0.807323	0.789564
1092	0.90625	1	1	0.916667	0.691176	0.6875	0.847458	0.738095	0.661017	0.83871	0.68	1	1	0.878571	0.985075	0.989474	0.816042	0.798893
1093	0.927083	0.970588	0.933333	0.916667	0.75	0.695312	0.864407	0.785714	0.655367	0.83871	0.68	1	0.96875	0.9	0.970149	0.989474	0.82476	0.808956
1094	0.895833	1	1	0.916667	0.661765	0.648438	0.915254	0.797619	0.694915	0.806452	0.693333	1	1	0.871429	0.985075	0.989474	0.821273	0.804681
1095	0.916667	0.970588	1	1	0.705882	0.703125	0.813559	0.845238	0.644068	0.870968	0.626667	0.954545	1	0.878571	0.970149	0.989474	0.819529	0.802942
1096	0.947917	1	1	0.958333	0.779412	0.742188	0.898305	0.761905	0.683616	0.83871	0.573333	0.954545	0.96875	0.892857	1	0.989474	0.833479	0.818165
1097	0.958333	1	0.933333	1	0.691176	0.59375	0.864407	0.857143	0.711864	0.83871	0.64	1	0.9375	0.892857	0.985075	0.989474	0.825632	0.80913
1098	0.895833	1	0.933333	0.875	0.676471	0.703125	0.813559	0.75	0.649718	0.774194	0.666667	0.954545	1	0.907143	0.970149	0.989474	0.810811	0.793338
1099	0.895833	0.970588	0.933333	0.916667	0.647059	0.664062	0.813559	0.785714	0.655367	0.774194	0.666667	0.954545	0.9375	0.907143	0.970149	0.989474	0.806452	0.788399
1100	0.927083	0.970588	0.933333	1	0.735294	0.625	0.813559	0.821429	0.677966	0.903226	0.613333	1	0.9375	0.878571	0.970149	0.989474	0.81517	0.7981
1101	0.927083	0.970588	0.933333	1	0.705882	0.640625	0.830508	0.857143	0.644068	0.83871	0.64	0.954545	1	0.907143	0.970149	0.989474	0.817786	0.801034
1102	0.9375	0.970588	0.933333	0.916667	0.588235	0.664062	0.847458	0.72619	0.706215	0.967742	0.653333	0.954545	0.9375	0.9	0.985075	0.989474	0.816042	0.798777
1103	0.875	0.970588	0.933333	0.958333	0.705882	0.648438	0.881356	0.821429	0.677966	0.903226	0.626667	1	0.96875	0.907143	0.970149	1	0.820401	0.803634
1104	0.916667	1	0.933333	0.916667	0.75	0.6875	0.881356	0.77381	0.683616	0.903226	0.626667	1	1	0.878571	0.970149	0.989474	0.82476	0.808687
1105	0.90625	1	0.933333	0.916667	0.735294	0.671875	0.762712	0.785714	0.717514	0.806452	0.733333	1	1	0.892857	0.985075	0.989474	0.828248	0.812028
1106	0.895833	1	1	0.958333	0.676471	0.601562	0.830508	0.738095	0.706215	0.774194	0.746667	0.954545	0.96875	0.878571	0.985075	0.989474	0.812554	0.79488
1107	0.958333	0.970588	1	0.958333	0.691176	0.632812	0.864407	0.75	0.644068	0.741935	0.68	0.954545	1	0.907143	0.955224	0.989474	0.811683	0.794216
1108	0.895833	1	0.933333	0.958333	0.573529	0.703125	0.864407	0.845238	0.649718	0.903226	0.746667	0.954545	0.9375	0.85	0.970149	0.989474	0.816042	0.799434
1109	0.916667	1	0.866667	1	0.779412	0.640625	0.762712	0.785714	0.683616	0.709677	0.68	1	0.90625	0.892857	0.970149	0.989474	0.814298	0.796878
1110	0.927083	0.970588	0.933333	0.958333	0.676471	0.679688	0.813559	0.797619	0.711864	0.870968	0.626667	0.909091	0.96875	0.892857	0.955224	0.989474	0.820401	0.803501
1111	0.895833	0.970588	0.933333	0.958333	0.617647	0.695312	0.881356	0.797619	0.655367	0.741935	0.653333	1	0.9375	0.885714	0.970149	0.989474	0.809939	0.792353
1112	0.947917	0.970588	1	0.916667	0.661765	0.625	0.830508	0.797619	0.661017	0.806452	0.626667	1	0.9375	0.857143	0.970149	0.989474	0.803836	0.785563
1113	0.90625	0.970588	0.933333	0.958333	0.647059	0.695312	0.830508	0.702381	0.677966	0.967742	0.706667	1	1	0.885714	0.970149	0.989474	0.817786	0.800807
1114	0.927083	0.970588	0.933333	0.958333	0.808824	0.703125	0.847458	0.809524	0.655367	0.903226	0.666667	1	0.9375	0.892857	0.985075	0.989474	0.830863	0.815498
1115	0.90625	1	0.933333	0.833333	0.735294	0.695312	0.847458	0.761905	0.638418	0.709677	0.72	1	1	0.885714	0.985075	0.989474	0.81517	0.798172
1116	0.958333	1	0.933333	1	0.647059	0.71875	0.830508	0.75	0.694915	0.806452	0.733333	1	0.96875	0.907143	1	0.989474	0.833479	0.818103
1117	0.84375	0.970588	0.933333	0.958333	0.661765	0.695312	0.881356	0.797619	0.700565	0.83871	0.68	0.954545	1	0.864286	0.985075	0.989474	0.818657	0.80159
1118	0.927083	1	0.933333	0.916667	0.735294	0.65625	0.830508	0.809524	0.734463	0.806452	0.666667	0.954545	1	0.907143	0.970149	0.989474	0.831735	0.815658
1119	0.9375	0.970588	0.933333	0.875	0.691176	0.703125	0.881356	0.714286	0.740113	0.967742	0.68	0.954545	0.90625	0.935714	0.985075	0.989474	0.836966	0.821566
1120	0.916667	1	0.933333	0.916667	0.676471	0.671875	0.830508	0.892857	0.644068	0.83871	0.586667	1	0.96875	0.878571	0.970149	0.989474	0.813426	0.796386
1121	0.927083	1	0.933333	0.958333	0.720588	0.703125	0.881356	0.821429	0.672316	0.870968	0.666667	0.954545	0.96875	0.9	0.955224	0.989474	0.829991	0.814202
1122	0.9375	1	0.933333	0.958333	0.691176	0.726562	0.745763	0.75	0.700565	0.967742	0.706667	1	0.96875	0.878571	0.970149	0.989474	0.828248	0.812294
1123	0.916667	0.970588	0.933333	0.958333	0.602941	0.632812	0.898305	0.761905	0.689266	0.903226	0.666667	0.863636	0.96875	0.885714	0.940299	0.989474	0.809067	0.790963
1124	0.895833	0.970588	0.933333	1	0.720588	0.65625	0.864407	0.75	0.644068	0.903226	0.626667	1	1	0.892857	0.970149	0.989474	0.811683	0.794092
1125	0.875	0.970588	1	0.958333	0.632353	0.664062	0.915254	0.857143	0.689266	0.83871	0.6	0.954545	0.96875	0.914286	0.970149	0.989474	0.820401	0.803425
1126	0.947917	0.970588	1	0.958333	0.735294	0.75	0.864407	0.797619	0.683616	0.806452	0.626667	1	1	0.907143	0.970149	0.989474	0.836094	0.820914
1127	0.927083	1	0.933333	0.916667	0.764706	0.695312	0.830508	0.738095	0.706215	1	0.72	1	1	0.885714	0.985075	0.989474	0.836094	0.821009
1128	0.947917	1	0.933333	1	0.617647	0.6875	0.898305	0.785714	0.689266	0.903226	0.653333	1	1	0.892857	0.925373	0.989474	0.82476	0.808464
1129	0.916667	0.970588	0.933333	1	0.75	0.679688	0.813559	0.797619	0.711864	0.967742	0.773333	0.954545	0.96875	0.878571	1	0.989474	0.83871	0.823751
1130	0.9375	0.970588	0.933333	1	0.735294	0.6875	0.847458	0.75	0.672316	0.83871	0.653333	0.909091	0.9375	0.892857	0.985075	0.989474	0.820401	0.803915
1131	0.90625	0.970588	0.933333	0.916667	0.720588	0.679688	0.779661	0.761905	0.672316	0.870968	0.666667	0.909091	0.96875	0.857143	0.985075	0.989474	0.809939	0.792226
1132	0.885417	1	1	0.958333	0.735294	0.710938	0.864407	0.797619	0.627119	0.83871	0.72	0.954545	0.96875	0.885714	0.985075	0.989474	0.822145	0.805766
1133	0.927083	0.970588	1	0.958333	0.647059	0.601562	0.881356	0.821429	0.677966	0.870968	0.706667	0.909091	1	0.892857	0.970149	0.989474	0.817786	0.801048
1134	0.9375	1	1	0.916667	0.75	0.648438	0.813559	0.809524	0.694915	0.870968	0.573333	1	0.96875	0.857143	0.970149	0.989474	0.816042	0.798741
1135	0.90625	1	0.933333	0.916667	0.705882	0.570312	0.79661	0.809524	0.757062	0.903226	0.573333	1	0.96875	0.871429	1	1	0.81517	0.798016
1136	0.927083	0.970588	0.933333	0.958333	0.602941	0.679688	0.864407	0.797619	0.728814	0.774194	0.76	1	1	0.892857	0.970149	0.989474	0.830863	0.814893
1137	0.90625	0.970588	1	0.916667	0.794118	0.710938	0.881356	0.75	0.700565	0.806452	0.72	0.954545	0.9375	0.878571	0.970149	0.989474	0.830863	0.814832
1138	0.916667	1	0.933333	0.958333	0.573529	0.710938	0.79661	0.761905	0.677966	0.903226	0.653333	0.909091	0.96875	0.892857	0.985075	0.989474	0.813426	0.795979
1139	0.916667	1	1	0.958333	0.705882	0.640625	0.932203	0.738095	0.677966	0.870968	0.64	1	1	0.907143	0.955224	0.989474	0.820401	0.803703
1140	0.916667	1	0.933333	0.958333	0.705882	0.703125	0.898305	0.833333	0.689266	0.903226	0.693333	0.909091	0.96875	0.921429	0.985075	0.978947	0.837838	0.822891
1141	0.947917	1	1	0.958333	0.647059	0.671875	0.864407	0.77381	0.694915	0.83871	0.706667	0.954545	1	0.871429	0.925373	0.989474	0.821273	0.804452
1142	0.947917	1	1	0.958333	0.75	0.6875	0.847458	0.75	0.711864	0.83871	0.613333	0.863636	0.875	0.907143	0.985075	0.989474	0.825632	0.809132
1143	0.916667	1	0.933333	0.875	0.661765	0.695312	0.847458	0.845238	0.711864	0.903226	0.72	1	1	0.878571	0.985075	0.989474	0.83435	0.818824
1144	0.916667	0.970588	0.933333	1	0.573529	0.679688	0.813559	0.77381	0.661017	0.83871	0.653333	0.954545	1	0.907143	0.985075	0.989474	0.810811	0.792997
1145	0.90625	0.970588	1	0.875	0.691176	0.648438	0.79661	0.857143	0.666667	0.935484	0.626667	0.954545	0.90625	0.892857	0.985075	0.989474	0.814298	0.797297
1146	0.958333	0.970588	0.866667	0.958333	0.75	0.710938	0.830508	0.809524	0.59322	0.903226	0.68	1	0.9375	0.878571	0.985075	1	0.819529	0.803068
1147	0.916667	0.970588	0.933333	0.916667	0.705882	0.703125	0.864407	0.77381	0.581921	0.83871	0.72	0.954545	1	0.85	0.955224	0.989474	0.80558	0.788025
1148	0.90625	0.970588	0.933333	0.958333	0.661765	0.609375	0.864407	0.77381	0.700565	0.774194	0.68	0.909091	0.96875	0.878571	0.985075	0.989474	0.809939	0.79208
1149	0.916667	1	0.933333	0.875	0.705882	0.703125	0.779661	0.785714	0.655367	0.935484	0.626667	1	1	0.885714	0.985075	0.989474	0.816914	0.800117
1150	0.916667	1	0.933333	1	0.705882	0.679688	0.847458	0.738095	0.694915	0.903226	0.706667	0.954545	0.9375	0.878571	0.955224	0.989474	0.822145	0.805558
1151	0.927083	1	0.933333	0.958333	0.720588	0.664062	0.847458	0.75	0.615819	0.903226	0.746667	0.954545	0.96875	0.9	0.985075	0.989474	0.817786	0.801507
1152	0.916667	1	1	0.875	0.647059	0.640625	0.79661	0.809524	0.734463	0.967742	0.666667	0.954545	0.96875	0.864286	0.970149	0.989474	0.820401	0.803556
1153	0.916667	1	0.933333	1	0.735294	0.71875	0.915254	0.77381	0.683616	0.83871	0.613333	0.954545	0.96875	0.9	0.985075	0.989474	0.829991	0.814245
1154	0.895833	1	0.866667	0.958333	0.661765	0.6875	0.881356	0.75	0.644068	0.83871	0.586667	1	0.96875	0.885714	0.970149	0.989474	0.80558	0.787585
1155	0.927083	0.970588	0.933333	0.958333	0.617647	0.695312	0.881356	0.75	0.677966	0.870968	0.64	0.954545	0.96875	0.878571	0.985075	0.989474	0.81517	0.798143
1156	0.854167	1	0.933333	1	0.691176	0.71875	0.864407	0.821429	0.717514	0.935484	0.653333	1	0.9375	0.907143	0.985075	0.989474	0.83435	0.818952
1157	0.916667	0.970588	0.933333	1	0.617647	0.6875	0.864407	0.857143	0.666667	0.741935	0.666667	0.954545	0.96875	0.885714	0.970149	0.989474	0.817786	0.800666
1158	0.854167	0.970588	1	0.875	0.676471	0.609375	0.864407	0.809524	0.661017	0.870968	0.666667	0.909091	1	0.9	0.985075	0.989474	0.807323	0.789733
1159	0.916667	0.970588	0.866667	0.875	0.691176	0.65625	0.813559	0.821429	0.649718	0.741935	0.653333	1	1	0.9	0.985075	0.989474	0.810811	0.793245
1160	0.9375	1	1	0.958333	0.735294	0.671875	0.745763	0.77381	0.700565	0.903226	0.573333	0.954545	0.96875	0.892857	0.955224	0.989474	0.816914	0.799635
1161	0.927083	1	1	1	0.735294	0.742188	0.881356	0.761905	0.649718	0.935484	0.613333	0.954545	0.9375	0.9	1	0.989474	0.829119	0.813477
1162	0.9375	0.970588	0.933333	0.916667	0.632353	0.640625	0.813559	0.809524	0.706215	0.870968	0.586667	0.909091	1	0.885714	0.970149	0.989474	0.811683	0.793833
1163	0.916667	0.970588	1	0.958333	0.779412	0.632812	0.813559	0.821429	0.621469	0.741935	0.56	0.954545	0.96875	0.914286	0.970149	0.989474	0.80558	0.788121
1164	0.947917	1	1	0.958333	0.691176	0.640625	0.847458	0.809524	0.672316	0.83871	0.6	1	1	0.871429	0.955224	0.989474	0.814298	0.797102
1165	0.875	0.970588	0.933333	0.958333	0.720588	0.703125	0.847458	0.833333	0.706215	0.806452	0.613333	1	0.9375	0.871429	0.985075	0.989474	0.822145	0.805356
1166	0.875	1	1	1	0.647059	0.71875	0.847458	0.761905	0.649718	0.806452	0.746667	0.954545	0.96875	0.878571	0.985075	0.989474	0.817786	0.801248
1167	0.927083	0.970588	1	0.916667	0.661765	0.648438	0.881356	0.833333	0.661017	0.935484	0.68	0.954545	0.96875	0.907143	0.970149	0.989474	0.823017	0.806404
1168	0.958333	0.970588	1	0.958333	0.691176	0.664062	0.898305	0.797619	0.627119	0.967742	0.706667	1	1	0.907143	0.985075	1	0.829119	0.813497
1169	0.927083	0.970588	0.933333	0.916667	0.720588	0.640625	0.864407	0.761905	0.677966	0.935484	0.64	1	0.96875	0.878571	0.985075	0.989474	0.816914	0.80005
1170	0.947917	1	1	0.958333	0.602941	0.710938	0.864407	0.809524	0.689266	0.870968	0.6	0.954545	0.9375	0.892857	0.985075	0.989474	0.823017	0.806302
1171	0.875	1	0.933333	0.958333	0.617647	0.695312	0.847458	0.738095	0.649718	0.935484	0.76	0.954545	1	0.857143	0.970149	1	0.812554	0.795485
1172	0.916667	0.970588	0.933333	0.958333	0.735294	0.640625	0.881356	0.785714	0.700565	0.83871	0.586667	0.909091	0.96875	0.878571	0.955224	1	0.81517	0.79774
1173	0.927083	0.941176	0.866667	0.958333	0.779412	0.65625	0.79661	0.857143	0.700565	1	0.72	0.954545	0.96875	0.85	0.970149	0.989474	0.829991	0.814381
1174	0.895833	1	0.866667	1	0.705882	0.671875	0.830508	0.761905	0.661017	0.967742	0.693333	1	1	0.907143	1	0.989474	0.823888	0.807722
1175	0.927083	1	1	1	0.779412	0.59375	0.830508	0.797619	0.734463	0.870968	0.653333	1	0.90625	0.921429	1	0.989474	0.831735	0.815978
1176	0.875	0.970588	0.933333	0.958333	0.691176	0.632812	0.881356	0.857143	0.694915	0.935484	0.666667	1	0.96875	0.885714	0.985075	0.989474	0.823888	0.807405
1177	0.916667	1	0.933333	0.958333	0.705882	0.65625	0.847458	0.797619	0.683616	0.774194	0.72	0.954545	0.96875	0.9	0.985075	0.989474	0.823888	0.807632
1178	0.895833	1	1	1	0.647059	0.71875	0.932203	0.821429	0.672316	0.903226	0.68	1	0.96875	0.892857	0.970149	0.989474	0.831735	0.816279
1179	0.927083	0.970588	1	0.916667	0.544118	0.671875	0.813559	0.821429	0.677966	0.870968	0.613333	0.863636	0.9375	0.878571	1	0.989474	0.806452	0.788423
1180	0.885417	0.970588	0.933333	0.958333	0.735294	0.640625	0.864407	0.809524	0.694915	0.806452	0.693333	0.954545	0.96875	0.885714	0.985075	0.989474	0.821273	0.804617
1181	0.875	0.970588	1	0.958333	0.691176	0.664062	0.79661	0.797619	0.644068	0.903226	0.64	1	0.9375	0.907143	0.970149	0.989474	0.809939	0.792046
1182	0.895833	1	1	0.958333	0.75	0.625	0.898305	0.833333	0.677966	0.741935	0.64	0.909091	0.96875	0.9	0.985075	0.989474	0.819529	0.802542
1183	0.9375	1	0.866667	0.916667	0.632353	0.632812	0.881356	0.869048	0.627119	0.903226	0.666667	1	0.9375	0.892857	0.970149	0.989474	0.813426	0.796281
1184	0.916667	0.970588	0.933333	0.958333	0.75	0.671875	0.915254	0.809524	0.644068	0.935484	0.72	0.954545	0.9375	0.878571	0.985075	0.989474	0.826504	0.810589
1185	0.927083	1	0.933333	0.958333	0.676471	0.648438	0.847458	0.857143	0.694915	0.903226	0.653333	0.954545	0.96875	0.871429	0.985075	0.989474	0.823888	0.807599
1186	0.895833	0.970588	0.933333	1	0.735294	0.625	0.847458	0.809524	0.615819	0.870968	0.56	0.954545	0.96875	0.907143	0.985075	0.989474	0.803836	0.785926
1187	0.885417	0.970588	1	0.958333	0.705882	0.726562	0.847458	0.833333	0.717514	0.83871	0.666667	1	1	0.928571	0.985075	0.989474	0.840453	0.825711
1188	0.947917	0.970588	1	0.958333	0.602941	0.671875	0.898305	0.845238	0.677966	0.967742	0.773333	1	0.96875	0.878571	0.985075	0.989474	0.83435	0.819206
1189	0.864583	1	1	1	0.647059	0.617188	0.830508	0.833333	0.706215	0.903226	0.72	1	0.96875	0.885714	0.985075	0.989474	0.821273	0.804739
1190	0.90625	0.970588	1	1	0.529412	0.648438	0.881356	0.809524	0.649718	0.903226	0.68	0.954545	0.9375	0.914286	0.985075	0.989474	0.811683	0.794366
1191	0.927083	0.970588	1	0.916667	0.720588	0.71875	0.79661	0.833333	0.711864	0.903226	0.733333	1	1	0.871429	0.985075	0.989474	0.83871	0.823687
1192	0.9375	1	0.933333	0.958333	0.691176	0.71875	0.79661	0.809524	0.644068	0.903226	0.653333	1	1	0.842857	0.940299	0.989474	0.81517	0.798229
1193	0.916667	1	0.933333	0.916667	0.764706	0.632812	0.813559	0.857143	0.661017	0.903226	0.706667	1	1	0.871429	0.970149	0.989474	0.823017	0.806892
1194	0.90625	1	0.933333	0.916667	0.691176	0.640625	0.830508	0.797619	0.59887	0.935484	0.626667	0.909091	1	0.871429	0.985075	0.989474	0.800349	0.782132
1195	0.927083	0.970588	0.8	1	0.676471	0.71875	0.813559	0.869048	0.683616	0.903226	0.626667	1	0.96875	0.914286	1	0.989474	0.832607	0.817045
1196	0.864583	1	1	1	0.602941	0.671875	0.881356	0.797619	0.638418	0.903226	0.68	0.954545	0.90625	0.907143	0.985075	0.989474	0.811683	0.794494
1197	0.916667	1	1	0.875	0.573529	0.6875	0.847458	0.833333	0.610169	0.806452	0.706667	0.954545	0.96875	0.907143	0.970149	0.989474	0.809939	0.792539
1198	0.927083	1	0.866667	1	0.647059	0.671875	0.813559	0.869048	0.672316	0.806452	0.64	1	0.96875	0.921429	0.985075	0.989474	0.823888	0.807603
1199	0.9375	1	0.866667	0.916667	0.808824	0.679688	0.762712	0.761905	0.689266	0.774194	0.773333	0.954545	1	0.892857	0.955224	0.989474	0.828248	0.812303
1200	0.9375	0.970588	0.933333	0.916667	0.647059	0.703125	0.847458	0.833333	0.689266	0.83871	0.68	0.909091	1	0.892857	0.985075	0.989474	0.827376	0.811089
1201	0.90625	1	0.933333	0.958333	0.720588	0.71875	0.847458	0.821429	0.683616	0.870968	0.693333	1	1	0.892857	0.970149	0.989474	0.833479	0.818032
1202	0.90625	1	0.933333	0.875	0.75	0.703125	0.881356	0.845238	0.683616	0.870968	0.653333	0.954545	1	0.892857	0.985075	0.989474	0.832607	0.816934
1203	0.9375	0.970588	0.933333	0.958333	0.661765	0.703125	0.830508	0.821429	0.666667	0.935484	0.653333	0.909091	0.9375	0.878571	1	0.989474	0.822145	0.805651
1204	0.916667	0.970588	1	1	0.617647	0.679688	0.762712	0.833333	0.694915	0.806452	0.733333	0.863636	0.96875	0.885714	0.985075	0.989474	0.820401	0.803714
1205	0.90625	0.970588	1	0.916667	0.705882	0.625	0.813559	0.785714	0.661017	0.870968	0.68	1	0.96875	0.9	0.985075	0.989474	0.813426	0.795797
1206	0.958333	0.970588	1	1	0.676471	0.617188	0.830508	0.833333	0.723164	0.806452	0.693333	0.954545	0.96875	0.871429	0.985075	0.989474	0.825632	0.809279
1207	0.875	0.941176	1	0.916667	0.705882	0.679688	0.813559	0.785714	0.666667	1	0.693333	1	0.96875	0.907143	0.985075	0.989474	0.822145	0.80582
1208	0.958333	0.970588	0.933333	0.958333	0.691176	0.648438	0.847458	0.857143	0.655367	0.870968	0.653333	1	0.90625	0.907143	0.985075	0.989474	0.823017	0.80655
1209	0.895833	1	1	0.958333	0.647059	0.664062	0.813559	0.880952	0.689266	0.903226	0.64	0.954545	1	0.907143	0.955224	0.989474	0.823888	0.807356
1210	0.9375	1	0.933333	0.916667	0.720588	0.679688	0.79661	0.761905	0.683616	0.935484	0.72	0.909091	0.90625	0.885714	0.970149	0.989474	0.822145	0.805757
1211	0.90625	1	1	0.916667	0.779412	0.703125	0.813559	0.738095	0.672316	0.870968	0.666667	1	0.96875	0.864286	0.985075	0.989474	0.820401	0.803784
1212	0.875	1	0.933333	0.916667	0.602941	0.578125	0.813559	0.809524	0.689266	0.967742	0.693333	1	1	0.878571	0.970149	0.989474	0.806452	0.788215
1213	0.927083	0.970588	0.933333	0.916667	0.617647	0.726562	0.830508	0.785714	0.706215	1	0.693333	1	0.9375	0.885714	0.985075	0.989474	0.829991	0.81427
1214	0.927083	1	1	1	0.691176	0.703125	0.864407	0.857143	0.649718	0.967742	0.773333	1	0.9375	0.914286	0.985075	0.989474	0.841325	0.826745
1215	0.90625	1	0.933333	0.916667	0.647059	0.695312	0.779661	0.809524	0.649718	0.903226	0.68	1	0.9375	0.885714	0.985075	0.989474	0.814298	0.797013
1216	0.90625	1	0.933333	0.916667	0.661765	0.765625	0.864407	0.845238	0.677966	0.806452	0.653333	0.954545	0.96875	0.9	1	0.989474	0.832607	0.817269
1217	0.895833	1	1	0.958333	0.691176	0.65625	0.864407	0.880952	0.706215	0.870968	0.666667	0.863636	0.96875	0.892857	0.970149	0.989474	0.828248	0.812007
1218	0.916667	1	1	0.916667	0.676471	0.601562	0.779661	0.809524	0.644068	0.903226	0.666667	1	0.96875	0.9	1	0.989474	0.809067	0.791461
1219	0.927083	1	1	0.916667	0.75	0.703125	0.881356	0.77381	0.711864	0.83871	0.666667	1	0.9375	0.878571	0.985075	0.989474	0.832607	0.817252
1220	0.90625	1	1	0.875	0.676471	0.664062	0.779661	0.821429	0.677966	0.935484	0.746667	1	1	0.864286	0.970149	0.989474	0.821273	0.804636
1221	0.885417	0.970588	0.866667	1	0.661765	0.71875	0.864407	0.845238	0.644068	0.903226	0.693333	1	0.90625	0.878571	0.970149	0.989474	0.820401	0.804032
1222	0.9375	0.970588	1	0.958333	0.75	0.601562	0.864407	0.857143	0.672316	0.903226	0.573333	0.954545	0.96875	0.892857	0.985075	0.989474	0.818657	0.801968
1223	0.916667	0.970588	0.933333	0.916667	0.661765	0.664062	0.881356	0.880952	0.661017	0.83871	0.626667	1	0.96875	0.914286	0.985075	0.989474	0.823017	0.807025
1224	0.895833	1	1	0.875	0.632353	0.671875	0.847458	0.77381	0.672316	0.870968	0.573333	0.954545	1	0.892857	0.955224	0.989474	0.806452	0.788504
1225	0.885417	0.970588	1	1	0.676471	0.695312	0.847458	0.833333	0.683616	0.870968	0.64	1	0.9375	0.871429	0.985075	0.989474	0.821273	0.804506
1226	0.927083	1	0.933333	0.958333	0.661765	0.679688	0.864407	0.761905	0.60452	0.83871	0.64	0.909091	1	0.9	0.955224	1	0.806452	0.788256
1227	0.90625	1	0.933333	0.958333	0.691176	0.648438	0.881356	0.821429	0.706215	0.935484	0.786667	0.954545	1	0.907143	0.970149	0.989474	0.837838	0.822418
1228	0.854167	0.970588	1	0.916667	0.764706	0.648438	0.847458	0.821429	0.689266	0.870968	0.773333	0.909091	1	0.9	0.955224	0.989474	0.827376	0.811216
1229	0.875	1	0.933333	0.958333	0.735294	0.695312	0.864407	0.880952	0.60452	0.903226	0.706667	0.954545	0.96875	0.9	0.985075	0.989474	0.823888	0.807652
1230	0.90625	1	1	0.958333	0.705882	0.664062	0.847458	0.833333	0.694915	0.903226	0.693333	0.909091	0.9375	0.892857	0.970149	0.989474	0.827376	0.81121
1231	0.916667	0.970588	0.933333	0.958333	0.735294	0.617188	0.915254	0.833333	0.638418	0.903226	0.72	1	0.9375	0.9	0.970149	0.989474	0.822145	0.805569
1232	0.854167	1	1	1	0.75	0.664062	0.881356	0.833333	0.723164	0.903226	0.706667	0.954545	1	0.892857	0.970149	0.989474	0.836094	0.820656
1233	0.875	1	0.933333	0.958333	0.779412	0.703125	0.881356	0.845238	0.683616	0.774194	0.72	1	0.96875	0.871429	0.985075	0.989474	0.832607	0.817117
1234	0.927083	1	0.933333	0.916667	0.661765	0.75	0.898305	0.821429	0.672316	0.870968	0.706667	0.909091	1	0.914286	0.970149	0.989474	0.836966	0.822018
1235	0.864583	0.970588	0.933333	0.875	0.632353	0.648438	0.79661	0.857143	0.683616	0.903226	0.613333	0.909091	0.96875	0.864286	0.985075	0.989474	0.804708	0.786378
1236	0.895833	0.970588	1	0.916667	0.75	0.65625	0.847458	0.821429	0.694915	0.903226	0.64	1	0.90625	0.892857	1	0.989474	0.82476	0.808279
1237	0.927083	0.970588	0.933333	1	0.647059	0.695312	0.847458	0.857143	0.655367	0.903226	0.68	1	0.96875	0.907143	0.985075	0.989474	0.828248	0.812501
1238	0.947917	0.970588	0.933333	1	0.691176	0.6875	0.932203	0.904762	0.706215	0.967742	0.693333	0.954545	0.96875	0.892857	0.985075	1	0.8483	0.834091
1239	0.927083	1	0.933333	0.916667	0.735294	0.6875	0.847458	0.845238	0.661017	0.83871	0.6	0.954545	1	0.885714	0.910448	0.989474	0.817786	0.800768
1240	0.895833	0.970588	0.933333	0.958333	0.588235	0.6875	0.898305	0.845238	0.615819	0.903226	0.653333	0.954545	1	0.907143	0.955224	0.989474	0.812554	0.79534
1241	0.916667	0.970588	1	0.958333	0.691176	0.640625	0.830508	0.857143	0.700565	0.870968	0.693333	1	0.96875	0.921429	0.985075	1	0.832607	0.816896
1242	0.916667	1	0.933333	1	0.691176	0.648438	0.915254	0.821429	0.661017	0.806452	0.746667	0.909091	0.96875	0.878571	0.955224	0.989474	0.822145	0.805783
1243	0.958333	0.970588	1	0.916667	0.75	0.6875	0.79661	0.809524	0.655367	0.774194	0.693333	0.954545	1	0.857143	0.925373	0.989474	0.816914	0.799659
1244	0.895833	1	1	0.916667	0.764706	0.671875	0.762712	0.880952	0.666667	0.870968	0.64	0.954545	0.96875	0.878571	1	0.989474	0.822145	0.805622
1245	0.895833	1	0.933333	0.916667	0.632353	0.6875	0.898305	0.857143	0.632768	0.774194	0.626667	1	0.9375	0.9	0.985075	0.989474	0.813426	0.796227
1246	0.947917	0.970588	0.933333	0.916667	0.676471	0.625	0.813559	0.857143	0.666667	0.774194	0.733333	0.954545	0.96875	0.878571	0.985075	0.989474	0.817786	0.800605
1247	0.9375	0.970588	0.933333	0.958333	0.794118	0.65625	0.830508	0.833333	0.728814	0.83871	0.733333	0.954545	1	0.814286	0.985075	0.989474	0.831735	0.816005
1248	0.927083	0.970588	0.933333	0.916667	0.676471	0.65625	0.813559	0.833333	0.672316	0.870968	0.68	0.954545	1	0.9	0.925373	0.989474	0.817786	0.800631
1249	0.927083	0.970588	0.933333	0.916667	0.632353	0.65625	0.864407	0.857143	0.717514	0.935484	0.693333	0.954545	0.90625	0.9	0.970149	0.989474	0.829119	0.812988
1250	0.90625	0.941176	1	0.916667	0.676471	0.671875	0.898305	0.833333	0.666667	0.967742	0.693333	1	0.96875	0.878571	0.985075	0.989474	0.825632	0.809251
1251	0.90625	1	1	0.916667	0.764706	0.65625	0.762712	0.845238	0.666667	0.967742	0.693333	1	1	0.907143	0.955224	0.989474	0.827376	0.811519
1252	0.885417	1	0.933333	0.916667	0.75	0.695312	0.898305	0.809524	0.644068	0.83871	0.6	1	0.96875	0.892857	0.985075	0.989474	0.818657	0.801896
1253	0.916667	1	0.933333	1	0.676471	0.726562	0.847458	0.785714	0.587571	0.83871	0.76	0.954545	0.9375	0.857143	0.970149	0.989474	0.812554	0.795526
1254	0.916667	1	0.933333	0.916667	0.808824	0.617188	0.847458	0.892857	0.700565	0.774194	0.746667	0.954545	0.9375	0.871429	0.970149	0.989474	0.830863	0.81503
1255	0.916667	1	1	1	0.794118	0.65625	0.864407	0.809524	0.666667	0.903226	0.666667	1	1	0.885714	0.970149	0.989474	0.829119	0.813243
1256	0.9375	1	0.933333	1	0.779412	0.648438	0.898305	0.845238	0.700565	0.903226	0.64	0.954545	0.90625	0.871429	0.985075	0.989474	0.831735	0.816131
1257	0.927083	1	1	1	0.705882	0.679688	0.847458	0.785714	0.655367	0.774194	0.746667	1	1	0.878571	0.970149	0.989474	0.823888	0.807604
1258	0.854167	1	1	1	0.676471	0.679688	0.864407	0.833333	0.706215	0.870968	0.613333	0.954545	1	0.9	0.970149	0.989474	0.823888	0.807406
1259	0.947917	0.970588	1	0.916667	0.779412	0.617188	0.830508	0.77381	0.632768	0.935484	0.6	0.954545	0.96875	0.871429	0.985075	0.989474	0.808195	0.790492
1260	0.916667	1	1	0.958333	0.720588	0.617188	0.779661	0.845238	0.706215	0.741935	0.666667	0.909091	0.96875	0.892857	0.985075	0.989474	0.818657	0.801502
1261	0.916667	1	1	0.875	0.720588	0.664062	0.830508	0.821429	0.717514	0.870968	0.72	0.954545	1	0.9	0.925373	0.989474	0.830863	0.815237
1262	0.927083	1	1	1	0.75	0.6875	0.898305	0.869048	0.632768	0.967742	0.613333	0.954545	0.9375	0.9	0.985075	0.989474	0.829991	0.814529
1263	0.895833	1	1	0.916667	0.705882	0.703125	0.847458	0.809524	0.672316	0.870968	0.746667	1	0.9375	0.871429	1	0.989474	0.828248	0.812476
1264	0.927083	1	0.933333	0.958333	0.632353	0.601562	0.830508	0.785714	0.694915	0.870968	0.706667	1	1	0.878571	0.985075	0.989474	0.81517	0.797789
1265	0.895833	0.970588	0.933333	0.875	0.647059	0.664062	0.864407	0.869048	0.672316	0.935484	0.653333	0.909091	0.9375	0.871429	0.985075	0.989474	0.816042	0.798964
1266	0.854167	1	0.933333	0.958333	0.764706	0.640625	0.762712	0.833333	0.59322	0.903226	0.653333	0.909091	1	0.885714	0.985075	0.989474	0.802092	0.78406
1267	0.895833	1	1	0.958333	0.573529	0.617188	0.847458	0.809524	0.677966	0.870968	0.733333	1	0.9375	0.878571	0.985075	0.989474	0.811683	0.794132
1268	0.96875	1	1	0.916667	0.632353	0.6875	0.864407	0.821429	0.661017	0.870968	0.626667	1	0.96875	0.878571	0.955224	0.989474	0.819529	0.802939
1269	0.9375	1	1	0.916667	0.632353	0.664062	0.79661	0.857143	0.655367	0.774194	0.773333	0.954545	0.96875	0.921429	0.970149	0.989474	0.82476	0.808568
1270	0.90625	0.970588	0.933333	0.958333	0.75	0.695312	0.864407	0.821429	0.677966	0.935484	0.706667	0.954545	1	0.885714	0.985075	0.989474	0.833479	0.818094
1271	0.9375	1	1	1	0.691176	0.710938	0.847458	0.880952	0.672316	0.903226	0.666667	0.909091	0.96875	0.885714	0.955224	0.989474	0.832607	0.817464
1272	0.927083	1	1	0.875	0.691176	0.664062	0.779661	0.869048	0.655367	0.903226	0.68	1	0.96875	0.871429	0.955224	0.989474	0.817786	0.801198
1273	0.96875	1	1	0.958333	0.720588	0.617188	0.847458	0.833333	0.677966	0.967742	0.746667	1	0.96875	0.921429	0.985075	0.989474	0.837838	0.822734
1274	0.927083	0.970588	0.933333	1	0.602941	0.625	0.745763	0.77381	0.677966	0.774194	0.72	0.954545	1	0.878571	0.970149	0.989474	0.804708	0.786409
1275	0.916667	0.970588	1	1	0.705882	0.65625	0.745763	0.833333	0.683616	0.870968	0.693333	1	0.9375	0.864286	0.970149	0.989474	0.817786	0.800725
1276	0.885417	0.970588	0.933333	0.916667	0.705882	0.695312	0.898305	0.857143	0.661017	0.870968	0.666667	0.954545	0.96875	0.9	0.985075	0.989474	0.826504	0.810222
1277	0.916667	0.970588	0.933333	0.958333	0.661765	0.71875	0.898305	0.785714	0.728814	0.903226	0.68	0.954545	1	0.878571	0.970149	0.989474	0.83435	0.8187
1278	0.916667	1	1	0.958333	0.838235	0.617188	0.847458	0.821429	0.683616	0.774194	0.706667	0.909091	1	0.885714	0.985075	0.989474	0.827376	0.811571
1279	0.947917	0.970588	0.866667	0.916667	0.676471	0.71875	0.830508	0.833333	0.627119	0.774194	0.706667	0.954545	0.90625	0.914286	0.955224	0.989474	0.819529	0.80267
1280	0.916667	1	0.933333	0.958333	0.676471	0.679688	0.79661	0.845238	0.700565	0.677419	0.72	0.954545	0.9375	0.914286	0.985075	0.989474	0.826504	0.810072
1281	0.895833	1	1	1	0.75	0.6875	0.830508	0.916667	0.666667	0.870968	0.72	0.954545	0.90625	0.892857	0.985075	0.989474	0.835222	0.820144
1282	0.90625	0.970588	0.866667	0.958333	0.632353	0.734375	0.932203	0.845238	0.677966	0.935484	0.693333	0.818182	1	0.885714	0.970149	0.989474	0.830863	0.815522
1283	0.895833	1	1	1	0.602941	0.664062	0.79661	0.857143	0.672316	0.870968	0.64	0.954545	0.96875	0.885714	0.970149	0.989474	0.813426	0.796079
1284	0.90625	0.970588	1	1	0.676471	0.710938	0.779661	0.869048	0.632768	0.870968	0.76	0.909091	0.96875	0.878571	0.955224	0.989474	0.822145	0.80605
1285	0.895833	1	1	0.958333	0.75	0.632812	0.779661	0.845238	0.666667	0.806452	0.706667	1	1	0.907143	0.970149	0.989474	0.822145	0.805593
1286	0.875	1	0.933333	0.958333	0.735294	0.703125	0.79661	0.809524	0.683616	0.83871	0.693333	1	0.96875	0.885714	0.985075	0.989474	0.82476	0.808215
1287	0.916667	0.970588	0.933333	0.958333	0.602941	0.664062	0.864407	0.845238	0.689266	0.870968	0.613333	1	1	0.878571	0.985075	0.989474	0.817786	0.800693
1288	0.885417	0.970588	0.933333	0.916667	0.735294	0.671875	0.864407	0.857143	0.717514	0.774194	0.68	0.954545	0.9375	0.921429	0.970149	0.989474	0.831735	0.816033
1289	0.895833	1	0.933333	0.916667	0.676471	0.65625	0.898305	0.821429	0.700565	0.870968	0.626667	0.954545	0.9375	0.871429	0.970149	0.989474	0.817786	0.800674
1290	0.927083	1	1	0.958333	0.632353	0.648438	0.745763	0.785714	0.711864	0.774194	0.653333	1	0.96875	0.914286	0.970149	0.989474	0.816042	0.798577
1291	0.916667	0.970588	0.933333	1	0.691176	0.726562	0.881356	0.892857	0.649718	0.935484	0.533333	0.954545	1	0.9	0.985075	0.989474	0.827376	0.811511
1292	0.927083	1	1	0.916667	0.588235	0.664062	0.847458	0.857143	0.689266	0.741935	0.6	0.954545	0.9375	0.878571	0.955224	0.989474	0.809939	0.792068
1293	0.927083	0.970588	0.933333	1	0.779412	0.609375	0.762712	0.845238	0.683616	0.870968	0.72	1	0.96875	0.9	0.985075	0.989474	0.826504	0.810286
1294	0.885417	0.970588	0.933333	0.916667	0.779412	0.65625	0.830508	0.869048	0.672316	0.870968	0.693333	1	1	0.9	0.985075	0.989474	0.829119	0.813422
1295	0.947917	0.970588	1	0.958333	0.617647	0.6875	0.79661	0.833333	0.649718	0.870968	0.626667	0.954545	1	0.878571	0.970149	0.989474	0.813426	0.796358
1296	0.9375	0.970588	1	0.958333	0.75	0.671875	0.864407	0.880952	0.627119	0.903226	0.693333	1	0.96875	0.928571	0.985075	0.989474	0.83435	0.819142
1297	0.90625	1	1	0.875	0.705882	0.640625	0.830508	0.785714	0.649718	0.903226	0.693333	1	1	0.885714	0.985075	0.989474	0.81517	0.798013
1298	0.9375	1	1	0.958333	0.676471	0.632812	0.813559	0.845238	0.638418	0.935484	0.666667	0.954545	1	0.885714	0.955224	0.989474	0.81517	0.798089
1299	0.947917	0.970588	0.933333	1	0.720588	0.695312	0.813559	0.809524	0.655367	0.870968	0.733333	0.909091	0.9375	0.892857	0.985075	0.989474	0.827376	0.811438
1300	0.895833	0.970588	1	1	0.691176	0.742188	0.762712	0.785714	0.666667	0.903226	0.64	1	1	0.878571	0.985075	0.989474	0.821273	0.804846
1301	0.916667	1	1	0.958333	0.647059	0.609375	0.813559	0.904762	0.661017	0.870968	0.64	0.954545	0.9375	0.928571	0.970149	0.989474	0.817786	0.800898
1302	0.96875	0.970588	1	0.958333	0.705882	0.726562	0.779661	0.785714	0.672316	0.806452	0.76	1	1	0.907143	0.985075	0.989474	0.836094	0.820955
1303	0.885417	1	0.933333	0.916667	0.647059	0.703125	0.881356	0.797619	0.728814	0.903226	0.573333	1	1	0.9	0.985075	0.989474	0.826504	0.810316
1304	0.90625	0.941176	1	0.958333	0.647059	0.679688	0.881356	0.821429	0.700565	0.870968	0.666667	1	0.9375	0.892857	0.955224	0.989474	0.823888	0.807366
1305	0.927083	0.970588	0.933333	0.916667	0.705882	0.679688	0.847458	0.821429	0.694915	0.903226	0.626667	0.954545	0.96875	0.864286	0.970149	0.989474	0.821273	0.804802
1306	0.958333	1	0.933333	0.916667	0.691176	0.695312	0.881356	0.75	0.677966	0.83871	0.613333	0.954545	0.96875	0.871429	1	0.989474	0.819529	0.802582
1307	0.9375	1	1	0.875	0.632353	0.648438	0.864407	0.880952	0.655367	0.806452	0.706667	1	1	0.892857	0.985075	0.989474	0.823017	0.806454
1308	0.90625	0.970588	0.933333	0.916667	0.794118	0.664062	0.779661	0.785714	0.694915	0.870968	0.64	0.954545	0.96875	0.878571	0.985075	0.989474	0.819529	0.802692
1309	0.927083	0.970588	1	0.958333	0.705882	0.703125	0.864407	0.880952	0.661017	0.967742	0.666667	0.954545	0.96875	0.907143	0.985075	0.989474	0.836094	0.821278
1310	0.947917	1	1	0.958333	0.720588	0.632812	0.847458	0.833333	0.615819	0.903226	0.626667	1	0.96875	0.9	0.985075	1	0.816914	0.800182
1311	0.90625	0.970588	1	0.958333	0.720588	0.710938	0.864407	0.845238	0.655367	0.903226	0.76	1	0.96875	0.871429	0.955224	0.989474	0.831735	0.816076
1312	0.854167	0.941176	0.933333	0.958333	0.647059	0.648438	0.745763	0.797619	0.694915	0.967742	0.733333	0.909091	1	0.885714	0.955224	0.989474	0.811683	0.794261
1313	0.895833	0.941176	0.933333	0.958333	0.676471	0.632812	0.813559	0.72619	0.700565	0.870968	0.666667	1	0.96875	0.871429	0.955224	0.989474	0.806452	0.788161
1314	0.895833	1	1	0.916667	0.75	0.664062	0.762712	0.880952	0.677966	0.806452	0.653333	0.954545	1	0.871429	0.955224	0.989474	0.818657	0.801871
1315	0.895833	0.970588	1	1	0.647059	0.679688	0.79661	0.785714	0.700565	0.83871	0.693333	1	1	0.9	0.985075	0.989474	0.823017	0.806452
1316	0.895833	1	1	0.916667	0.705882	0.609375	0.79661	0.845238	0.689266	0.870968	0.68	0.909091	1	0.907143	0.970149	0.989474	0.818657	0.801821
1317	0.90625	0.970588	0.933333	0.916667	0.661765	0.679688	0.864407	0.857143	0.683616	0.903226	0.653333	0.909091	1	0.9	1	0.989474	0.826504	0.810355
1318	0.885417	0.970588	1	0.958333	0.764706	0.679688	0.830508	0.880952	0.683616	0.935484	0.693333	1	0.9375	0.878571	0.970149	0.989474	0.831735	0.81661
1319	0.947917	1	1	0.916667	0.691176	0.671875	0.79661	0.857143	0.683616	0.870968	0.653333	0.954545	0.9375	0.885714	0.970149	0.989474	0.823888	0.807376
1320	0.9375	0.970588	0.933333	0.916667	0.735294	0.632812	0.881356	0.833333	0.740113	0.806452	0.706667	0.954545	1	0.885714	0.955224	0.989474	0.833479	0.817788
1321	0.90625	1	1	1	0.617647	0.6875	0.898305	0.75	0.655367	0.935484	0.653333	1	1	0.907143	0.970149	0.989474	0.819529	0.802859
1322	0.895833	1	0.933333	1	0.661765	0.6875	0.79661	0.904762	0.689266	0.903226	0.693333	0.954545	0.9375	0.892857	0.955224	0.989474	0.828248	0.812573
1323	0.9375	1	0.933333	0.958333	0.720588	0.695312	0.864407	0.928571	0.661017	0.935484	0.666667	1	1	0.928571	0.985075	0.989474	0.843941	0.829625
1324	0.916667	0.970588	1	0.916667	0.720588	0.609375	0.813559	0.869048	0.677966	0.774194	0.733333	1	0.96875	0.885714	0.970149	0.989474	0.820401	0.803703
1325	0.9375	0.970588	0.933333	0.916667	0.661765	0.695312	0.898305	0.797619	0.632768	0.83871	0.666667	0.909091	0.9375	0.928571	0.955224	0.989474	0.818657	0.80185
1326	0.895833	1	1	1	0.647059	0.65625	0.881356	0.869048	0.666667	0.903226	0.68	0.954545	0.96875	0.878571	0.970149	0.989474	0.822145	0.805775
1327	0.916667	1	0.933333	0.958333	0.705882	0.640625	0.830508	0.833333	0.672316	0.903226	0.626667	0.954545	0.96875	0.907143	0.985075	0.989474	0.820401	0.80396
1328	0.895833	1	0.933333	0.875	0.735294	0.664062	0.813559	0.761905	0.745763	0.806452	0.746667	0.863636	0.96875	0.9	0.955224	0.989474	0.827376	0.811337
1329	0.927083	1	1	1	0.720588	0.742188	0.932203	0.869048	0.677966	0.83871	0.653333	1	1	0.9	0.985075	0.989474	0.844813	0.830773
1330	0.895833	0.970588	0.933333	0.875	0.661765	0.710938	0.830508	0.833333	0.711864	0.870968	0.6	1	0.96875	0.871429	1	0.989474	0.822145	0.805542
1331	0.947917	1	1	0.958333	0.735294	0.6875	0.864407	0.809524	0.723164	0.903226	0.693333	1	1	0.871429	0.985075	0.989474	0.840453	0.825674
1332	0.916667	1	0.933333	0.916667	0.705882	0.664062	0.864407	0.821429	0.666667	0.774194	0.64	0.954545	1	0.885714	0.970149	0.989474	0.816914	0.799894
1333	0.9375	1	0.933333	0.958333	0.661765	0.648438	0.915254	0.785714	0.711864	0.903226	0.6	0.954545	1	0.914286	0.940299	0.989474	0.82476	0.80812
1334	0.895833	0.970588	0.933333	0.958333	0.764706	0.664062	0.847458	0.809524	0.677966	0.774194	0.64	1	1	0.892857	0.985075	0.989474	0.821273	0.804718
1335	0.916667	0.970588	1	0.916667	0.647059	0.632812	0.847458	0.761905	0.666667	0.935484	0.693333	0.954545	0.96875	0.878571	0.970149	0.989474	0.810811	0.793343
1336	0.947917	0.970588	1	0.958333	0.676471	0.640625	0.79661	0.904762	0.694915	0.870968	0.773333	0.954545	0.96875	0.878571	0.970149	0.989474	0.832607	0.817103
1337	0.875	1	0.933333	0.958333	0.75	0.679688	0.847458	0.833333	0.689266	0.935484	0.666667	1	0.96875	0.892857	0.985075	0.989474	0.829991	0.814111
1338	0.864583	1	0.933333	0.916667	0.852941	0.632812	0.864407	0.892857	0.706215	0.806452	0.666667	0.954545	0.9375	0.885714	0.985075	0.989474	0.830863	0.814837
1339	0.885417	1	1	0.958333	0.602941	0.742188	0.847458	0.892857	0.700565	0.903226	0.706667	0.954545	0.96875	0.914286	0.970149	0.989474	0.83871	0.823771
1340	0.927083	1	0.933333	0.958333	0.705882	0.601562	0.830508	0.833333	0.728814	0.870968	0.733333	0.954545	0.96875	0.921429	1	0.989474	0.83435	0.81896
1341	0.895833	1	1	0.916667	0.705882	0.679688	0.864407	0.845238	0.666667	0.774194	0.68	1	0.9375	0.914286	0.985075	0.989474	0.825632	0.809685
1342	0.90625	0.970588	0.933333	0.958333	0.691176	0.617188	0.881356	0.821429	0.683616	0.83871	0.733333	0.954545	0.96875	0.864286	0.970149	0.989474	0.817786	0.800672
1343	0.927083	1	0.933333	0.916667	0.705882	0.664062	0.847458	0.833333	0.661017	0.870968	0.666667	0.863636	0.9375	0.892857	0.985075	0.989474	0.819529	0.802894
1344	0.854167	0.970588	1	0.916667	0.691176	0.6875	0.79661	0.821429	0.711864	0.83871	0.693333	0.954545	1	0.914286	0.970149	0.989474	0.825632	0.809222
1345	0.916667	1	1	0.958333	0.705882	0.609375	0.898305	0.845238	0.644068	0.870968	0.613333	0.954545	0.96875	0.878571	0.985075	0.989474	0.812554	0.794919
1346	0.90625	0.970588	0.933333	0.958333	0.676471	0.640625	0.762712	0.869048	0.649718	0.903226	0.706667	0.954545	0.9375	0.871429	0.970149	0.989474	0.811683	0.794129
1347	0.916667	1	1	0.875	0.661765	0.703125	0.813559	0.857143	0.655367	0.903226	0.6	0.909091	1	0.864286	0.985075	0.989474	0.81517	0.798113
1348	0.947917	1	0.933333	0.916667	0.676471	0.679688	0.898305	0.821429	0.734463	0.806452	0.653333	0.954545	0.96875	0.878571	0.985075	0.989474	0.832607	0.816897
1349	0.927083	1	1	0.958333	0.720588	0.65625	0.847458	0.785714	0.666667	0.83871	0.653333	1	0.96875	0.885714	0.985075	1	0.820401	0.803665
1350	0.885417	1	1	0.875	0.720588	0.664062	0.881356	0.785714	0.649718	0.903226	0.733333	1	1	0.892857	0.985075	0.989474	0.823017	0.806533
1351	0.864583	1	1	0.958333	0.705882	0.609375	0.881356	0.833333	0.655367	0.967742	0.68	1	1	0.885714	0.955224	0.989474	0.816042	0.799295
1352	0.9375	0.970588	1	1	0.676471	0.617188	0.915254	0.833333	0.666667	0.774194	0.786667	1	1	0.878571	0.970149	0.989474	0.826504	0.810531
1353	0.9375	1	1	0.958333	0.632353	0.625	0.881356	0.880952	0.694915	0.870968	0.72	0.954545	0.9375	0.914286	0.940299	0.989474	0.829119	0.813254
1354	0.916667	0.970588	1	1	0.661765	0.609375	0.813559	0.833333	0.632768	0.741935	0.626667	0.909091	0.9375	0.878571	0.955224	0.989474	0.796861	0.77778
1355	0.885417	1	0.933333	0.916667	0.573529	0.632812	0.813559	0.821429	0.689266	0.870968	0.613333	1	0.96875	0.878571	0.985075	0.989474	0.804708	0.786313
1356	0.90625	0.970588	1	0.958333	0.691176	0.671875	0.830508	0.857143	0.655367	0.903226	0.64	0.954545	1	0.921429	0.970149	0.989474	0.823888	0.807638
1357	0.875	1	1	0.958333	0.735294	0.6875	0.881356	0.833333	0.700565	0.741935	0.6	0.954545	0.9375	0.9	0.955224	0.989474	0.822145	0.80573
1358	0.916667	1	0.933333	0.958333	0.617647	0.617188	0.864407	0.833333	0.666667	0.774194	0.693333	1	1	0.878571	0.955224	0.989474	0.810811	0.793228
1359	0.9375	1	1	1	0.676471	0.59375	0.881356	0.821429	0.666667	0.83871	0.533333	0.954545	0.9375	0.885714	0.970149	0.989474	0.80558	0.787375
1360	0.895833	0.970588	0.933333	0.958333	0.75	0.632812	0.915254	0.833333	0.694915	0.967742	0.733333	0.954545	0.96875	0.871429	0.985075	1	0.832607	0.816908
1361	0.885417	1	1	0.958333	0.779412	0.6875	0.813559	0.916667	0.649718	0.774194	0.733333	1	1	0.885714	0.985075	0.989474	0.832607	0.817512
1362	0.947917	1	1	0.958333	0.75	0.679688	0.864407	0.833333	0.711864	0.774194	0.666667	0.954545	0.9375	0.907143	1	0.989474	0.837838	0.822678
1363	0.885417	0.970588	0.933333	0.916667	0.75	0.703125	0.830508	0.821429	0.661017	0.870968	0.626667	0.954545	0.90625	0.871429	0.970149	0.989474	0.81517	0.798051
1364	0.864583	0.970588	0.933333	1	0.632353	0.671875	0.898305	0.833333	0.638418	0.870968	0.546667	1	0.96875	0.857143	0.985075	0.989474	0.802092	0.783772
1365	0.916667	1	0.933333	1	0.720588	0.765625	0.779661	0.869048	0.700565	0.83871	0.693333	1	0.96875	0.921429	0.970149	0.989474	0.844813	0.830471
1366	0.885417	0.970588	0.933333	0.958333	0.676471	0.601562	0.813559	0.845238	0.649718	0.806452	0.733333	0.954545	0.9375	0.878571	0.970149	0.989474	0.806452	0.788846
1367	0.90625	1	0.933333	0.875	0.75	0.617188	0.813559	0.857143	0.621469	0.870968	0.706667	1	0.96875	0.871429	0.985075	0.989474	0.811683	0.794151
1368	0.885417	1	0.933333	0.916667	0.735294	0.664062	0.847458	0.77381	0.60452	0.741935	0.72	0.909091	0.96875	0.921429	0.985075	0.989474	0.809939	0.792359
1369	0.9375	0.970588	1	0.916667	0.823529	0.671875	0.847458	0.869048	0.661017	0.870968	0.746667	0.954545	0.9375	0.928571	0.985075	0.989474	0.842197	0.827635
1370	0.90625	1	1	0.958333	0.676471	0.640625	0.813559	0.833333	0.627119	0.935484	0.746667	0.954545	0.9375	0.885714	0.985075	0.989474	0.816042	0.79909
1371	0.927083	0.970588	0.933333	1	0.705882	0.671875	0.881356	0.809524	0.689266	0.967742	0.773333	1	0.9375	0.871429	0.985075	0.989474	0.835222	0.819958
1372	0.885417	1	0.933333	0.875	0.705882	0.5625	0.966102	0.797619	0.700565	0.870968	0.68	0.954545	0.9375	0.914286	0.955224	1	0.817786	0.800778
1373	0.895833	1	1	0.958333	0.764706	0.671875	0.79661	0.785714	0.677966	0.935484	0.68	1	0.90625	0.9	1	0.989474	0.825632	0.80956
1374	0.927083	1	1	0.916667	0.794118	0.640625	0.847458	0.892857	0.621469	0.870968	0.626667	1	1	0.892857	0.955224	0.989474	0.821273	0.805176
1375	0.90625	0.970588	1	0.958333	0.735294	0.664062	0.898305	0.892857	0.649718	0.741935	0.733333	1	0.96875	0.892857	0.955224	0.989474	0.828248	0.81228
1376	0.90625	1	0.933333	0.958333	0.647059	0.609375	0.864407	0.869048	0.615819	0.903226	0.68	1	0.96875	0.914286	0.970149	0.989474	0.812554	0.795303
1377	0.916667	1	1	0.916667	0.661765	0.65625	0.79661	0.845238	0.706215	0.903226	0.76	1	0.96875	0.85	0.955224	0.989474	0.82476	0.808636
1378	0.895833	1	0.866667	0.958333	0.691176	0.703125	0.864407	0.845238	0.751412	0.709677	0.613333	0.863636	0.96875	0.892857	0.985075	0.989474	0.829119	0.812786
1379	0.916667	1	0.933333	0.958333	0.632353	0.695312	0.898305	0.892857	0.683616	1	0.626667	0.954545	0.96875	0.878571	0.970149	0.989474	0.829991	0.814462
1380	0.927083	0.970588	0.933333	0.958333	0.558824	0.710938	0.830508	0.833333	0.638418	0.870968	0.613333	0.954545	1	0.928571	0.940299	0.989474	0.813426	0.796332
1381	0.9375	1	1	0.916667	0.705882	0.664062	0.847458	0.821429	0.649718	0.83871	0.626667	0.954545	0.90625	0.871429	0.955224	0.989474	0.811683	0.794217
1382	0.947917	0.970588	1	0.916667	0.647059	0.679688	0.881356	0.880952	0.689266	0.806452	0.733333	1	0.9375	0.9	0.970149	0.989474	0.83435	0.819231
1383	0.9375	0.970588	1	0.875	0.705882	0.609375	0.864407	0.892857	0.644068	0.83871	0.68	0.909091	1	0.885714	0.955224	0.989474	0.816042	0.799058
1384	0.90625	1	1	0.958333	0.661765	0.6875	0.711864	0.833333	0.723164	0.774194	0.6	1	0.9375	0.864286	1	0.989474	0.81517	0.797784
1385	0.90625	1	0.933333	0.958333	0.794118	0.671875	0.813559	0.77381	0.677966	0.774194	0.586667	1	0.96875	0.878571	0.955224	0.989474	0.813426	0.796186
1386	0.895833	1	0.866667	0.958333	0.676471	0.648438	0.915254	0.821429	0.638418	0.83871	0.68	1	0.9375	0.9	0.985075	0.989474	0.816042	0.798827
1387	0.927083	1	1	0.958333	0.720588	0.65625	0.847458	0.845238	0.677966	0.83871	0.68	0.863636	0.90625	0.871429	0.985075	0.989474	0.821273	0.804635
1388	0.90625	1	1	0.958333	0.735294	0.671875	0.813559	0.821429	0.711864	0.83871	0.693333	0.909091	1	0.9	0.955224	0.989474	0.829991	0.814315
1389	0.885417	1	1	0.958333	0.720588	0.617188	0.847458	0.904762	0.683616	0.709677	0.613333	1	0.96875	0.914286	0.985075	0.989474	0.820401	0.803404
1390	0.927083	0.970588	0.933333	1	0.691176	0.65625	0.830508	0.77381	0.706215	0.967742	0.68	1	1	0.892857	0.955224	0.989474	0.826504	0.810599
1391	0.90625	1	1	0.916667	0.632353	0.664062	0.830508	0.857143	0.661017	0.774194	0.706667	1	0.96875	0.864286	0.985075	0.989474	0.81517	0.798033
1392	0.927083	1	1	1	0.75	0.617188	0.79661	0.809524	0.666667	0.870968	0.693333	1	1	0.885714	0.970149	0.989474	0.820401	0.803531
1393	0.84375	1	1	0.875	0.779412	0.65625	0.830508	0.785714	0.717514	0.83871	0.64	0.954545	0.96875	0.892857	0.940299	0.989474	0.817786	0.800838
1394	0.895833	0.970588	0.933333	0.958333	0.676471	0.601562	0.864407	0.857143	0.751412	0.806452	0.653333	1	0.96875	0.921429	0.970149	0.989474	0.828248	0.812066
1395	0.885417	1	1	0.958333	0.676471	0.742188	0.813559	0.845238	0.677966	0.870968	0.68	0.954545	1	0.892857	0.985075	0.989474	0.830863	0.815314
1396	0.90625	0.970588	0.866667	0.916667	0.75	0.726562	0.813559	0.797619	0.666667	0.870968	0.626667	0.909091	0.96875	0.878571	0.985075	0.989474	0.819529	0.802743
1397	0.916667	1	1	1	0.632353	0.671875	0.813559	0.880952	0.711864	0.903226	0.68	1	1	0.885714	0.985075	0.989474	0.832607	0.816901
1398	0.895833	0.970588	0.933333	1	0.661765	0.65625	0.864407	0.833333	0.649718	0.83871	0.586667	0.954545	0.96875	0.9	0.970149	0.989474	0.809939	0.792366
1399	0.895833	1	1	0.958333	0.676471	0.671875	0.745763	0.833333	0.677966	0.83871	0.706667	1	1	0.9	0.970149	0.989474	0.821273	0.804434
1400	0.90625	1	0.933333	0.875	0.705882	0.609375	0.830508	0.857143	0.644068	0.870968	0.733333	1	1	0.892857	0.970149	0.989474	0.816914	0.800123
1401	0.927083	1	0.933333	0.958333	0.779412	0.671875	0.79661	0.809524	0.672316	0.806452	0.733333	0.954545	0.9375	0.907143	0.955224	0.989474	0.827376	0.811405
1402	0.90625	1	0.933333	0.916667	0.705882	0.703125	0.830508	0.833333	0.666667	0.83871	0.68	1	0.96875	0.871429	0.970149	0.989474	0.822145	0.805599
1403	0.9375	1	1	0.958333	0.705882	0.640625	0.813559	0.797619	0.717514	0.774194	0.72	0.954545	1	0.914286	0.970149	0.989474	0.829991	0.813901
1404	0.895833	1	0.933333	0.916667	0.676471	0.5625	0.847458	0.833333	0.706215	0.903226	0.68	1	0.96875	0.885714	0.985075	0.989474	0.81517	0.798019
1405	0.895833	0.970588	0.933333	0.958333	0.676471	0.710938	0.79661	0.809524	0.666667	0.774194	0.64	0.954545	1	0.892857	0.970149	0.989474	0.81517	0.798142
1406	0.90625	0.970588	1	0.916667	0.75	0.632812	0.949153	0.892857	0.638418	0.806452	0.586667	0.954545	0.96875	0.885714	0.970149	0.989474	0.816914	0.79995
1407	0.854167	1	0.933333	0.958333	0.720588	0.679688	0.813559	0.880952	0.649718	0.870968	0.733333	1	0.9375	0.9	0.970149	0.989474	0.823888	0.807898
1408	0.927083	1	1	1	0.75	0.679688	0.813559	0.821429	0.723164	0.903226	0.6	1	1	0.885714	0.970149	0.989474	0.832607	0.817278
1409	0.885417	0.970588	1	0.958333	0.705882	0.625	0.932203	0.821429	0.615819	0.83871	0.64	0.954545	0.96875	0.907143	0.970149	0.989474	0.809939	0.792227
1410	0.916667	0.970588	1	0.958333	0.735294	0.578125	0.711864	0.785714	0.661017	0.903226	0.613333	0.909091	1	0.935714	0.985075	0.989474	0.806452	0.788634
1411	0.916667	1	0.933333	0.958333	0.676471	0.6875	0.898305	0.845238	0.661017	0.83871	0.68	0.909091	0.90625	0.885714	0.985075	0.989474	0.823017	0.806329
1412	0.875	1	0.933333	1	0.720588	0.640625	0.898305	0.880952	0.655367	0.870968	0.706667	1	0.96875	0.864286	1	0.989474	0.823888	0.807978
1413	0.864583	1	1	0.916667	0.75	0.625	0.881356	0.821429	0.689266	0.903226	0.626667	1	1	0.9	0.970149	0.989474	0.821273	0.804827
1414	0.9375	1	1	1	0.647059	0.648438	0.898305	0.904762	0.683616	0.806452	0.6	0.954545	1	0.914286	0.970149	0.989474	0.828248	0.812271
1415	0.895833	0.970588	1	0.916667	0.735294	0.695312	0.813559	0.857143	0.728814	0.935484	0.666667	0.954545	1	0.885714	0.985075	0.989474	0.836966	0.821842
1416	0.927083	0.970588	0.933333	0.916667	0.617647	0.648438	0.864407	0.857143	0.728814	0.903226	0.68	0.954545	1	0.9	0.985075	0.989474	0.830863	0.814845
1417	0.90625	0.970588	0.933333	1	0.691176	0.625	0.79661	0.833333	0.711864	0.83871	0.653333	1	0.96875	0.864286	0.970149	0.989474	0.816042	0.798654
1418	0.947917	0.970588	1	0.958333	0.735294	0.65625	0.830508	0.833333	0.751412	0.903226	0.706667	1	1	0.892857	0.970149	0.989474	0.843069	0.828157
1419	0.90625	0.970588	1	0.958333	0.75	0.703125	0.79661	0.880952	0.661017	0.83871	0.666667	0.954545	1	0.885714	0.985075	0.989474	0.828248	0.812493
1420	0.916667	0.941176	0.933333	0.958333	0.647059	0.695312	0.898305	0.857143	0.649718	0.83871	0.693333	1	0.9375	0.871429	0.985075	0.989474	0.821273	0.804937
1421	0.885417	0.970588	0.866667	0.916667	0.808824	0.617188	0.762712	0.845238	0.689266	0.903226	0.786667	0.954545	0.96875	0.871429	0.970149	0.989474	0.823888	0.807784
1422	0.875	1	1	0.916667	0.705882	0.625	0.847458	0.892857	0.711864	0.806452	0.653333	1	1	0.878571	0.985075	0.989474	0.823888	0.807289
1423	0.90625	0.970588	0.933333	0.958333	0.705882	0.671875	0.847458	0.761905	0.706215	0.870968	0.68	1	1	0.9	0.940299	0.989474	0.823888	0.807489
1424	0.916667	0.970588	0.933333	1	0.691176	0.664062	0.728814	0.845238	0.689266	0.935484	0.666667	1	1	0.9	0.955224	0.989474	0.823017	0.806431
1425	0.947917	1	1	1	0.691176	0.671875	0.779661	0.809524	0.728814	0.774194	0.693333	1	0.96875	0.885714	0.985075	0.989474	0.830863	0.814757
1426	0.885417	0.970588	0.933333	1	0.676471	0.664062	0.79661	0.845238	0.723164	0.935484	0.733333	0.909091	0.9375	0.878571	0.985075	0.989474	0.828248	0.812179
1427	0.90625	1	1	0.958333	0.661765	0.695312	0.881356	0.857143	0.677966	0.83871	0.64	0.954545	1	0.871429	0.970149	0.989474	0.823888	0.807464
1428	0.9375	1	0.933333	0.916667	0.647059	0.640625	0.745763	0.821429	0.689266	0.774194	0.706667	1	0.96875	0.871429	0.985075	0.989474	0.813426	0.795828
1429	0.90625	0.970588	1	1	0.735294	0.695312	0.864407	0.821429	0.59887	0.83871	0.64	1	1	0.892857	0.955224	0.989474	0.81517	0.798498
1430	0.885417	0.941176	1	0.958333	0.676471	0.734375	0.79661	0.892857	0.683616	0.806452	0.693333	0.954545	0.9375	0.871429	0.940299	0.989474	0.823888	0.807369
1431	0.864583	1	1	0.916667	0.794118	0.703125	0.881356	0.845238	0.700565	0.870968	0.693333	0.954545	1	0.885714	0.985075	0.989474	0.837838	0.82279
1432	0.916667	1	1	0.958333	0.735294	0.640625	0.881356	0.809524	0.649718	0.83871	0.613333	1	0.96875	0.892857	0.970149	0.989474	0.816042	0.798885
1433	0.927083	0.970588	1	1	0.720588	0.640625	0.847458	0.833333	0.672316	0.806452	0.573333	1	0.9375	0.885714	0.985075	0.989474	0.81517	0.797854
1434	0.916667	1	1	1	0.720588	0.65625	0.830508	0.821429	0.683616	0.806452	0.72	0.954545	1	0.885714	0.985075	0.989474	0.827376	0.811235
1435	0.90625	1	1	0.958333	0.705882	0.65625	0.79661	0.809524	0.632768	0.83871	0.746667	1	0.96875	0.885714	0.970149	0.989474	0.816042	0.799131
1436	0.9375	1	1	0.916667	0.779412	0.640625	0.830508	0.761905	0.694915	0.967742	0.733333	0.954545	0.9375	0.892857	0.970149	0.989474	0.829991	0.813912
1437	0.895833	1	1	0.958333	0.720588	0.65625	0.881356	0.857143	0.700565	0.935484	0.6	1	0.96875	0.878571	0.985075	0.989474	0.827376	0.811246
1438	0.90625	1	0.933333	1	0.720588	0.679688	0.915254	0.809524	0.672316	0.870968	0.653333	0.954545	1	0.892857	0.985075	0.989474	0.828248	0.812461
1439	0.90625	0.970588	1	0.958333	0.691176	0.65625	0.898305	0.845238	0.734463	0.806452	0.706667	1	0.9375	0.892857	0.985075	0.989474	0.835222	0.819748
1440	0.958333	1	1	0.958333	0.661765	0.710938	0.864407	0.833333	0.655367	0.806452	0.733333	0.954545	0.96875	0.885714	0.970149	0.989474	0.829991	0.814582
1441	0.90625	1	1	1	0.661765	0.65625	0.898305	0.880952	0.683616	0.935484	0.613333	0.909091	0.96875	0.9	0.955224	0.989474	0.825632	0.809282
1442	0.916667	0.970588	0.933333	0.958333	0.720588	0.609375	0.762712	0.869048	0.717514	0.83871	0.733333	0.954545	0.96875	0.878571	0.970149	0.989474	0.823888	0.807453
1443	0.9375	0.970588	1	0.958333	0.720588	0.671875	0.864407	0.833333	0.745763	0.806452	0.68	1	0.96875	0.864286	0.970149	0.989474	0.835222	0.819922
1444	0.916667	1	0.933333	1	0.661765	0.726562	0.864407	0.821429	0.661017	0.806452	0.613333	1	0.9375	0.885714	0.970149	0.989474	0.820401	0.803736
1445	0.916667	1	0.933333	0.916667	0.764706	0.679688	0.830508	0.833333	0.621469	0.935484	0.773333	0.954545	0.96875	0.907143	0.970149	0.989474	0.829119	0.813831
1446	0.90625	1	0.933333	0.916667	0.705882	0.53125	0.881356	0.845238	0.677966	0.870968	0.573333	0.909091	0.9375	0.892857	0.985075	0.989474	0.802964	0.784332
1447	0.927083	0.970588	0.933333	0.916667	0.720588	0.710938	0.881356	0.821429	0.689266	0.774194	0.693333	1	0.96875	0.885714	0.985075	0.989474	0.831735	0.816001
1448	0.895833	1	1	0.958333	0.720588	0.734375	0.864407	0.880952	0.706215	0.870968	0.64	0.954545	0.9375	0.9	0.985075	0.989474	0.839582	0.824746
1449	0.885417	0.970588	0.933333	0.958333	0.705882	0.632812	0.864407	0.797619	0.677966	0.83871	0.613333	1	0.96875	0.864286	0.985075	0.989474	0.809067	0.791244
1450	0.96875	1	0.933333	1	0.691176	0.65625	0.830508	0.821429	0.711864	0.774194	0.613333	0.954545	0.90625	0.885714	0.985075	0.989474	0.823017	0.806316
1451	0.916667	1	1	1	0.632353	0.640625	0.830508	0.797619	0.694915	0.870968	0.666667	0.954545	1	0.907143	0.970149	0.989474	0.820401	0.803482
1452	0.864583	1	1	0.958333	0.676471	0.757812	0.728814	0.797619	0.751412	0.741935	0.8	0.954545	1	0.9	0.970149	0.989474	0.83871	0.823414
1453	0.895833	1	0.866667	0.916667	0.632353	0.65625	0.847458	0.880952	0.677966	0.774194	0.666667	0.954545	1	0.864286	0.985075	0.989474	0.814298	0.796929
1454	0.9375	1	0.933333	0.958333	0.823529	0.703125	0.830508	0.797619	0.655367	0.935484	0.786667	0.954545	1	0.878571	0.970149	0.989474	0.83871	0.824221
1455	0.927083	1	1	0.916667	0.529412	0.625	0.813559	0.845238	0.661017	0.806452	0.706667	1	0.96875	0.9	0.970149	0.989474	0.809067	0.791145
1456	0.927083	0.970588	0.933333	0.916667	0.661765	0.570312	0.79661	0.904762	0.672316	0.935484	0.72	1	1	0.892857	0.955224	0.989474	0.817786	0.800772
1457	0.927083	0.970588	1	0.958333	0.764706	0.625	0.898305	0.880952	0.677966	0.870968	0.706667	1	0.96875	0.878571	0.970149	0.989474	0.831735	0.816256
1458	0.927083	0.970588	0.933333	0.958333	0.617647	0.734375	0.830508	0.833333	0.762712	0.870968	0.68	1	1	0.885714	0.985075	0.989474	0.841325	0.826267
1459	0.947917	1	0.933333	1	0.720588	0.609375	0.745763	0.845238	0.638418	0.806452	0.746667	0.954545	1	0.864286	0.955224	0.989474	0.811683	0.794199
1460	0.9375	1	0.933333	0.916667	0.661765	0.585938	0.847458	0.857143	0.672316	0.83871	0.666667	0.909091	0.96875	0.892857	0.970149	0.989474	0.812554	0.795245
1461	0.9375	1	1	0.958333	0.808824	0.703125	0.779661	0.869048	0.677966	0.967742	0.64	0.954545	0.9375	0.907143	0.985075	0.989474	0.83871	0.824085
1462	0.895833	1	1	0.916667	0.632353	0.640625	0.881356	0.845238	0.711864	0.935484	0.693333	1	0.96875	0.907143	0.940299	0.989474	0.827376	0.8111
1463	0.9375	0.970588	1	0.916667	0.676471	0.703125	0.881356	0.821429	0.689266	0.741935	0.626667	0.954545	0.96875	0.935714	0.970149	0.989474	0.829119	0.813109
1464	0.916667	1	1	0.958333	0.691176	0.679688	0.881356	0.869048	0.649718	0.903226	0.613333	0.954545	0.875	0.907143	0.970149	0.989474	0.822145	0.805856
1465	0.916667	1	0.933333	0.916667	0.691176	0.640625	0.813559	0.833333	0.627119	0.83871	0.72	1	0.96875	0.885714	0.970149	0.989474	0.812554	0.795188
1466	0.90625	1	1	0.958333	0.676471	0.710938	0.847458	0.761905	0.723164	0.774194	0.706667	0.954545	1	0.885714	0.985075	0.989474	0.829991	0.81405
1467	0.927083	0.970588	0.933333	0.958333	0.75	0.695312	0.79661	0.821429	0.694915	0.903226	0.626667	0.954545	0.90625	0.914286	0.940299	0.989474	0.826504	0.810397
1468	0.90625	0.970588	0.933333	1	0.75	0.679688	0.813559	0.809524	0.655367	0.903226	0.653333	1	1	0.878571	0.940299	0.989474	0.818657	0.802054
1469	0.895833	1	0.933333	0.875	0.676471	0.65625	0.762712	0.845238	0.757062	0.83871	0.64	0.954545	0.96875	0.9	0.970149	0.989474	0.82476	0.808078
1470	0.90625	1	1	0.916667	0.705882	0.640625	0.830508	0.845238	0.60452	0.83871	0.706667	1	0.96875	0.878571	0.985075	0.989474	0.810811	0.793406
1471	0.895833	0.970588	0.933333	1	0.764706	0.703125	0.847458	0.77381	0.740113	0.870968	0.653333	1	0.90625	0.935714	0.970149	0.989474	0.83871	0.823411
1472	0.9375	0.970588	1	1	0.647059	0.679688	0.881356	0.833333	0.683616	1	0.706667	1	0.9375	0.907143	0.970149	0.989474	0.835222	0.81986
1473	0.927083	0.970588	1	1	0.720588	0.71875	0.813559	0.809524	0.728814	0.935484	0.773333	1	1	0.892857	0.970149	0.989474	0.847428	0.833114
1474	0.864583	0.941176	1	0.916667	0.573529	0.648438	0.881356	0.916667	0.60452	0.709677	0.6	0.954545	1	0.885714	0.955224	0.989474	0.795118	0.776106
1475	0.90625	1	0.933333	0.916667	0.705882	0.609375	0.864407	0.833333	0.649718	0.806452	0.68	1	1	0.878571	0.955224	0.989474	0.810811	0.793591
1476	0.916667	0.970588	1	0.916667	0.735294	0.679688	0.830508	0.761905	0.672316	0.935484	0.72	1	0.96875	0.892857	0.985075	0.989474	0.826504	0.810566
1477	0.895833	0.970588	1	0.958333	0.691176	0.65625	0.79661	0.857143	0.706215	0.645161	0.76	0.909091	1	0.907143	0.985075	0.989474	0.826504	0.81027
1478	0.90625	0.970588	0.933333	0.958333	0.661765	0.578125	0.864407	0.821429	0.627119	0.741935	0.693333	1	1	0.907143	0.955224	0.989474	0.802964	0.784614
1479	0.916667	1	1	1	0.720588	0.671875	0.79661	0.75	0.649718	0.774194	0.693333	0.954545	0.9375	0.892857	0.985075	0.989474	0.813426	0.796086
1480	0.958333	0.970588	1	0.916667	0.647059	0.609375	0.881356	0.869048	0.649718	0.83871	0.586667	1	0.9375	0.9	0.955224	0.989474	0.810811	0.793303
1481	0.927083	0.970588	1	0.958333	0.588235	0.703125	0.881356	0.880952	0.717514	0.870968	0.666667	1	0.9375	0.914286	0.985075	0.989474	0.836966	0.82167
1482	0.854167	1	0.933333	0.958333	0.691176	0.757812	0.847458	0.809524	0.644068	0.83871	0.6	1	0.96875	0.892857	0.955224	0.989474	0.816042	0.79952
1483	0.885417	0.970588	0.933333	0.916667	0.661765	0.632812	0.881356	0.821429	0.655367	0.806452	0.586667	1	0.96875	0.907143	0.970149	0.989474	0.806452	0.788665
1484	0.90625	0.970588	1	0.958333	0.735294	0.664062	0.847458	0.845238	0.638418	0.870968	0.706667	0.954545	1	0.892857	0.955224	0.989474	0.822145	0.805798
1485	0.885417	1	0.933333	0.958333	0.764706	0.703125	0.813559	0.833333	0.666667	0.903226	0.64	1	0.9375	0.892857	0.940299	0.989474	0.823017	0.80689
1486	0.90625	0.970588	0.933333	0.916667	0.602941	0.726562	0.779661	0.845238	0.677966	0.870968	0.613333	1	1	0.885714	0.985075	0.989474	0.817786	0.800831
1487	0.9375	1	1	1	0.632353	0.671875	0.898305	0.797619	0.683616	0.774194	0.666667	0.954545	1	0.9	0.970149	0.989474	0.823888	0.80722
1488	0.90625	1	1	1	0.676471	0.6875	0.881356	0.809524	0.644068	0.806452	0.733333	0.863636	1	0.907143	0.985075	0.989474	0.82476	0.808753
1489	0.9375	1	0.933333	1	0.632353	0.648438	0.864407	0.880952	0.632768	0.806452	0.72	0.954545	1	0.9	0.970149	0.989474	0.821273	0.804754
1490	0.895833	1	1	0.958333	0.75	0.664062	0.762712	0.821429	0.689266	0.903226	0.666667	0.909091	1	0.871429	0.985075	0.989474	0.821273	0.804572
1491	0.90625	0.970588	0.933333	0.958333	0.676471	0.65625	0.881356	0.785714	0.751412	0.806452	0.68	0.954545	0.96875	0.9	0.955224	0.989474	0.828248	0.812419
1492	0.90625	1	0.933333	0.916667	0.75	0.664062	0.847458	0.857143	0.621469	0.967742	0.733333	1	1	0.9	0.940299	0.989474	0.825632	0.809804
1493	0.9375	1	1	1	0.75	0.703125	0.830508	0.833333	0.723164	0.709677	0.666667	1	0.9375	0.885714	1	0.989474	0.836966	0.821807
1494	0.90625	0.970588	0.933333	0.958333	0.735294	0.617188	0.898305	0.880952	0.672316	0.935484	0.68	0.954545	1	0.892857	0.970149	0.989474	0.827376	0.811356
1495	0.947917	0.970588	1	0.916667	0.691176	0.703125	0.830508	0.809524	0.694915	0.870968	0.653333	0.954545	0.9375	0.885714	0.955224	0.989474	0.825632	0.809515
1496	0.875	1	1	1	0.705882	0.648438	0.881356	0.869048	0.581921	0.806452	0.8	0.954545	0.96875	0.9	0.985075	0.989474	0.818657	0.802331
1497	0.833333	1	0.933333	0.958333	0.735294	0.648438	0.847458	0.821429	0.677966	0.83871	0.6	0.954545	1	0.878571	0.985075	0.989474	0.810811	0.79319
1498	0.916667	1	0.933333	0.916667	0.794118	0.695312	0.762712	0.809524	0.655367	0.83871	0.706667	1	0.96875	0.892857	0.985075	0.989474	0.825632	0.809589
1499	0.927083	1	0.933333	0.958333	0.735294	0.671875	0.898305	0.869048	0.661017	0.774194	0.706667	1	0.9375	0.885714	0.955224	1	0.829119	0.813173
1500	0.875	0.970588	1	0.875	0.794118	0.679688	0.915254	0.845238	0.694915	0.870968	0.666667	1	0.9375	0.864286	0.970149	0.989474	0.829119	0.813077
1501	0.854167	1	1	0.958333	0.691176	0.6875	0.881356	0.857143	0.655367	0.870968	0.693333	0.954545	0.96875	0.871429	0.985075	0.989474	0.821273	0.80464
1502	0.875	1	0.933333	0.875	0.75	0.695312	0.881356	0.785714	0.700565	0.870968	0.746667	0.954545	0.90625	0.9	0.955224	0.989474	0.829991	0.814059
1503	0.895833	1	1	0.958333	0.691176	0.648438	0.745763	0.869048	0.734463	0.903226	0.613333	1	1	0.9	0.955224	0.989474	0.825632	0.809639
1504	0.916667	1	1	0.958333	0.720588	0.664062	0.813559	0.785714	0.638418	0.903226	0.666667	1	1	0.9	0.985075	0.989474	0.818657	0.802104
1505	0.916667	0.970588	0.933333	0.916667	0.647059	0.617188	0.813559	0.869048	0.644068	0.870968	0.64	1	0.9375	0.885714	0.985075	0.989474	0.807323	0.789614
1506	0.90625	0.970588	0.933333	1	0.764706	0.601562	0.864407	0.833333	0.700565	0.967742	0.76	0.954545	0.90625	0.9	0.970149	0.989474	0.831735	0.816022
1507	0.864583	1	0.933333	0.875	0.676471	0.703125	0.864407	0.857143	0.632768	0.935484	0.666667	0.909091	0.96875	0.921429	0.955224	0.989474	0.819529	0.803093
1508	0.895833	0.970588	1	1	0.705882	0.664062	0.79661	0.880952	0.694915	0.903226	0.586667	0.909091	1	0.9	0.985075	0.989474	0.823888	0.807455
1509	0.895833	0.970588	0.933333	0.916667	0.823529	0.65625	0.864407	0.809524	0.751412	0.903226	0.706667	1	0.96875	0.864286	0.985075	0.989474	0.83871	0.823614
1510	0.864583	1	1	0.916667	0.735294	0.585938	0.830508	0.833333	0.677966	0.774194	0.666667	1	1	0.871429	0.985075	0.989474	0.809067	0.791232
1511	0.895833	0.970588	1	1	0.794118	0.640625	0.830508	0.821429	0.627119	0.967742	0.653333	0.954545	0.9375	0.892857	0.985075	0.989474	0.817786	0.801347
1512	0.875	0.970588	0.933333	0.958333	0.676471	0.640625	0.864407	0.821429	0.689266	0.903226	0.64	0.954545	1	0.9	0.970149	0.989474	0.817786	0.800721
1513	0.947917	0.970588	0.933333	0.958333	0.676471	0.6875	0.847458	0.785714	0.649718	0.870968	0.746667	1	0.9375	0.878571	1	0.989474	0.823888	0.807531
1514	0.9375	1	0.933333	0.958333	0.661765	0.703125	0.881356	0.833333	0.644068	0.870968	0.626667	1	1	0.871429	0.970149	0.989474	0.820401	0.804266
1515	0.947917	0.970588	1	0.916667	0.720588	0.617188	0.830508	0.845238	0.661017	0.903226	0.693333	1	1	0.878571	0.970149	0.989474	0.821273	0.804677
1516	0.90625	0.970588	1	0.958333	0.779412	0.664062	0.847458	0.761905	0.644068	0.903226	0.626667	0.954545	0.96875	0.892857	0.940299	0.989474	0.813426	0.796546
1517	0.885417	1	1	1	0.705882	0.671875	0.915254	0.857143	0.757062	0.870968	0.68	0.954545	1	0.928571	0.985075	1	0.849172	0.834885
1518	0.885417	1	0.933333	0.916667	0.676471	0.648438	0.830508	0.880952	0.683616	0.903226	0.626667	0.909091	0.96875	0.878571	0.970149	0.989474	0.816042	0.798735
1519	0.927083	0.970588	1	1	0.705882	0.664062	0.847458	0.833333	0.694915	0.935484	0.733333	1	1	0.864286	0.985075	0.989474	0.833479	0.818099
1520	0.927083	1	0.933333	0.916667	0.779412	0.617188	0.762712	0.833333	0.655367	0.83871	0.733333	1	0.96875	0.907143	0.925373	0.989474	0.818657	0.801954
1521	0.90625	0.970588	1	0.958333	0.691176	0.671875	0.830508	0.785714	0.644068	0.935484	0.573333	0.954545	0.96875	0.878571	0.970149	0.989474	0.807323	0.789756
1522	0.875	1	0.933333	0.958333	0.705882	0.726562	0.813559	0.892857	0.627119	0.935484	0.706667	0.954545	1	0.885714	0.970149	0.989474	0.826504	0.810994
1523	0.895833	0.970588	1	0.958333	0.75	0.617188	0.898305	0.821429	0.661017	0.870968	0.666667	0.954545	1	0.907143	1	0.989474	0.823017	0.806657
1524	0.947917	1	1	0.958333	0.735294	0.648438	0.898305	0.845238	0.666667	0.83871	0.72	0.954545	0.9375	0.878571	0.955224	0.989474	0.828248	0.812625
1525	0.9375	1	0.933333	0.958333	0.544118	0.6875	0.847458	0.821429	0.661017	0.806452	0.626667	0.954545	0.96875	0.907143	0.985075	0.989474	0.813426	0.796119
1526	0.916667	1	1	0.958333	0.691176	0.679688	0.762712	0.821429	0.683616	0.870968	0.773333	0.954545	0.9375	0.892857	0.970149	0.989474	0.827376	0.811147
1527	0.916667	0.970588	1	1	0.764706	0.640625	0.881356	0.869048	0.627119	0.806452	0.573333	0.909091	1	0.892857	0.985075	0.989474	0.81517	0.798051
1528	0.895833	1	1	0.916667	0.720588	0.632812	0.79661	0.797619	0.621469	0.903226	0.626667	0.954545	0.90625	0.9	0.985075	0.989474	0.803836	0.785678
1529	0.90625	1	1	1	0.617647	0.671875	0.915254	0.797619	0.677966	0.83871	0.653333	0.909091	1	0.885714	1	0.989474	0.820401	0.80374
1530	0.895833	0.970588	0.933333	0.916667	0.691176	0.625	0.847458	0.880952	0.632768	0.967742	0.72	1	1	0.878571	0.970149	0.989474	0.817786	0.801341
1531	0.927083	1	1	0.958333	0.735294	0.695312	0.847458	0.857143	0.723164	0.967742	0.666667	0.954545	0.9375	0.9	0.970149	0.989474	0.842197	0.827585
1532	0.916667	1	1	0.916667	0.617647	0.710938	0.881356	0.833333	0.666667	0.774194	0.653333	0.954545	0.96875	0.892857	0.970149	0.989474	0.820401	0.803668
1533	0.927083	1	0.933333	1	0.691176	0.679688	0.847458	0.797619	0.734463	0.83871	0.64	1	0.96875	0.871429	0.955224	0.989474	0.827376	0.811117
1534	0.947917	1	1	0.916667	0.720588	0.6875	0.830508	0.833333	0.615819	0.677419	0.693333	0.954545	1	0.878571	0.940299	0.989474	0.813426	0.796785
1535	0.885417	1	1	0.958333	0.75	0.617188	0.79661	0.845238	0.717514	0.83871	0.72	0.954545	0.9375	0.892857	0.970149	0.989474	0.825632	0.809389
1536	0.90625	0.970588	0.933333	0.958333	0.676471	0.679688	0.813559	0.845238	0.655367	0.806452	0.613333	0.954545	1	0.892857	0.940299	0.989474	0.811683	0.794081
1537	0.927083	0.970588	0.933333	0.916667	0.735294	0.664062	0.847458	0.797619	0.694915	0.83871	0.706667	1	0.9375	0.864286	0.970149	0.989474	0.823017	0.80671
1538	0.875	0.970588	1	1	0.705882	0.617188	0.864407	0.809524	0.683616	0.83871	0.706667	1	1	0.921429	0.985075	0.989474	0.823888	0.807321
1539	0.875	1	1	0.958333	0.75	0.679688	0.898305	0.869048	0.621469	0.677419	0.72	1	0.96875	0.907143	0.985075	0.989474	0.823888	0.807635
1540	0.90625	1	1	0.958333	0.705882	0.726562	0.898305	0.845238	0.610169	0.870968	0.613333	0.909091	0.90625	0.914286	0.970149	0.989474	0.820401	0.804547
1541	0.927083	1	1	0.958333	0.676471	0.625	0.79661	0.892857	0.644068	0.741935	0.706667	1	0.9375	0.907143	0.985075	0.989474	0.817786	0.800974
1542	0.864583	1	0.933333	0.958333	0.647059	0.671875	0.915254	0.845238	0.683616	0.870968	0.72	1	0.9375	0.921429	0.985075	0.989474	0.829991	0.814203
1543	0.9375	1	1	0.958333	0.764706	0.679688	0.830508	0.785714	0.644068	0.83871	0.706667	1	0.9375	0.907143	0.970149	0.989474	0.825632	0.809483
1544	0.895833	1	1	0.958333	0.661765	0.695312	0.864407	0.880952	0.661017	0.903226	0.573333	0.954545	0.9375	0.9	0.925373	0.989474	0.817786	0.801094
1545	0.854167	0.970588	0.933333	0.916667	0.779412	0.664062	0.847458	0.880952	0.666667	0.870968	0.666667	0.954545	1	0.9	0.970149	0.989474	0.82476	0.808543
1546	0.916667	1	0.933333	0.958333	0.720588	0.640625	0.762712	0.809524	0.711864	0.806452	0.653333	0.954545	1	0.892857	0.955224	0.989474	0.818657	0.801591
1547	0.875	1	1	1	0.735294	0.648438	0.813559	0.857143	0.683616	0.935484	0.706667	1	1	0.892857	0.955224	0.989474	0.828248	0.812266
1548	0.895833	1	1	0.916667	0.705882	0.671875	0.898305	0.761905	0.59322	0.903226	0.706667	0.863636	0.96875	0.878571	0.985075	0.989474	0.808195	0.790591
1549	0.90625	0.970588	0.933333	1	0.720588	0.664062	0.847458	0.869048	0.677966	0.903226	0.733333	1	1	0.907143	0.970149	0.989474	0.835222	0.819898
1550	0.90625	1	0.933333	0.916667	0.705882	0.59375	0.813559	0.880952	0.717514	0.870968	0.653333	0.954545	0.96875	0.914286	0.985075	0.989474	0.82476	0.808073
1551	0.916667	1	1	0.916667	0.632353	0.632812	0.762712	0.797619	0.734463	0.935484	0.68	0.954545	0.96875	0.878571	0.970149	0.989474	0.818657	0.801812
1552	0.90625	1	1	0.958333	0.735294	0.6875	0.881356	0.785714	0.683616	0.83871	0.68	0.954545	0.96875	0.907143	0.970149	0.989474	0.829119	0.813095
1553	0.895833	0.970588	0.933333	1	0.661765	0.671875	0.881356	0.785714	0.689266	0.741935	0.64	0.954545	1	0.885714	1	0.989474	0.816914	0.799894
1554	0.895833	0.970588	1	1	0.764706	0.695312	0.79661	0.833333	0.717514	0.774194	0.693333	0.954545	1	0.864286	0.970149	0.989474	0.829991	0.814077
1555	0.927083	0.970588	1	0.958333	0.617647	0.65625	0.79661	0.833333	0.745763	0.967742	0.586667	1	1	0.885714	0.970149	0.989474	0.82476	0.808163
1556	0.875	1	0.933333	1	0.617647	0.65625	0.881356	0.785714	0.683616	0.774194	0.68	1	1	0.871429	0.985075	0.989474	0.812554	0.794619
1557	0.927083	0.970588	0.933333	0.958333	0.720588	0.742188	0.79661	0.857143	0.655367	0.903226	0.72	1	0.96875	0.878571	0.970149	0.989474	0.832607	0.817088
1558	0.90625	0.970588	0.933333	1	0.75	0.65625	0.881356	0.904762	0.711864	0.806452	0.56	1	0.96875	0.892857	1	0.989474	0.830863	0.815191
1559	0.864583	0.970588	1	1	0.676471	0.546875	0.79661	0.797619	0.728814	0.83871	0.733333	1	0.96875	0.878571	0.985075	0.989474	0.811683	0.794152
1560	0.916667	1	1	0.916667	0.602941	0.695312	0.881356	0.809524	0.666667	0.709677	0.613333	1	1	0.907143	0.940299	0.989474	0.813426	0.796246
1561	0.927083	1	1	1	0.676471	0.625	0.864407	0.821429	0.683616	0.870968	0.706667	0.909091	0.96875	0.864286	0.955224	0.989474	0.818657	0.801519
1562	0.927083	1	0.866667	0.916667	0.720588	0.65625	0.881356	0.797619	0.706215	0.967742	0.706667	0.909091	0.9375	0.907143	0.955224	0.989474	0.830863	0.815021
1563	0.90625	0.970588	0.933333	0.958333	0.764706	0.671875	0.813559	0.845238	0.632768	0.903226	0.706667	1	1	0.907143	0.985075	0.989474	0.826504	0.810684
1564	0.927083	0.970588	0.933333	0.916667	0.705882	0.671875	0.847458	0.821429	0.672316	0.935484	0.666667	1	1	0.871429	0.985075	0.989474	0.823888	0.807431
1565	0.947917	0.970588	1	0.958333	0.720588	0.703125	0.881356	0.869048	0.683616	0.806452	0.72	0.954545	0.90625	0.892857	0.985075	0.989474	0.837838	0.822894
1566	0.958333	1	1	0.958333	0.75	0.625	0.932203	0.880952	0.632768	0.806452	0.6	0.954545	1	0.914286	0.970149	0.989474	0.82476	0.808479
1567	0.927083	1	0.933333	1	0.602941	0.671875	0.898305	0.857143	0.683616	0.83871	0.693333	1	0.96875	0.892857	0.985075	0.989474	0.828248	0.812275
1568	0.916667	0.970588	0.866667	0.875	0.720588	0.65625	0.813559	0.761905	0.661017	0.935484	0.76	0.954545	0.96875	0.885714	0.985075	0.989474	0.818657	0.801791
1569	0.885417	0.970588	1	0.958333	0.838235	0.695312	0.864407	0.857143	0.751412	0.741935	0.613333	0.954545	1	0.914286	0.970149	0.989474	0.843069	0.828339
1570	0.885417	0.970588	0.933333	1	0.661765	0.679688	0.915254	0.869048	0.694915	0.806452	0.72	0.863636	0.90625	0.928571	0.970149	0.989474	0.831735	0.815904
1571	0.895833	0.970588	1	0.958333	0.661765	0.632812	0.881356	0.833333	0.649718	0.967742	0.64	1	0.96875	0.914286	0.985075	0.989474	0.818657	0.801852
1572	0.885417	0.970588	1	0.958333	0.735294	0.703125	0.745763	0.880952	0.706215	0.83871	0.746667	1	1	0.914286	0.970149	0.989474	0.83871	0.823741
1573	0.895833	1	0.933333	0.958333	0.75	0.65625	0.932203	0.857143	0.644068	0.83871	0.6	0.954545	0.875	0.892857	0.985075	0.989474	0.817786	0.80079
1574	0.885417	1	0.933333	0.958333	0.735294	0.6875	0.966102	0.845238	0.728814	0.83871	0.666667	0.954545	1	0.9	0.985075	0.989474	0.842197	0.827562
1575	0.875	1	1	0.916667	0.691176	0.695312	0.932203	0.857143	0.666667	0.83871	0.68	1	0.96875	0.921429	0.985075	0.989474	0.832607	0.817121
1576	0.90625	1	0.933333	0.958333	0.75	0.671875	0.864407	0.869048	0.661017	0.83871	0.68	1	1	0.885714	0.970149	0.989474	0.828248	0.812502
1577	0.916667	1	0.933333	0.958333	0.573529	0.640625	0.864407	0.845238	0.627119	0.935484	0.68	0.954545	0.96875	0.885714	0.985075	1	0.810811	0.793506
1578	0.885417	1	0.933333	1	0.75	0.585938	0.898305	0.785714	0.655367	0.774194	0.626667	0.954545	1	0.907143	0.985075	0.989474	0.809939	0.792227
1579	0.9375	0.941176	1	1	0.705882	0.710938	0.813559	0.869048	0.638418	0.935484	0.693333	0.909091	0.9375	0.878571	0.970149	0.989474	0.825632	0.809657
1580	0.90625	1	0.933333	0.916667	0.647059	0.679688	0.813559	0.857143	0.689266	0.903226	0.786667	1	0.90625	0.885714	0.985075	0.989474	0.829991	0.81423
1581	0.885417	1	1	0.916667	0.705882	0.710938	0.779661	0.940476	0.661017	0.870968	0.666667	1	0.9375	0.871429	0.970149	0.989474	0.825632	0.810007
1582	0.916667	0.970588	0.933333	0.958333	0.794118	0.640625	0.847458	0.75	0.672316	0.870968	0.72	1	0.90625	0.892857	0.985075	0.989474	0.822145	0.805771
1583	0.927083	1	1	1	0.794118	0.679688	0.847458	0.821429	0.655367	0.967742	0.613333	0.863636	1	0.864286	1	0.989474	0.825632	0.809644
1584	0.895833	0.970588	1	0.958333	0.691176	0.648438	0.932203	0.869048	0.666667	0.967742	0.733333	1	0.90625	0.914286	0.970149	0.989474	0.833479	0.817998
1585	0.90625	1	0.933333	0.875	0.735294	0.71875	0.864407	0.833333	0.644068	0.935484	0.613333	0.954545	0.90625	0.885714	0.985075	0.989474	0.821273	0.804829
1586	0.895833	1	0.933333	0.958333	0.735294	0.664062	0.813559	0.797619	0.627119	0.83871	0.733333	0.909091	0.96875	0.885714	0.985075	0.989474	0.814298	0.797281
1587	0.90625	1	0.866667	0.958333	0.823529	0.664062	0.813559	0.77381	0.683616	0.903226	0.72	1	0.96875	0.878571	0.985075	0.989474	0.828248	0.812288
1588	0.927083	0.941176	1	0.958333	0.764706	0.632812	0.847458	0.845238	0.661017	0.741935	0.693333	0.954545	0.96875	0.864286	0.985075	0.989474	0.817786	0.800944
1589	0.916667	0.970588	1	0.916667	0.661765	0.726562	0.881356	0.785714	0.683616	0.806452	0.666667	1	0.90625	0.907143	0.985075	0.989474	0.826504	0.810276
1590	0.916667	0.970588	1	0.958333	0.764706	0.679688	0.847458	0.821429	0.621469	0.870968	0.573333	0.954545	0.96875	0.878571	0.925373	0.989474	0.809067	0.791779
1591	0.916667	1	0.933333	0.958333	0.602941	0.648438	0.813559	0.821429	0.666667	1	0.693333	0.909091	1	0.914286	0.970149	0.989474	0.819529	0.802928
1592	0.90625	1	0.866667	0.875	0.588235	0.75	0.864407	0.785714	0.666667	0.903226	0.693333	1	0.96875	0.885714	0.955224	0.989474	0.820401	0.8035
1593	0.90625	0.970588	1	0.875	0.632353	0.632812	0.864407	0.880952	0.632768	0.870968	0.666667	0.954545	1	0.907143	0.970149	1	0.814298	0.797261
1594	0.90625	1	1	0.958333	0.617647	0.679688	0.881356	0.785714	0.649718	0.935484	0.72	0.909091	0.9375	0.9	0.985075	0.989474	0.819529	0.802735
1595	0.90625	0.970588	1	0.958333	0.838235	0.671875	0.864407	0.869048	0.706215	0.903226	0.52	0.954545	0.96875	0.878571	0.985075	0.989474	0.829991	0.81433
1596	0.885417	1	1	0.916667	0.647059	0.648438	0.864407	0.880952	0.610169	0.870968	0.68	0.954545	1	0.9	0.985075	0.989474	0.813426	0.796359
1597	0.927083	0.970588	0.933333	0.958333	0.617647	0.710938	0.830508	0.833333	0.655367	0.83871	0.626667	0.909091	1	0.907143	1	0.989474	0.819529	0.803037
1598	0.927083	0.970588	0.866667	0.958333	0.691176	0.664062	0.813559	0.761905	0.700565	0.774194	0.706667	1	0.90625	0.921429	0.985075	0.989474	0.822145	0.805179
1599	0.864583	1	0.933333	0.958333	0.705882	0.648438	0.847458	0.75	0.694915	0.967742	0.733333	1	0.96875	0.885714	0.970149	0.989474	0.821273	0.804723
1600	0.895833	0.970588	0.933333	0.916667	0.75	0.609375	0.830508	0.77381	0.689266	0.774194	0.786667	0.954545	0.96875	0.892857	0.955224	0.989474	0.817786	0.800692
1601	0.875	1	1	0.875	0.691176	0.640625	0.813559	0.857143	0.711864	0.935484	0.773333	0.954545	0.96875	0.892857	0.970149	0.989474	0.829991	0.814052
1602	0.885417	0.970588	0.933333	0.916667	0.720588	0.65625	0.745763	0.797619	0.627119	0.83871	0.68	0.954545	0.96875	0.878571	0.955224	0.989474	0.801221	0.782786
1603	0.90625	1	0.933333	0.958333	0.691176	0.742188	0.898305	0.845238	0.734463	0.83871	0.52	0.954545	0.96875	0.85	0.970149	0.989474	0.827376	0.81114
1604	0.9375	1	0.933333	0.958333	0.676471	0.671875	0.847458	0.869048	0.694915	0.903226	0.666667	0.909091	1	0.878571	0.985075	0.989474	0.829991	0.81409
1605	0.916667	1	1	0.958333	0.676471	0.671875	0.711864	0.857143	0.649718	0.870968	0.746667	0.954545	0.96875	0.871429	0.955224	0.989474	0.816042	0.799378
1606	0.895833	0.970588	1	0.958333	0.676471	0.671875	0.847458	0.845238	0.644068	0.806452	0.693333	1	1	0.885714	0.985075	0.989474	0.818657	0.802044
1607	0.927083	1	1	0.833333	0.661765	0.789062	0.898305	0.797619	0.621469	0.935484	0.68	0.954545	0.96875	0.9	0.970149	0.989474	0.829119	0.814038
1608	0.895833	0.970588	1	1	0.691176	0.75	0.813559	0.892857	0.711864	0.903226	0.733333	1	0.96875	0.878571	0.970149	0.989474	0.843941	0.829584
1609	0.9375	1	0.933333	0.916667	0.691176	0.703125	0.813559	0.797619	0.666667	0.83871	0.666667	1	1	0.914286	0.985075	0.989474	0.826504	0.810276
1610	0.916667	0.970588	1	0.958333	0.632353	0.679688	0.898305	0.833333	0.672316	0.967742	0.72	1	0.96875	0.892857	0.955224	0.989474	0.829119	0.813358
1611	0.895833	0.970588	0.933333	0.833333	0.705882	0.679688	0.830508	0.940476	0.661017	0.903226	0.693333	0.954545	0.9375	0.885714	0.955224	0.989474	0.82476	0.808705
1612	0.864583	0.970588	1	1	0.691176	0.6875	0.813559	0.857143	0.644068	0.870968	0.68	0.909091	1	0.892857	1	0.989474	0.819529	0.803052
1613	0.875	1	0.933333	0.958333	0.691176	0.671875	0.881356	0.833333	0.59887	0.741935	0.653333	0.954545	0.96875	0.907143	0.970149	0.989474	0.807323	0.789514
1614	0.895833	0.970588	1	0.958333	0.617647	0.671875	0.881356	0.809524	0.728814	0.903226	0.653333	0.954545	1	0.907143	0.985075	0.989474	0.829119	0.812939
1615	0.916667	1	1	0.958333	0.720588	0.695312	0.898305	0.821429	0.621469	0.806452	0.653333	1	0.96875	0.885714	0.955224	1	0.819529	0.802975
1616	0.9375	1	0.933333	0.916667	0.647059	0.65625	0.898305	0.761905	0.677966	0.935484	0.64	0.909091	0.96875	0.892857	0.970149	0.989474	0.816914	0.799755
1617	0.9375	0.970588	0.933333	0.916667	0.705882	0.65625	0.830508	0.797619	0.649718	0.935484	0.68	1	0.96875	0.914286	0.955224	0.989474	0.820401	0.803589
1618	0.875	1	1	1	0.632353	0.6875	0.779661	0.833333	0.672316	0.83871	0.64	0.954545	0.9375	0.914286	0.985075	0.989474	0.816042	0.798852
1619	0.958333	0.970588	1	0.958333	0.720588	0.640625	0.881356	0.821429	0.689266	0.806452	0.72	0.954545	0.9375	0.885714	0.970149	0.989474	0.828248	0.812053
1620	0.90625	0.970588	1	0.958333	0.735294	0.609375	0.881356	0.928571	0.677966	0.774194	0.72	0.954545	0.9375	0.9	0.985075	0.989474	0.829119	0.813301
1621	0.885417	0.970588	0.933333	0.916667	0.661765	0.664062	0.79661	0.833333	0.717514	0.967742	0.666667	0.954545	0.96875	0.9	0.955224	0.989474	0.823017	0.80641
1622	0.927083	1	1	0.958333	0.720588	0.617188	0.79661	0.869048	0.717514	0.806452	0.666667	1	1	0.9	0.955224	0.989474	0.827376	0.811059
1623	0.885417	0.941176	1	0.916667	0.764706	0.65625	0.932203	0.821429	0.734463	0.903226	0.693333	1	1	0.914286	0.970149	0.989474	0.841325	0.826605
1624	0.875	1	1	0.916667	0.735294	0.601562	0.847458	0.797619	0.632768	0.83871	0.613333	0.909091	0.9375	0.871429	0.970149	0.989474	0.796861	0.77795
1625	0.895833	1	0.933333	0.958333	0.794118	0.65625	0.779661	0.869048	0.700565	0.83871	0.653333	1	0.9375	0.907143	0.985075	0.989474	0.829991	0.814144
1626	0.9375	1	1	0.916667	0.705882	0.640625	0.864407	0.845238	0.672316	0.870968	0.666667	0.954545	0.9375	0.892857	0.970149	0.989474	0.823017	0.806745
1627	0.90625	1	0.933333	0.958333	0.75	0.609375	0.864407	0.833333	0.706215	0.83871	0.666667	0.909091	0.9375	0.914286	0.970149	0.989474	0.82476	0.808427
1628	0.90625	1	1	1	0.735294	0.710938	0.881356	0.845238	0.661017	0.935484	0.666667	1	1	0.9	0.985075	0.989474	0.836966	0.821798
1629	0.958333	0.970588	0.933333	1	0.735294	0.695312	0.881356	0.880952	0.683616	0.83871	0.64	0.909091	0.9375	0.907143	0.970149	0.989474	0.836094	0.820769
1630	0.927083	1	0.933333	0.833333	0.632353	0.695312	0.881356	0.75	0.717514	0.903226	0.72	0.954545	1	0.878571	0.970149	0.989474	0.826504	0.810306
1631	0.90625	0.970588	0.933333	0.875	0.647059	0.664062	0.847458	0.845238	0.677966	0.903226	0.626667	0.909091	0.9375	0.864286	0.955224	0.989474	0.809939	0.792241
1632	0.854167	1	0.933333	1	0.720588	0.65625	0.847458	0.821429	0.655367	0.903226	0.64	0.954545	0.96875	0.878571	0.940299	0.989474	0.810811	0.793086
1633	0.864583	1	1	1	0.735294	0.648438	0.915254	0.833333	0.649718	0.967742	0.666667	0.909091	0.96875	0.864286	0.970149	0.989474	0.818657	0.802171
1634	0.90625	0.970588	1	0.958333	0.632353	0.679688	0.881356	0.869048	0.666667	0.903226	0.653333	1	1	0.907143	0.955224	0.989474	0.825632	0.809662
1635	0.895833	1	0.933333	0.916667	0.794118	0.609375	0.79661	0.845238	0.677966	0.903226	0.666667	0.909091	0.96875	0.9	0.985075	0.989474	0.820401	0.803567
1636	0.90625	0.970588	0.933333	1	0.808824	0.6875	0.847458	0.761905	0.655367	0.870968	0.64	1	0.9375	0.9	0.985075	0.989474	0.823017	0.806747
1637	0.875	0.970588	1	1	0.764706	0.65625	0.830508	0.857143	0.711864	0.935484	0.653333	0.954545	0.9375	0.9	0.985075	0.989474	0.831735	0.816293
1638	0.927083	0.970588	1	0.916667	0.735294	0.679688	0.898305	0.892857	0.683616	0.903226	0.6	1	0.9375	0.914286	0.955224	0.989474	0.833479	0.81798
1639	0.875	0.970588	0.933333	0.916667	0.602941	0.679688	0.864407	0.833333	0.706215	0.903226	0.653333	0.954545	0.9375	0.864286	0.955224	0.989474	0.814298	0.796786
1640	0.895833	0.970588	1	0.916667	0.661765	0.632812	0.847458	0.940476	0.638418	0.903226	0.666667	1	0.96875	0.892857	0.985075	0.989474	0.819529	0.802734
1641	0.895833	1	1	1	0.764706	0.648438	0.813559	0.833333	0.638418	0.935484	0.653333	1	1	0.9	0.985075	0.989474	0.822145	0.805907
1642	0.885417	1	0.933333	0.958333	0.647059	0.695312	0.881356	0.892857	0.672316	0.903226	0.64	0.954545	0.9375	0.878571	0.940299	0.989474	0.821273	0.804594
1643	0.9375	1	0.933333	0.958333	0.617647	0.640625	0.847458	0.785714	0.694915	0.83871	0.693333	1	0.96875	0.914286	1	0.989474	0.823017	0.806463
1644	0.875	1	1	0.958333	0.705882	0.640625	0.864407	0.821429	0.644068	0.967742	0.76	0.954545	1	0.907143	0.955224	0.989474	0.823888	0.807646
1645	0.84375	1	0.933333	0.916667	0.720588	0.6875	0.830508	0.869048	0.644068	0.870968	0.64	1	0.96875	0.914286	0.985075	0.989474	0.819529	0.802931
1646	0.916667	1	0.933333	0.916667	0.647059	0.695312	0.864407	0.797619	0.649718	0.935484	0.733333	0.954545	0.96875	0.878571	0.910448	0.989474	0.817786	0.801151
1647	0.916667	1	1	0.916667	0.676471	0.632812	0.813559	0.869048	0.672316	0.806452	0.72	1	0.96875	0.885714	0.970149	0.989474	0.820401	0.80382
1648	0.9375	0.970588	1	0.958333	0.602941	0.640625	0.79661	0.821429	0.655367	0.903226	0.68	1	0.90625	0.871429	0.985075	0.989474	0.809067	0.791227
1649	0.927083	0.970588	0.933333	0.958333	0.617647	0.664062	0.864407	0.845238	0.700565	0.83871	0.586667	0.909091	0.96875	0.928571	1	0.989474	0.823017	0.806534
1650	0.90625	1	0.933333	0.958333	0.75	0.695312	0.79661	0.821429	0.672316	0.774194	0.586667	1	1	0.892857	0.970149	0.989474	0.818657	0.801791
1651	0.927083	1	1	0.958333	0.735294	0.6875	0.813559	0.833333	0.644068	0.967742	0.773333	1	0.9375	0.885714	0.970149	0.989474	0.831735	0.816282
1652	0.895833	0.970588	1	0.958333	0.735294	0.695312	0.813559	0.797619	0.666667	0.741935	0.613333	0.954545	0.9375	0.914286	0.955224	1	0.816042	0.799034
1653	0.90625	0.970588	0.933333	0.916667	0.647059	0.664062	0.864407	0.845238	0.683616	0.935484	0.786667	0.954545	0.96875	0.907143	0.985075	0.989474	0.832607	0.816863
1654	0.854167	1	1	0.916667	0.661765	0.6875	0.813559	0.785714	0.706215	0.903226	0.733333	0.954545	0.96875	0.9	0.970149	0.989474	0.823888	0.807515
1655	0.927083	0.970588	0.866667	1	0.720588	0.695312	0.915254	0.797619	0.728814	0.903226	0.613333	0.954545	0.9375	0.878571	0.985075	0.989474	0.832607	0.817212
1656	0.885417	1	0.933333	1	0.647059	0.6875	0.79661	0.797619	0.638418	0.967742	0.68	1	0.96875	0.9	0.970149	0.989474	0.81517	0.798241
1657	0.90625	0.970588	1	1	0.735294	0.671875	0.864407	0.880952	0.677966	0.83871	0.6	1	0.9375	0.892857	0.985075	0.989474	0.826504	0.810376
1658	0.84375	1	1	0.958333	0.676471	0.695312	0.779661	0.857143	0.694915	0.83871	0.666667	1	0.96875	0.842857	0.985075	0.989474	0.816042	0.798886
1659	0.916667	0.970588	1	0.958333	0.661765	0.679688	0.881356	0.77381	0.672316	0.806452	0.586667	1	1	0.892857	0.970149	0.989474	0.814298	0.796783
1660	0.895833	0.970588	0.933333	1	0.764706	0.703125	0.830508	0.869048	0.627119	0.903226	0.72	1	0.90625	0.907143	0.985075	0.989474	0.829991	0.814532
1661	0.947917	1	0.933333	1	0.617647	0.625	0.864407	0.797619	0.677966	0.903226	0.72	1	0.96875	0.914286	0.970149	0.989474	0.823888	0.807676
1662	0.958333	1	0.933333	0.958333	0.647059	0.695312	0.779661	0.833333	0.638418	0.806452	0.666667	0.909091	0.96875	0.878571	0.970149	0.989474	0.813426	0.796358
1663	0.927083	1	1	1	0.705882	0.679688	0.847458	0.904762	0.666667	0.83871	0.68	0.863636	0.96875	0.907143	1	0.989474	0.833479	0.817876
1664	0.927083	0.970588	0.933333	0.958333	0.705882	0.65625	0.881356	0.845238	0.666667	0.806452	0.6	1	0.9375	0.921429	0.985075	0.989474	0.822145	0.805506
1665	0.90625	1	0.933333	1	0.676471	0.632812	0.847458	0.869048	0.644068	0.741935	0.68	0.954545	1	0.907143	0.970149	0.989474	0.816042	0.798739
1666	0.927083	0.970588	1	0.958333	0.720588	0.703125	0.813559	0.821429	0.683616	0.935484	0.733333	0.954545	0.96875	0.9	0.970149	0.989474	0.835222	0.819722
1667	0.9375	1	1	0.958333	0.676471	0.664062	0.779661	0.845238	0.621469	0.870968	0.666667	0.954545	0.90625	0.885714	0.985075	0.989474	0.811683	0.794128
1668	0.895833	1	1	1	0.691176	0.625	0.864407	0.785714	0.621469	0.806452	0.52	0.909091	1	0.921429	0.970149	0.989474	0.799477	0.781043
1669	0.885417	0.970588	1	0.958333	0.632353	0.632812	0.847458	0.75	0.677966	0.83871	0.72	0.954545	0.9375	0.892857	0.970149	0.989474	0.809067	0.791561
1670	0.916667	1	0.933333	1	0.735294	0.640625	0.881356	0.821429	0.683616	0.83871	0.6	0.954545	0.9375	0.914286	0.985075	0.989474	0.823017	0.806507
1671	0.9375	0.941176	1	1	0.720588	0.609375	0.813559	0.880952	0.706215	0.83871	0.72	0.909091	1	0.914286	0.970149	0.989474	0.831735	0.816178
1672	0.90625	1	1	0.958333	0.720588	0.632812	0.79661	0.880952	0.661017	0.870968	0.706667	1	1	0.864286	0.970149	0.989474	0.820401	0.803542
1673	0.927083	0.970588	0.933333	1	0.735294	0.664062	0.830508	0.761905	0.689266	0.806452	0.64	1	1	0.907143	0.970149	0.989474	0.822145	0.805582
1674	0.916667	1	0.933333	0.916667	0.735294	0.664062	0.864407	0.869048	0.638418	0.903226	0.733333	0.909091	0.90625	0.885714	0.985075	0.989474	0.82476	0.808381
1675	0.96875	1	1	0.958333	0.779412	0.671875	0.881356	0.809524	0.60452	0.870968	0.666667	0.954545	0.9375	0.885714	0.940299	0.989474	0.819529	0.803164
1676	0.90625	1	0.933333	0.958333	0.661765	0.679688	0.847458	0.833333	0.666667	0.83871	0.693333	1	1	0.9	0.970149	0.989474	0.823888	0.807298
1677	0.90625	1	0.933333	1	0.705882	0.664062	0.813559	0.797619	0.711864	0.967742	0.706667	1	1	0.9	1	0.989474	0.83435	0.818605
1678	0.916667	0.970588	0.933333	0.958333	0.647059	0.757812	0.881356	0.821429	0.655367	0.935484	0.68	1	0.96875	0.914286	0.955224	0.989474	0.832607	0.817407
1679	0.9375	1	1	1	0.676471	0.6875	0.813559	0.857143	0.621469	0.870968	0.693333	0.954545	0.9375	0.914286	0.940299	0.989474	0.821273	0.804819
1680	0.916667	1	0.933333	0.958333	0.676471	0.632812	0.813559	0.869048	0.649718	0.935484	0.68	0.954545	0.9375	0.892857	0.985075	0.989474	0.817786	0.801347
1681	0.895833	1	0.933333	0.958333	0.705882	0.710938	0.847458	0.869048	0.694915	0.774194	0.6	1	0.96875	0.892857	0.970149	0.989474	0.826504	0.810427
1682	0.916667	1	1	1	0.735294	0.601562	0.830508	0.809524	0.610169	0.806452	0.64	1	1	0.864286	0.940299	0.989474	0.800349	0.781807
1683	0.90625	1	0.933333	0.958333	0.691176	0.742188	0.898305	0.833333	0.655367	0.83871	0.706667	1	1	0.892857	0.985075	0.989474	0.83435	0.81901
1684	0.927083	0.970588	0.866667	1	0.764706	0.6875	0.864407	0.833333	0.649718	0.903226	0.693333	1	1	0.892857	0.955224	0.989474	0.829991	0.814266
1685	0.90625	1	0.933333	0.958333	0.779412	0.601562	0.864407	0.869048	0.610169	0.83871	0.72	1	0.96875	0.885714	0.970149	0.989474	0.816042	0.799191
1686	0.895833	1	0.933333	0.958333	0.720588	0.71875	0.864407	0.785714	0.689266	0.903226	0.8	0.954545	0.96875	0.907143	0.970149	0.989474	0.839582	0.824812
1687	0.927083	1	0.866667	1	0.779412	0.65625	0.813559	0.833333	0.649718	0.709677	0.613333	1	0.96875	0.871429	0.985075	1	0.814298	0.797325
1688	0.927083	1	0.933333	1	0.691176	0.640625	0.898305	0.833333	0.632768	0.935484	0.693333	1	1	0.914286	0.985075	0.989474	0.826504	0.810815
1689	0.947917	1	0.933333	1	0.705882	0.6875	0.79661	0.785714	0.700565	0.903226	0.706667	1	0.9375	0.885714	0.970149	1	0.830863	0.814813
1690	0.916667	1	0.933333	0.958333	0.661765	0.710938	0.830508	0.833333	0.728814	0.806452	0.76	1	0.96875	0.871429	0.985075	0.989474	0.836966	0.821672
1691	0.885417	0.970588	0.933333	1	0.588235	0.65625	0.762712	0.77381	0.649718	0.870968	0.653333	0.954545	0.90625	0.878571	0.985075	0.989474	0.796861	0.778037
1692	0.916667	1	1	1	0.691176	0.671875	0.847458	0.809524	0.711864	0.741935	0.706667	0.909091	0.96875	0.914286	0.985075	0.989474	0.830863	0.814792
1693	0.916667	1	0.933333	0.958333	0.75	0.726562	0.864407	0.857143	0.677966	0.870968	0.573333	0.909091	1	0.9	0.970149	0.989474	0.830863	0.815143
1694	0.96875	0.970588	0.933333	0.958333	0.735294	0.703125	0.847458	0.869048	0.672316	0.774194	0.693333	1	0.9375	0.878571	0.955224	0.989474	0.831735	0.816218
1695	0.875	0.970588	1	1	0.661765	0.632812	0.847458	0.833333	0.677966	0.774194	0.56	0.954545	0.9375	0.892857	0.985075	1	0.806452	0.788323
1696	0.947917	0.970588	0.866667	0.916667	0.808824	0.632812	0.949153	0.833333	0.638418	0.903226	0.693333	1	1	0.885714	0.985075	0.989474	0.829991	0.814314
1697	0.927083	1	0.933333	1	0.764706	0.6875	0.830508	0.880952	0.632768	0.83871	0.733333	0.954545	1	0.885714	0.970149	0.989474	0.830863	0.815228
1698	0.916667	1	0.933333	0.958333	0.676471	0.726562	0.881356	0.869048	0.627119	0.903226	0.706667	0.909091	1	0.885714	0.970149	0.989474	0.828248	0.812702
1699	0.958333	1	0.933333	1	0.691176	0.71875	0.898305	0.892857	0.694915	0.870968	0.72	1	1	0.921429	0.970149	0.989474	0.851787	0.838219
1700	0.927083	0.970588	0.933333	1	0.617647	0.554688	0.881356	0.845238	0.706215	0.903226	0.64	1	0.9375	0.885714	0.985075	0.989474	0.813426	0.796231
1701	0.927083	0.970588	0.933333	1	0.588235	0.671875	0.932203	0.845238	0.666667	0.935484	0.666667	0.954545	1	0.907143	0.970149	0.989474	0.826504	0.810205
1702	0.9375	0.970588	0.933333	0.916667	0.691176	0.679688	0.949153	0.845238	0.677966	0.870968	0.56	0.954545	1	0.9	0.970149	0.989474	0.825632	0.809448
1703	0.895833	1	0.866667	0.958333	0.705882	0.664062	0.864407	0.904762	0.632768	0.935484	0.613333	1	0.96875	0.892857	0.985075	0.989474	0.820401	0.804078
1704	0.885417	0.970588	1	0.958333	0.75	0.664062	0.915254	0.845238	0.672316	0.870968	0.706667	1	1	0.878571	1	0.989474	0.831735	0.816395
1705	0.9375	1	0.933333	1	0.823529	0.65625	0.813559	0.797619	0.677966	0.903226	0.653333	1	0.9375	0.892857	0.985075	0.989474	0.829119	0.813167
1706	0.90625	0.970588	0.933333	1	0.691176	0.671875	0.915254	0.785714	0.672316	0.903226	0.653333	1	0.9375	0.885714	0.970149	0.989474	0.821273	0.804498
1707	0.947917	0.970588	1	1	0.705882	0.625	0.898305	0.857143	0.711864	0.83871	0.706667	0.954545	1	0.907143	0.955224	0.989474	0.836094	0.820665
1708	0.90625	1	0.933333	1	0.735294	0.75	0.830508	0.845238	0.644068	0.83871	0.68	0.954545	0.96875	0.907143	0.985075	0.989474	0.832607	0.817075
1709	0.916667	0.970588	1	1	0.735294	0.703125	0.864407	0.857143	0.672316	0.935484	0.746667	1	0.96875	0.9	0.970149	0.989474	0.841325	0.826591
1710	0.947917	0.970588	0.933333	1	0.647059	0.765625	0.864407	0.845238	0.655367	0.870968	0.706667	1	0.9375	0.885714	0.955224	0.989474	0.833479	0.818194
1711	0.9375	1	0.866667	1	0.632353	0.664062	0.847458	0.869048	0.649718	0.741935	0.546667	1	0.90625	0.914286	0.985075	0.989474	0.810811	0.793423
1712	0.833333	0.970588	0.933333	0.958333	0.573529	0.671875	0.779661	0.785714	0.689266	0.870968	0.72	0.909091	1	0.9	1	0.989474	0.809939	0.792091
1713	0.927083	1	1	1	0.661765	0.679688	0.813559	0.857143	0.610169	0.903226	0.693333	0.909091	0.96875	0.907143	0.970149	0.989474	0.818657	0.802184
1714	0.927083	1	1	1	0.691176	0.585938	0.813559	0.797619	0.723164	0.83871	0.76	1	1	0.885714	0.955224	0.989474	0.82476	0.808239
1715	0.90625	1	1	0.958333	0.647059	0.695312	0.898305	0.857143	0.683616	0.870968	0.693333	0.954545	1	0.928571	0.985075	0.989474	0.836966	0.821922
1716	0.895833	0.970588	0.933333	1	0.705882	0.664062	0.79661	0.857143	0.683616	0.806452	0.76	1	1	0.871429	0.955224	0.989474	0.82476	0.80836
1717	0.927083	1	1	0.958333	0.705882	0.617188	0.881356	0.845238	0.615819	0.903226	0.653333	0.954545	0.9375	0.885714	0.985075	0.989474	0.812554	0.79521
1718	0.927083	1	1	0.958333	0.75	0.703125	0.79661	0.785714	0.649718	0.903226	0.666667	1	0.96875	0.892857	0.970149	0.989474	0.823888	0.807623
1719	0.947917	0.970588	1	1	0.691176	0.710938	0.881356	0.857143	0.661017	0.870968	0.666667	0.954545	1	0.878571	0.985075	0.989474	0.832607	0.817285
1720	0.885417	0.970588	1	1	0.661765	0.6875	0.847458	0.797619	0.655367	0.870968	0.733333	0.954545	1	0.871429	0.970149	0.989474	0.818657	0.801896
1721	0.90625	1	0.933333	1	0.676471	0.664062	0.847458	0.785714	0.717514	0.806452	0.64	1	0.9375	0.907143	1	0.989474	0.82476	0.808124
1722	0.916667	1	1	1	0.691176	0.632812	0.813559	0.857143	0.672316	0.83871	0.706667	0.909091	0.90625	0.9	0.970149	0.989474	0.820401	0.803775
1723	0.947917	1	0.933333	0.958333	0.661765	0.648438	0.745763	0.857143	0.610169	0.806452	0.68	1	0.90625	0.9	0.985075	0.989474	0.808195	0.790637
1724	0.90625	1	0.933333	0.958333	0.720588	0.65625	0.779661	0.845238	0.689266	0.774194	0.653333	0.954545	0.90625	0.878571	0.970149	0.989474	0.81517	0.797796
1725	0.947917	1	1	1	0.705882	0.71875	0.898305	0.857143	0.694915	0.83871	0.693333	0.954545	0.96875	0.892857	0.985075	1	0.843941	0.829604
1726	0.927083	1	0.933333	1	0.632353	0.632812	0.881356	0.797619	0.666667	0.903226	0.746667	0.954545	0.9375	0.892857	0.955224	0.989474	0.819529	0.802708
1727	0.9375	1	1	1	0.691176	0.6875	0.830508	0.821429	0.706215	0.903226	0.666667	1	0.96875	0.9	0.985075	0.989474	0.835222	0.820015
1728	0.916667	1	1	1	0.720588	0.648438	0.830508	0.857143	0.683616	0.806452	0.693333	0.954545	0.9375	0.885714	0.985075	0.989474	0.825632	0.809336
1729	0.9375	1	0.866667	1	0.720588	0.617188	0.864407	0.880952	0.689266	0.903226	0.68	0.909091	0.90625	0.921429	1	0.989474	0.831735	0.816249
1730	0.895833	1	0.933333	1	0.735294	0.609375	0.728814	0.809524	0.683616	0.774194	0.626667	1	0.96875	0.878571	0.970149	0.989474	0.80558	0.787269
1731	0.895833	0.970588	0.933333	0.958333	0.647059	0.648438	0.898305	0.797619	0.694915	0.903226	0.706667	0.772727	0.90625	0.892857	0.970149	0.989474	0.816914	0.79951
1732	0.90625	0.970588	1	1	0.705882	0.632812	0.881356	0.845238	0.677966	0.83871	0.72	1	0.96875	0.921429	0.955224	0.989474	0.829119	0.81319
1733	0.895833	0.970588	1	1	0.676471	0.609375	0.864407	0.797619	0.762712	0.83871	0.68	1	1	0.892857	0.955224	0.989474	0.827376	0.811197
1734	0.9375	0.970588	0.866667	1	0.676471	0.609375	0.847458	0.785714	0.683616	0.774194	0.72	0.954545	1	0.864286	0.985075	0.989474	0.813426	0.795896
1735	0.927083	1	0.933333	0.958333	0.720588	0.710938	0.813559	0.869048	0.717514	0.903226	0.64	1	0.9375	0.885714	0.970149	0.989474	0.836094	0.820632
1736	0.947917	1	1	1	0.705882	0.65625	0.813559	0.809524	0.689266	0.741935	0.6	0.954545	0.96875	0.878571	0.985075	0.989474	0.816914	0.799762
1737	0.947917	1	0.933333	1	0.691176	0.648438	0.813559	0.845238	0.661017	0.709677	0.6	0.954545	1	0.914286	0.970149	0.989474	0.816042	0.798789
1738	0.916667	1	1	1	0.676471	0.617188	0.813559	0.821429	0.711864	0.903226	0.626667	1	0.96875	0.9	0.985075	0.989474	0.822145	0.80543
1739	0.90625	0.970588	0.933333	1	0.705882	0.65625	0.915254	0.845238	0.672316	0.903226	0.706667	0.909091	0.96875	0.892857	0.985075	0.989474	0.829119	0.813026
1740	0.9375	0.941176	1	1	0.676471	0.703125	0.847458	0.833333	0.644068	0.870968	0.693333	1	0.96875	0.892857	0.955224	0.989474	0.82476	0.808606
1741	0.875	1	1	0.958333	0.779412	0.6875	0.813559	0.833333	0.632768	0.935484	0.6	0.954545	1	0.914286	0.985075	0.989474	0.821273	0.804946
1742	0.916667	0.970588	0.933333	1	0.676471	0.648438	0.830508	0.785714	0.666667	0.83871	0.653333	1	0.90625	0.885714	0.970149	1	0.811683	0.793953
1743	0.916667	0.970588	0.933333	1	0.720588	0.765625	0.847458	0.821429	0.706215	0.806452	0.706667	1	0.96875	0.892857	0.970149	0.989474	0.841325	0.826634
1744	0.885417	1	0.933333	0.958333	0.617647	0.65625	0.847458	0.785714	0.666667	0.903226	0.64	1	0.96875	0.9	0.985075	0.989474	0.811683	0.793852
1745	0.927083	0.970588	1	1	0.661765	0.703125	0.847458	0.809524	0.711864	0.935484	0.64	1	0.96875	0.892857	0.940299	0.989474	0.829991	0.81408
1746	0.958333	1	0.933333	1	0.779412	0.65625	0.881356	0.869048	0.649718	0.645161	0.68	1	1	0.907143	0.985075	0.989474	0.830863	0.815089
1747	0.9375	0.970588	0.933333	0.958333	0.735294	0.6875	0.79661	0.845238	0.621469	0.806452	0.666667	0.909091	0.96875	0.885714	0.970149	0.989474	0.81517	0.798401
1748	0.927083	0.970588	1	1	0.705882	0.703125	0.79661	0.821429	0.683616	0.870968	0.76	1	0.96875	0.892857	0.955224	0.989474	0.833479	0.817938
1749	0.916667	0.970588	0.933333	1	0.661765	0.671875	0.898305	0.797619	0.672316	0.967742	0.666667	0.954545	0.96875	0.914286	0.985075	0.989474	0.827376	0.811401
1750	0.916667	0.970588	1	0.958333	0.735294	0.679688	0.898305	0.892857	0.649718	0.967742	0.706667	0.909091	1	0.907143	0.985075	0.989474	0.837838	0.822852
1751	0.885417	1	1	1	0.676471	0.679688	0.881356	0.904762	0.632768	0.83871	0.64	0.954545	1	0.914286	0.985075	0.989474	0.82476	0.808594
1752	0.916667	0.970588	0.933333	1	0.691176	0.679688	0.881356	0.916667	0.621469	0.903226	0.693333	0.954545	1	0.885714	0.970149	0.989474	0.826504	0.810774
1753	0.895833	1	0.933333	1	0.691176	0.65625	0.932203	0.809524	0.661017	0.870968	0.586667	0.863636	1	0.892857	0.985075	0.989474	0.816042	0.798914
1754	0.916667	1	0.933333	1	0.794118	0.695312	0.881356	0.845238	0.644068	0.83871	0.68	1	0.96875	0.907143	0.970149	0.989474	0.833479	0.818167
1755	0.895833	1	0.933333	1	0.705882	0.679688	0.813559	0.869048	0.711864	0.83871	0.666667	1	1	0.892857	0.985075	0.989474	0.832607	0.817096
1756	0.90625	1	1	0.958333	0.75	0.609375	0.762712	0.821429	0.672316	0.967742	0.733333	0.954545	1	0.871429	0.970149	0.989474	0.819529	0.802541
1757	0.895833	1	1	0.958333	0.720588	0.71875	0.847458	0.892857	0.694915	0.870968	0.76	0.954545	0.96875	0.857143	0.970149	0.989474	0.83871	0.823974
1758	0.90625	1	1	1	0.691176	0.5625	0.898305	0.928571	0.649718	0.935484	0.706667	0.954545	1	0.864286	1	0.989474	0.821273	0.80484
1759	0.947917	1	1	1	0.720588	0.75	0.813559	0.833333	0.711864	0.935484	0.653333	0.909091	0.96875	0.878571	0.985075	0.989474	0.841325	0.826629
1760	0.947917	0.970588	0.933333	0.916667	0.691176	0.625	0.864407	0.785714	0.632768	0.903226	0.773333	0.954545	0.9375	0.921429	0.985075	0.989474	0.821273	0.804752
1761	0.927083	1	1	1	0.647059	0.65625	0.779661	0.785714	0.689266	0.806452	0.64	1	0.875	0.878571	0.955224	1	0.809939	0.792205
1762	0.916667	1	0.933333	0.958333	0.705882	0.640625	0.830508	0.809524	0.700565	0.774194	0.6	1	0.9375	0.892857	1	0.989474	0.816914	0.799766
1763	0.927083	1	1	1	0.75	0.6875	0.830508	0.821429	0.689266	1	0.653333	1	0.96875	0.907143	0.970149	0.989474	0.836966	0.821993
1764	0.9375	0.970588	1	1	0.647059	0.640625	0.830508	0.761905	0.615819	0.935484	0.706667	1	1	0.871429	1	0.989474	0.809939	0.792483
1765	0.90625	1	0.933333	1	0.720588	0.703125	0.932203	0.833333	0.59322	0.83871	0.693333	1	0.90625	0.914286	1	0.989474	0.82476	0.808911
1766	0.947917	0.970588	1	0.958333	0.632353	0.6875	0.728814	0.809524	0.655367	0.935484	0.626667	1	0.96875	0.885714	0.985075	0.989474	0.813426	0.796346
1767	0.927083	0.970588	0.866667	0.958333	0.705882	0.625	0.932203	0.892857	0.689266	0.806452	0.68	0.954545	0.96875	0.864286	0.985075	0.989474	0.825632	0.808988
1768	0.90625	1	0.933333	0.916667	0.647059	0.726562	0.881356	0.821429	0.644068	0.935484	0.72	1	0.96875	0.871429	0.970149	0.989474	0.82476	0.80884
1769	0.927083	1	0.933333	1	0.691176	0.664062	0.881356	0.833333	0.632768	0.870968	0.666667	1	0.9375	0.885714	0.940299	0.989474	0.816914	0.800163
1770	0.916667	0.970588	1	1	0.676471	0.695312	0.915254	0.869048	0.700565	0.806452	0.626667	0.954545	0.90625	0.928571	0.970149	0.989474	0.83435	0.818883
1771	0.947917	0.970588	0.933333	1	0.661765	0.71875	0.830508	0.77381	0.706215	0.903226	0.613333	1	0.96875	0.9	0.955224	0.989474	0.827376	0.811246
1772	0.9375	0.970588	0.933333	1	0.705882	0.679688	0.915254	0.869048	0.689266	0.935484	0.666667	1	0.96875	0.857143	0.970149	0.989474	0.833479	0.81805
1773	0.90625	0.970588	1	0.958333	0.75	0.679688	0.847458	0.857143	0.672316	0.709677	0.693333	0.909091	0.96875	0.892857	0.985075	0.989474	0.825632	0.80937
1774	0.958333	1	0.866667	0.958333	0.691176	0.78125	0.932203	0.821429	0.768362	0.935484	0.693333	1	0.96875	0.907143	0.985075	0.989474	0.863121	0.8502
1775	0.927083	1	0.933333	1	0.676471	0.671875	0.79661	0.77381	0.717514	0.935484	0.706667	1	0.96875	0.9	0.955224	0.989474	0.829119	0.813085
1776	0.916667	1	1	1	0.720588	0.632812	0.966102	0.845238	0.683616	0.903226	0.626667	1	0.9375	0.942857	1	0.989474	0.836966	0.822039
1777	0.916667	1	1	0.958333	0.676471	0.640625	0.898305	0.72619	0.638418	0.903226	0.626667	1	0.9375	0.878571	0.970149	0.989474	0.80558	0.787596
1778	0.90625	1	0.933333	1	0.838235	0.695312	0.813559	0.892857	0.689266	0.935484	0.706667	0.909091	1	0.871429	0.985075	0.989474	0.842197	0.827818
1779	0.90625	0.970588	1	1	0.764706	0.671875	0.830508	0.821429	0.683616	0.774194	0.706667	0.909091	0.90625	0.892857	0.970149	0.989474	0.82476	0.8083
1780	0.927083	1	0.933333	0.958333	0.691176	0.703125	0.915254	0.869048	0.677966	0.870968	0.706667	0.863636	0.90625	0.9	0.970149	0.989474	0.83435	0.818956
1781	0.9375	0.970588	0.933333	0.958333	0.676471	0.664062	0.813559	0.892857	0.734463	0.935484	0.64	1	0.90625	0.9	0.940299	0.989474	0.832607	0.816824
1782	0.916667	1	0.933333	0.958333	0.779412	0.679688	0.830508	0.880952	0.706215	0.83871	0.693333	1	1	0.9	0.970149	0.989474	0.840453	0.825358
1783	0.947917	1	0.933333	1	0.735294	0.65625	0.864407	0.785714	0.661017	1	0.68	1	0.90625	0.885714	0.985075	0.989474	0.826504	0.810488
1784	0.9375	1	0.933333	0.958333	0.720588	0.664062	0.79661	0.857143	0.672316	0.935484	0.653333	0.954545	0.9375	0.921429	1	0.989474	0.829991	0.814139
1785	0.958333	0.970588	0.933333	1	0.676471	0.710938	0.932203	0.809524	0.661017	0.935484	0.626667	0.954545	0.96875	0.878571	1	0.989474	0.829991	0.814752
1786	0.9375	1	0.933333	0.958333	0.676471	0.625	0.949153	0.821429	0.666667	0.870968	0.733333	1	1	0.857143	0.985075	0.989474	0.82476	0.80835
1787	0.916667	1	1	0.916667	0.720588	0.65625	0.864407	0.857143	0.649718	0.967742	0.6	0.954545	0.96875	0.928571	0.970149	0.989474	0.82476	0.808687
1788	0.9375	1	1	1	0.75	0.6875	0.830508	0.880952	0.655367	0.806452	0.693333	0.954545	0.9375	0.907143	0.955224	0.989474	0.831735	0.81629
1789	0.90625	1	1	1	0.661765	0.6875	0.830508	0.833333	0.666667	0.774194	0.68	0.954545	0.90625	0.9	0.985075	0.989474	0.820401	0.80344
1790	0.895833	0.970588	1	1	0.735294	0.710938	0.847458	0.785714	0.700565	0.806452	0.666667	1	1	0.878571	0.985075	1	0.829991	0.814111
1791	0.9375	0.970588	0.866667	1	0.676471	0.664062	0.881356	0.845238	0.677966	0.83871	0.68	1	0.9375	0.907143	0.985075	0.989474	0.828248	0.812044
1792	0.9375	0.970588	1	0.958333	0.75	0.664062	0.779661	0.797619	0.621469	0.870968	0.653333	1	0.96875	0.885714	0.985075	0.989474	0.813426	0.796362
1793	0.895833	1	0.933333	1	0.75	0.65625	0.79661	0.833333	0.745763	0.870968	0.693333	1	1	0.878571	0.985075	0.989474	0.835222	0.819748
1794	0.864583	1	1	0.916667	0.647059	0.648438	0.79661	0.714286	0.655367	0.903226	0.706667	1	0.96875	0.892857	0.955224	0.989474	0.802964	0.784437
1795	0.916667	1	1	0.916667	0.661765	0.710938	0.915254	0.797619	0.627119	0.935484	0.733333	1	0.96875	0.864286	0.970149	0.989474	0.823017	0.806885
1796	0.875	1	1	0.958333	0.602941	0.671875	0.79661	0.845238	0.700565	0.806452	0.613333	0.954545	0.9375	0.892857	0.985075	0.989474	0.812554	0.794934
1797	0.947917	1	1	0.958333	0.617647	0.710938	0.830508	0.904762	0.621469	0.774194	0.573333	0.909091	0.9375	0.885714	0.985075	0.989474	0.812554	0.795525
1798	0.895833	0.970588	1	1	0.632353	0.65625	0.949153	0.892857	0.717514	0.870968	0.653333	0.954545	0.90625	0.914286	1	0.989474	0.835222	0.81983
1799	0.927083	1	0.933333	0.916667	0.676471	0.640625	0.847458	0.821429	0.689266	0.83871	0.546667	0.909091	0.90625	0.892857	0.970149	0.989474	0.809067	0.791182
1800	0.927083	0.941176	1	0.958333	0.735294	0.65625	0.830508	0.833333	0.689266	0.967742	0.746667	1	0.96875	0.907143	0.970149	0.989474	0.836094	0.820792
1801	0.864583	1	0.933333	0.916667	0.720588	0.710938	0.813559	0.809524	0.689266	0.806452	0.546667	0.954545	1	0.907143	0.985075	0.989474	0.816914	0.799843
1802	0.96875	0.970588	0.933333	0.958333	0.779412	0.671875	0.830508	0.833333	0.615819	1	0.76	1	1	0.864286	0.970149	0.989474	0.829991	0.814417
1803	0.90625	1	0.866667	1	0.794118	0.65625	0.745763	0.869048	0.621469	0.83871	0.706667	0.954545	0.96875	0.914286	0.955224	0.989474	0.819529	0.802974
1804	0.895833	0.970588	0.933333	0.958333	0.764706	0.703125	0.864407	0.809524	0.644068	0.806452	0.786667	1	0.96875	0.878571	0.970149	0.989474	0.828248	0.812774
1805	0.9375	1	0.933333	1	0.705882	0.617188	0.881356	0.928571	0.694915	0.870968	0.72	1	0.9375	0.864286	0.970149	0.989474	0.832607	0.817034
1806	0.875	0.970588	1	1	0.764706	0.640625	0.864407	0.833333	0.677966	0.741935	0.613333	0.909091	0.9375	0.878571	0.970149	0.989474	0.812554	0.795046
1807	0.885417	1	0.933333	0.916667	0.691176	0.664062	0.898305	0.833333	0.711864	0.806452	0.613333	1	0.96875	0.885714	0.955224	0.989474	0.821273	0.804614
1808	0.947917	1	0.866667	0.958333	0.632353	0.640625	0.932203	0.833333	0.706215	0.935484	0.64	1	1	0.928571	0.970149	0.989474	0.833479	0.818028
1809	0.84375	0.970588	0.866667	1	0.647059	0.742188	0.898305	0.869048	0.615819	0.935484	0.746667	1	0.96875	0.871429	0.970149	0.989474	0.823017	0.807091
1810	0.90625	0.941176	0.933333	0.958333	0.720588	0.664062	0.813559	0.809524	0.694915	0.806452	0.64	0.954545	0.96875	0.885714	0.985075	0.989474	0.817786	0.80063
1811	0.916667	1	0.933333	0.958333	0.661765	0.640625	0.881356	0.845238	0.694915	0.83871	0.666667	1	0.96875	0.914286	0.940299	0.989474	0.82476	0.808393
1812	0.96875	0.970588	1	1	0.705882	0.65625	0.79661	0.845238	0.59322	0.870968	0.706667	0.954545	0.96875	0.9	0.985075	0.989474	0.817786	0.801061
1813	0.875	1	1	0.958333	0.808824	0.617188	0.847458	0.845238	0.689266	0.870968	0.613333	1	0.875	0.914286	0.985075	0.989474	0.823017	0.806493
1814	0.895833	1	0.933333	0.958333	0.676471	0.648438	0.830508	0.77381	0.689266	0.935484	0.653333	1	0.9375	0.907143	0.985075	0.989474	0.818657	0.801573
1815	0.885417	0.970588	0.933333	0.916667	0.735294	0.640625	0.830508	0.809524	0.649718	0.806452	0.706667	0.909091	1	0.857143	0.955224	0.989474	0.807323	0.789578
1816	0.916667	1	1	0.958333	0.691176	0.726562	0.898305	0.714286	0.700565	0.935484	0.68	0.954545	1	0.885714	0.970149	0.989474	0.830863	0.814926
1817	0.947917	0.970588	0.933333	1	0.691176	0.625	0.881356	0.892857	0.587571	0.903226	0.613333	1	1	0.921429	0.955224	0.989474	0.81517	0.798382
1818	0.885417	0.970588	0.933333	0.916667	0.75	0.6875	0.915254	0.857143	0.677966	0.806452	0.773333	1	0.96875	0.9	1	0.989474	0.83871	0.823908
1819	0.9375	1	0.933333	1	0.691176	0.625	0.864407	0.857143	0.638418	0.903226	0.68	0.954545	0.9375	0.885714	0.985075	0.989474	0.818657	0.802149
1820	0.90625	1	1	1	0.691176	0.695312	0.830508	0.833333	0.638418	0.774194	0.72	0.954545	1	0.885714	0.985075	0.989474	0.822145	0.805867
1821	0.90625	0.970588	0.933333	1	0.691176	0.703125	0.864407	0.833333	0.700565	0.870968	0.666667	1	0.90625	0.921429	0.970149	0.989474	0.833479	0.817935
1822	0.927083	1	1	1	0.779412	0.765625	0.813559	0.77381	0.734463	0.806452	0.626667	1	0.90625	0.892857	0.985075	0.989474	0.840453	0.825513
1823	0.927083	0.970588	0.933333	1	0.720588	0.679688	0.79661	0.880952	0.666667	0.903226	0.72	0.909091	1	0.907143	0.955224	0.989474	0.831735	0.816507
1824	0.979167	1	0.866667	0.958333	0.647059	0.742188	0.881356	0.880952	0.632768	0.83871	0.68	0.954545	0.9375	0.871429	0.970149	0.989474	0.828248	0.812789
1825	0.90625	0.970588	0.933333	0.958333	0.764706	0.664062	0.898305	0.785714	0.683616	0.709677	0.693333	0.954545	1	0.878571	0.985075	0.989474	0.823017	0.806477
1826	0.927083	0.970588	0.933333	0.958333	0.735294	0.65625	0.898305	0.785714	0.621469	0.903226	0.666667	1	0.90625	0.885714	0.970149	0.989474	0.814298	0.797044
1827	0.9375	0.970588	1	0.958333	0.735294	0.757812	0.864407	0.833333	0.672316	0.870968	0.666667	1	0.9375	0.871429	0.955224	0.989474	0.83435	0.819192
1828	0.916667	0.970588	1	0.958333	0.720588	0.71875	0.779661	0.833333	0.615819	0.870968	0.653333	1	0.96875	0.871429	0.970149	0.989474	0.81517	0.798487
1829	0.885417	0.970588	0.933333	1	0.705882	0.609375	0.830508	0.797619	0.711864	0.741935	0.706667	0.954545	1	0.892857	0.985075	0.989474	0.817786	0.800486
1830	0.90625	0.970588	0.866667	1	0.705882	0.703125	0.881356	0.869048	0.711864	0.903226	0.72	0.954545	0.90625	0.871429	0.970149	0.989474	0.836094	0.820669
1831	0.916667	1	1	1	0.676471	0.617188	0.79661	0.809524	0.644068	0.806452	0.693333	0.954545	1	0.857143	0.970149	0.989474	0.80558	0.787658
1832	0.875	0.970588	1	1	0.691176	0.671875	0.949153	0.880952	0.677966	0.806452	0.733333	0.954545	0.9375	0.907143	0.985075	0.989474	0.83435	0.818807
1833	0.927083	1	0.933333	1	0.764706	0.734375	0.898305	0.845238	0.683616	0.967742	0.64	0.954545	0.96875	0.9	0.970149	0.989474	0.843069	0.82887
1834	0.916667	0.970588	1	1	0.705882	0.625	0.881356	0.869048	0.723164	0.806452	0.72	0.954545	0.96875	0.892857	0.985075	1	0.835222	0.819838
1835	0.90625	1	0.933333	0.958333	0.735294	0.65625	0.847458	0.809524	0.700565	0.870968	0.64	0.909091	1	0.914286	0.985075	0.989474	0.827376	0.811271
1836	0.916667	1	0.866667	1	0.691176	0.71875	0.932203	0.869048	0.677966	0.903226	0.666667	1	0.96875	0.871429	0.955224	0.989474	0.83435	0.818876
1837	0.9375	0.970588	0.866667	1	0.661765	0.710938	0.830508	0.809524	0.644068	0.677419	0.626667	0.909091	0.96875	0.878571	0.985075	0.989474	0.809939	0.792401
1838	0.895833	0.970588	1	1	0.691176	0.710938	0.79661	0.904762	0.683616	0.935484	0.733333	1	0.96875	0.9	0.955224	0.989474	0.837838	0.822726
1839	0.927083	1	1	0.875	0.779412	0.703125	0.915254	0.857143	0.621469	0.935484	0.733333	0.954545	1	0.885714	0.955224	0.989474	0.83435	0.819152
1840	0.947917	1	0.933333	0.958333	0.705882	0.734375	0.898305	0.869048	0.706215	0.903226	0.6	0.909091	0.96875	0.885714	0.955224	0.989474	0.837838	0.822765
1841	0.864583	0.970588	0.866667	1	0.720588	0.601562	0.813559	0.785714	0.677966	0.806452	0.68	1	1	0.878571	0.985075	0.989474	0.807323	0.789068
1842	0.916667	1	0.933333	1	0.632353	0.640625	0.898305	0.857143	0.694915	0.967742	0.586667	0.954545	1	0.892857	0.970149	0.989474	0.823017	0.80645
1843	0.9375	0.970588	1	1	0.691176	0.679688	0.830508	0.797619	0.711864	0.806452	0.733333	1	0.96875	0.892857	0.955224	0.989474	0.831735	0.815934
1844	0.895833	1	1	0.958333	0.661765	0.640625	0.881356	0.821429	0.655367	0.935484	0.72	0.954545	0.9375	0.864286	0.985075	0.989474	0.816914	0.799959
1845	0.895833	1	0.933333	1	0.632353	0.703125	0.932203	0.857143	0.683616	0.935484	0.68	0.909091	1	0.871429	0.955224	0.989474	0.829119	0.812977
1846	0.927083	1	0.933333	0.958333	0.676471	0.695312	0.915254	0.809524	0.655367	0.935484	0.64	0.954545	0.96875	0.871429	0.955224	0.989474	0.821273	0.804562
1847	0.9375	1	0.933333	0.958333	0.602941	0.65625	0.830508	0.797619	0.689266	0.83871	0.72	0.863636	0.96875	0.9	1	0.989474	0.820401	0.80341
1848	0.895833	1	1	1	0.705882	0.679688	0.813559	0.845238	0.677966	0.83871	0.64	0.954545	1	0.871429	0.970149	0.989474	0.820401	0.803452
1849	0.885417	0.941176	1	0.958333	0.75	0.710938	0.864407	0.821429	0.689266	0.774194	0.68	0.954545	1	0.864286	0.985075	0.989474	0.826504	0.810346
1850	0.927083	0.970588	1	0.916667	0.676471	0.648438	0.847458	0.77381	0.666667	0.741935	0.746667	0.954545	1	0.9	0.940299	0.989474	0.816042	0.798772
1851	0.90625	0.970588	0.933333	0.958333	0.691176	0.585938	0.932203	0.785714	0.632768	0.903226	0.666667	0.863636	0.96875	0.907143	0.970149	0.989474	0.807323	0.789601
1852	0.9375	0.970588	1	1	0.720588	0.632812	0.762712	0.809524	0.672316	0.741935	0.64	0.954545	0.90625	0.871429	0.940299	0.989474	0.80558	0.787902
1853	0.90625	0.970588	1	1	0.661765	0.710938	0.881356	0.785714	0.615819	0.83871	0.706667	0.954545	1	0.921429	0.940299	0.989474	0.819529	0.802953
1854	0.927083	1	0.866667	0.958333	0.617647	0.671875	0.745763	0.821429	0.694915	0.870968	0.68	0.863636	0.96875	0.9	0.985075	0.989474	0.816914	0.799576
1855	0.916667	0.970588	0.933333	1	0.794118	0.664062	0.864407	0.880952	0.677966	0.903226	0.68	0.954545	0.9375	0.892857	0.985075	0.989474	0.835222	0.819972
1856	0.895833	0.970588	0.933333	0.916667	0.764706	0.617188	0.813559	0.797619	0.553672	0.903226	0.68	0.954545	0.96875	0.907143	0.970149	0.989474	0.798605	0.780247
1857	0.875	0.970588	1	0.958333	0.691176	0.703125	0.881356	0.821429	0.694915	0.83871	0.666667	0.954545	0.9375	0.907143	0.985075	0.989474	0.828248	0.812295
1858	0.927083	1	0.933333	1	0.764706	0.664062	0.864407	0.72619	0.655367	0.709677	0.693333	1	0.96875	0.885714	0.955224	0.989474	0.81517	0.797678
1859	0.84375	0.970588	0.933333	0.958333	0.676471	0.632812	0.79661	0.821429	0.632768	0.903226	0.68	1	0.96875	0.871429	0.985075	0.989474	0.802092	0.783842
1860	0.927083	1	0.933333	0.958333	0.676471	0.734375	0.898305	0.833333	0.677966	0.870968	0.706667	0.909091	1	0.871429	0.955224	0.989474	0.832607	0.817082
1861	0.916667	1	1	0.958333	0.794118	0.664062	0.813559	0.809524	0.694915	0.83871	0.666667	0.909091	0.96875	0.914286	0.955224	0.989474	0.829119	0.813103
1862	0.895833	1	0.933333	1	0.75	0.648438	0.898305	0.77381	0.581921	0.903226	0.666667	1	1	0.892857	0.970149	0.989474	0.809939	0.79247
1863	0.90625	0.941176	1	1	0.705882	0.65625	0.79661	0.809524	0.683616	0.83871	0.76	1	0.96875	0.892857	0.940299	0.989474	0.823017	0.806338
1864	0.927083	0.970588	1	0.958333	0.735294	0.601562	0.847458	0.869048	0.677966	0.806452	0.666667	0.863636	0.96875	0.9	0.955224	0.989474	0.818657	0.802018
1865	0.875	0.941176	0.866667	1	0.691176	0.640625	0.864407	0.845238	0.644068	0.967742	0.733333	0.909091	0.96875	0.907143	0.955224	0.989474	0.818657	0.801874
1866	0.916667	0.970588	0.933333	1	0.617647	0.671875	0.711864	0.77381	0.683616	0.967742	0.68	0.909091	0.96875	0.871429	0.955224	0.989474	0.808195	0.790049
1867	0.916667	1	0.866667	1	0.75	0.632812	0.830508	0.845238	0.644068	0.806452	0.68	1	0.9375	0.914286	0.970149	0.989474	0.819529	0.802856
1868	0.90625	0.970588	1	1	0.735294	0.632812	0.830508	0.857143	0.723164	0.870968	0.666667	0.954545	0.9375	0.871429	0.940299	0.989474	0.82476	0.808439
1869	0.875	1	1	1	0.691176	0.671875	0.813559	0.821429	0.627119	0.806452	0.613333	0.954545	0.96875	0.878571	0.955224	0.989474	0.803836	0.78565
1870	0.927083	1	0.933333	1	0.691176	0.625	0.932203	0.845238	0.553672	0.774194	0.626667	0.954545	1	0.914286	0.985075	0.989474	0.80558	0.788
1871	0.90625	1	0.933333	1	0.705882	0.65625	0.813559	0.857143	0.644068	0.83871	0.6	0.954545	0.96875	0.907143	0.940299	0.989474	0.812554	0.7951
1872	0.958333	0.970588	1	1	0.676471	0.671875	0.830508	0.892857	0.649718	0.870968	0.72	0.863636	0.96875	0.885714	0.955224	0.989474	0.826504	0.810302
1873	0.90625	1	1	1	0.720588	0.75	0.864407	0.809524	0.745763	0.935484	0.613333	0.909091	0.9375	0.9	0.940299	0.989474	0.840453	0.825536
1874	0.916667	1	0.933333	1	0.617647	0.703125	0.898305	0.904762	0.621469	0.935484	0.6	1	0.96875	0.885714	0.985075	0.989474	0.821273	0.805289
1875	0.9375	0.970588	1	1	0.720588	0.679688	0.779661	0.77381	0.706215	0.870968	0.693333	0.954545	0.96875	0.864286	0.955224	0.989474	0.823017	0.806428
1876	0.90625	0.941176	0.8	0.958333	0.661765	0.640625	0.864407	0.761905	0.60452	0.806452	0.693333	0.954545	0.9375	0.892857	0.925373	0.989474	0.795118	0.776309
1877	0.90625	0.941176	1	1	0.661765	0.703125	0.966102	0.857143	0.689266	0.935484	0.706667	0.954545	0.96875	0.9	0.955224	0.989474	0.83871	0.823682
1878	0.90625	0.970588	0.933333	0.958333	0.75	0.671875	0.915254	0.821429	0.774011	0.903226	0.666667	1	0.9375	0.885714	0.955224	0.989474	0.842197	0.827379
1879	0.916667	1	0.933333	1	0.661765	0.65625	0.762712	0.797619	0.672316	0.83871	0.693333	0.954545	1	0.892857	0.970149	0.989474	0.81517	0.797978
1880	0.916667	1	0.866667	0.958333	0.691176	0.710938	0.830508	0.77381	0.677966	0.903226	0.68	1	1	0.892857	0.985075	0.989474	0.826504	0.810508
1881	0.927083	1	0.933333	0.958333	0.661765	0.65625	0.881356	0.845238	0.632768	0.903226	0.586667	0.954545	0.96875	0.871429	0.970149	0.989474	0.809939	0.792649
1882	0.916667	1	0.933333	1	0.661765	0.6875	0.779661	0.845238	0.649718	0.935484	0.706667	0.909091	1	0.892857	0.970149	0.989474	0.822145	0.805409
1883	0.927083	1	0.933333	1	0.647059	0.679688	0.847458	0.892857	0.706215	0.903226	0.653333	0.863636	0.875	0.914286	0.985075	0.989474	0.831735	0.815904
1884	0.9375	0.970588	1	0.958333	0.691176	0.648438	0.881356	0.821429	0.610169	0.870968	0.666667	0.909091	1	0.878571	0.970149	0.989474	0.811683	0.794773
1885	0.9375	0.970588	1	0.875	0.661765	0.640625	0.847458	0.857143	0.638418	0.83871	0.626667	1	1	0.914286	0.940299	0.989474	0.813426	0.796009
1886	0.927083	1	0.866667	1	0.705882	0.6875	0.898305	0.880952	0.655367	0.806452	0.546667	0.954545	1	0.9	0.955224	0.989474	0.821273	0.804875
1887	0.927083	1	1	1	0.588235	0.664062	0.830508	0.821429	0.666667	0.870968	0.68	0.954545	1	0.9	0.955224	0.989474	0.817786	0.800737
1888	0.895833	1	0.933333	0.958333	0.735294	0.625	0.881356	0.845238	0.638418	0.903226	0.706667	1	1	0.907143	0.925373	0.989474	0.820401	0.804138
1889	0.927083	1	1	0.958333	0.720588	0.71875	0.847458	0.821429	0.59322	0.903226	0.6	0.954545	1	0.907143	0.955224	0.989474	0.816914	0.800338
1890	0.90625	1	1	0.958333	0.720588	0.65625	0.881356	0.833333	0.60452	0.774194	0.666667	0.909091	0.96875	0.878571	0.955224	0.989474	0.808195	0.790725
1891	0.958333	0.970588	0.933333	1	0.705882	0.671875	0.830508	0.797619	0.649718	0.935484	0.68	0.954545	1	0.885714	0.985075	0.989474	0.823888	0.807558
1892	0.927083	0.970588	1	0.958333	0.647059	0.679688	0.847458	0.833333	0.700565	0.903226	0.693333	1	1	0.878571	0.970149	0.989474	0.829119	0.8132
1893	0.947917	1	1	0.916667	0.661765	0.625	0.779661	0.797619	0.666667	0.870968	0.706667	1	1	0.928571	0.955224	0.989474	0.819529	0.802628
1894	0.927083	0.970588	0.933333	1	0.676471	0.679688	0.847458	0.797619	0.649718	0.83871	0.653333	0.954545	1	0.885714	0.940299	1	0.81517	0.797862
1895	0.895833	1	0.933333	1	0.779412	0.726562	0.847458	0.833333	0.711864	0.806452	0.573333	0.954545	0.96875	0.878571	0.970149	0.989474	0.829991	0.814306
1896	0.90625	0.970588	0.933333	1	0.691176	0.640625	0.932203	0.809524	0.694915	0.806452	0.706667	0.863636	1	0.907143	0.970149	0.989474	0.826504	0.810306
1897	0.9375	0.970588	0.933333	0.958333	0.647059	0.710938	0.847458	0.809524	0.706215	0.774194	0.733333	0.954545	1	0.9	0.970149	0.989474	0.832607	0.817138
1898	0.9375	0.970588	0.933333	1	0.632353	0.695312	0.79661	0.821429	0.683616	0.935484	0.706667	0.909091	1	0.892857	0.985075	0.989474	0.827376	0.81137
1899	0.927083	1	0.866667	0.958333	0.691176	0.601562	0.949153	0.869048	0.649718	0.741935	0.68	1	0.96875	0.928571	0.985075	1	0.823888	0.807673
1900	0.895833	0.970588	1	0.916667	0.735294	0.695312	0.898305	0.869048	0.632768	0.83871	0.706667	1	1	0.907143	0.955224	0.989474	0.829119	0.813355
1901	0.9375	1	1	0.958333	0.691176	0.679688	0.898305	0.845238	0.661017	0.903226	0.68	1	1	0.892857	0.955224	0.989474	0.830863	0.815332

## Sheet: k-Nearest neighbor
Number of features	5C-condition cultured human primary hepatocyte	Cultured human primary intrahepatic biliary epithelial cell	Definitive endoderm	Endoderm stem cell (EnSC)	EnSC-derived cholangiocyte	EnSC-derived EGFi-untreated hepatocyte	EnSC-derived hepatic endoderm	EnSC-derived hepatoblast	EnSC-derived hepatocyte	EnSC-derived immature hepatocyte	EnSC-derived TPPB-untreated cholangiocyte	Hepatocyte derived from ProliHH P2 through 3D maturation	Hepatocyte derived from ProliHH P5 through 3D maturation	Human embryonic stem cell-derived hepatocyte-like cell	Sorted ALB+ CYP3A4+ EnSC-derived hepatocyte	Uncultured adult human primary hepatocyte	ACC	MCC
1	0.458333	0.352941	0.8	0.291667	0.367647	0.1875	0.389831	0.166667	0.090395	0.290323	0.293333	0.318182	0.40625	0.2	0.208955	0.778947	0.299913	0.250129
2	0.802083	0.882353	0.933333	0.833333	0.705882	0.351562	0.627119	0.428571	0.214689	0.709677	0.653333	0.545455	0.71875	0.292857	0.626866	0.926316	0.542284	0.508652
3	0.822917	0.882353	1	0.958333	0.676471	0.367188	0.694915	0.547619	0.225989	0.612903	0.68	0.772727	0.84375	0.285714	0.567164	0.936842	0.564952	0.532345
4	0.9375	0.911765	1	1	0.661765	0.445312	0.610169	0.583333	0.254237	0.774194	0.76	0.818182	0.875	0.314286	0.641791	0.989474	0.610288	0.582139
5	0.96875	0.941176	1	0.958333	0.705882	0.414062	0.677966	0.607143	0.271186	0.83871	0.706667	0.909091	0.9375	0.435714	0.776119	0.989474	0.644289	0.617806
6	0.927083	1	1	1	0.705882	0.414062	0.711864	0.571429	0.276836	0.645161	0.773333	0.954545	0.90625	0.4	0.686567	0.989474	0.632956	0.605158
7	0.958333	1	1	0.958333	0.794118	0.453125	0.694915	0.583333	0.305085	0.774194	0.72	0.954545	0.9375	0.414286	0.820896	0.989474	0.659111	0.633121
8	0.947917	0.970588	1	0.958333	0.735294	0.429688	0.79661	0.535714	0.288136	0.83871	0.706667	0.954545	0.875	0.378571	0.731343	0.989474	0.63993	0.612548
9	0.875	0.970588	1	1	0.779412	0.46875	0.762712	0.595238	0.265537	0.870968	0.826667	0.954545	0.90625	0.435714	0.776119	0.989474	0.659983	0.634196
10	0.9375	1	1	0.958333	0.705882	0.421875	0.779661	0.607143	0.282486	0.83871	0.746667	1	0.9375	0.421429	0.895522	0.989474	0.660854	0.634715
11	0.96875	1	1	0.916667	0.779412	0.453125	0.847458	0.72619	0.333333	0.870968	0.76	0.954545	0.90625	0.528571	0.80597	0.989474	0.698344	0.675183
12	0.927083	1	1	1	0.779412	0.554688	0.864407	0.666667	0.276836	0.967742	0.84	1	1	0.585714	0.835821	0.968421	0.714037	0.692589
13	0.875	1	1	0.958333	0.779412	0.5625	0.847458	0.678571	0.288136	0.935484	0.773333	0.909091	0.96875	0.635714	0.791045	0.978947	0.707934	0.685777
14	0.9375	1	1	1	0.779412	0.578125	0.881356	0.654762	0.282486	0.903226	0.826667	0.954545	0.96875	0.578571	0.746269	0.978947	0.708806	0.686561
15	0.947917	1	1	1	0.764706	0.570312	0.79661	0.72619	0.282486	0.870968	0.8	0.909091	0.96875	0.592857	0.850746	0.968421	0.712293	0.689966
16	0.9375	0.911765	1	1	0.779412	0.585938	0.813559	0.72619	0.293785	0.870968	0.773333	0.954545	1	0.6	0.835821	0.989474	0.71578	0.693871
17	0.947917	0.941176	1	1	0.867647	0.578125	0.898305	0.654762	0.310734	0.903226	0.826667	0.954545	0.9375	0.592857	0.820896	0.968421	0.722755	0.701444
18	0.958333	1	1	0.958333	0.794118	0.5625	0.881356	0.702381	0.327684	0.870968	0.773333	0.954545	0.9375	0.607143	0.791045	0.989474	0.721011	0.698525
19	0.96875	0.970588	1	1	0.882353	0.570312	0.881356	0.690476	0.293785	0.870968	0.76	0.954545	0.9375	0.571429	0.820896	0.989474	0.718396	0.696554
20	0.9375	0.970588	1	1	0.838235	0.578125	0.932203	0.654762	0.333333	0.935484	0.76	0.954545	0.96875	0.564286	0.835821	0.968421	0.721011	0.698364
21	0.927083	0.970588	1	1	0.794118	0.570312	0.932203	0.619048	0.282486	0.935484	0.813333	1	0.96875	0.592857	0.820896	0.968421	0.713165	0.690785
22	0.9375	1	1	1	0.823529	0.546875	0.983051	0.678571	0.344633	0.967742	0.813333	1	0.96875	0.635714	0.895522	0.978947	0.741935	0.72164
23	0.9375	1	1	0.958333	0.852941	0.65625	0.898305	0.654762	0.316384	0.870968	0.8	1	0.96875	0.571429	0.880597	0.978947	0.732345	0.711479
24	0.927083	1	1	1	0.852941	0.664062	0.932203	0.761905	0.384181	0.967742	0.826667	1	0.96875	0.692857	0.895522	0.989474	0.774194	0.756475
25	0.9375	1	1	1	0.838235	0.664062	0.847458	0.72619	0.412429	0.935484	0.733333	0.954545	0.9375	0.7	0.880597	1	0.763731	0.744527
26	0.916667	1	1	1	0.852941	0.664062	0.898305	0.738095	0.446328	0.903226	0.773333	1	0.96875	0.714286	0.850746	0.968421	0.77245	0.754054
27	0.9375	1	1	1	0.808824	0.664062	0.915254	0.77381	0.435028	0.935484	0.826667	0.954545	0.96875	0.714286	0.880597	0.978947	0.779425	0.762022
28	0.96875	0.970588	1	1	0.779412	0.6875	0.864407	0.809524	0.418079	0.967742	0.866667	1	1	0.685714	0.925373	0.989474	0.784656	0.768362
29	0.96875	1	1	1	0.823529	0.632812	0.932203	0.77381	0.429379	0.967742	0.813333	1	1	0.664286	0.895522	0.978947	0.775937	0.758294
30	0.9375	1	1	1	0.838235	0.640625	0.881356	0.77381	0.418079	0.967742	0.8	1	0.96875	0.671429	0.880597	0.989474	0.769834	0.752274
31	0.979167	1	1	1	0.823529	0.695312	0.932203	0.785714	0.423729	0.967742	0.813333	0.909091	1	0.692857	0.910448	0.978947	0.786399	0.770238
32	0.979167	1	1	1	0.882353	0.703125	0.830508	0.75	0.423729	0.935484	0.8	1	0.96875	0.657143	0.880597	0.978947	0.775937	0.758882
33	0.96875	1	1	1	0.882353	0.695312	0.898305	0.77381	0.418079	0.935484	0.853333	0.954545	0.96875	0.692857	0.910448	1	0.789015	0.773033
34	0.958333	1	1	1	0.808824	0.679688	0.915254	0.738095	0.435028	0.967742	0.826667	0.909091	0.96875	0.664286	0.865672	0.968421	0.77245	0.754548
35	0.96875	0.970588	1	1	0.838235	0.679688	0.881356	0.761905	0.435028	0.967742	0.84	1	0.96875	0.657143	0.895522	0.989474	0.779425	0.762894
36	0.958333	1	1	1	0.823529	0.679688	0.949153	0.845238	0.497175	0.935484	0.813333	1	1	0.707143	0.925373	0.989474	0.803836	0.788058
37	0.9375	1	1	1	0.838235	0.703125	0.915254	0.821429	0.485876	1	0.8	0.954545	1	0.657143	0.925373	0.989474	0.794246	0.777924
38	0.96875	1	1	1	0.823529	0.710938	0.966102	0.833333	0.474576	0.967742	0.826667	1	0.96875	0.728571	0.910448	0.989474	0.807323	0.792366
39	0.989583	1	1	1	0.882353	0.65625	0.915254	0.77381	0.497175	1	0.813333	0.954545	1	0.7	0.925373	0.978947	0.799477	0.783223
40	0.958333	1	1	1	0.823529	0.671875	0.949153	0.857143	0.502825	0.935484	0.813333	0.954545	0.96875	0.7	0.940299	0.978947	0.802092	0.786469
41	0.96875	1	1	1	0.911765	0.710938	0.898305	0.821429	0.491525	0.967742	0.813333	1	1	0.714286	0.895522	0.989474	0.808195	0.793284
42	0.958333	1	1	1	0.897059	0.679688	0.932203	0.821429	0.480226	0.967742	0.853333	1	1	0.685714	0.880597	0.968421	0.799477	0.783485
43	0.979167	1	1	1	0.882353	0.742188	0.949153	0.821429	0.502825	1	0.893333	1	0.96875	0.7	0.940299	0.978947	0.820401	0.806085
44	0.96875	1	1	1	0.838235	0.71875	0.949153	0.785714	0.502825	1	0.853333	1	1	0.714286	0.925373	0.978947	0.810811	0.795795
45	0.958333	1	1	1	0.852941	0.65625	0.932203	0.809524	0.508475	0.935484	0.813333	0.954545	1	0.721429	0.895522	0.968421	0.798605	0.782309
46	0.96875	1	1	1	0.867647	0.679688	0.949153	0.821429	0.502825	0.967742	0.853333	1	0.96875	0.65	0.880597	0.978947	0.798605	0.782038
47	0.9375	1	1	1	0.852941	0.703125	0.949153	0.809524	0.502825	0.967742	0.866667	1	1	0.7	0.925373	1	0.809067	0.793605
48	0.96875	1	1	1	0.867647	0.679688	0.966102	0.77381	0.491525	0.967742	0.8	1	1	0.714286	0.880597	0.989474	0.800349	0.784429
49	0.979167	1	1	1	0.867647	0.734375	0.949153	0.845238	0.502825	0.935484	0.84	1	1	0.707143	0.910448	1	0.816914	0.802344
50	0.958333	1	1	1	0.882353	0.71875	0.949153	0.821429	0.508475	0.935484	0.853333	1	1	0.735714	0.910448	0.978947	0.816042	0.801231
51	0.947917	1	1	1	0.911765	0.742188	0.966102	0.797619	0.531073	0.967742	0.88	0.954545	1	0.735714	0.940299	0.978947	0.825632	0.811178
52	0.96875	1	1	1	0.882353	0.71875	0.983051	0.869048	0.536723	0.935484	0.813333	1	1	0.728571	0.970149	1	0.828248	0.814235
53	0.947917	0.970588	1	1	0.838235	0.742188	0.949153	0.869048	0.559322	1	0.826667	1	1	0.721429	0.925373	1	0.826504	0.811922
54	0.979167	1	1	1	0.911765	0.648438	0.966102	0.761905	0.559322	1	0.826667	1	1	0.707143	0.985075	0.989474	0.817786	0.80266
55	0.96875	1	1	1	0.838235	0.71875	0.983051	0.892857	0.576271	1	0.866667	1	1	0.7	0.955224	0.989474	0.833479	0.819846
56	0.958333	1	1	1	0.867647	0.726562	0.983051	0.809524	0.548023	1	0.866667	1	0.96875	0.728571	0.880597	0.989474	0.823017	0.807982
57	0.947917	1	1	1	0.897059	0.71875	0.949153	0.845238	0.564972	0.935484	0.893333	1	1	0.7	0.940299	0.989474	0.827376	0.812694
58	0.96875	0.970588	1	1	0.823529	0.71875	0.949153	0.809524	0.536723	1	0.866667	1	1	0.742857	0.910448	0.989474	0.820401	0.80512
59	0.96875	1	1	1	0.867647	0.734375	0.983051	0.869048	0.548023	1	0.88	1	1	0.714286	0.940299	1	0.833479	0.819939
60	0.96875	1	1	1	0.867647	0.726562	0.966102	0.869048	0.553672	0.967742	0.813333	1	1	0.685714	0.940299	1	0.823888	0.809421
61	0.979167	1	1	1	0.852941	0.710938	0.983051	0.880952	0.559322	0.903226	0.893333	1	1	0.757143	0.925373	0.989474	0.835222	0.821703
62	0.958333	1	1	1	0.867647	0.742188	0.949153	0.857143	0.548023	1	0.88	1	1	0.721429	0.910448	0.989474	0.829119	0.815026
63	0.958333	1	1	1	0.838235	0.75	0.983051	0.880952	0.587571	1	0.906667	1	1	0.714286	0.925373	1	0.840453	0.82709
64	0.979167	1	1	1	0.808824	0.695312	0.983051	0.880952	0.576271	1	0.76	1	1	0.7	0.925373	1	0.821273	0.805961
65	0.979167	0.970588	1	1	0.882353	0.742188	0.983051	0.833333	0.60452	0.935484	0.866667	1	1	0.728571	0.955224	0.989474	0.840453	0.826831
66	0.979167	1	1	1	0.823529	0.695312	0.932203	0.892857	0.581921	1	0.84	1	1	0.714286	0.925373	0.989474	0.827376	0.812557
67	0.979167	1	1	1	0.897059	0.726562	1	0.880952	0.587571	1	0.826667	1	1	0.721429	0.955224	1	0.841325	0.82818
68	0.96875	0.970588	1	1	0.852941	0.773438	0.983051	0.916667	0.587571	1	0.826667	1	1	0.692857	0.880597	1	0.836094	0.822132
69	0.979167	1	1	1	0.911765	0.757812	0.966102	0.857143	0.581921	1	0.866667	1	1	0.728571	0.910448	1	0.842197	0.82902
70	0.979167	0.970588	1	1	0.852941	0.734375	0.983051	0.928571	0.576271	1	0.853333	0.954545	1	0.657143	0.895522	1	0.829119	0.814938
71	0.989583	1	1	1	0.794118	0.75	0.949153	0.904762	0.570621	1	0.84	1	1	0.75	0.955224	1	0.839582	0.826115
72	0.989583	1	1	1	0.882353	0.65625	0.966102	0.892857	0.564972	0.967742	0.826667	1	1	0.7	0.970149	1	0.826504	0.812092
73	0.96875	1	1	1	0.897059	0.71875	0.949153	0.880952	0.548023	0.967742	0.88	1	1	0.757143	0.940299	1	0.836966	0.823376
74	0.989583	1	1	1	0.926471	0.710938	0.966102	0.833333	0.548023	1	0.826667	1	1	0.735714	0.925373	1	0.830863	0.816841
75	0.989583	1	1	1	0.911765	0.695312	0.949153	0.892857	0.548023	1	0.866667	1	1	0.728571	0.910448	1	0.832607	0.818719
76	0.96875	1	1	1	0.882353	0.703125	0.949153	0.916667	0.553672	1	0.813333	1	1	0.742857	0.895522	1	0.829991	0.815523
77	0.989583	1	1	1	0.897059	0.734375	0.949153	0.869048	0.542373	0.935484	0.813333	1	1	0.728571	0.940299	1	0.829991	0.815785
78	0.96875	1	1	1	0.882353	0.75	0.949153	0.880952	0.553672	1	0.813333	1	1	0.735714	0.955224	1	0.835222	0.821451
79	0.979167	1	1	1	0.852941	0.703125	0.966102	0.821429	0.548023	1	0.906667	1	1	0.742857	0.940299	1	0.830863	0.816547
80	0.979167	1	1	1	0.911765	0.742188	0.932203	0.904762	0.564972	1	0.853333	1	1	0.721429	0.940299	1	0.839582	0.826375
81	0.989583	1	1	1	0.897059	0.734375	0.949153	0.869048	0.559322	1	0.84	1	1	0.7	0.925373	1	0.831735	0.817509
82	0.96875	1	1	1	0.838235	0.664062	0.983051	0.869048	0.553672	0.903226	0.813333	0.954545	1	0.721429	0.940299	1	0.817786	0.802408
83	0.989583	1	1	0.958333	0.911765	0.695312	1	0.857143	0.559322	1	0.84	1	1	0.707143	0.940299	1	0.830863	0.81672
84	0.979167	1	1	1	0.852941	0.703125	0.966102	0.880952	0.553672	0.967742	0.853333	1	1	0.692857	0.970149	1	0.827376	0.81292
85	0.96875	1	1	1	0.852941	0.75	1	0.869048	0.536723	0.935484	0.853333	1	1	0.721429	1	1	0.83435	0.820766
86	0.989583	1	1	1	0.867647	0.6875	0.932203	0.880952	0.542373	0.935484	0.866667	1	0.9375	0.728571	0.955224	1	0.825632	0.811289
87	0.989583	1	1	1	0.926471	0.695312	0.966102	0.892857	0.553672	0.967742	0.853333	1	1	0.721429	0.955224	1	0.835222	0.821333
88	0.989583	1	1	1	0.852941	0.703125	0.949153	0.869048	0.553672	0.967742	0.893333	1	1	0.735714	0.955224	1	0.833479	0.819967
89	0.958333	1	1	1	0.867647	0.671875	0.983051	0.845238	0.559322	0.935484	0.826667	1	1	0.742857	0.970149	1	0.825632	0.810894
90	0.979167	1	1	1	0.882353	0.75	0.983051	0.892857	0.548023	0.967742	0.88	1	1	0.757143	0.970149	1	0.844813	0.832214
91	0.989583	1	1	0.958333	0.882353	0.734375	0.983051	0.857143	0.559322	0.967742	0.866667	1	0.96875	0.75	0.925373	1	0.836966	0.823506
92	0.989583	1	1	1	0.897059	0.71875	0.966102	0.880952	0.564972	0.967742	0.853333	1	1	0.757143	0.955224	1	0.841325	0.828447
93	0.96875	1	1	1	0.852941	0.71875	0.983051	0.880952	0.553672	1	0.853333	1	1	0.742857	0.955224	1	0.835222	0.821697
94	0.989583	1	1	1	0.882353	0.71875	0.915254	0.845238	0.559322	0.967742	0.8	1	1	0.7	0.955224	1	0.823888	0.80928
95	0.979167	1	1	1	0.882353	0.679688	0.949153	0.916667	0.559322	1	0.84	1	1	0.714286	0.925373	1	0.829119	0.814759
96	0.947917	1	1	1	0.897059	0.71875	0.949153	0.880952	0.570621	1	0.893333	1	1	0.685714	0.970149	1	0.833479	0.819399
97	0.979167	1	1	1	0.926471	0.710938	0.932203	0.869048	0.581921	1	0.84	1	1	0.728571	0.955224	1	0.837838	0.824237
98	1	0.970588	1	1	0.882353	0.75	1	0.904762	0.559322	0.967742	0.853333	1	1	0.721429	0.940299	1	0.841325	0.828329
99	0.979167	1	1	1	0.897059	0.765625	0.983051	0.869048	0.581921	0.967742	0.92	1	1	0.742857	0.940299	1	0.850044	0.837558
100	0.989583	1	1	1	0.926471	0.757812	0.949153	0.880952	0.559322	0.935484	0.8	1	1	0.728571	0.955224	1	0.837838	0.82415
101	0.958333	1	1	1	0.867647	0.703125	0.949153	0.928571	0.570621	0.903226	0.8	1	1	0.764286	0.955224	1	0.83435	0.820381
102	0.96875	1	1	1	0.852941	0.734375	0.966102	0.857143	0.570621	0.967742	0.88	1	1	0.735714	0.940299	1	0.836094	0.82218
103	1	1	1	1	0.882353	0.71875	0.966102	0.928571	0.581921	1	0.88	1	1	0.721429	0.955224	1	0.845684	0.832528
104	0.958333	1	1	1	0.867647	0.6875	0.983051	0.916667	0.689266	1	0.853333	1	1	0.857143	0.955224	1	0.869224	0.85771
105	0.958333	1	1	1	0.852941	0.765625	0.983051	0.845238	0.677966	1	0.88	1	1	0.878571	0.940299	1	0.873583	0.862463
106	0.979167	1	1	1	0.838235	0.6875	0.949153	0.880952	0.683616	0.967742	0.893333	0.954545	0.96875	0.842857	1	1	0.864865	0.853152
107	0.979167	1	1	1	0.897059	0.734375	0.966102	0.892857	0.683616	0.935484	0.853333	1	1	0.828571	0.985075	1	0.870968	0.85973
108	1	1	1	1	0.911765	0.742188	0.949153	0.880952	0.689266	1	0.826667	1	1	0.85	0.955224	1	0.874455	0.863635
109	0.96875	1	1	1	0.911765	0.71875	0.966102	0.940476	0.694915	0.967742	0.866667	1	1	0.857143	0.940299	1	0.877071	0.866308
110	0.979167	1	1	1	0.882353	0.679688	1	0.928571	0.677966	0.935484	0.893333	1	1	0.835714	0.925373	1	0.86748	0.855977
111	0.947917	1	1	1	0.897059	0.78125	0.983051	0.880952	0.706215	1	0.813333	1	1	0.892857	0.955224	1	0.882302	0.871875
112	0.989583	1	1	1	0.867647	0.726562	0.915254	0.880952	0.689266	1	0.866667	1	1	0.835714	0.955224	1	0.868352	0.856762
113	0.979167	1	1	1	0.941176	0.710938	0.966102	0.904762	0.706215	0.967742	0.786667	1	1	0.835714	0.925373	1	0.869224	0.857791
114	1	1	1	1	0.852941	0.710938	0.949153	0.869048	0.706215	1	0.88	1	1	0.885714	0.955224	1	0.877071	0.866175
115	0.947917	1	1	1	0.867647	0.734375	0.949153	0.928571	0.689266	0.967742	0.866667	0.954545	1	0.885714	0.925373	1	0.873583	0.862348
116	0.958333	1	1	1	0.941176	0.773438	0.966102	0.928571	0.689266	0.967742	0.813333	1	1	0.857143	0.895522	1	0.876199	0.865283
117	0.96875	1	1	1	0.867647	0.742188	0.966102	0.916667	0.683616	0.903226	0.813333	1	1	0.864286	0.940299	1	0.869224	0.857728
118	0.958333	1	1	1	0.911765	0.75	0.966102	0.880952	0.666667	0.967742	0.853333	1	1	0.857143	0.940299	1	0.870096	0.858872
119	0.979167	1	1	1	0.911765	0.75	1	0.892857	0.689266	1	0.813333	1	1	0.892857	0.940299	1	0.880558	0.870029
120	0.958333	1	1	1	0.838235	0.78125	0.966102	0.952381	0.683616	0.967742	0.853333	1	1	0.821429	0.925373	1	0.87184	0.860663
121	0.979167	1	1	1	0.838235	0.726562	0.983051	0.904762	0.683616	1	0.866667	1	1	0.864286	0.955224	1	0.873583	0.862608
122	0.979167	1	1	1	0.882353	0.796875	0.932203	0.904762	0.706215	0.967742	0.893333	1	1	0.821429	0.940299	1	0.879686	0.868931
123	0.958333	1	1	1	0.808824	0.757812	0.983051	0.892857	0.706215	1	0.906667	1	1	0.878571	0.940299	1	0.879686	0.86904
124	0.979167	1	1	1	0.897059	0.71875	0.966102	0.928571	0.694915	1	0.84	1	1	0.85	0.955224	1	0.875327	0.864439
125	0.979167	1	1	1	0.897059	0.75	0.983051	0.892857	0.706215	1	0.813333	1	1	0.842857	0.940299	1	0.875327	0.864267
126	0.979167	1	1	1	0.867647	0.75	0.966102	0.857143	0.700565	0.967742	0.906667	0.954545	1	0.857143	0.940299	1	0.875327	0.864319
127	0.947917	1	1	1	0.911765	0.765625	0.966102	0.892857	0.694915	0.967742	0.826667	1	1	0.871429	0.970149	1	0.877942	0.867129
128	0.989583	1	1	1	0.867647	0.710938	0.983051	0.857143	0.700565	1	0.826667	1	1	0.85	0.925373	1	0.86748	0.855899
129	0.979167	1	1	1	0.823529	0.734375	0.966102	0.952381	0.689266	0.967742	0.92	1	1	0.864286	0.985075	1	0.88143	0.871194
130	0.979167	1	1	1	0.882353	0.734375	0.983051	0.916667	0.700565	1	0.866667	1	1	0.842857	0.985075	1	0.879686	0.869301
131	0.96875	1	1	1	0.897059	0.765625	0.915254	0.928571	0.694915	0.967742	0.866667	1	1	0.871429	0.925373	1	0.878814	0.868027
132	0.9375	1	1	1	0.808824	0.773438	1	0.916667	0.734463	0.967742	0.88	1	1	0.871429	0.955224	1	0.884045	0.873671
133	0.989583	1	1	1	0.852941	0.726562	0.983051	0.928571	0.700565	0.967742	0.84	1	1	0.85	0.985075	1	0.877071	0.866174
134	0.979167	1	1	1	0.897059	0.75	0.966102	0.916667	0.745763	0.935484	0.853333	1	1	0.864286	0.955224	1	0.886661	0.876476
135	0.979167	1	1	1	0.897059	0.71875	0.966102	0.892857	0.723164	1	0.893333	1	1	0.857143	0.955224	1	0.88143	0.87089
136	0.947917	1	1	1	0.897059	0.726562	0.949153	0.904762	0.723164	1	0.853333	0.954545	1	0.828571	0.955224	1	0.872711	0.861309
137	0.958333	1	1	1	0.897059	0.773438	0.966102	0.940476	0.751412	1	0.826667	1	1	0.871429	0.970149	1	0.891892	0.882239
138	0.96875	1	1	1	0.867647	0.75	0.983051	0.916667	0.745763	0.935484	0.84	1	1	0.864286	0.955224	1	0.884045	0.873636
139	0.958333	1	1	1	0.897059	0.75	0.966102	0.928571	0.728814	0.967742	0.92	1	1	0.842857	0.970149	1	0.886661	0.876446
140	0.989583	1	1	1	0.897059	0.765625	0.966102	0.916667	0.717514	1	0.893333	1	1	0.85	0.985075	1	0.889276	0.879564
141	0.979167	1	1	1	0.882353	0.757812	0.932203	0.940476	0.717514	1	0.826667	1	1	0.828571	0.955224	1	0.877942	0.867252
142	0.96875	1	1	1	0.926471	0.796875	0.949153	0.857143	0.757062	0.967742	0.866667	1	0.96875	0.842857	0.955224	1	0.887533	0.877457
143	0.979167	1	1	1	0.882353	0.757812	0.966102	0.916667	0.734463	1	0.866667	1	1	0.842857	0.970149	1	0.885789	0.875583
144	0.979167	1	1	1	0.897059	0.734375	0.966102	0.928571	0.745763	0.935484	0.893333	1	1	0.814286	0.970149	1	0.883173	0.872769
145	0.96875	1	1	1	0.926471	0.710938	1	0.916667	0.723164	0.967742	0.84	1	1	0.842857	0.955224	1	0.878814	0.868191
146	0.979167	1	1	1	0.882353	0.757812	0.915254	0.940476	0.740113	1	0.826667	1	1	0.835714	0.940299	1	0.880558	0.869831
147	0.979167	1	1	1	0.882353	0.796875	0.966102	0.880952	0.734463	0.967742	0.866667	1	1	0.857143	1	1	0.890148	0.880376
148	0.989583	1	1	1	0.823529	0.773438	0.983051	0.916667	0.740113	0.935484	0.906667	1	1	0.864286	0.955224	1	0.889276	0.879342
149	0.96875	1	1	1	0.941176	0.789062	1	0.928571	0.751412	1	0.84	1	1	0.807143	1	1	0.892764	0.883306
150	0.96875	1	1	1	0.911765	0.757812	0.915254	0.940476	0.751412	0.967742	0.893333	0.954545	1	0.842857	0.970149	1	0.888405	0.878426
151	0.979167	1	1	1	0.897059	0.757812	0.966102	0.940476	0.728814	1	0.84	1	1	0.878571	0.940299	1	0.888405	0.878345
152	0.979167	1	1	1	0.911765	0.804688	0.983051	0.904762	0.740113	1	0.88	1	1	0.842857	0.940299	1	0.892764	0.883311
153	0.979167	1	1	1	0.897059	0.757812	0.966102	0.916667	0.734463	1	0.88	1	1	0.821429	0.970149	1	0.884917	0.874652
154	0.96875	1	1	1	0.838235	0.757812	0.966102	0.880952	0.734463	1	0.88	1	1	0.885714	0.970149	1	0.885789	0.875638
155	0.989583	1	1	1	0.882353	0.734375	1	0.940476	0.740113	1	0.893333	1	1	0.85	0.985075	1	0.891892	0.882242
156	0.979167	1	1	1	0.867647	0.734375	0.966102	0.904762	0.728814	1	0.893333	1	1	0.842857	0.955224	1	0.88143	0.87092
157	0.96875	1	1	1	0.882353	0.742188	0.983051	0.940476	0.779661	0.967742	0.826667	1	1	0.857143	0.955224	1	0.890148	0.880337
158	0.979167	1	1	1	0.882353	0.796875	0.966102	0.916667	0.751412	0.967742	0.88	0.954545	1	0.85	0.985075	1	0.893636	0.884198
159	0.979167	1	1	1	0.823529	0.78125	0.983051	0.928571	0.734463	0.967742	0.88	0.954545	1	0.842857	0.955224	1	0.884917	0.874676
160	0.979167	1	1	1	0.897059	0.804688	0.983051	0.97619	0.751412	1	0.84	1	1	0.814286	0.955224	1	0.893636	0.884326
161	0.96875	1	1	1	0.867647	0.78125	0.966102	0.940476	0.740113	1	0.84	1	1	0.807143	0.940299	1	0.88143	0.870977
162	0.979167	0.970588	1	1	0.852941	0.742188	0.983051	0.928571	0.751412	1	0.893333	1	1	0.857143	0.955224	1	0.888405	0.878477
163	0.989583	1	1	1	0.911765	0.742188	0.983051	0.964286	0.757062	1	0.866667	1	1	0.857143	0.955224	1	0.895379	0.886288
164	0.979167	1	1	1	0.882353	0.773438	0.949153	0.940476	0.762712	0.967742	0.866667	1	1	0.878571	0.955224	1	0.895379	0.885929
165	0.979167	1	1	1	0.838235	0.78125	0.966102	0.916667	0.723164	1	0.893333	1	1	0.842857	0.970149	1	0.885789	0.875603
166	0.96875	1	1	1	0.867647	0.789062	1	0.904762	0.711864	1	0.88	1	1	0.835714	0.985075	1	0.885789	0.875954
167	0.979167	1	1	1	0.970588	0.765625	1	0.916667	0.723164	0.967742	0.88	1	1	0.85	0.985075	1	0.893636	0.884342
168	0.958333	1	1	1	0.867647	0.789062	1	0.940476	0.734463	1	0.853333	1	1	0.857143	0.940299	1	0.889276	0.879438
169	0.96875	1	1	1	0.897059	0.757812	0.966102	0.892857	0.745763	0.967742	0.88	1	1	0.85	0.970149	1	0.886661	0.876504
170	0.989583	1	1	1	0.926471	0.726562	0.949153	0.940476	0.757062	1	0.853333	1	1	0.85	0.985075	1	0.89102	0.881302
171	1	1	1	1	0.867647	0.789062	1	0.928571	0.728814	1	0.933333	1	1	0.857143	0.985075	1	0.898867	0.889943
172	0.979167	1	1	1	0.897059	0.78125	1	0.97619	0.751412	0.967742	0.853333	1	1	0.835714	0.955224	1	0.894507	0.885281
173	1	1	1	1	0.897059	0.804688	0.966102	0.952381	0.745763	0.967742	0.88	1	1	0.835714	0.985075	1	0.897995	0.88905
174	0.958333	1	1	1	0.852941	0.820312	0.983051	0.940476	0.751412	0.967742	0.853333	1	1	0.871429	0.970149	1	0.896251	0.886962
175	0.979167	1	1	1	0.897059	0.789062	0.966102	0.964286	0.734463	1	0.826667	1	1	0.864286	1	1	0.895379	0.886111
176	0.96875	1	1	1	0.852941	0.796875	0.949153	0.928571	0.751412	0.967742	0.933333	1	1	0.842857	0.985075	1	0.894507	0.885123
177	0.9375	1	1	1	0.867647	0.804688	0.983051	0.916667	0.745763	1	0.853333	1	1	0.85	0.970149	1	0.889276	0.879376
178	0.947917	1	1	1	0.897059	0.796875	0.949153	0.904762	0.728814	1	0.893333	1	1	0.878571	0.970149	1	0.891892	0.882112
179	0.989583	1	1	1	0.897059	0.789062	0.966102	0.916667	0.740113	1	0.88	1	1	0.864286	0.940299	1	0.893636	0.884158
180	0.979167	1	1	1	0.911765	0.78125	1	0.928571	0.745763	1	0.853333	1	1	0.85	0.970149	1	0.894507	0.885134
181	0.989583	1	1	1	0.911765	0.804688	0.915254	0.952381	0.751412	1	0.853333	0.909091	1	0.878571	0.970149	1	0.897995	0.888866
182	0.96875	1	1	1	0.970588	0.789062	0.983051	0.928571	0.740113	1	0.906667	1	1	0.85	0.955224	1	0.898867	0.889838
183	0.96875	1	1	1	0.911765	0.828125	1	0.97619	0.740113	1	0.866667	1	1	0.857143	0.985075	1	0.904098	0.895666
184	0.979167	1	1	1	0.897059	0.78125	0.949153	0.916667	0.762712	0.967742	0.826667	1	1	0.871429	0.985075	1	0.893636	0.883965
185	0.958333	1	1	1	0.941176	0.773438	1	0.952381	0.757062	1	0.906667	1	1	0.85	0.985075	1	0.901482	0.892827
186	0.958333	1	1	1	0.926471	0.789062	1	0.952381	0.757062	0.935484	0.88	0.954545	1	0.885714	0.985075	1	0.902354	0.893752
187	0.958333	1	1	1	0.955882	0.757812	0.983051	0.916667	0.751412	1	0.866667	1	1	0.885714	0.955224	1	0.896251	0.886931
188	0.96875	1	1	1	0.941176	0.796875	0.983051	0.940476	0.740113	1	0.84	1	1	0.878571	0.970149	1	0.898867	0.890012
189	0.96875	1	1	1	0.882353	0.796875	0.966102	0.928571	0.734463	1	0.84	1	1	0.878571	0.970149	1	0.892764	0.883234
190	0.979167	1	1	1	0.955882	0.804688	0.966102	0.952381	0.762712	1	0.933333	0.954545	1	0.871429	0.970149	1	0.909329	0.901225
191	0.989583	1	1	1	0.926471	0.773438	1	0.952381	0.740113	1	0.853333	1	1	0.871429	0.970149	1	0.898867	0.890017
192	0.947917	1	1	1	0.926471	0.796875	0.966102	0.964286	0.751412	1	0.853333	0.954545	1	0.892857	0.985075	1	0.901482	0.892557
193	0.989583	1	1	1	0.882353	0.828125	0.966102	0.940476	0.745763	1	0.906667	1	1	0.864286	0.970149	1	0.903226	0.894674
194	0.96875	1	1	1	0.955882	0.8125	0.983051	0.928571	0.745763	0.967742	0.826667	1	1	0.864286	0.955224	1	0.897123	0.888034
195	0.979167	1	1	1	0.941176	0.742188	0.983051	0.916667	0.745763	0.967742	0.893333	1	1	0.85	0.955224	1	0.89102	0.881401
196	0.979167	1	1	1	0.911765	0.796875	0.949153	0.97619	0.757062	1	0.84	0.954545	1	0.857143	0.970149	1	0.897995	0.888905
197	1	1	1	1	0.897059	0.804688	0.966102	0.880952	0.745763	1	0.88	1	1	0.857143	0.985075	1	0.896251	0.887101
198	0.958333	1	1	1	0.911765	0.8125	0.966102	0.928571	0.740113	1	0.88	1	1	0.871429	0.955224	1	0.897123	0.888067
199	0.9375	1	1	1	0.882353	0.789062	0.983051	0.964286	0.768362	1	0.906667	1	1	0.9	0.970149	1	0.904969	0.896385
200	0.958333	1	1	1	0.882353	0.78125	0.966102	0.964286	0.740113	1	0.92	1	1	0.864286	0.970149	1	0.897123	0.887991
201	0.947917	1	1	1	0.882353	0.789062	1	0.952381	0.751412	1	0.893333	1	1	0.871429	1	1	0.90061	0.891765
202	0.947917	1	1	1	0.882353	0.757812	1	0.952381	0.745763	0.967742	0.866667	1	1	0.878571	0.985075	1	0.893636	0.88416
203	0.96875	1	1	1	0.911765	0.796875	0.983051	0.916667	0.762712	1	0.893333	0.954545	1	0.842857	0.970149	1	0.897123	0.887977
204	0.96875	1	1	1	0.867647	0.835938	0.983051	0.904762	0.745763	1	0.933333	1	1	0.878571	0.985075	1	0.904098	0.895504
205	0.947917	1	1	1	0.955882	0.75	1	0.964286	0.757062	1	0.92	1	1	0.857143	0.985075	1	0.901482	0.892816
206	0.989583	1	1	1	0.911765	0.796875	0.983051	0.952381	0.751412	1	0.84	1	1	0.885714	0.955224	1	0.901482	0.892687
207	0.96875	1	1	1	0.897059	0.789062	0.966102	0.916667	0.757062	1	0.88	1	1	0.878571	0.985075	1	0.898867	0.889869
208	0.989583	1	1	1	0.941176	0.789062	0.932203	0.928571	0.745763	1	0.853333	1	1	0.885714	0.955224	1	0.897995	0.888868
209	0.979167	1	1	1	0.941176	0.789062	0.949153	0.940476	0.740113	0.967742	0.866667	1	1	0.857143	0.985075	1	0.896251	0.886976
210	1	1	1	1	0.897059	0.796875	0.983051	0.880952	0.768362	1	0.906667	1	1	0.864286	0.985075	1	0.902354	0.893626
211	1	1	1	1	0.882353	0.796875	0.966102	0.940476	0.785311	0.967742	0.933333	1	1	0.842857	0.985075	1	0.905841	0.897379
212	0.989583	1	1	1	0.911765	0.78125	0.949153	0.928571	0.785311	0.935484	0.84	1	1	0.9	0.955224	1	0.901482	0.892485
213	0.989583	1	1	1	0.882353	0.804688	0.983051	0.964286	0.785311	1	0.92	0.954545	1	0.85	0.985075	1	0.908457	0.900116
214	0.96875	1	1	1	0.926471	0.773438	0.949153	0.904762	0.785311	1	0.893333	1	1	0.857143	0.985075	1	0.899738	0.89055
215	0.989583	1	1	1	0.852941	0.765625	0.915254	0.940476	0.79661	1	0.88	1	1	0.835714	0.970149	1	0.894507	0.884896
216	0.96875	1	1	1	0.867647	0.804688	0.983051	0.904762	0.785311	0.967742	0.866667	1	1	0.835714	0.970149	1	0.895379	0.885925
217	0.958333	1	1	1	0.955882	0.773438	0.983051	0.964286	0.785311	1	0.853333	1	1	0.871429	0.970149	1	0.904969	0.896334
218	0.958333	1	1	1	0.897059	0.789062	0.966102	0.928571	0.774011	1	0.853333	1	1	0.864286	0.985075	1	0.897995	0.888682
219	0.979167	1	1	1	0.955882	0.820312	0.983051	0.940476	0.774011	0.967742	0.92	1	1	0.864286	0.970149	1	0.911072	0.903058
220	0.9375	1	1	1	0.911765	0.75	0.949153	0.928571	0.79661	1	0.92	1	1	0.85	0.985075	1	0.897995	0.888553
221	0.96875	1	1	1	0.897059	0.804688	0.966102	0.952381	0.785311	1	0.88	1	1	0.857143	1	1	0.905841	0.897321
222	1	1	1	1	0.941176	0.773438	1	0.928571	0.80226	1	0.92	1	1	0.842857	0.985075	1	0.910201	0.90209
223	0.979167	1	1	1	0.941176	0.773438	0.966102	0.952381	0.79096	1	0.84	1	1	0.814286	1	1	0.898867	0.889843
224	0.96875	1	1	1	0.926471	0.796875	0.983051	0.952381	0.79096	0.967742	0.906667	1	1	0.857143	0.940299	1	0.905841	0.897211
225	0.96875	1	1	1	0.955882	0.765625	0.966102	0.940476	0.80791	1	0.92	1	1	0.842857	0.985075	1	0.907585	0.899225
226	0.979167	1	1	1	0.955882	0.8125	0.983051	0.940476	0.779661	0.967742	0.84	1	1	0.857143	0.955224	1	0.904098	0.89533
227	0.96875	1	1	1	0.911765	0.804688	0.966102	0.940476	0.79661	1	0.84	1	1	0.878571	0.985075	1	0.906713	0.898087
228	0.96875	1	1	1	0.897059	0.804688	0.966102	0.940476	0.813559	1	0.933333	1	1	0.857143	1	1	0.912816	0.90479
229	0.979167	1	1	1	0.941176	0.828125	0.983051	0.928571	0.79096	1	0.92	1	1	0.864286	0.985075	1	0.91456	0.906873
230	0.989583	1	1	1	0.911765	0.789062	0.949153	0.940476	0.79096	0.967742	0.946667	1	1	0.864286	0.970149	1	0.908457	0.900149
231	0.96875	1	1	1	0.838235	0.796875	0.966102	0.97619	0.819209	1	0.88	1	1	0.85	0.955224	1	0.904969	0.896286
232	0.989583	1	1	1	0.911765	0.796875	1	0.940476	0.80791	0.967742	0.893333	1	1	0.835714	1	1	0.909329	0.901127
233	0.979167	1	1	1	0.852941	0.78125	0.966102	0.940476	0.779661	0.967742	0.88	1	1	0.871429	0.955224	1	0.897995	0.888725
234	0.958333	1	1	1	0.882353	0.726562	1	0.952381	0.779661	1	0.88	1	1	0.835714	0.970149	1	0.891892	0.881981
235	0.989583	1	1	1	0.897059	0.789062	1	0.940476	0.785311	1	0.88	1	1	0.878571	0.985075	1	0.908457	0.900195
236	0.979167	1	1	1	0.882353	0.78125	1	0.952381	0.79096	1	0.92	1	1	0.842857	0.970149	1	0.904969	0.896326
237	0.947917	1	1	1	0.897059	0.75	1	0.940476	0.785311	0.935484	0.906667	1	1	0.885714	1	1	0.902354	0.893399
238	1	1	1	1	0.941176	0.796875	0.983051	0.928571	0.79096	1	0.84	1	1	0.85	0.970149	1	0.904969	0.896395
239	0.958333	1	1	1	0.941176	0.796875	0.966102	0.964286	0.79096	1	0.906667	1	1	0.871429	0.940299	1	0.908457	0.900062
240	0.947917	1	1	1	0.838235	0.742188	0.966102	0.928571	0.785311	0.967742	0.88	1	1	0.835714	0.985075	1	0.887533	0.877191
241	0.979167	1	1	0.958333	0.926471	0.796875	0.966102	0.97619	0.80226	0.967742	0.88	1	1	0.85	0.940299	1	0.905841	0.897363
242	0.989583	1	1	1	0.911765	0.773438	0.966102	0.904762	0.79096	1	0.946667	1	1	0.85	0.955224	1	0.903226	0.894413
243	0.979167	1	1	1	0.867647	0.78125	0.983051	0.916667	0.79661	1	0.88	1	1	0.85	0.970149	1	0.899738	0.890515
244	0.96875	1	1	1	0.897059	0.742188	0.966102	0.904762	0.79096	1	0.933333	1	1	0.85	0.970149	1	0.897123	0.887732
245	0.947917	1	1	1	0.955882	0.757812	0.983051	0.940476	0.785311	1	0.92	1	1	0.842857	0.955224	1	0.90061	0.891612
246	0.979167	1	1	1	0.926471	0.703125	0.983051	0.940476	0.79096	0.967742	0.906667	1	1	0.842857	0.985075	1	0.896251	0.886864
247	0.989583	1	1	1	0.955882	0.835938	0.966102	0.940476	0.80226	1	0.88	1	1	0.85	0.985075	1	0.91456	0.906896
248	0.947917	1	1	1	0.911765	0.757812	0.966102	0.940476	0.79661	0.967742	0.866667	0.954545	1	0.878571	0.955224	1	0.897995	0.888496
249	0.979167	1	1	1	0.926471	0.765625	0.966102	0.928571	0.79661	1	0.893333	1	1	0.864286	0.985075	1	0.904969	0.896294
250	0.96875	1	1	1	0.911765	0.796875	0.966102	0.952381	0.80226	1	0.853333	1	1	0.835714	0.985075	1	0.903226	0.894277
251	0.947917	1	1	1	0.941176	0.796875	0.949153	0.928571	0.80791	1	0.84	1	1	0.857143	0.955224	1	0.901482	0.892441
252	0.989583	1	1	1	0.941176	0.820312	0.983051	0.928571	0.79096	1	0.88	1	1	0.857143	0.955224	1	0.909329	0.901179
253	0.989583	1	1	1	0.926471	0.789062	0.983051	0.964286	0.79096	1	0.866667	1	1	0.871429	0.970149	1	0.909329	0.901102
254	0.979167	1	1	1	0.882353	0.78125	0.966102	0.928571	0.79661	1	0.906667	1	1	0.857143	0.955224	1	0.902354	0.89343
255	0.958333	1	1	1	0.941176	0.773438	1	0.892857	0.779661	0.967742	0.92	1	1	0.821429	0.940299	1	0.894507	0.884928
256	0.958333	1	1	1	0.911765	0.78125	0.983051	0.916667	0.785311	1	0.893333	1	1	0.85	0.985075	1	0.90061	0.891578
257	0.96875	1	1	1	0.911765	0.773438	0.966102	0.916667	0.79661	1	0.893333	1	1	0.864286	0.970149	1	0.902354	0.893326
258	0.979167	1	1	1	0.970588	0.789062	0.983051	0.952381	0.79661	1	0.906667	1	1	0.842857	0.985075	1	0.911072	0.903002
259	0.947917	1	1	1	0.882353	0.742188	0.966102	0.952381	0.79661	1	0.906667	0.954545	1	0.85	0.985075	1	0.897123	0.887751
260	0.979167	1	1	1	0.926471	0.757812	0.966102	0.952381	0.80791	1	0.933333	1	1	0.878571	0.955224	1	0.910201	0.901893
261	0.96875	1	1	1	0.897059	0.789062	0.949153	0.952381	0.79661	1	0.906667	1	1	0.857143	0.985075	1	0.905841	0.897334
262	0.958333	1	1	1	0.867647	0.796875	1	0.928571	0.79661	1	0.893333	1	1	0.864286	0.970149	1	0.904098	0.895241
263	0.947917	1	1	1	0.911765	0.75	0.983051	0.928571	0.80226	1	0.906667	1	1	0.857143	0.970149	1	0.90061	0.891434
264	0.979167	1	1	1	0.897059	0.75	0.966102	0.964286	0.80226	1	0.92	1	1	0.828571	0.970149	1	0.901482	0.892544
265	0.96875	1	1	1	0.926471	0.78125	0.966102	0.964286	0.79096	1	0.853333	1	1	0.85	1	1	0.904098	0.895494
266	0.96875	1	1	1	0.911765	0.757812	1	0.964286	0.79661	1	0.866667	1	1	0.885714	0.940299	1	0.904969	0.896166
267	0.979167	1	1	1	0.911765	0.78125	0.983051	0.916667	0.785311	1	0.933333	1	1	0.857143	0.970149	1	0.904969	0.896375
268	0.958333	1	1	1	0.926471	0.78125	0.983051	0.940476	0.79661	0.935484	0.92	1	1	0.857143	0.985075	1	0.905841	0.897131
269	0.96875	1	1	1	0.970588	0.78125	0.966102	0.916667	0.80226	1	0.946667	1	1	0.864286	0.955224	1	0.910201	0.901895
270	0.979167	1	1	1	0.852941	0.765625	0.966102	0.928571	0.80226	1	0.92	1	1	0.828571	0.985075	1	0.898867	0.889731
271	0.958333	1	1	1	0.926471	0.75	0.966102	0.964286	0.79096	1	0.893333	1	1	0.835714	0.985075	1	0.899738	0.89066
272	0.958333	1	1	1	0.897059	0.789062	0.915254	0.952381	0.79096	0.967742	0.906667	1	1	0.864286	0.985075	1	0.902354	0.893336
273	0.96875	1	1	1	0.955882	0.742188	0.966102	0.940476	0.80226	1	0.853333	1	1	0.828571	0.985075	1	0.897995	0.888797
274	0.96875	1	1	1	0.926471	0.75	1	0.964286	0.785311	1	0.88	1	1	0.857143	1	1	0.904098	0.895464
275	0.96875	1	1	1	0.897059	0.828125	0.966102	0.940476	0.79096	1	0.88	0.954545	1	0.857143	1	1	0.907585	0.899164
276	0.947917	1	1	1	0.897059	0.84375	0.983051	0.952381	0.79096	1	0.893333	1	1	0.85	0.955224	1	0.907585	0.899138
277	0.979167	1	1	1	0.897059	0.8125	1	0.892857	0.785311	1	0.906667	1	1	0.871429	0.970149	1	0.906713	0.898213
278	0.947917	1	1	1	0.941176	0.765625	0.966102	0.904762	0.79661	0.967742	0.893333	1	1	0.878571	0.970149	1	0.901482	0.892307
279	0.958333	1	1	1	0.838235	0.742188	1	0.940476	0.80226	0.967742	0.906667	1	1	0.85	0.970149	1	0.896251	0.886722
280	0.96875	1	1	1	0.926471	0.796875	0.983051	0.916667	0.79661	1	0.866667	1	1	0.871429	0.985075	1	0.906713	0.898021
281	0.9375	1	1	1	0.867647	0.757812	0.983051	0.916667	0.80226	1	0.946667	1	1	0.85	0.985075	1	0.899738	0.890513
282	0.96875	1	1	1	0.897059	0.8125	0.983051	0.940476	0.79661	1	0.88	1	1	0.885714	0.970149	1	0.910201	0.901908
283	0.96875	1	1	1	0.852941	0.789062	1	0.952381	0.80791	1	0.893333	1	1	0.85	0.970149	1	0.904969	0.896207
284	0.989583	1	1	1	0.867647	0.773438	0.983051	0.928571	0.79096	0.967742	0.906667	1	1	0.864286	0.970149	1	0.902354	0.893447
285	0.979167	1	1	1	0.867647	0.804688	0.966102	0.892857	0.779661	1	0.92	1	1	0.864286	1	1	0.903226	0.894386
286	0.979167	1	1	1	0.867647	0.789062	0.966102	0.916667	0.79096	0.967742	0.893333	1	1	0.864286	0.940299	1	0.898867	0.889486
287	0.958333	1	1	1	0.911765	0.8125	0.932203	0.892857	0.785311	1	0.84	1	1	0.885714	0.970149	1	0.899738	0.890491
288	0.96875	1	1	1	0.867647	0.828125	1	0.916667	0.768362	1	0.88	1	1	0.878571	0.985075	1	0.904969	0.896424
289	0.96875	1	1	1	0.897059	0.789062	0.983051	0.928571	0.774011	1	0.893333	1	1	0.892857	0.985075	1	0.905841	0.897148
290	0.989583	1	1	1	0.926471	0.773438	0.949153	0.940476	0.79661	1	0.893333	1	1	0.9	0.985075	1	0.911072	0.902822
291	0.958333	1	1	1	0.941176	0.789062	1	0.952381	0.79096	0.967742	0.84	1	1	0.892857	0.970149	1	0.907585	0.899002
292	0.989583	1	1	1	0.897059	0.757812	0.983051	0.964286	0.785311	1	0.92	1	1	0.878571	0.985075	1	0.908457	0.899998
293	0.958333	1	1	1	0.867647	0.828125	0.983051	0.916667	0.785311	1	0.893333	1	1	0.892857	1	1	0.909329	0.90111
294	0.989583	1	1	1	0.911765	0.773438	0.966102	0.928571	0.79096	1	0.88	1	1	0.9	1	1	0.909329	0.90112
295	0.96875	1	1	1	0.897059	0.78125	0.949153	0.952381	0.79096	0.967742	0.84	1	1	0.878571	1	1	0.902354	0.893339
296	0.96875	1	1	1	0.867647	0.773438	0.966102	0.928571	0.79661	1	0.88	0.954545	1	0.928571	0.985075	1	0.907585	0.898918
297	0.979167	1	1	1	0.882353	0.757812	0.949153	0.880952	0.79661	1	0.92	1	1	0.907143	0.925373	1	0.90061	0.89134
298	0.958333	1	1	1	0.970588	0.789062	0.949153	0.880952	0.785311	1	0.906667	1	1	0.914286	0.985075	1	0.909329	0.900947
299	1	1	1	1	0.926471	0.75	0.949153	0.904762	0.79096	1	0.933333	1	1	0.914286	0.940299	1	0.907585	0.899086
300	0.947917	1	1	1	0.941176	0.75	0.983051	0.916667	0.79096	1	0.933333	1	1	0.907143	0.985075	1	0.908457	0.900093
301	0.96875	1	1	1	0.882353	0.75	0.983051	0.916667	0.79661	1	0.92	1	1	0.907143	1	1	0.907585	0.899067
302	0.96875	1	1	1	0.941176	0.757812	1	0.940476	0.785311	1	0.866667	1	1	0.928571	0.985075	1	0.911072	0.90292
303	0.947917	1	1	1	0.911765	0.804688	0.983051	0.916667	0.79661	1	0.906667	1	1	0.878571	0.940299	1	0.905841	0.896999
304	0.947917	1	1	1	0.926471	0.765625	0.966102	0.928571	0.785311	1	0.933333	1	1	0.9	0.970149	1	0.906713	0.898102
305	0.989583	1	1	1	0.955882	0.796875	0.949153	0.916667	0.79096	1	0.893333	1	1	0.9	0.955224	1	0.911072	0.902794
306	0.96875	1	1	1	0.897059	0.796875	0.966102	0.940476	0.785311	1	0.893333	1	1	0.885714	0.940299	1	0.904969	0.896112
307	0.979167	1	1	1	0.882353	0.796875	0.983051	0.916667	0.779661	0.967742	0.893333	1	1	0.885714	0.985075	1	0.904969	0.896371
308	0.947917	1	1	1	0.897059	0.796875	0.983051	0.928571	0.785311	1	0.933333	1	1	0.914286	0.985075	1	0.911944	0.90373
309	0.958333	1	1	1	0.852941	0.773438	0.983051	0.928571	0.785311	0.967742	0.933333	1	1	0.9	0.970149	1	0.904098	0.895273
310	0.979167	1	1	1	0.897059	0.8125	1	0.928571	0.79661	1	0.88	1	1	0.878571	1	1	0.911944	0.903804
311	0.979167	1	1	1	0.897059	0.78125	0.983051	0.964286	0.774011	0.967742	0.893333	1	1	0.907143	0.970149	1	0.908457	0.900046
312	1	1	1	1	0.897059	0.71875	0.983051	0.916667	0.79096	1	0.88	1	1	0.892857	0.970149	1	0.90061	0.891528
313	0.979167	1	1	1	0.911765	0.765625	1	0.928571	0.779661	1	0.853333	1	1	0.9	0.985075	1	0.904969	0.896266
314	0.989583	1	1	1	0.926471	0.757812	0.949153	0.916667	0.79096	0.967742	0.88	1	1	0.892857	1	1	0.904969	0.896224
315	0.96875	1	1	1	0.897059	0.789062	0.966102	0.952381	0.785311	1	0.92	1	1	0.914286	0.985075	1	0.912816	0.904755
316	0.979167	1	1	1	0.911765	0.796875	0.966102	0.904762	0.785311	0.967742	0.893333	1	1	0.907143	0.970149	1	0.907585	0.89905
317	0.958333	1	1	1	0.838235	0.78125	0.983051	0.916667	0.785311	0.967742	0.88	1	1	0.907143	0.985075	1	0.901482	0.892414
318	0.96875	1	1	1	0.911765	0.804688	0.983051	0.916667	0.785311	1	0.946667	1	1	0.928571	0.970149	1	0.916303	0.908574
319	0.96875	1	1	1	0.882353	0.828125	0.983051	0.916667	0.779661	1	0.933333	1	1	0.892857	1	1	0.912816	0.904977
320	0.96875	1	1	1	0.926471	0.835938	0.932203	0.940476	0.79096	1	0.933333	1	1	0.9	0.955224	1	0.915432	0.90762
321	0.989583	1	1	1	0.897059	0.78125	0.966102	0.916667	0.79661	1	0.906667	1	1	0.885714	0.955224	1	0.906713	0.898108
322	0.958333	1	1	1	0.911765	0.78125	1	0.904762	0.79096	1	0.866667	1	1	0.864286	0.985075	1	0.901482	0.8924
323	0.96875	1	1	1	0.867647	0.765625	0.932203	0.916667	0.79096	0.967742	0.92	1	1	0.928571	0.955224	1	0.904098	0.895077
324	0.979167	1	1	1	0.897059	0.765625	0.983051	0.916667	0.79661	1	0.92	1	1	0.871429	0.970149	1	0.904969	0.896235
325	0.958333	1	1	1	0.926471	0.835938	0.915254	0.916667	0.79096	1	0.866667	1	1	0.892857	1	1	0.909329	0.900951
326	0.979167	1	1	1	0.926471	0.804688	0.983051	0.952381	0.785311	1	0.906667	1	1	0.9	0.970149	1	0.91456	0.906825
327	0.989583	1	1	1	0.941176	0.835938	0.966102	0.940476	0.79096	1	0.866667	1	1	0.9	0.985075	1	0.917175	0.909574
328	0.947917	1	1	1	0.897059	0.828125	0.983051	0.880952	0.740113	1	0.946667	1	1	0.9	0.970149	1	0.903226	0.894568
329	0.958333	1	1	1	0.897059	0.78125	0.966102	0.952381	0.757062	1	0.88	0.954545	1	0.892857	0.985075	1	0.90061	0.891594
330	0.979167	1	1	1	0.911765	0.78125	0.966102	0.821429	0.757062	1	0.853333	1	1	0.907143	0.985075	1	0.894507	0.884919
331	0.989583	1	1	1	0.941176	0.796875	0.949153	0.904762	0.740113	0.967742	0.8	1	1	0.892857	1	1	0.896251	0.886885
332	0.96875	1	1	1	0.882353	0.78125	1	0.928571	0.757062	1	0.906667	1	1	0.892857	0.970149	1	0.902354	0.893541
333	0.979167	1	1	1	0.926471	0.804688	0.966102	0.904762	0.734463	0.967742	0.92	1	1	0.878571	0.985075	1	0.90061	0.891736
334	0.979167	1	1	1	0.926471	0.78125	0.966102	0.928571	0.734463	0.967742	0.933333	1	1	0.892857	1	1	0.903226	0.894566
335	0.96875	1	1	1	0.897059	0.835938	1	0.952381	0.728814	0.967742	0.88	1	1	0.914286	1	1	0.908457	0.900416
336	0.947917	1	1	1	0.941176	0.867188	0.966102	0.904762	0.751412	0.967742	0.866667	1	1	0.914286	1	1	0.910201	0.902267
337	0.96875	1	1	1	0.955882	0.835938	0.983051	0.952381	0.734463	0.967742	0.813333	1	1	0.9	0.985075	1	0.904969	0.896715
338	0.958333	1	1	1	0.926471	0.828125	0.966102	0.928571	0.740113	1	0.866667	1	1	0.892857	0.970149	1	0.902354	0.89349
339	0.947917	1	1	1	0.926471	0.820312	0.949153	0.892857	0.745763	1	0.88	1	1	0.892857	0.970149	1	0.898867	0.889649
340	0.96875	1	1	1	0.926471	0.804688	0.983051	0.928571	0.734463	1	0.88	1	1	0.914286	0.970149	1	0.904098	0.895363
341	0.947917	1	1	1	0.926471	0.742188	0.949153	0.904762	0.734463	1	0.84	1	1	0.885714	0.970149	1	0.885789	0.875447
342	0.979167	1	1	1	0.897059	0.820312	1	0.916667	0.740113	1	0.866667	1	1	0.878571	1	1	0.902354	0.893637
343	0.958333	1	1	1	0.867647	0.765625	1	0.940476	0.745763	1	0.84	1	1	0.9	0.970149	1	0.894507	0.884852
344	0.958333	1	1	1	0.941176	0.8125	0.983051	0.940476	0.751412	1	0.906667	1	1	0.907143	0.970149	1	0.909329	0.901007
345	0.947917	1	1	1	0.911765	0.789062	0.949153	0.869048	0.740113	0.967742	0.96	1	1	0.928571	0.985075	1	0.901482	0.892729
346	0.947917	1	1	1	0.926471	0.84375	0.966102	0.880952	0.751412	1	0.906667	1	1	0.885714	0.970149	1	0.903226	0.894423
347	0.958333	1	1	1	0.911765	0.828125	1	0.916667	0.740113	1	0.866667	1	1	0.907143	0.985075	1	0.904969	0.896511
348	0.979167	1	1	1	0.926471	0.789062	0.983051	0.928571	0.734463	0.967742	0.933333	1	1	0.9	0.985075	1	0.904969	0.896427
349	0.958333	1	1	1	0.882353	0.773438	0.898305	0.904762	0.740113	0.967742	0.84	1	1	0.878571	0.985075	1	0.884917	0.874402
350	0.96875	1	1	1	0.897059	0.8125	0.966102	0.880952	0.740113	1	0.88	1	1	0.914286	0.970149	1	0.899738	0.890594
351	0.958333	1	1	1	0.897059	0.804688	0.949153	0.916667	0.740113	0.967742	0.906667	1	1	0.885714	0.985075	1	0.897995	0.888814
352	0.96875	1	1	1	0.941176	0.757812	0.966102	0.928571	0.745763	1	0.826667	1	1	0.907143	0.970149	1	0.896251	0.886772
353	0.96875	1	1	1	0.941176	0.773438	0.966102	0.892857	0.751412	0.967742	0.88	1	1	0.9	0.985075	1	0.898867	0.88972
354	0.947917	1	1	1	0.911765	0.828125	0.966102	0.952381	0.745763	1	0.84	1	1	0.907143	0.970149	1	0.903226	0.8945
355	0.979167	1	1	1	0.985294	0.804688	0.966102	0.892857	0.734463	1	0.786667	1	1	0.892857	0.970149	1	0.896251	0.88695
356	0.979167	1	1	1	0.911765	0.773438	1	0.892857	0.751412	1	0.893333	1	1	0.878571	0.985075	1	0.898867	0.889868
357	0.96875	1	1	1	0.926471	0.835938	0.966102	0.880952	0.740113	0.967742	0.973333	1	1	0.9	0.970149	1	0.907585	0.899395
358	0.958333	1	1	1	0.911765	0.835938	0.966102	0.904762	0.734463	1	0.866667	1	1	0.885714	1	1	0.90061	0.891801
359	0.979167	1	1	1	0.897059	0.734375	1	0.928571	0.740113	1	0.826667	1	1	0.935714	1	1	0.897995	0.888801
360	0.96875	1	1	1	0.897059	0.78125	0.983051	0.964286	0.745763	1	0.866667	1	1	0.914286	1	1	0.904969	0.896476
361	0.979167	1	1	1	0.970588	0.789062	0.966102	0.916667	0.751412	1	0.866667	1	1	0.892857	0.970149	1	0.903226	0.894458
362	0.958333	1	1	1	0.852941	0.820312	1	0.916667	0.740113	1	0.933333	1	1	0.907143	0.985075	1	0.904969	0.896561
363	0.96875	1	1	1	0.897059	0.8125	1	0.916667	0.734463	0.967742	0.88	1	1	0.9	0.985075	1	0.901482	0.892721
364	0.979167	1	1	1	0.970588	0.757812	1	0.892857	0.734463	1	0.84	1	1	0.885714	0.970149	1	0.894507	0.885145
365	1	1	1	1	0.941176	0.726562	0.966102	0.940476	0.751412	0.967742	0.866667	1	1	0.885714	0.985075	1	0.897123	0.887818
366	0.947917	1	1	1	0.926471	0.820312	0.966102	0.952381	0.734463	0.967742	0.906667	1	1	0.892857	0.985075	1	0.904098	0.895431
367	0.979167	1	1	1	0.941176	0.820312	0.966102	0.928571	0.745763	0.967742	0.92	1	1	0.885714	1	1	0.908457	0.900306
368	0.979167	1	1	1	0.911765	0.796875	0.966102	0.928571	0.740113	1	0.853333	1	1	0.9	0.985075	1	0.90061	0.891616
369	0.958333	1	1	1	0.941176	0.765625	0.966102	0.940476	0.751412	1	0.813333	1	1	0.885714	0.970149	1	0.894507	0.884845
370	0.958333	1	1	1	0.926471	0.804688	0.983051	0.916667	0.745763	1	0.853333	1	1	0.914286	1	1	0.904098	0.895631
371	0.958333	1	1	1	0.941176	0.773438	0.983051	0.892857	0.740113	0.967742	0.853333	1	1	0.914286	0.985075	1	0.897123	0.887845
372	0.979167	1	1	1	0.911765	0.757812	0.983051	0.904762	0.757062	1	0.853333	1	1	0.921429	0.940299	1	0.897995	0.888605
373	0.979167	1	1	1	0.897059	0.78125	0.983051	0.916667	0.745763	1	0.893333	1	1	0.892857	1	1	0.901482	0.892543
374	0.96875	1	1	1	0.926471	0.78125	0.983051	0.892857	0.745763	0.967742	0.946667	1	1	0.935714	0.970149	1	0.906713	0.898332
375	0.96875	1	1	1	0.897059	0.804688	0.949153	0.952381	0.740113	1	0.866667	1	1	0.907143	1	1	0.903226	0.894511
376	0.989583	1	1	1	0.911765	0.796875	1	0.952381	0.751412	0.967742	0.853333	1	1	0.885714	0.985075	1	0.904098	0.895526
377	0.916667	1	1	1	0.926471	0.742188	0.966102	0.97619	0.745763	1	0.906667	1	1	0.914286	0.985075	1	0.899738	0.890641
378	0.979167	1	1	1	0.926471	0.859375	0.983051	0.904762	0.728814	1	0.946667	1	1	0.907143	0.985075	1	0.912816	0.905317
379	0.989583	1	1	1	0.897059	0.804688	0.966102	0.916667	0.740113	1	0.893333	1	1	0.885714	0.985075	1	0.901482	0.892753
380	0.96875	1	1	1	0.897059	0.8125	1	0.928571	0.745763	1	0.826667	1	1	0.907143	0.985075	1	0.902354	0.893652
381	0.96875	1	1	1	0.926471	0.8125	0.983051	0.904762	0.723164	1	0.853333	1	1	0.907143	0.970149	1	0.898867	0.889851
382	0.96875	1	1	1	0.867647	0.765625	0.966102	0.952381	0.751412	1	0.92	1	1	0.885714	0.985075	1	0.899738	0.890826
383	0.96875	1	1	1	0.911765	0.828125	0.966102	0.940476	0.745763	1	0.853333	1	1	0.914286	0.985075	1	0.906713	0.898406
384	0.989583	1	1	1	0.926471	0.84375	1	0.928571	0.734463	0.967742	0.866667	1	1	0.9	0.970149	1	0.907585	0.899554
385	0.958333	1	1	1	0.911765	0.835938	0.983051	0.916667	0.745763	0.967742	0.84	1	1	0.914286	0.970149	1	0.903226	0.894677
386	0.989583	1	1	1	0.911765	0.8125	0.983051	0.892857	0.745763	1	0.933333	1	1	0.928571	0.985075	1	0.911072	0.903187
387	0.989583	1	1	1	0.911765	0.796875	1	0.904762	0.728814	1	0.92	1	1	0.907143	0.970149	1	0.904098	0.895566
388	0.96875	1	1	1	0.955882	0.773438	0.983051	0.928571	0.745763	0.967742	0.88	1	1	0.907143	0.985075	1	0.903226	0.89446
389	0.958333	1	1	1	0.941176	0.828125	0.966102	0.964286	0.751412	1	0.893333	1	1	0.9	0.985075	1	0.911072	0.903125
390	0.958333	1	1	1	0.852941	0.8125	0.966102	0.928571	0.745763	1	0.826667	1	1	0.921429	0.985075	1	0.898867	0.889717
391	0.96875	1	1	1	0.911765	0.773438	0.983051	0.880952	0.728814	1	0.88	1	1	0.9	0.970149	1	0.893636	0.884228
392	0.96875	1	1	1	0.926471	0.820312	1	0.904762	0.751412	1	0.973333	1	1	0.907143	1	1	0.91456	0.907111
393	0.958333	1	1	1	0.941176	0.8125	0.966102	0.928571	0.740113	0.967742	0.893333	1	1	0.914286	0.985075	1	0.905841	0.897412
394	0.958333	1	1	1	0.897059	0.828125	0.966102	0.952381	0.745763	1	0.88	1	1	0.9	1	1	0.906713	0.898441
395	0.927083	1	1	1	0.941176	0.8125	1	0.940476	0.745763	0.967742	0.88	1	1	0.914286	0.985075	1	0.905841	0.897462
396	0.96875	1	1	1	0.882353	0.8125	0.983051	0.952381	0.745763	1	0.88	1	1	0.878571	0.985075	1	0.902354	0.893607
397	0.947917	1	1	1	0.911765	0.796875	1	0.940476	0.745763	0.967742	0.906667	1	1	0.9	0.985075	1	0.904098	0.89557
398	0.96875	1	1	1	0.897059	0.78125	0.915254	0.916667	0.745763	0.967742	0.933333	1	1	0.892857	0.955224	1	0.896251	0.886903
399	0.96875	1	1	1	0.911765	0.835938	0.983051	0.904762	0.745763	0.967742	0.946667	1	1	0.907143	1	1	0.911072	0.903289
400	1	1	1	1	0.926471	0.8125	0.983051	0.940476	0.751412	0.967742	0.946667	1	1	0.921429	1	1	0.917175	0.909795
401	0.979167	1	1	1	0.882353	0.742188	0.983051	0.928571	0.740113	1	0.88	1	1	0.907143	0.955224	1	0.894507	0.884989
402	0.96875	1	1	1	0.941176	0.789062	0.949153	0.904762	0.745763	1	0.946667	1	1	0.935714	1	1	0.910201	0.902151
403	0.96875	1	1	0.958333	0.911765	0.820312	1	0.880952	0.723164	0.967742	0.826667	1	1	0.885714	0.970149	1	0.891892	0.882276
404	0.979167	1	1	1	0.955882	0.828125	0.966102	0.880952	0.728814	1	0.88	1	1	0.935714	1	1	0.908457	0.900516
405	0.958333	1	1	1	0.911765	0.820312	0.949153	0.904762	0.734463	0.967742	0.88	1	1	0.907143	0.985075	1	0.899738	0.890878
406	0.958333	1	1	1	0.897059	0.773438	1	0.940476	0.734463	0.967742	0.853333	1	1	0.9	0.970149	1	0.895379	0.885889
407	0.96875	1	1	1	0.867647	0.796875	0.966102	0.952381	0.740113	0.967742	0.84	1	1	0.921429	0.970149	1	0.898867	0.889907
408	0.979167	1	1	1	0.911765	0.804688	0.966102	0.904762	0.740113	1	0.946667	1	1	0.9	0.970149	1	0.904969	0.89658
409	0.979167	1	1	1	0.941176	0.804688	0.966102	0.952381	0.734463	1	0.813333	1	1	0.928571	0.985075	1	0.904969	0.896492
410	0.979167	1	1	1	0.897059	0.851562	0.983051	0.904762	0.728814	0.967742	0.92	1	1	0.907143	0.985075	1	0.907585	0.899533
411	0.979167	1	1	1	0.926471	0.75	0.949153	0.916667	0.751412	1	0.906667	1	1	0.885714	1	1	0.898867	0.889847
412	0.96875	1	1	1	0.897059	0.84375	1	0.928571	0.745763	1	0.906667	1	1	0.907143	0.970149	1	0.910201	0.902256
413	0.979167	1	1	1	0.897059	0.828125	0.983051	0.904762	0.728814	1	0.893333	1	1	0.907143	0.955224	1	0.902354	0.893779
414	0.989583	1	1	1	0.897059	0.8125	0.932203	0.892857	0.734463	1	0.88	1	1	0.9	1	1	0.899738	0.890959
415	1	1	1	1	0.911765	0.804688	0.932203	0.97619	0.728814	0.967742	0.92	1	1	0.9	0.970149	1	0.905841	0.897561
416	0.979167	1	1	1	0.941176	0.820312	0.983051	0.904762	0.745763	1	0.946667	1	1	0.907143	1	1	0.912816	0.905107
417	0.989583	1	1	1	0.926471	0.820312	0.966102	0.904762	0.723164	1	0.88	1	1	0.907143	0.985075	1	0.903226	0.894738
418	0.96875	1	1	1	0.897059	0.796875	0.966102	0.964286	0.740113	1	0.906667	1	1	0.914286	0.985075	1	0.906713	0.89831
419	0.96875	1	1	1	0.941176	0.820312	0.983051	0.928571	0.728814	0.967742	0.893333	1	1	0.892857	0.970149	1	0.903226	0.894668
420	0.96875	1	1	1	0.867647	0.8125	0.983051	0.928571	0.728814	0.967742	0.946667	1	1	0.9	0.985075	1	0.903226	0.894802
421	0.958333	1	1	1	0.941176	0.820312	1	0.904762	0.728814	1	0.893333	1	1	0.907143	1	1	0.905841	0.897486
422	0.958333	1	1	1	0.941176	0.820312	0.983051	0.97619	0.740113	1	0.88	1	1	0.885714	0.985075	1	0.907585	0.899409
423	0.979167	1	1	1	0.926471	0.789062	0.932203	0.916667	0.740113	0.967742	0.866667	1	1	0.921429	0.985075	1	0.90061	0.89157
424	0.958333	1	1	1	0.926471	0.804688	0.966102	0.904762	0.740113	1	0.866667	1	1	0.907143	0.970149	1	0.899738	0.890788
425	0.947917	1	1	1	0.926471	0.78125	1	0.928571	0.734463	1	0.866667	1	1	0.9	0.985075	1	0.898867	0.889968
426	0.96875	1	1	1	0.897059	0.757812	0.983051	0.928571	0.740113	1	0.786667	1	1	0.9	1	1	0.891892	0.882211
427	0.958333	1	1	1	0.926471	0.8125	0.949153	0.964286	0.734463	1	0.933333	1	1	0.9	0.940299	1	0.904969	0.896558
428	0.958333	1	1	1	0.911765	0.828125	0.932203	0.940476	0.740113	1	0.853333	1	1	0.9	0.970149	1	0.90061	0.891738
429	0.96875	1	1	1	0.941176	0.828125	0.949153	0.928571	0.734463	1	0.84	1	1	0.9	0.985075	1	0.902354	0.893643
430	0.96875	1	1	1	0.926471	0.851562	0.949153	0.916667	0.734463	1	0.92	1	1	0.885714	0.985075	1	0.906713	0.898437
431	0.96875	1	1	1	0.867647	0.84375	0.932203	0.904762	0.728814	1	0.92	1	1	0.9	0.985075	1	0.901482	0.892722
432	0.958333	1	1	1	0.941176	0.773438	0.949153	0.928571	0.745763	0.967742	0.893333	1	1	0.892857	0.970149	1	0.897995	0.888698
433	0.96875	1	1	1	0.911765	0.835938	0.966102	0.988095	0.740113	1	0.88	1	1	0.907143	0.970149	1	0.910201	0.902182
434	0.947917	1	1	1	0.882353	0.8125	0.915254	0.928571	0.745763	0.967742	0.933333	1	1	0.935714	0.955224	1	0.903226	0.89453
435	0.958333	1	1	1	0.926471	0.820312	0.949153	0.916667	0.740113	1	0.853333	1	1	0.9	0.940299	1	0.897995	0.888836
436	0.958333	1	1	1	0.897059	0.820312	0.983051	0.964286	0.740113	0.967742	0.893333	1	1	0.892857	0.940299	1	0.902354	0.893641
437	0.9375	1	1	1	0.926471	0.804688	0.983051	0.916667	0.740113	0.967742	0.906667	1	1	0.892857	0.970149	1	0.899738	0.890793
438	0.958333	1	1	1	0.955882	0.773438	0.966102	0.928571	0.734463	1	0.906667	1	1	0.914286	0.955224	1	0.901482	0.892509
439	0.989583	1	1	1	0.897059	0.8125	0.983051	0.904762	0.740113	1	0.84	1	1	0.914286	0.985075	1	0.902354	0.893626
440	0.947917	1	1	1	0.926471	0.835938	1	0.964286	0.723164	1	0.906667	1	1	0.907143	0.985075	1	0.909329	0.90134
441	0.947917	1	1	1	0.926471	0.804688	0.983051	0.940476	0.745763	0.967742	0.893333	1	1	0.907143	1	1	0.905841	0.897342
442	0.958333	1	1	1	0.852941	0.84375	0.966102	0.869048	0.740113	0.967742	0.84	1	1	0.885714	0.985075	1	0.892764	0.883176
443	0.96875	1	1	1	0.941176	0.867188	0.966102	0.952381	0.723164	0.967742	0.88	1	1	0.914286	1	1	0.911944	0.904293
444	0.958333	1	1	1	0.897059	0.828125	0.983051	0.940476	0.728814	1	0.92	1	1	0.9	1	1	0.906713	0.898373
445	0.979167	1	1	1	0.911765	0.828125	1	0.928571	0.751412	1	0.853333	1	1	0.892857	0.985075	1	0.906713	0.89844
446	0.958333	1	1	1	0.911765	0.835938	0.966102	0.940476	0.745763	1	0.933333	1	1	0.9	0.985075	1	0.910201	0.902089
447	0.958333	1	1	1	0.941176	0.8125	0.949153	0.869048	0.745763	0.967742	0.866667	1	1	0.914286	1	1	0.90061	0.891792
448	0.989583	1	1	1	0.911765	0.851562	0.983051	0.952381	0.740113	0.967742	0.88	0.954545	1	0.921429	0.970149	1	0.911944	0.904033
449	0.979167	1	1	1	0.911765	0.820312	0.966102	0.928571	0.745763	1	0.946667	1	1	0.907143	0.985075	1	0.911072	0.903156
450	0.958333	1	1	1	0.897059	0.796875	1	0.952381	0.751412	1	0.88	1	1	0.892857	0.970149	1	0.903226	0.894467
451	0.989583	1	1	1	0.911765	0.789062	0.966102	0.892857	0.745763	1	0.853333	1	1	0.892857	1	1	0.898867	0.889754
452	0.979167	1	1	0.958333	0.970588	0.867188	0.966102	0.940476	0.740113	1	0.866667	1	1	0.878571	0.985075	1	0.910201	0.902348
453	0.96875	1	1	1	0.970588	0.8125	0.932203	0.964286	0.723164	1	0.866667	1	1	0.914286	0.940299	1	0.903226	0.894796
454	0.96875	1	1	1	0.911765	0.789062	1	0.952381	0.740113	1	0.853333	1	1	0.892857	0.970149	1	0.90061	0.891733
455	0.96875	1	1	1	0.926471	0.820312	0.966102	0.964286	0.734463	0.967742	0.92	1	1	0.9	0.955224	1	0.906713	0.898336
456	0.979167	1	1	1	0.882353	0.78125	0.966102	0.940476	0.757062	1	0.866667	1	1	0.9	0.970149	1	0.90061	0.891585
457	0.958333	1	1	1	0.897059	0.820312	0.949153	0.904762	0.751412	0.967742	0.853333	1	1	0.892857	0.985075	1	0.897995	0.888728
458	0.96875	1	1	1	0.985294	0.859375	0.966102	0.916667	0.745763	0.967742	0.88	1	1	0.907143	0.970149	1	0.911944	0.90419
459	0.958333	1	1	1	0.941176	0.835938	0.949153	0.952381	0.751412	0.967742	0.933333	1	1	0.9	0.955224	1	0.910201	0.902134
460	0.96875	1	1	1	0.926471	0.84375	1	0.928571	0.751412	1	0.853333	1	1	0.914286	0.955224	1	0.909329	0.901191
461	0.979167	1	1	1	0.882353	0.8125	0.966102	0.904762	0.768362	1	0.92	1	1	0.914286	0.955224	1	0.907585	0.899122
462	0.958333	1	1	1	0.955882	0.773438	0.966102	0.964286	0.762712	1	0.8	1	1	0.914286	0.985075	1	0.903226	0.894553
463	0.9375	1	1	1	0.911765	0.835938	0.983051	0.928571	0.757062	1	0.866667	1	1	0.914286	0.970149	1	0.906713	0.89825
464	0.979167	1	1	1	0.867647	0.8125	0.983051	0.880952	0.768362	1	0.853333	1	1	0.892857	0.970149	1	0.899738	0.890614
465	0.96875	1	1	1	0.911765	0.859375	1	0.940476	0.751412	1	0.933333	1	1	0.892857	1	1	0.916303	0.908852
466	0.958333	1	1	1	0.882353	0.804688	0.983051	0.928571	0.740113	0.967742	0.84	1	1	0.907143	1	1	0.898867	0.889859
467	0.947917	1	1	1	0.926471	0.84375	0.966102	0.97619	0.762712	0.967742	0.893333	1	1	0.885714	0.955224	1	0.909329	0.901288
468	0.979167	1	1	1	0.897059	0.828125	0.983051	0.928571	0.740113	1	0.88	1	1	0.907143	0.955224	1	0.904969	0.896608
469	0.979167	1	1	1	0.867647	0.828125	0.966102	0.952381	0.745763	1	0.906667	1	1	0.871429	0.970149	1	0.903226	0.894613
470	0.958333	1	1	1	0.852941	0.820312	0.932203	0.928571	0.757062	1	0.88	1	1	0.907143	0.940299	1	0.898867	0.889633
471	0.979167	1	1	1	0.941176	0.875	0.966102	0.940476	0.745763	0.967742	0.92	1	1	0.885714	0.970149	1	0.913688	0.906104
472	0.947917	1	1	1	0.882353	0.835938	1	0.928571	0.745763	1	0.906667	1	1	0.892857	0.970149	1	0.904969	0.896405
473	0.979167	1	1	1	0.897059	0.851562	0.983051	0.952381	0.757062	0.967742	0.893333	1	1	0.914286	0.970149	1	0.913688	0.905994
474	0.96875	1	1	1	0.926471	0.820312	0.983051	0.892857	0.768362	1	0.933333	1	1	0.907143	0.970149	1	0.911072	0.902966
475	0.96875	1	1	1	0.882353	0.765625	0.983051	0.928571	0.768362	0.967742	0.826667	1	1	0.921429	0.970149	1	0.898867	0.889599
476	0.979167	1	1	1	0.926471	0.78125	0.983051	0.928571	0.745763	0.967742	0.88	1	1	0.892857	0.985075	1	0.901482	0.892653
477	0.947917	1	1	1	0.926471	0.851562	0.932203	0.928571	0.762712	1	0.853333	1	1	0.907143	0.985075	1	0.907585	0.899323
478	0.979167	1	1	1	0.970588	0.773438	0.915254	0.952381	0.768362	1	0.88	1	1	0.9	0.985075	1	0.906713	0.898219
479	0.958333	1	1	1	0.897059	0.773438	0.983051	0.964286	0.740113	1	0.893333	1	1	0.885714	0.970149	1	0.898867	0.889825
480	0.96875	1	1	1	0.941176	0.78125	0.966102	0.916667	0.768362	0.967742	0.866667	1	1	0.9	1	1	0.904098	0.895301
481	0.9375	1	1	1	0.941176	0.804688	0.966102	0.940476	0.757062	1	0.893333	1	1	0.928571	0.985075	1	0.909329	0.90107
482	0.979167	1	1	1	0.911765	0.851562	0.949153	0.928571	0.757062	1	0.906667	0.954545	1	0.9	0.940299	1	0.908457	0.900243
483	0.958333	1	1	1	0.852941	0.835938	0.966102	0.928571	0.762712	1	0.946667	1	1	0.907143	0.970149	1	0.909329	0.901107
484	0.96875	1	1	1	0.955882	0.8125	0.983051	0.940476	0.779661	0.967742	0.866667	1	1	0.9	0.970149	1	0.911072	0.903013
485	0.979167	1	1	1	0.941176	0.835938	0.949153	0.916667	0.762712	1	0.813333	1	1	0.921429	0.955224	1	0.906713	0.89843
486	0.979167	1	1	1	0.955882	0.820312	0.983051	0.892857	0.762712	0.967742	0.84	1	1	0.885714	0.985075	1	0.904098	0.895482
487	0.947917	1	1	1	0.926471	0.804688	0.949153	0.916667	0.768362	1	0.866667	1	1	0.892857	0.985075	1	0.902354	0.893381
488	0.96875	1	1	1	0.941176	0.796875	1	0.928571	0.740113	1	0.933333	1	1	0.907143	0.985075	1	0.909329	0.901239
489	0.958333	1	1	1	0.882353	0.789062	0.966102	0.928571	0.762712	0.967742	0.866667	1	1	0.935714	0.970149	1	0.903226	0.894417
490	0.9375	1	1	1	0.882353	0.835938	0.966102	0.964286	0.768362	1	0.853333	1	1	0.914286	0.970149	1	0.907585	0.899173
491	0.96875	1	1	1	0.926471	0.882812	1	0.940476	0.757062	0.967742	0.826667	1	1	0.9	0.970149	1	0.911944	0.904209
492	0.96875	1	1	1	0.852941	0.828125	0.983051	0.940476	0.745763	0.967742	0.893333	0.954545	1	0.907143	0.985075	1	0.904098	0.895434
493	0.96875	1	1	1	0.911765	0.78125	0.983051	0.97619	0.762712	0.967742	0.96	1	1	0.9	0.985075	1	0.911944	0.904026
494	0.9375	1	1	1	0.911765	0.804688	0.983051	0.940476	0.745763	0.967742	0.893333	1	1	0.885714	0.985075	1	0.90061	0.891561
495	0.96875	1	1	1	0.911765	0.773438	0.983051	0.940476	0.757062	0.967742	0.92	1	1	0.9	0.970149	1	0.904098	0.895413
496	0.947917	1	1	1	0.911765	0.796875	0.949153	0.952381	0.768362	0.935484	0.933333	1	1	0.914286	0.970149	1	0.907585	0.899103
497	0.9375	1	1	1	0.926471	0.828125	1	0.928571	0.757062	1	0.92	1	1	0.914286	0.985075	1	0.911944	0.904108
498	0.9375	1	1	1	0.882353	0.84375	0.966102	0.964286	0.768362	1	0.906667	1	1	0.907143	0.970149	1	0.911072	0.903058
499	0.979167	1	1	1	0.911765	0.796875	0.983051	0.892857	0.751412	0.967742	0.88	1	1	0.907143	0.985075	1	0.902354	0.893643
500	0.96875	1	1	1	0.911765	0.835938	1	0.940476	0.762712	1	0.893333	1	1	0.9	0.970149	1	0.911944	0.904058
501	0.96875	1	1	1	0.926471	0.804688	0.966102	0.916667	0.751412	0.967742	0.88	1	1	0.9	0.970149	1	0.902354	0.893574
502	0.947917	1	1	1	0.882353	0.8125	0.949153	0.952381	0.762712	0.967742	0.893333	1	1	0.914286	0.970149	1	0.904969	0.896285
503	0.9375	1	1	1	0.911765	0.804688	0.966102	0.940476	0.757062	0.967742	0.88	1	1	0.942857	0.985075	1	0.907585	0.899117
504	0.947917	1	1	1	0.941176	0.828125	0.983051	0.940476	0.768362	1	0.866667	1	1	0.907143	0.970149	1	0.910201	0.90216
505	0.9375	1	1	1	0.926471	0.820312	1	0.964286	0.745763	1	0.893333	1	1	0.921429	1	1	0.911944	0.9042
506	0.96875	1	1	1	0.897059	0.789062	0.966102	0.904762	0.751412	1	0.893333	1	1	0.9	0.970149	1	0.899738	0.890568
507	0.9375	1	1	1	0.911765	0.804688	0.983051	0.928571	0.768362	1	0.866667	1	1	0.907143	0.985075	1	0.904969	0.896299
508	0.96875	1	1	1	0.970588	0.8125	0.983051	0.952381	0.740113	1	0.826667	1	1	0.921429	0.985075	1	0.908457	0.900294
509	0.958333	1	1	1	0.897059	0.820312	0.949153	0.964286	0.757062	1	0.893333	1	1	0.928571	1	1	0.911944	0.904139
510	0.979167	1	1	1	0.926471	0.820312	0.983051	0.928571	0.762712	1	0.853333	1	1	0.935714	0.985075	1	0.912816	0.904955
511	0.958333	1	1	1	0.867647	0.78125	0.983051	0.916667	0.740113	0.967742	0.92	1	1	0.928571	0.985075	1	0.901482	0.892534
512	0.989583	1	1	1	0.911765	0.8125	0.949153	0.940476	0.774011	1	0.92	1	1	0.885714	0.985075	1	0.911072	0.90301
513	0.96875	1	1	1	0.955882	0.835938	0.983051	0.964286	0.757062	1	0.853333	1	1	0.914286	0.970149	1	0.913688	0.905953
514	0.958333	1	1	1	0.897059	0.835938	0.949153	0.928571	0.751412	1	0.92	1	1	0.914286	0.970149	1	0.908457	0.900357
515	0.96875	1	1	1	0.941176	0.78125	0.949153	0.928571	0.757062	1	0.88	1	1	0.9	0.985075	1	0.903226	0.894393
516	0.958333	1	1	1	0.941176	0.820312	0.966102	0.928571	0.762712	0.967742	0.906667	0.954545	1	0.907143	0.985075	1	0.909329	0.901118
517	0.96875	1	1	1	0.926471	0.84375	0.949153	0.928571	0.762712	1	0.866667	1	1	0.892857	0.970149	1	0.907585	0.899321
518	0.958333	1	1	1	0.882353	0.804688	0.966102	0.952381	0.762712	0.967742	0.893333	1	1	0.914286	0.985075	1	0.906713	0.898247
519	0.947917	1	1	1	0.897059	0.859375	0.949153	0.928571	0.768362	1	0.893333	1	1	0.914286	0.970149	1	0.911072	0.902955
520	0.947917	1	1	1	0.941176	0.804688	0.949153	0.964286	0.757062	1	0.933333	1	1	0.914286	0.985075	1	0.911944	0.903915
521	0.979167	1	1	1	0.926471	0.828125	1	0.916667	0.757062	0.935484	0.893333	1	1	0.907143	0.955224	1	0.908457	0.900251
522	0.979167	1	1	1	0.911765	0.8125	0.983051	0.940476	0.751412	0.967742	0.866667	1	1	0.928571	1	1	0.910201	0.901984
523	0.947917	1	1	1	0.911765	0.8125	0.966102	0.940476	0.762712	1	0.906667	1	1	0.9	0.985075	1	0.907585	0.899399
524	0.96875	1	1	1	0.970588	0.851562	0.949153	0.940476	0.740113	0.935484	0.866667	1	1	0.9	0.970149	1	0.907585	0.899422
525	0.958333	1	1	1	0.897059	0.8125	0.983051	0.892857	0.757062	1	0.933333	1	1	0.892857	0.985075	1	0.904969	0.896458
526	0.958333	1	1	1	0.867647	0.851562	0.966102	0.916667	0.757062	0.967742	0.933333	1	1	0.907143	0.970149	1	0.908457	0.900105
527	0.9375	1	1	1	0.882353	0.8125	0.983051	0.952381	0.768362	1	0.866667	1	1	0.914286	1	1	0.907585	0.89913
528	0.979167	1	1	1	0.852941	0.835938	0.983051	0.928571	0.768362	1	0.906667	1	1	0.914286	0.985075	1	0.911944	0.903949
529	0.9375	1	1	1	0.852941	0.84375	0.983051	0.97619	0.774011	1	0.88	1	1	0.907143	0.970149	1	0.910201	0.902074
530	0.979167	1	1	1	0.941176	0.820312	0.983051	0.904762	0.774011	0.967742	0.866667	1	1	0.921429	0.985075	1	0.911944	0.903951
531	0.958333	1	1	1	0.882353	0.789062	0.966102	0.916667	0.774011	1	0.866667	1	1	0.9	0.985075	1	0.901482	0.892491
532	0.90625	1	1	1	0.911765	0.820312	1	0.916667	0.757062	1	0.866667	1	1	0.892857	0.970149	1	0.899738	0.890673
533	0.989583	1	1	1	0.926471	0.820312	1	0.940476	0.745763	1	0.866667	1	1	0.928571	0.985075	1	0.912816	0.905181
534	0.947917	1	1	1	0.970588	0.867188	0.949153	0.940476	0.762712	0.967742	0.88	1	1	0.9	0.985075	1	0.913688	0.905933
535	0.989583	1	1	1	0.955882	0.835938	0.949153	0.916667	0.757062	1	0.88	1	1	0.885714	0.955224	1	0.907585	0.899292
536	0.979167	1	1	1	0.911765	0.804688	0.983051	0.916667	0.762712	1	0.88	1	1	0.907143	0.985075	1	0.907585	0.899128
537	0.96875	1	1	1	0.926471	0.84375	0.983051	0.904762	0.762712	1	0.88	1	1	0.914286	1	1	0.912816	0.904945
538	0.958333	1	1	1	0.941176	0.835938	1	0.952381	0.757062	1	0.893333	1	1	0.878571	0.970149	1	0.910201	0.902213
539	0.9375	1	1	1	0.867647	0.78125	0.949153	0.964286	0.774011	1	0.866667	1	1	0.914286	1	1	0.903226	0.894342
540	0.9375	1	1	1	0.941176	0.84375	0.983051	0.940476	0.768362	1	0.866667	1	1	0.907143	0.970149	1	0.911072	0.90303
541	0.96875	1	1	1	0.955882	0.820312	0.983051	0.928571	0.774011	0.967742	0.906667	1	1	0.885714	0.985075	1	0.911944	0.903925
542	0.958333	1	1	1	0.926471	0.828125	0.983051	0.940476	0.774011	0.967742	0.893333	1	1	0.907143	0.985075	1	0.912816	0.904953
543	0.96875	1	1	1	0.911765	0.859375	0.983051	0.964286	0.757062	1	0.933333	1	1	0.885714	0.985075	1	0.916303	0.909112
544	0.958333	1	1	1	0.882353	0.859375	0.983051	0.97619	0.762712	0.967742	0.8	1	1	0.914286	0.970149	1	0.908457	0.900327
545	0.947917	1	1	1	0.867647	0.867188	0.983051	0.940476	0.774011	0.967742	0.893333	1	1	0.892857	0.970149	1	0.910201	0.902133
546	0.96875	1	1	1	0.970588	0.796875	0.966102	1	0.751412	0.967742	0.853333	1	1	0.9	0.985075	1	0.909329	0.901326
547	0.96875	1	1	1	0.926471	0.8125	0.983051	0.952381	0.745763	1	0.92	1	1	0.928571	0.970149	1	0.912816	0.904959
548	0.958333	1	1	1	0.941176	0.8125	0.983051	0.964286	0.762712	1	0.906667	1	1	0.907143	0.985075	1	0.913688	0.905874
549	0.9375	1	1	1	0.941176	0.78125	0.949153	0.964286	0.745763	1	0.866667	1	1	0.914286	0.970149	1	0.901482	0.892538
550	0.979167	1	1	1	0.867647	0.8125	0.966102	0.97619	0.762712	1	0.826667	1	1	0.921429	1	1	0.908457	0.900309
551	0.979167	1	1	1	0.911765	0.820312	0.983051	0.952381	0.768362	1	0.893333	1	1	0.885714	0.955224	1	0.909329	0.901164
552	0.96875	1	1	1	0.867647	0.78125	0.966102	0.97619	0.762712	1	0.866667	1	1	0.914286	0.985075	1	0.904969	0.896346
553	0.9375	1	1	1	0.911765	0.828125	0.966102	0.928571	0.762712	1	0.92	1	1	0.921429	0.985075	1	0.911072	0.903081
554	0.979167	1	1	1	0.867647	0.78125	0.966102	0.928571	0.757062	1	0.906667	1	1	0.907143	1	1	0.904098	0.895445
555	0.989583	1	1	1	0.897059	0.8125	0.932203	0.952381	0.762712	1	0.866667	1	1	0.914286	0.985075	1	0.908457	0.900334
556	0.96875	1	1	1	0.955882	0.851562	0.949153	0.97619	0.779661	0.967742	0.88	1	1	0.9	0.985075	1	0.918047	0.910626
557	0.958333	1	1	1	0.941176	0.796875	0.983051	0.940476	0.762712	0.967742	0.92	1	1	0.914286	1	1	0.911944	0.904009
558	0.979167	1	1	1	0.897059	0.820312	1	0.952381	0.740113	0.967742	0.92	1	1	0.9	0.985075	1	0.909329	0.901183
559	0.958333	1	1	1	0.926471	0.867188	0.966102	0.97619	0.745763	0.935484	0.866667	1	1	0.914286	0.970149	1	0.911944	0.904122
560	0.9375	1	1	1	0.911765	0.828125	0.949153	0.952381	0.768362	1	0.88	1	1	0.892857	0.955224	1	0.904969	0.896261
561	0.947917	1	1	1	0.882353	0.867188	0.983051	0.952381	0.757062	1	0.92	1	1	0.892857	0.955224	1	0.911072	0.903114
562	0.947917	1	1	1	0.897059	0.765625	1	0.928571	0.779661	1	0.88	1	1	0.9	0.985075	1	0.903226	0.894369
563	0.947917	1	1	1	0.882353	0.796875	1	0.916667	0.774011	1	0.933333	1	1	0.907143	0.985075	1	0.908457	0.900185
564	0.989583	1	1	1	0.867647	0.828125	0.915254	0.928571	0.774011	1	0.853333	1	1	0.907143	0.970149	1	0.904969	0.896377
565	0.958333	1	1	1	0.897059	0.78125	0.983051	0.928571	0.779661	1	0.906667	1	1	0.9	0.970149	1	0.905841	0.897216
566	0.927083	1	1	1	0.882353	0.851562	0.983051	0.928571	0.745763	1	0.866667	1	1	0.907143	0.985075	1	0.904098	0.895517
567	0.947917	1	1	1	0.970588	0.796875	0.983051	0.964286	0.774011	1	0.92	1	1	0.914286	0.970149	1	0.915432	0.907779
568	0.9375	1	1	1	0.897059	0.84375	0.983051	0.904762	0.768362	1	0.893333	1	1	0.9	0.985075	1	0.907585	0.899221
569	0.979167	1	1	1	0.926471	0.820312	0.966102	0.928571	0.768362	0.935484	0.906667	1	1	0.9	1	1	0.911072	0.90296
570	0.927083	1	1	1	0.911765	0.828125	0.949153	0.940476	0.762712	1	0.933333	1	1	0.935714	0.970149	1	0.911944	0.903882
571	0.979167	1	1	1	0.897059	0.8125	0.983051	0.952381	0.768362	1	0.906667	1	1	0.907143	0.955224	1	0.911072	0.903106
572	0.979167	1	1	1	0.897059	0.820312	1	0.916667	0.774011	1	0.906667	1	1	0.907143	0.970149	1	0.911944	0.903943
573	0.947917	1	1	1	0.955882	0.835938	0.949153	0.952381	0.774011	0.967742	0.826667	1	1	0.9	0.970149	1	0.907585	0.89927
574	0.958333	1	1	1	0.897059	0.859375	0.949153	0.952381	0.768362	0.967742	0.813333	1	1	0.9	0.985075	1	0.906713	0.898266
575	0.947917	1	1	1	0.955882	0.8125	1	0.916667	0.774011	1	0.88	1	1	0.928571	1	1	0.91456	0.906767
576	0.947917	1	1	1	0.926471	0.859375	0.966102	0.97619	0.751412	1	0.92	1	1	0.9	0.970149	1	0.91456	0.907029
577	0.9375	1	1	1	0.926471	0.882812	0.966102	0.916667	0.785311	1	0.906667	1	1	0.9	0.955224	1	0.915432	0.907745
578	0.9375	1	1	1	0.926471	0.804688	0.949153	0.964286	0.762712	1	0.893333	1	1	0.928571	0.970149	1	0.909329	0.901106
579	0.947917	1	1	1	0.911765	0.820312	1	0.952381	0.768362	0.967742	0.866667	1	1	0.892857	0.970149	1	0.906713	0.89822
580	0.9375	1	1	1	0.926471	0.859375	0.966102	0.964286	0.751412	0.967742	0.893333	1	1	0.9	1	1	0.911944	0.904161
581	0.958333	1	1	1	0.941176	0.867188	0.966102	0.952381	0.762712	0.967742	0.893333	1	1	0.907143	0.955224	1	0.91456	0.906839
582	0.9375	1	1	1	0.985294	0.820312	0.966102	0.964286	0.757062	1	0.866667	1	1	0.914286	0.985075	1	0.911944	0.904
583	0.958333	1	1	1	0.867647	0.828125	0.983051	0.940476	0.757062	1	0.906667	1	1	0.907143	0.985075	1	0.908457	0.900273
584	0.947917	1	1	1	0.911765	0.765625	0.932203	0.940476	0.762712	1	0.893333	1	1	0.892857	0.985075	1	0.898867	0.889735
585	0.96875	1	1	1	0.882353	0.820312	0.949153	0.940476	0.740113	1	0.88	1	1	0.892857	0.970149	1	0.90061	0.891724
586	0.96875	1	1	1	0.926471	0.820312	1	0.940476	0.745763	0.967742	0.84	1	1	0.907143	0.985075	1	0.905841	0.897425
587	0.947917	1	1	1	0.926471	0.789062	0.966102	0.916667	0.757062	0.935484	0.906667	1	1	0.9	0.985075	1	0.901482	0.892493
588	0.958333	1	1	1	0.911765	0.789062	0.949153	0.904762	0.768362	1	0.88	1	1	0.914286	0.955224	1	0.901482	0.892455
589	0.958333	1	1	1	0.941176	0.796875	0.983051	0.964286	0.774011	1	0.92	1	1	0.9	0.985075	1	0.913688	0.905842
590	0.927083	1	1	1	0.897059	0.84375	0.949153	0.904762	0.774011	0.935484	0.92	1	1	0.928571	0.985075	1	0.909329	0.901043
591	0.96875	1	1	1	0.897059	0.875	0.983051	0.880952	0.768362	1	0.893333	1	1	0.892857	0.985075	1	0.911072	0.90313
592	0.947917	1	1	1	0.882353	0.820312	0.983051	0.964286	0.762712	0.967742	0.88	1	1	0.921429	0.985075	1	0.909329	0.901243
593	0.96875	1	1	1	0.867647	0.851562	0.983051	0.880952	0.745763	1	0.933333	1	1	0.9	0.985075	1	0.906713	0.89855
594	0.947917	1	1	1	0.970588	0.867188	0.932203	0.916667	0.768362	1	0.906667	1	1	0.9	0.970149	1	0.913688	0.905891
595	0.979167	1	1	1	0.955882	0.804688	0.983051	0.928571	0.768362	0.967742	0.88	1	1	0.907143	0.970149	1	0.910201	0.902127
596	0.947917	1	1	1	0.926471	0.828125	0.966102	0.928571	0.762712	1	0.92	1	1	0.928571	1	1	0.91456	0.906945
597	0.947917	1	1	1	0.926471	0.796875	0.983051	0.928571	0.779661	0.967742	0.92	1	1	0.907143	0.985075	1	0.910201	0.901976
598	0.947917	1	1	1	0.941176	0.859375	0.983051	0.904762	0.774011	0.967742	0.853333	1	1	0.914286	0.955224	1	0.910201	0.902093
599	0.958333	1	1	1	0.911765	0.84375	1	0.952381	0.762712	1	0.92	1	1	0.921429	1	1	0.918919	0.911753
600	0.927083	1	1	1	0.911765	0.851562	0.966102	0.940476	0.762712	1	0.853333	1	1	0.921429	1	1	0.910201	0.902095
601	0.947917	1	1	1	0.926471	0.804688	0.966102	0.952381	0.774011	1	0.853333	1	1	0.907143	0.985075	1	0.907585	0.89922
602	0.927083	1	1	1	0.897059	0.796875	0.966102	0.952381	0.774011	1	0.853333	1	1	0.907143	1	1	0.904098	0.89539
603	0.96875	1	1	1	0.897059	0.84375	0.949153	0.928571	0.774011	0.967742	0.853333	1	1	0.9	0.985075	1	0.907585	0.899204
604	0.979167	1	1	1	0.926471	0.828125	1	0.952381	0.762712	1	0.88	1	1	0.892857	0.970149	1	0.911944	0.904049
605	0.958333	1	1	1	0.897059	0.882812	0.983051	0.916667	0.762712	1	0.933333	1	1	0.9	0.985075	1	0.916303	0.908889
606	0.958333	1	1	1	0.882353	0.835938	0.966102	0.952381	0.745763	1	0.893333	1	1	0.9	0.955224	1	0.904969	0.896441
607	0.96875	1	1	1	0.897059	0.84375	0.983051	0.964286	0.751412	1	0.893333	1	1	0.914286	0.970149	1	0.912816	0.904975
608	0.947917	1	1	1	0.852941	0.859375	1	0.916667	0.768362	0.967742	0.84	1	1	0.9	0.970149	1	0.904098	0.89539
609	0.958333	1	1	1	0.941176	0.8125	0.966102	0.916667	0.757062	0.967742	0.866667	1	1	0.935714	0.985075	1	0.908457	0.900202
610	0.96875	1	1	1	0.926471	0.835938	1	0.964286	0.751412	0.967742	0.84	1	1	0.9	0.970149	1	0.908457	0.900303
611	0.947917	1	1	1	0.911765	0.796875	0.949153	0.952381	0.774011	1	0.893333	1	1	0.9	0.985075	1	0.906713	0.89831
612	0.947917	1	1	1	0.867647	0.851562	0.983051	0.928571	0.762712	1	0.893333	1	1	0.907143	0.985075	1	0.909329	0.901179
613	0.9375	1	1	1	0.941176	0.84375	0.966102	0.952381	0.751412	1	0.84	1	1	0.892857	0.970149	1	0.904969	0.896377
614	0.96875	1	1	1	0.941176	0.835938	0.949153	0.97619	0.774011	1	0.866667	1	1	0.9	1	1	0.915432	0.907758
615	0.979167	1	1	1	0.882353	0.859375	0.966102	0.964286	0.762712	1	0.826667	1	1	0.885714	0.985075	1	0.908457	0.900286
616	0.958333	1	1	1	0.926471	0.835938	0.949153	0.97619	0.757062	0.967742	0.866667	1	1	0.9	0.985075	1	0.909329	0.901208
617	0.958333	1	1	1	0.911765	0.882812	0.983051	0.940476	0.751412	0.967742	0.853333	1	1	0.907143	0.970149	1	0.911072	0.903215
618	0.947917	1	1	1	0.911765	0.820312	0.949153	0.988095	0.774011	1	0.933333	1	1	0.928571	0.985075	1	0.918047	0.91062
619	0.96875	1	1	1	0.926471	0.859375	0.983051	0.964286	0.762712	0.967742	0.853333	1	1	0.885714	0.985075	1	0.911944	0.90405
620	0.927083	1	1	1	0.955882	0.828125	0.949153	0.952381	0.768362	1	0.88	1	1	0.9	1	1	0.910201	0.902147
621	0.96875	1	1	1	0.926471	0.828125	0.966102	0.952381	0.768362	1	0.866667	1	1	0.885714	0.985075	1	0.909329	0.901124
622	0.947917	1	1	1	0.867647	0.8125	0.949153	0.928571	0.774011	1	0.88	1	1	0.885714	1	1	0.902354	0.893449
623	0.958333	1	1	1	0.926471	0.8125	0.983051	0.988095	0.779661	1	0.853333	1	1	0.892857	0.985075	1	0.911944	0.903894
624	0.979167	1	1	1	0.911765	0.835938	1	0.916667	0.723164	1	0.866667	1	1	0.928571	0.970149	1	0.906713	0.898662
625	0.96875	1	1	1	0.926471	0.859375	0.983051	0.952381	0.785311	1	0.88	1	1	0.914286	0.985075	1	0.920663	0.913436
626	0.96875	1	1	1	0.941176	0.882812	0.983051	0.916667	0.774011	0.967742	0.933333	1	1	0.914286	0.970149	1	0.921534	0.914502
627	0.947917	1	1	1	0.882353	0.84375	0.966102	0.988095	0.757062	1	0.866667	0.954545	1	0.9	0.970149	1	0.907585	0.899313
628	0.9375	1	1	1	0.882353	0.78125	0.949153	0.940476	0.745763	0.967742	0.88	1	1	0.892857	0.970149	1	0.893636	0.884012
629	0.958333	1	1	1	0.911765	0.84375	0.949153	0.964286	0.774011	1	0.92	1	1	0.9	1	1	0.916303	0.908741
630	0.96875	1	1	1	0.911765	0.796875	0.966102	0.892857	0.779661	1	0.88	1	1	0.928571	0.970149	1	0.907585	0.899015
631	0.989583	1	1	1	0.911765	0.8125	0.966102	0.916667	0.757062	1	0.893333	1	1	0.921429	0.970149	1	0.909329	0.901108
632	0.947917	1	1	1	0.911765	0.828125	0.983051	0.964286	0.762712	1	0.893333	1	1	0.921429	0.985075	1	0.913688	0.905921
633	0.9375	1	1	1	0.882353	0.820312	0.966102	0.940476	0.768362	1	0.853333	1	1	0.885714	0.970149	1	0.90061	0.891574
634	0.947917	1	1	1	0.897059	0.84375	0.932203	0.964286	0.757062	1	0.906667	1	1	0.892857	0.970149	1	0.907585	0.899276
635	0.979167	1	1	1	0.882353	0.796875	1	0.952381	0.757062	1	0.866667	1	1	0.885714	0.985075	1	0.904098	0.895433
636	0.979167	1	1	1	0.897059	0.859375	0.949153	0.940476	0.774011	0.967742	0.906667	1	1	0.914286	1	1	0.917175	0.909792
637	0.96875	1	1	1	0.867647	0.84375	0.983051	0.952381	0.779661	1	0.893333	1	1	0.871429	0.955224	1	0.908457	0.900167
638	0.96875	1	1	1	0.882353	0.875	0.966102	0.964286	0.762712	1	0.893333	1	1	0.892857	1	1	0.915432	0.908005
639	0.958333	1	1	1	0.955882	0.84375	0.983051	0.952381	0.762712	1	0.92	1	1	0.9	0.955224	1	0.915432	0.907911
640	0.958333	1	1	1	0.882353	0.820312	0.966102	0.952381	0.768362	0.967742	0.826667	1	1	0.892857	1	1	0.903226	0.894523
641	0.958333	1	1	1	0.911765	0.859375	0.983051	0.97619	0.768362	1	0.893333	1	1	0.885714	0.970149	1	0.91456	0.90683
642	0.958333	1	1	1	0.955882	0.828125	0.966102	0.952381	0.779661	0.967742	0.893333	1	1	0.914286	0.970149	1	0.915432	0.907756
643	0.989583	1	1	1	0.867647	0.828125	1	0.928571	0.762712	0.967742	0.92	1	1	0.907143	0.985075	1	0.911944	0.903991
644	0.958333	1	1	1	0.941176	0.859375	0.949153	0.916667	0.762712	1	0.933333	1	1	0.907143	0.985075	1	0.915432	0.907932
645	0.979167	1	1	1	0.941176	0.84375	0.966102	0.892857	0.751412	0.967742	0.88	1	1	0.914286	1	1	0.910201	0.902025
646	0.96875	1	1	1	0.926471	0.820312	0.983051	0.964286	0.768362	1	0.866667	1	1	0.885714	0.985075	1	0.910201	0.90216
647	0.947917	1	1	1	0.911765	0.804688	0.949153	0.952381	0.757062	1	0.88	1	1	0.914286	0.955224	1	0.904098	0.895423
648	0.958333	1	1	1	0.955882	0.875	0.983051	0.940476	0.757062	1	0.893333	1	1	0.9	0.985075	1	0.917175	0.90992
649	0.927083	1	1	1	0.926471	0.828125	0.966102	0.916667	0.779661	1	0.906667	1	1	0.885714	0.970149	1	0.906713	0.898232
650	0.927083	1	1	1	0.897059	0.84375	0.966102	0.940476	0.774011	0.967742	0.88	1	1	0.914286	1	1	0.910201	0.902043
651	0.96875	1	1	1	0.911765	0.859375	1	0.904762	0.757062	0.967742	0.8	1	1	0.9	0.985075	1	0.904969	0.896407
652	0.947917	1	1	1	0.882353	0.835938	1	0.964286	0.740113	1	0.88	1	1	0.914286	0.985075	1	0.908457	0.900354
653	0.947917	1	1	1	0.867647	0.835938	0.983051	0.928571	0.757062	1	0.92	1	1	0.935714	0.955224	1	0.910201	0.90219
654	0.947917	1	1	1	0.926471	0.882812	0.966102	0.940476	0.751412	1	0.906667	1	1	0.907143	0.970149	1	0.91456	0.907087
655	0.979167	1	1	1	0.941176	0.804688	1	0.904762	0.768362	1	0.933333	1	1	0.935714	0.985075	1	0.917175	0.90975
656	0.989583	1	1	1	0.941176	0.828125	0.983051	0.928571	0.762712	1	0.933333	1	1	0.9	0.985075	1	0.916303	0.908882
657	0.979167	1	1	1	0.911765	0.757812	0.949153	0.952381	0.779661	1	0.893333	1	1	0.914286	0.970149	1	0.906713	0.898033
658	0.96875	1	1	1	0.882353	0.835938	0.932203	0.964286	0.774011	1	0.84	1	1	0.892857	0.955224	1	0.904969	0.896244
659	0.989583	1	1	1	0.941176	0.8125	0.966102	0.928571	0.757062	1	0.893333	1	1	0.907143	0.985075	1	0.911072	0.903055
660	0.96875	1	1	1	0.941176	0.851562	0.949153	0.952381	0.768362	0.967742	0.92	1	1	0.885714	0.985075	1	0.91456	0.907005
661	0.979167	1	1	1	0.911765	0.8125	0.966102	0.928571	0.768362	1	0.906667	1	1	0.907143	0.970149	1	0.910201	0.902174
662	0.958333	1	1	1	0.926471	0.84375	1	0.940476	0.774011	1	0.88	1	1	0.892857	0.955224	1	0.911944	0.903979
663	0.958333	1	1	1	0.970588	0.820312	0.966102	0.904762	0.774011	1	0.866667	1	1	0.885714	0.970149	1	0.906713	0.898121
664	0.947917	1	1	1	0.911765	0.835938	1	0.97619	0.774011	0.967742	0.933333	1	1	0.914286	0.985075	1	0.918919	0.911616
665	0.96875	1	1	1	0.911765	0.84375	0.966102	0.952381	0.751412	1	0.866667	1	1	0.892857	0.985075	1	0.908457	0.90033
666	0.958333	1	1	1	0.911765	0.851562	0.966102	0.952381	0.768362	0.967742	0.866667	1	1	0.907143	1	1	0.912816	0.905071
667	0.958333	1	1	1	0.911765	0.835938	0.949153	0.904762	0.762712	0.967742	0.893333	1	1	0.892857	0.955224	1	0.903226	0.894463
668	0.96875	1	1	1	0.926471	0.84375	1	0.928571	0.785311	0.935484	0.853333	1	1	0.892857	0.985075	1	0.911944	0.903941
669	0.9375	1	1	1	0.955882	0.859375	0.983051	0.904762	0.785311	1	0.92	1	1	0.892857	1	1	0.917175	0.909603
670	0.958333	1	1	1	0.926471	0.789062	1	0.940476	0.779661	1	0.853333	1	1	0.892857	0.985075	1	0.906713	0.898236
671	0.979167	1	1	1	0.926471	0.820312	0.949153	0.952381	0.757062	1	0.866667	1	1	0.892857	0.985075	1	0.907585	0.899313
672	0.979167	1	1	1	0.941176	0.796875	1	0.928571	0.762712	1	0.893333	1	1	0.907143	0.985075	1	0.911072	0.903137
673	0.9375	1	1	1	0.926471	0.828125	0.966102	0.928571	0.751412	1	0.853333	1	1	0.921429	0.985075	1	0.905841	0.897368
674	0.958333	1	1	1	0.970588	0.804688	0.932203	0.928571	0.768362	0.967742	0.933333	1	1	0.914286	0.985075	1	0.911944	0.903853
675	0.947917	1	1	1	0.970588	0.828125	0.983051	0.940476	0.762712	1	0.96	1	1	0.9	1	1	0.918047	0.910694
676	0.958333	1	1	1	0.955882	0.828125	0.932203	0.952381	0.757062	1	0.946667	1	1	0.9	0.970149	1	0.912816	0.905088
677	0.947917	1	1	1	0.955882	0.835938	0.983051	0.916667	0.757062	1	0.866667	1	1	0.892857	0.970149	1	0.906713	0.898331
678	0.96875	1	1	1	0.926471	0.8125	1	0.952381	0.740113	1	0.853333	1	1	0.885714	0.970149	1	0.903226	0.894714
679	0.947917	1	1	1	0.941176	0.835938	0.949153	0.952381	0.757062	1	0.893333	1	1	0.907143	1	1	0.911944	0.904037
680	0.958333	1	1	1	0.897059	0.78125	0.966102	0.952381	0.774011	1	0.906667	1	1	0.942857	0.970149	1	0.911072	0.902945
681	0.958333	1	1	1	0.941176	0.828125	0.949153	0.940476	0.768362	1	0.88	1	1	0.9	0.970149	1	0.909329	0.901102
682	0.947917	1	1	1	0.926471	0.851562	0.983051	0.916667	0.762712	1	0.946667	1	1	0.885714	0.985075	1	0.912816	0.905016
683	0.9375	1	1	1	0.926471	0.835938	0.966102	0.952381	0.768362	1	0.92	1	1	0.892857	0.940299	1	0.909329	0.901219
684	0.958333	1	1	1	0.911765	0.828125	0.966102	0.928571	0.768362	1	0.866667	1	1	0.907143	0.970149	1	0.907585	0.899104
685	0.979167	1	1	1	0.911765	0.820312	0.949153	0.928571	0.768362	0.967742	0.853333	1	1	0.907143	1	1	0.907585	0.899255
686	0.958333	1	1	1	0.926471	0.867188	0.966102	0.952381	0.768362	1	0.866667	1	1	0.928571	0.955224	1	0.916303	0.908773
687	0.989583	1	1	1	0.970588	0.835938	0.966102	0.940476	0.751412	1	0.92	1	1	0.907143	1	1	0.918047	0.910789
688	0.9375	1	1	1	0.897059	0.828125	0.915254	0.964286	0.757062	1	0.893333	1	1	0.921429	1	1	0.908457	0.900316
689	0.9375	1	1	1	0.955882	0.804688	0.966102	0.928571	0.757062	1	0.92	1	1	0.9	0.985075	1	0.907585	0.899301
690	0.979167	1	1	1	0.882353	0.835938	1	0.97619	0.768362	1	0.906667	1	1	0.892857	0.985075	1	0.915432	0.907878
691	0.958333	1	1	1	0.911765	0.804688	1	0.904762	0.762712	0.967742	0.92	1	1	0.892857	1	1	0.906713	0.898355
692	0.96875	1	1	1	0.941176	0.8125	1	0.952381	0.751412	1	0.906667	1	1	0.892857	0.970149	1	0.910201	0.902024
693	0.96875	1	1	1	0.926471	0.796875	0.983051	0.988095	0.757062	1	0.893333	1	1	0.892857	0.985075	1	0.910201	0.902093
694	0.96875	1	1	1	0.941176	0.804688	0.966102	0.940476	0.757062	1	0.826667	1	1	0.914286	0.985075	1	0.905841	0.897282
695	0.96875	1	1	1	0.926471	0.789062	0.966102	0.940476	0.768362	1	0.906667	1	1	0.885714	0.970149	1	0.905841	0.897207
696	0.947917	1	1	1	0.897059	0.835938	0.966102	0.952381	0.774011	1	0.813333	1	1	0.892857	0.985075	1	0.904969	0.896433
697	0.96875	1	1	1	0.926471	0.835938	0.966102	0.964286	0.751412	1	0.933333	1	1	0.928571	0.970149	1	0.917175	0.909732
698	0.958333	1	1	1	0.867647	0.828125	0.966102	0.916667	0.751412	1	0.906667	1	1	0.914286	0.985075	1	0.905841	0.897195
699	0.96875	1	1	1	0.882353	0.859375	0.966102	0.940476	0.740113	1	0.88	1	1	0.892857	0.985075	1	0.906713	0.89855
700	0.958333	1	1	1	0.897059	0.835938	0.949153	0.940476	0.762712	1	0.92	1	1	0.9	0.955224	1	0.908457	0.900164
701	0.958333	1	1	1	0.941176	0.828125	0.932203	0.928571	0.762712	1	0.893333	1	1	0.892857	0.985075	1	0.907585	0.899137
702	0.927083	1	1	1	0.867647	0.851562	0.949153	0.964286	0.762712	1	0.933333	1	1	0.892857	0.970149	1	0.908457	0.900297
703	0.979167	1	1	1	0.897059	0.8125	0.983051	0.964286	0.757062	1	0.866667	1	1	0.914286	1	1	0.911072	0.903191
704	0.947917	1	1	1	0.911765	0.828125	0.966102	0.904762	0.762712	0.967742	0.88	1	1	0.914286	0.985075	1	0.905841	0.897381
705	0.979167	1	1	1	0.838235	0.851562	0.966102	0.952381	0.762712	1	0.84	1	1	0.928571	0.955224	1	0.908457	0.900123
706	0.96875	1	1	1	0.897059	0.859375	0.966102	0.904762	0.757062	1	0.906667	1	1	0.914286	0.985075	1	0.911944	0.904058
707	0.96875	1	1	1	0.911765	0.851562	0.932203	0.940476	0.745763	1	0.893333	1	1	0.892857	0.970149	1	0.906713	0.898451
708	0.96875	1	1	1	0.897059	0.804688	0.983051	0.940476	0.774011	1	0.866667	1	1	0.907143	0.970149	1	0.907585	0.899046
709	0.927083	1	1	1	0.897059	0.796875	0.983051	0.904762	0.757062	0.967742	0.84	1	1	0.935714	0.985075	1	0.899738	0.890527
710	0.958333	1	1	1	0.897059	0.820312	0.983051	0.904762	0.774011	1	0.88	1	1	0.907143	0.985075	1	0.907585	0.899169
711	0.958333	1	1	1	0.941176	0.851562	1	0.964286	0.757062	1	0.893333	1	1	0.914286	0.985075	1	0.918047	0.910785
712	0.96875	1	1	1	0.985294	0.804688	0.983051	0.940476	0.757062	1	0.88	1	1	0.914286	0.985075	1	0.912816	0.904913
713	0.958333	1	1	1	0.926471	0.820312	0.966102	0.916667	0.768362	1	0.88	1	1	0.9	0.985075	1	0.907585	0.89935
714	0.979167	1	1	1	0.941176	0.820312	0.966102	0.928571	0.757062	0.967742	0.906667	1	1	0.885714	0.970149	1	0.907585	0.899289
715	0.958333	1	1	1	0.926471	0.867188	0.983051	0.988095	0.745763	0.967742	0.946667	1	1	0.907143	1	1	0.920663	0.913888
716	0.979167	1	1	1	0.955882	0.820312	0.932203	0.904762	0.751412	1	0.866667	1	1	0.885714	1	1	0.904098	0.895562
717	0.96875	1	1	1	0.897059	0.773438	0.983051	0.916667	0.768362	0.935484	0.933333	1	1	0.9	0.970149	1	0.903226	0.894485
718	0.958333	1	1	1	0.911765	0.835938	0.983051	0.952381	0.762712	0.967742	0.906667	1	1	0.9	0.970149	1	0.911072	0.903078
719	0.958333	1	1	1	0.926471	0.828125	1	0.940476	0.757062	1	0.906667	1	1	0.9	0.985075	1	0.911944	0.903988
720	0.9375	1	1	1	0.941176	0.835938	0.949153	0.97619	0.779661	0.967742	0.853333	1	1	0.914286	0.985075	1	0.912816	0.904826
721	0.979167	1	1	1	0.941176	0.84375	1	0.964286	0.751412	1	0.866667	1	1	0.9	0.970149	1	0.913688	0.906177
722	0.947917	1	1	1	0.926471	0.8125	0.983051	0.940476	0.762712	0.967742	0.88	1	1	0.885714	0.970149	1	0.904098	0.895333
723	0.96875	1	1	1	0.926471	0.851562	0.966102	0.964286	0.779661	1	0.906667	1	1	0.928571	0.985075	1	0.922406	0.915354
724	0.958333	1	1	1	0.941176	0.804688	0.966102	0.964286	0.762712	1	0.933333	1	1	0.921429	0.970149	1	0.91456	0.906839
725	0.947917	1	1	1	0.926471	0.8125	0.966102	0.964286	0.762712	0.967742	0.853333	1	1	0.885714	0.985075	1	0.904098	0.895455
726	0.958333	1	1	1	0.926471	0.789062	0.966102	0.952381	0.762712	0.967742	0.84	1	1	0.928571	0.985075	1	0.905841	0.897336
727	0.947917	1	1	1	0.867647	0.828125	0.983051	0.928571	0.768362	0.967742	0.92	1	1	0.907143	0.985075	1	0.908457	0.900067
728	0.958333	1	1	1	0.926471	0.851562	1	0.904762	0.762712	0.967742	0.893333	1	1	0.885714	0.985075	1	0.909329	0.90128
729	0.958333	1	1	1	0.897059	0.820312	0.983051	0.916667	0.779661	0.967742	0.906667	1	1	0.921429	0.985075	1	0.911944	0.903892
730	0.979167	1	1	1	0.867647	0.882812	0.949153	0.928571	0.740113	1	0.933333	1	1	0.892857	0.955224	1	0.909329	0.901383
731	0.947917	1	1	1	0.897059	0.828125	0.983051	0.928571	0.785311	1	0.92	1	1	0.878571	0.985075	1	0.910201	0.901991
732	0.927083	1	1	1	0.941176	0.796875	1	0.940476	0.762712	1	0.88	1	1	0.907143	0.970149	1	0.905841	0.897324
733	0.96875	1	1	1	0.897059	0.8125	0.966102	0.904762	0.757062	1	0.826667	1	1	0.871429	0.970149	1	0.895379	0.885834
734	0.9375	1	1	1	0.955882	0.804688	0.966102	0.97619	0.757062	1	0.893333	1	1	0.907143	0.985075	1	0.910201	0.902149
735	0.958333	1	1	1	0.911765	0.828125	0.966102	0.952381	0.745763	1	0.84	1	1	0.907143	0.970149	1	0.904098	0.895625
736	0.96875	1	1	1	0.926471	0.828125	0.949153	0.952381	0.774011	0.935484	0.906667	1	1	0.892857	0.970149	1	0.910201	0.902095
737	0.958333	1	1	1	0.897059	0.8125	1	0.964286	0.774011	1	0.92	1	1	0.892857	0.985075	1	0.912816	0.905038
738	0.96875	1	1	1	0.882353	0.867188	0.932203	0.904762	0.757062	1	0.88	1	1	0.921429	0.940299	1	0.906713	0.898364
739	0.96875	1	1	1	0.926471	0.820312	1	0.904762	0.751412	1	0.906667	1	1	0.892857	0.955224	1	0.905841	0.897464
740	0.96875	1	1	1	0.897059	0.820312	0.949153	0.880952	0.762712	1	0.866667	1	1	0.9	0.970149	1	0.90061	0.891552
741	0.947917	1	1	1	0.970588	0.8125	0.966102	0.940476	0.762712	1	0.84	1	1	0.885714	0.970149	1	0.904098	0.8954
742	0.947917	1	1	1	0.911765	0.835938	0.966102	0.928571	0.757062	0.967742	0.826667	1	1	0.914286	0.970149	1	0.903226	0.894495
743	0.979167	1	1	1	0.882353	0.867188	1	0.964286	0.745763	1	0.92	1	1	0.914286	0.970149	1	0.917175	0.909897
744	0.958333	1	1	1	0.970588	0.78125	1	0.928571	0.757062	0.967742	0.92	1	1	0.914286	0.970149	1	0.909329	0.901135
745	0.958333	1	1	1	0.985294	0.773438	0.983051	0.940476	0.762712	0.967742	0.906667	1	1	0.9	1	1	0.909329	0.901046
746	0.958333	1	1	1	0.852941	0.875	0.966102	0.964286	0.768362	0.967742	0.946667	1	1	0.907143	1	1	0.918047	0.910881
747	0.958333	1	1	1	0.926471	0.859375	1	0.964286	0.768362	1	0.92	1	1	0.914286	0.985075	1	0.921534	0.914514
748	0.916667	1	1	1	0.911765	0.820312	0.949153	0.904762	0.768362	0.967742	0.906667	1	1	0.9	0.955224	1	0.90061	0.891526
749	0.96875	1	1	1	0.941176	0.890625	0.983051	0.97619	0.774011	0.935484	0.84	1	1	0.885714	0.970149	1	0.916303	0.90881
750	0.9375	1	1	1	0.897059	0.859375	0.949153	0.928571	0.762712	0.967742	0.933333	1	1	0.885714	0.985075	1	0.908457	0.900177
751	0.989583	1	1	1	0.970588	0.8125	0.966102	0.928571	0.762712	1	0.946667	1	1	0.914286	1	1	0.918919	0.911624
752	0.979167	1	1	1	0.911765	0.867188	0.949153	0.97619	0.757062	1	0.906667	1	1	0.9	0.970149	1	0.916303	0.908846
753	0.947917	1	1	1	0.955882	0.789062	0.983051	0.940476	0.774011	0.967742	0.866667	1	1	0.921429	0.970149	1	0.908457	0.900111
754	0.947917	1	1	1	0.926471	0.851562	0.983051	0.940476	0.768362	1	0.92	1	1	0.914286	0.970149	1	0.916303	0.908614
755	0.958333	1	1	1	0.897059	0.828125	0.949153	0.964286	0.757062	0.967742	0.933333	1	1	0.914286	1	1	0.912816	0.904934
756	0.958333	1	1	1	0.955882	0.796875	1	0.940476	0.751412	1	0.906667	1	1	0.878571	1	1	0.907585	0.899328
757	0.96875	1	1	1	0.911765	0.796875	0.949153	0.964286	0.762712	1	0.906667	1	1	0.907143	0.985075	1	0.909329	0.901226
758	0.958333	1	1	1	0.926471	0.851562	0.983051	0.952381	0.745763	1	0.853333	1	1	0.9	0.940299	1	0.906713	0.898426
759	0.958333	1	1	1	0.941176	0.859375	0.966102	0.952381	0.779661	0.935484	0.893333	1	1	0.907143	0.970149	1	0.916303	0.908689
760	0.947917	1	1	1	0.882353	0.789062	0.966102	0.940476	0.768362	0.967742	0.88	1	1	0.914286	0.985075	1	0.903226	0.894271
761	0.947917	1	1	1	0.882353	0.851562	0.949153	0.952381	0.762712	1	0.88	1	1	0.914286	0.970149	1	0.909329	0.901189
762	0.96875	1	1	1	0.955882	0.8125	0.949153	0.940476	0.757062	1	0.92	1	1	0.914286	0.970149	1	0.911944	0.90391
763	0.96875	1	1	1	0.926471	0.867188	0.983051	0.952381	0.779661	1	0.906667	1	1	0.885714	0.985075	1	0.918919	0.911592
764	0.96875	1	1	1	0.867647	0.8125	0.966102	0.964286	0.745763	1	0.946667	1	1	0.9	0.985075	1	0.908457	0.900274
765	0.989583	1	1	1	0.882353	0.796875	0.966102	0.952381	0.762712	1	0.92	1	1	0.892857	0.985075	1	0.908457	0.900254
766	0.958333	1	1	1	0.911765	0.8125	0.949153	0.928571	0.762712	1	0.906667	1	1	0.9	0.970149	1	0.905841	0.897319
767	0.96875	1	1	1	0.926471	0.890625	0.983051	0.940476	0.762712	0.967742	0.933333	1	1	0.914286	0.985075	1	0.922406	0.915473
768	0.958333	1	1	1	0.882353	0.851562	0.966102	0.928571	0.762712	0.967742	0.893333	1	1	0.907143	0.970149	1	0.908457	0.900142
769	0.9375	1	1	1	0.926471	0.835938	0.983051	0.952381	0.762712	1	0.853333	1	1	0.9	0.955224	1	0.906713	0.898205
770	0.96875	1	1	1	0.911765	0.851562	0.932203	0.904762	0.757062	1	0.88	1	1	0.9	0.970149	1	0.905841	0.897452
771	0.989583	1	1	1	0.897059	0.835938	0.949153	0.97619	0.774011	1	0.92	1	1	0.9	0.955224	1	0.915432	0.907889
772	0.947917	1	1	1	0.882353	0.835938	1	0.928571	0.774011	1	0.866667	1	1	0.892857	0.970149	1	0.906713	0.898226
773	0.96875	1	1	1	0.852941	0.859375	0.966102	0.916667	0.751412	0.967742	0.866667	1	1	0.885714	0.985075	1	0.902354	0.893509
774	0.958333	1	1	1	0.897059	0.835938	0.983051	0.940476	0.762712	1	0.96	1	1	0.892857	0.970149	1	0.912816	0.904987
775	0.979167	1	1	1	0.955882	0.851562	0.983051	0.928571	0.774011	1	0.866667	1	1	0.921429	1	1	0.919791	0.912617
776	0.958333	1	1	1	0.897059	0.804688	0.966102	0.928571	0.779661	1	0.906667	1	1	0.914286	0.955224	1	0.908457	0.900004
777	0.9375	1	1	1	0.911765	0.851562	0.949153	0.964286	0.785311	1	0.88	1	1	0.921429	0.970149	1	0.915432	0.907702
778	0.947917	1	1	1	0.897059	0.84375	0.983051	0.928571	0.757062	1	0.88	1	1	0.9	0.955224	1	0.905841	0.897224
779	0.947917	1	1	1	0.926471	0.859375	0.966102	0.952381	0.745763	1	0.92	1	1	0.9	0.955224	1	0.911072	0.903159
780	0.989583	1	1	1	0.882353	0.804688	0.983051	0.904762	0.762712	1	0.866667	1	1	0.914286	0.970149	1	0.904969	0.896334
781	0.958333	1	1	1	0.926471	0.851562	1	0.916667	0.779661	1	0.946667	1	1	0.907143	0.985075	1	0.919791	0.912452
782	0.927083	1	1	1	0.867647	0.84375	0.966102	0.964286	0.785311	1	0.88	1	1	0.907143	0.970149	1	0.910201	0.901955
783	0.947917	1	1	1	0.867647	0.835938	1	0.97619	0.774011	1	0.893333	1	1	0.928571	0.970149	1	0.915432	0.907709
784	0.947917	1	1	1	0.926471	0.859375	0.966102	0.952381	0.762712	0.967742	0.893333	1	1	0.907143	0.970149	1	0.912816	0.904955
785	0.979167	1	1	1	0.911765	0.867188	1	0.916667	0.768362	1	0.853333	1	1	0.928571	0.970149	1	0.916303	0.908812
786	0.96875	1	1	1	0.897059	0.851562	0.983051	0.940476	0.779661	1	0.88	1	1	0.907143	0.985075	1	0.915432	0.907795
787	0.979167	1	1	1	0.911765	0.835938	0.966102	0.940476	0.779661	1	0.906667	1	1	0.9	0.955224	1	0.913688	0.90595
788	0.958333	1	1	1	0.970588	0.828125	0.949153	0.904762	0.774011	1	0.893333	1	1	0.928571	0.970149	1	0.913688	0.90588
789	0.9375	1	1	1	0.897059	0.859375	0.932203	0.940476	0.762712	1	0.92	1	1	0.914286	0.985075	1	0.911944	0.904097
790	0.947917	1	1	1	0.955882	0.84375	0.966102	0.964286	0.757062	1	0.92	1	1	0.9	0.955224	1	0.913688	0.905912
791	0.9375	1	1	1	0.882353	0.851562	0.983051	0.928571	0.779661	1	0.933333	1	1	0.907143	0.985075	1	0.91456	0.906842
792	0.96875	1	1	1	0.926471	0.828125	0.983051	0.928571	0.774011	1	0.92	1	1	0.907143	0.985075	1	0.915432	0.907774
793	0.979167	1	1	1	0.941176	0.875	0.966102	0.952381	0.774011	1	0.906667	1	1	0.907143	0.985075	1	0.922406	0.915517
794	0.9375	1	1	1	0.941176	0.867188	0.983051	0.952381	0.768362	1	0.88	1	1	0.907143	0.985075	1	0.916303	0.908898
795	0.927083	1	1	1	0.955882	0.835938	0.983051	0.928571	0.779661	1	0.933333	1	1	0.914286	0.955224	1	0.915432	0.907709
796	0.979167	1	1	1	0.955882	0.851562	0.983051	0.988095	0.762712	0.967742	0.88	1	1	0.9	0.985075	1	0.918919	0.911712
797	0.96875	1	1	1	0.926471	0.851562	0.966102	0.940476	0.762712	1	0.866667	1	1	0.914286	1	1	0.91456	0.906921
798	0.96875	1	1	1	0.911765	0.828125	0.983051	0.928571	0.762712	0.967742	0.933333	1	1	0.9	0.985075	1	0.911944	0.904072
799	0.989583	1	1	1	0.852941	0.859375	0.966102	0.928571	0.762712	0.967742	0.92	1	1	0.921429	0.985075	1	0.91456	0.906999
800	0.947917	1	1	1	0.882353	0.851562	0.966102	0.928571	0.745763	1	0.88	1	1	0.914286	0.955224	1	0.904969	0.896317
801	0.958333	1	1	1	0.867647	0.851562	0.983051	0.904762	0.779661	1	0.853333	1	1	0.907143	0.970149	1	0.907585	0.899207
802	0.989583	1	1	1	0.882353	0.84375	0.983051	0.952381	0.762712	1	0.893333	1	1	0.921429	0.985075	1	0.916303	0.908866
803	0.958333	1	1	1	0.955882	0.867188	0.983051	0.964286	0.757062	1	0.906667	1	1	0.892857	0.985075	1	0.918047	0.910784
804	0.958333	1	1	1	0.911765	0.828125	1	0.940476	0.757062	1	0.906667	1	1	0.935714	0.970149	1	0.91456	0.906938
805	0.916667	1	1	1	0.882353	0.859375	0.949153	0.964286	0.757062	1	0.92	1	1	0.892857	0.985075	1	0.908457	0.900235
806	0.96875	1	1	1	0.911765	0.835938	0.983051	0.952381	0.762712	0.967742	0.906667	1	1	0.921429	0.955224	1	0.913688	0.905855
807	0.958333	1	1	1	0.897059	0.851562	0.966102	0.916667	0.779661	1	0.88	1	1	0.914286	0.970149	1	0.911944	0.903905
808	0.96875	1	1	1	0.882353	0.828125	1	0.916667	0.762712	1	0.866667	1	1	0.885714	0.955224	1	0.903226	0.894432
809	0.96875	1	1	1	0.926471	0.851562	0.966102	0.928571	0.762712	0.967742	0.906667	1	1	0.9	1	1	0.913688	0.906016
810	0.96875	1	1	1	0.882353	0.867188	0.983051	0.904762	0.768362	0.967742	0.92	1	1	0.914286	0.970149	1	0.913688	0.905962
811	0.947917	1	1	1	0.926471	0.851562	0.983051	0.904762	0.768362	1	0.88	1	1	0.892857	0.985075	1	0.909329	0.90105
812	0.96875	1	1	1	0.882353	0.820312	0.966102	0.952381	0.762712	1	0.853333	1	1	0.9	0.955224	1	0.904098	0.895375
813	0.958333	1	1	1	0.911765	0.8125	0.966102	0.928571	0.768362	0.967742	0.866667	1	1	0.9	0.985075	1	0.904969	0.896328
814	0.96875	1	1	1	0.911765	0.851562	0.983051	0.940476	0.757062	1	0.933333	1	1	0.914286	0.985075	1	0.917175	0.909734
815	0.96875	1	1	1	0.867647	0.851562	0.966102	0.904762	0.757062	1	0.88	1	1	0.892857	0.970149	1	0.904098	0.895491
816	0.947917	1	1	1	0.941176	0.828125	0.983051	0.916667	0.774011	1	0.906667	1	1	0.892857	0.970149	1	0.910201	0.902087
817	0.9375	1	1	1	0.941176	0.851562	1	0.940476	0.768362	0.967742	0.893333	1	1	0.935714	0.985075	1	0.918047	0.910702
818	0.947917	1	1	1	0.926471	0.851562	0.966102	0.952381	0.762712	1	0.906667	1	1	0.9	0.970149	1	0.912816	0.904922
819	0.958333	1	1	1	0.941176	0.835938	0.966102	0.964286	0.757062	1	0.893333	1	1	0.907143	0.970149	1	0.912816	0.905092
820	0.9375	1	1	1	0.882353	0.828125	0.966102	0.904762	0.768362	1	0.906667	1	1	0.892857	0.955224	1	0.902354	0.893424
821	0.979167	1	1	1	0.911765	0.867188	0.983051	0.940476	0.79096	1	0.96	1	1	0.907143	0.970149	1	0.925022	0.918336
822	0.96875	1	1	1	0.911765	0.890625	0.966102	0.928571	0.762712	1	0.92	1	1	0.9	0.985075	1	0.918047	0.910874
823	0.979167	1	1	1	0.897059	0.804688	0.983051	0.940476	0.757062	1	0.853333	1	1	0.914286	0.955224	1	0.904969	0.896408
824	0.958333	1	1	1	0.926471	0.820312	0.966102	0.928571	0.762712	0.967742	0.88	1	1	0.892857	0.940299	1	0.903226	0.894471
825	0.9375	1	1	1	0.911765	0.835938	0.949153	0.952381	0.79096	1	0.84	1	1	0.914286	0.985075	1	0.911072	0.902897
826	0.958333	1	1	1	0.867647	0.890625	0.949153	0.97619	0.768362	1	0.853333	1	1	0.907143	0.985075	1	0.91456	0.906965
827	0.958333	1	1	1	0.882353	0.84375	0.949153	0.964286	0.762712	1	0.826667	1	1	0.885714	1	1	0.904969	0.896479
828	0.96875	1	1	1	0.926471	0.851562	0.983051	0.97619	0.80791	0.967742	0.906667	1	1	0.9	0.985075	1	0.92415	0.917173
829	0.979167	1	1	1	0.955882	0.882812	0.983051	0.964286	0.779661	1	0.946667	1	1	0.914286	0.985075	1	0.930253	0.924036
830	0.947917	1	1	1	0.867647	0.851562	0.932203	0.964286	0.774011	1	0.906667	1	1	0.9	0.955224	1	0.909329	0.901059
831	0.979167	1	1	1	0.823529	0.851562	0.966102	0.952381	0.768362	1	0.92	1	1	0.914286	0.970149	1	0.912816	0.904931
832	0.916667	1	1	1	0.897059	0.804688	0.966102	0.97619	0.762712	1	0.92	1	1	0.9	0.970149	1	0.905841	0.897266
833	0.96875	1	1	1	0.926471	0.84375	0.966102	0.904762	0.768362	1	0.96	1	1	0.914286	0.985075	1	0.917175	0.909804
834	0.96875	1	1	1	0.955882	0.851562	0.966102	0.928571	0.757062	1	0.88	1	1	0.921429	0.985075	1	0.915432	0.907909
835	0.947917	1	1	1	0.926471	0.820312	0.983051	0.904762	0.774011	0.967742	0.866667	1	1	0.921429	0.970149	1	0.907585	0.899159
836	0.96875	1	1	1	0.941176	0.84375	0.983051	0.964286	0.774011	0.967742	0.826667	1	1	0.914286	0.985075	1	0.91456	0.906974
837	0.96875	1	1	1	0.897059	0.867188	0.983051	0.97619	0.779661	1	0.88	1	1	0.878571	0.970149	1	0.915432	0.907835
838	0.96875	1	1	1	0.897059	0.828125	0.966102	0.97619	0.774011	1	0.906667	1	1	0.9	0.970149	1	0.913688	0.905886
839	0.947917	1	1	1	0.911765	0.875	0.966102	0.904762	0.779661	1	0.946667	1	1	0.935714	0.985075	1	0.921534	0.914522
840	0.9375	1	1	1	0.911765	0.859375	0.949153	0.964286	0.785311	1	0.853333	1	1	0.921429	0.970149	1	0.91456	0.906787
841	0.979167	1	1	1	0.838235	0.835938	0.983051	0.952381	0.757062	1	0.88	1	1	0.914286	0.985075	1	0.909329	0.901191
842	0.958333	1	1	1	0.897059	0.867188	0.966102	0.964286	0.774011	0.967742	0.933333	1	1	0.907143	0.940299	1	0.916303	0.908706
843	0.947917	1	1	1	0.897059	0.898438	0.983051	0.940476	0.762712	0.967742	0.866667	1	1	0.907143	0.985075	1	0.91456	0.906997
844	0.96875	1	1	1	0.911765	0.851562	0.966102	0.952381	0.762712	1	0.933333	1	1	0.878571	0.970149	1	0.912816	0.905144
845	0.96875	1	1	1	0.867647	0.835938	0.966102	0.940476	0.740113	1	0.893333	1	1	0.892857	1	1	0.904969	0.896536
846	0.979167	1	1	1	0.911765	0.84375	1	0.928571	0.751412	1	0.866667	1	1	0.9	0.970149	1	0.909329	0.901257
847	0.958333	1	1	1	0.882353	0.835938	1	0.952381	0.774011	1	0.906667	1	1	0.892857	0.970149	1	0.911944	0.90402
848	0.947917	1	1	1	0.941176	0.820312	0.949153	0.964286	0.740113	0.935484	0.893333	1	1	0.907143	0.970149	1	0.904969	0.896438
849	0.958333	1	1	1	0.926471	0.835938	0.983051	0.964286	0.762712	1	0.906667	1	1	0.921429	0.970149	1	0.916303	0.908855
850	0.958333	1	1	1	0.955882	0.84375	0.983051	0.928571	0.768362	1	0.88	1	1	0.892857	0.985075	1	0.912816	0.904942
851	0.9375	1	1	1	0.882353	0.820312	0.966102	0.97619	0.768362	1	0.826667	1	1	0.878571	0.985075	1	0.901482	0.892469
852	0.979167	1	1	1	0.941176	0.851562	0.966102	0.892857	0.762712	0.967742	0.826667	1	1	0.892857	1	1	0.906713	0.898353
853	0.947917	1	1	1	0.882353	0.851562	0.983051	0.964286	0.779661	0.967742	0.96	1	1	0.892857	0.970149	1	0.916303	0.908781
854	0.958333	1	1	1	0.852941	0.828125	1	1	0.785311	0.967742	0.946667	1	1	0.9	0.955224	1	0.916303	0.908666
855	0.958333	1	1	1	0.911765	0.859375	0.966102	0.904762	0.745763	0.967742	0.893333	1	1	0.921429	0.955224	1	0.907585	0.899328
856	0.958333	1	1	1	0.852941	0.828125	0.966102	0.904762	0.757062	1	0.853333	1	1	0.907143	0.985075	1	0.90061	0.891605
857	0.958333	1	1	1	0.867647	0.851562	0.983051	0.97619	0.762712	0.967742	0.92	1	1	0.885714	0.970149	1	0.911072	0.903181
858	0.96875	1	1	1	0.867647	0.867188	0.983051	0.928571	0.757062	0.935484	0.893333	1	1	0.885714	1	1	0.908457	0.900241
859	0.96875	1	1	1	0.897059	0.851562	0.966102	0.940476	0.751412	0.967742	0.84	1	1	0.885714	0.970149	1	0.903226	0.894589
860	0.96875	1	1	1	0.911765	0.835938	0.966102	0.904762	0.774011	0.967742	0.893333	1	1	0.914286	0.955224	1	0.909329	0.901147
861	0.96875	1	1	1	0.970588	0.882812	1	0.97619	0.762712	1	0.893333	1	1	0.885714	0.985075	1	0.922406	0.915665
862	0.947917	1	1	1	0.926471	0.859375	0.983051	0.940476	0.779661	1	0.906667	1	1	0.921429	0.970149	1	0.918919	0.911658
863	0.96875	1	1	1	0.882353	0.835938	0.966102	0.952381	0.774011	1	0.866667	1	1	0.907143	0.940299	1	0.908457	0.900074
864	0.979167	1	1	1	0.867647	0.804688	1	0.964286	0.774011	1	0.906667	1	1	0.907143	0.955224	1	0.911072	0.903007
865	0.958333	1	1	1	0.941176	0.835938	0.949153	0.916667	0.762712	0.967742	0.92	1	1	0.921429	0.985075	1	0.912816	0.904887
866	0.96875	1	1	1	0.911765	0.835938	0.983051	0.928571	0.768362	1	0.88	1	1	0.935714	0.970149	1	0.91456	0.906803
867	0.96875	1	1	1	0.926471	0.882812	0.966102	0.928571	0.751412	1	0.92	1	1	0.9	0.985075	1	0.916303	0.908906
868	0.927083	1	1	1	0.852941	0.859375	0.983051	0.916667	0.757062	1	0.906667	1	1	0.907143	1	1	0.907585	0.899343
869	0.96875	1	1	1	0.926471	0.828125	0.949153	0.940476	0.774011	1	0.933333	1	1	0.9	0.970149	1	0.913688	0.905924
870	0.916667	1	1	1	0.911765	0.867188	0.949153	0.940476	0.774011	1	0.853333	1	1	0.9	0.970149	1	0.907585	0.899221
871	0.958333	1	1	1	0.970588	0.804688	0.966102	0.952381	0.762712	1	0.893333	1	1	0.892857	0.955224	1	0.908457	0.900346
872	0.979167	1	1	1	0.897059	0.84375	0.966102	0.916667	0.774011	1	0.92	1	1	0.914286	0.955224	1	0.913688	0.90579
873	0.947917	1	1	1	0.838235	0.859375	0.949153	0.940476	0.762712	0.967742	0.92	1	1	0.885714	0.955224	1	0.904098	0.895521
874	0.958333	1	1	1	0.941176	0.867188	0.966102	0.928571	0.774011	0.967742	0.933333	1	1	0.921429	0.970149	1	0.919791	0.912617
875	0.96875	1	1	1	0.897059	0.84375	0.966102	0.964286	0.774011	0.967742	0.866667	1	1	0.9	0.970149	1	0.911072	0.902936
876	0.96875	1	1	1	0.911765	0.859375	0.983051	0.97619	0.774011	1	0.84	1	1	0.907143	0.985075	1	0.916303	0.908792
877	0.947917	1	1	1	0.882353	0.804688	0.966102	0.928571	0.757062	1	0.946667	1	1	0.9	0.970149	1	0.904969	0.896387
878	0.96875	1	1	1	0.926471	0.84375	0.983051	0.952381	0.745763	1	0.92	1	1	0.914286	0.985075	1	0.915432	0.907904
879	0.958333	1	1	1	0.867647	0.851562	0.949153	0.904762	0.779661	1	0.906667	1	1	0.907143	0.985075	1	0.910201	0.902026
880	0.947917	1	1	1	0.911765	0.851562	1	0.97619	0.768362	0.967742	0.893333	1	1	0.914286	0.970149	1	0.916303	0.908718
881	0.958333	1	1	1	0.926471	0.875	1	0.940476	0.762712	1	0.866667	1	1	0.928571	0.985075	1	0.918919	0.911772
882	0.96875	1	1	1	0.882353	0.84375	0.966102	0.952381	0.785311	1	0.893333	1	1	0.907143	0.970149	1	0.91456	0.906869
883	0.958333	1	1	1	0.926471	0.84375	0.966102	0.964286	0.779661	1	0.88	1	1	0.9	0.970149	1	0.91456	0.906827
884	0.96875	1	1	1	0.970588	0.90625	0.983051	0.952381	0.762712	1	0.906667	1	1	0.885714	0.970149	1	0.922406	0.915626
885	0.947917	1	1	1	0.882353	0.851562	0.966102	0.952381	0.751412	0.967742	0.853333	1	1	0.9	1	1	0.905841	0.897384
886	0.96875	1	1	1	0.867647	0.828125	0.983051	0.964286	0.774011	1	0.906667	1	1	0.892857	0.985075	1	0.911944	0.904034
887	0.958333	1	1	1	0.911765	0.828125	1	0.928571	0.774011	1	0.893333	1	1	0.907143	0.970149	1	0.911944	0.903948
888	0.916667	1	1	1	0.941176	0.828125	0.983051	0.952381	0.762712	1	0.88	1	1	0.921429	0.985075	1	0.911072	0.903088
889	0.979167	1	1	1	0.897059	0.84375	0.949153	0.964286	0.768362	0.967742	0.946667	1	1	0.914286	0.985075	1	0.918047	0.910811
890	0.96875	1	1	1	0.852941	0.828125	0.983051	0.964286	0.757062	1	0.906667	1	1	0.914286	0.940299	1	0.908457	0.900341
891	0.947917	1	1	1	0.867647	0.835938	0.966102	0.916667	0.751412	0.967742	0.906667	1	1	0.935714	0.985075	1	0.907585	0.89934
892	0.979167	1	1	1	0.955882	0.851562	0.983051	0.97619	0.779661	0.967742	0.866667	1	1	0.9	1	1	0.920663	0.913466
893	0.979167	1	1	1	0.897059	0.875	0.966102	0.904762	0.774011	1	0.92	1	1	0.892857	1	1	0.916303	0.90879
894	0.96875	1	1	1	0.852941	0.84375	0.983051	0.940476	0.774011	1	0.866667	1	1	0.892857	0.985075	1	0.908457	0.900165
895	0.947917	1	1	1	0.852941	0.867188	0.966102	0.904762	0.774011	0.967742	0.893333	1	1	0.892857	0.985075	1	0.906713	0.8982
896	0.947917	1	1	1	0.955882	0.859375	0.983051	0.952381	0.774011	1	0.853333	1	1	0.892857	0.955224	1	0.912816	0.904952
897	0.958333	1	1	1	0.838235	0.867188	0.983051	0.940476	0.757062	1	0.866667	1	1	0.9	0.985075	1	0.907585	0.899393
898	0.947917	1	1	1	0.911765	0.851562	0.983051	0.940476	0.774011	1	0.92	1	1	0.907143	0.940299	1	0.913688	0.905929
899	0.979167	1	1	1	0.882353	0.867188	0.966102	0.916667	0.779661	0.967742	0.893333	1	1	0.914286	0.955224	1	0.913688	0.905882
900	0.96875	1	1	1	0.926471	0.851562	0.966102	0.904762	0.774011	1	0.84	1	1	0.9	1	1	0.910201	0.902171
901	0.979167	1	1	1	0.911765	0.796875	0.966102	0.940476	0.751412	1	0.92	1	1	0.907143	0.970149	1	0.907585	0.899386
902	0.9375	1	1	1	0.897059	0.804688	0.983051	0.964286	0.757062	1	0.933333	1	1	0.935714	0.970149	1	0.911944	0.904006
903	0.979167	1	1	1	0.911765	0.8125	0.966102	0.940476	0.757062	0.967742	0.893333	1	1	0.935714	0.970149	1	0.911072	0.903009
904	0.989583	1	1	1	0.941176	0.820312	0.983051	0.940476	0.785311	1	0.906667	1	1	0.907143	1	1	0.919791	0.912501
905	0.958333	1	1	1	0.926471	0.796875	0.949153	0.940476	0.762712	0.967742	0.786667	1	1	0.921429	1	1	0.901482	0.892547
906	0.947917	1	1	1	0.897059	0.851562	0.966102	0.940476	0.774011	1	0.853333	1	1	0.921429	1	1	0.912816	0.904972
907	0.9375	1	1	1	0.911765	0.859375	0.983051	0.97619	0.762712	1	0.866667	1	1	0.914286	0.985075	1	0.91456	0.906979
908	0.958333	1	1	1	0.897059	0.84375	0.983051	0.940476	0.757062	0.967742	0.92	1	1	0.914286	0.985075	1	0.912816	0.904919
909	0.96875	1	1	1	0.955882	0.84375	1	0.916667	0.768362	0.967742	0.88	1	1	0.9	0.985075	1	0.913688	0.905982
910	0.927083	1	1	1	0.882353	0.859375	0.983051	0.928571	0.779661	1	0.866667	1	1	0.9	0.970149	1	0.908457	0.900115
911	0.958333	1	1	1	0.911765	0.84375	0.983051	0.940476	0.745763	0.967742	0.96	1	1	0.892857	0.985075	1	0.911944	0.90423
912	0.958333	1	1	1	0.926471	0.828125	0.966102	0.952381	0.768362	0.935484	0.893333	1	1	0.914286	0.970149	1	0.911072	0.903029
913	0.9375	1	1	1	0.897059	0.835938	0.983051	0.988095	0.762712	0.967742	0.866667	1	1	0.907143	0.955224	1	0.908457	0.900193
914	0.96875	1	1	1	0.867647	0.835938	1	0.940476	0.745763	1	0.92	1	1	0.892857	1	1	0.909329	0.901247
915	0.979167	1	1	1	0.955882	0.859375	0.966102	0.940476	0.768362	1	0.826667	1	1	0.914286	0.970149	1	0.91456	0.906853
916	0.9375	1	1	1	0.882353	0.851562	0.983051	0.964286	0.757062	0.967742	0.906667	1	1	0.928571	0.985075	1	0.913688	0.905997
917	0.96875	1	1	1	0.911765	0.820312	0.932203	0.940476	0.757062	1	0.866667	1	1	0.878571	0.955224	1	0.90061	0.891675
918	0.979167	1	1	1	0.911765	0.820312	0.983051	0.928571	0.768362	1	0.933333	1	1	0.9	0.970149	1	0.912816	0.904974
919	0.958333	1	1	1	0.882353	0.8125	0.966102	0.928571	0.774011	1	0.946667	0.954545	1	0.9	0.955224	1	0.907585	0.899139
920	0.927083	1	1	1	0.926471	0.820312	0.949153	0.952381	0.762712	1	0.866667	1	1	0.892857	1	1	0.904969	0.896326
921	0.958333	1	1	1	0.882353	0.8125	0.983051	0.916667	0.745763	1	0.88	1	1	0.907143	0.985075	1	0.902354	0.893474
922	0.958333	1	1	1	0.867647	0.882812	0.983051	0.964286	0.762712	1	0.866667	1	1	0.892857	1	1	0.913688	0.90602
923	0.947917	1	1	1	0.926471	0.835938	1	0.940476	0.774011	1	0.84	1	1	0.892857	0.955224	1	0.907585	0.899199
924	0.9375	1	1	1	0.897059	0.828125	0.949153	0.940476	0.79096	1	0.906667	1	1	0.9	0.970149	1	0.910201	0.901989
925	0.9375	1	1	1	0.926471	0.84375	1	0.952381	0.751412	0.967742	0.906667	1	1	0.907143	0.970149	1	0.911072	0.903143
926	0.96875	1	1	1	0.941176	0.828125	1	0.892857	0.774011	1	0.866667	1	1	0.907143	0.985075	1	0.911072	0.90305
927	0.958333	1	1	1	0.955882	0.804688	0.983051	0.940476	0.785311	0.967742	0.933333	1	1	0.907143	1	1	0.917175	0.909664
928	0.947917	1	1	1	0.911765	0.851562	0.966102	0.928571	0.768362	1	0.853333	1	1	0.907143	0.970149	1	0.908457	0.900218
929	0.947917	1	1	1	0.882353	0.835938	0.966102	0.940476	0.768362	1	0.88	1	1	0.892857	0.985075	1	0.906713	0.898252
930	0.947917	1	1	1	0.897059	0.820312	0.983051	0.940476	0.768362	1	0.92	1	1	0.907143	0.985075	1	0.911072	0.903022
931	0.958333	1	1	1	0.941176	0.789062	0.966102	0.952381	0.768362	1	0.933333	1	1	0.9	0.970149	1	0.910201	0.902085
932	0.9375	1	1	1	0.926471	0.804688	0.932203	0.928571	0.768362	1	0.946667	1	1	0.9	1	1	0.908457	0.900138
933	0.958333	1	1	1	0.882353	0.828125	0.983051	0.964286	0.79096	1	0.893333	1	1	0.907143	0.955224	1	0.913688	0.905769
934	0.958333	1	1	1	0.867647	0.84375	0.898305	0.892857	0.768362	1	0.88	1	1	0.914286	0.985075	1	0.903226	0.894475
935	0.96875	1	1	1	0.955882	0.828125	0.983051	0.964286	0.79096	1	0.84	1	1	0.914286	1	1	0.918919	0.911437
936	0.979167	1	1	1	0.838235	0.828125	0.966102	0.952381	0.774011	1	0.88	1	1	0.885714	0.955224	1	0.904969	0.896366
937	0.979167	1	1	1	0.897059	0.804688	0.966102	0.916667	0.785311	1	0.92	1	1	0.9	0.940299	1	0.908457	0.900135
938	0.958333	1	1	1	0.911765	0.835938	0.949153	0.940476	0.768362	1	0.866667	1	1	0.9	0.970149	1	0.907585	0.899117
939	0.96875	1	1	1	0.852941	0.820312	0.966102	0.952381	0.762712	0.967742	0.92	1	1	0.885714	0.970149	1	0.904969	0.896504
940	0.9375	1	1	1	0.882353	0.859375	0.983051	0.964286	0.762712	1	0.88	1	1	0.9	0.970149	1	0.910201	0.902176
941	0.947917	1	1	1	0.911765	0.8125	0.949153	0.97619	0.768362	1	0.92	1	1	0.914286	0.985075	1	0.912816	0.905001
942	0.958333	1	1	1	0.882353	0.835938	0.983051	0.928571	0.762712	0.967742	0.92	1	1	0.935714	0.970149	1	0.912816	0.904893
943	0.958333	1	1	1	0.867647	0.828125	0.983051	0.952381	0.774011	1	0.893333	1	1	0.9	0.955224	1	0.908457	0.900189
944	0.96875	1	1	1	0.897059	0.828125	0.966102	0.964286	0.785311	1	0.88	1	1	0.914286	0.970149	1	0.91456	0.906895
945	0.96875	1	1	1	0.911765	0.8125	0.983051	0.952381	0.768362	1	0.826667	1	1	0.892857	1	1	0.906713	0.898242
946	0.958333	1	1	1	0.911765	0.796875	1	0.97619	0.751412	1	0.88	1	1	0.9	1	1	0.908457	0.900322
947	0.958333	1	1	1	0.882353	0.828125	0.966102	0.916667	0.751412	0.967742	0.92	1	1	0.921429	1	1	0.908457	0.900177
948	0.958333	1	1	1	0.867647	0.828125	0.949153	0.940476	0.774011	1	0.92	1	1	0.928571	0.955224	1	0.911072	0.902953
949	0.947917	1	1	1	0.882353	0.804688	0.983051	0.97619	0.785311	0.967742	0.893333	1	1	0.914286	0.970149	1	0.911072	0.90289
950	0.96875	1	1	1	0.911765	0.867188	0.966102	0.964286	0.757062	0.967742	0.92	1	1	0.9	0.970149	1	0.915432	0.907934
951	0.979167	1	1	1	0.882353	0.8125	0.949153	0.940476	0.757062	1	0.92	1	1	0.907143	1	1	0.909329	0.901078
952	0.90625	1	1	1	0.955882	0.84375	1	0.952381	0.768362	0.967742	0.853333	1	1	0.928571	0.970149	1	0.911944	0.903818
953	0.947917	1	1	1	0.955882	0.84375	0.983051	0.964286	0.768362	1	0.893333	1	1	0.921429	0.970149	1	0.918047	0.910606
954	0.958333	1	1	1	0.867647	0.828125	0.966102	0.928571	0.751412	0.967742	0.88	0.954545	1	0.907143	0.955224	1	0.90061	0.891574
955	0.989583	1	1	1	0.911765	0.796875	1	0.952381	0.768362	0.967742	0.88	1	1	0.907143	0.985075	1	0.911072	0.902982
956	0.9375	1	1	1	0.897059	0.875	0.966102	0.916667	0.762712	1	0.88	1	1	0.892857	0.970149	1	0.907585	0.899289
957	0.927083	1	1	1	0.911765	0.867188	0.983051	0.97619	0.768362	1	0.906667	1	1	0.9	0.955224	1	0.91456	0.906944
958	0.979167	1	1	1	0.911765	0.8125	0.983051	0.964286	0.768362	1	0.866667	1	1	0.928571	1	1	0.915432	0.907773
959	0.989583	1	1	1	0.911765	0.875	0.983051	0.928571	0.751412	0.967742	0.893333	1	1	0.9	0.970149	1	0.913688	0.906152
960	0.979167	1	1	1	0.941176	0.789062	0.966102	0.940476	0.768362	1	0.826667	1	1	0.935714	0.985075	1	0.909329	0.901153
961	0.958333	1	1	1	0.941176	0.835938	0.983051	0.964286	0.779661	0.935484	0.893333	1	1	0.885714	0.940299	1	0.911072	0.902959
962	0.958333	1	1	1	0.955882	0.78125	0.949153	0.952381	0.779661	1	0.946667	1	1	0.921429	0.970149	1	0.91456	0.906822
963	0.947917	1	1	1	0.926471	0.8125	0.983051	0.964286	0.785311	1	0.866667	1	1	0.892857	0.970149	1	0.910201	0.902075
964	0.947917	1	1	1	0.941176	0.835938	0.983051	0.916667	0.785311	1	0.906667	1	1	0.885714	1	1	0.913688	0.905771
965	0.958333	1	1	1	0.926471	0.835938	0.949153	0.928571	0.757062	1	0.813333	1	1	0.885714	0.985075	1	0.901482	0.892654
966	0.96875	1	1	1	0.926471	0.835938	0.966102	0.940476	0.785311	1	0.826667	1	1	0.892857	0.985075	1	0.910201	0.90197
967	0.979167	1	1	1	0.897059	0.8125	0.983051	0.916667	0.768362	0.967742	0.893333	1	1	0.928571	0.955224	1	0.909329	0.901086
968	0.947917	1	1	1	0.926471	0.851562	1	0.952381	0.774011	1	0.84	1	1	0.914286	0.970149	1	0.913688	0.906004
969	0.947917	1	1	1	0.926471	0.820312	0.983051	0.940476	0.785311	0.935484	0.88	1	1	0.9	0.970149	1	0.909329	0.90093
970	0.96875	1	1	1	0.897059	0.8125	0.966102	0.880952	0.762712	1	0.933333	1	1	0.921429	0.970149	1	0.907585	0.899243
971	0.958333	1	1	1	0.897059	0.84375	1	0.964286	0.757062	0.967742	0.853333	1	1	0.907143	0.985075	1	0.910201	0.902151
972	0.958333	1	1	1	0.926471	0.851562	0.983051	0.952381	0.762712	1	0.866667	1	1	0.892857	0.955224	1	0.910201	0.902144
973	0.96875	1	1	1	0.911765	0.835938	1	0.988095	0.762712	1	0.906667	1	1	0.907143	1	1	0.918919	0.911674
974	0.9375	1	1	1	0.911765	0.828125	0.983051	0.952381	0.768362	1	0.866667	1	1	0.914286	0.985075	1	0.910201	0.902048
975	0.96875	1	1	1	0.926471	0.859375	0.966102	0.952381	0.774011	1	0.88	1	1	0.928571	1	1	0.920663	0.913519
976	0.9375	1	1	1	0.911765	0.84375	0.966102	0.964286	0.751412	0.967742	0.866667	1	1	0.885714	1	1	0.905841	0.897426
977	0.979167	1	1	1	0.955882	0.789062	0.966102	0.964286	0.774011	0.967742	0.88	1	1	0.907143	0.940299	1	0.909329	0.901045
978	0.947917	1	1	1	0.926471	0.835938	0.983051	0.964286	0.785311	0.967742	0.906667	1	1	0.892857	0.970149	1	0.91456	0.906849
979	0.90625	1	1	1	0.911765	0.820312	0.983051	0.952381	0.762712	0.967742	0.906667	0.954545	1	0.928571	0.985075	1	0.908457	0.900152
980	0.979167	1	1	1	0.955882	0.820312	0.949153	0.97619	0.785311	1	0.906667	1	1	0.892857	0.985075	1	0.918047	0.910677
981	0.979167	1	1	1	0.882353	0.84375	1	0.940476	0.779661	0.967742	0.906667	1	1	0.907143	0.985075	1	0.916303	0.908671
982	0.958333	1	1	1	0.955882	0.8125	1	0.97619	0.785311	0.967742	0.893333	1	1	0.914286	0.985075	1	0.918919	0.911523
983	0.947917	1	1	1	0.911765	0.804688	0.966102	0.928571	0.774011	1	0.92	1	1	0.892857	0.955224	1	0.905841	0.897276
984	0.958333	1	1	1	0.897059	0.835938	0.966102	0.880952	0.768362	1	0.906667	1	1	0.921429	0.985075	1	0.909329	0.90118
985	0.96875	1	1	1	0.970588	0.75	0.932203	0.988095	0.785311	1	0.866667	1	1	0.885714	0.985075	1	0.906713	0.898239
986	0.9375	1	1	1	0.911765	0.820312	0.983051	0.940476	0.768362	0.967742	0.933333	0.954545	1	0.9	1	1	0.910201	0.902051
987	0.979167	1	1	1	0.955882	0.8125	0.966102	0.940476	0.768362	1	0.893333	1	1	0.907143	0.985075	1	0.913688	0.905854
988	0.96875	1	1	1	0.911765	0.84375	0.966102	0.928571	0.768362	0.967742	0.88	1	1	0.892857	0.985075	1	0.909329	0.901128
989	0.958333	1	1	1	0.867647	0.828125	0.966102	0.928571	0.774011	1	0.906667	1	1	0.921429	1	1	0.911944	0.903876
990	0.947917	1	1	1	0.882353	0.851562	1	0.964286	0.757062	1	0.893333	1	1	0.9	0.970149	1	0.911072	0.90308
991	0.9375	1	1	1	0.941176	0.820312	0.983051	0.97619	0.779661	1	0.933333	1	1	0.921429	0.955224	1	0.918047	0.910513
992	0.947917	1	1	1	0.867647	0.828125	0.983051	0.97619	0.768362	0.967742	0.92	0.954545	1	0.9	0.985075	1	0.910201	0.90203
993	0.927083	1	1	1	0.897059	0.84375	0.966102	0.952381	0.779661	0.967742	0.88	1	1	0.9	0.970149	1	0.908457	0.900088
[truncated: 908 more rows]

## Sheet: Random forest
Number of features	5C-condition cultured human primary hepatocyte	Cultured human primary intrahepatic biliary epithelial cell	Definitive endoderm	Endoderm stem cell (EnSC)	EnSC-derived cholangiocyte	EnSC-derived EGFi-untreated hepatocyte	EnSC-derived hepatic endoderm	EnSC-derived hepatoblast	EnSC-derived hepatocyte	EnSC-derived immature hepatocyte	EnSC-derived TPPB-untreated cholangiocyte	Hepatocyte derived from ProliHH P2 through 3D maturation	Hepatocyte derived from ProliHH P5 through 3D maturation	Human embryonic stem cell-derived hepatocyte-like cell	Sorted ALB+ CYP3A4+ EnSC-derived hepatocyte	Uncultured adult human primary hepatocyte	ACC	MCC
[truncated: 1,901 more rows]
