# Supplementary material for: Identifying In Vitro Cultured Human Hepatocytes Markers with Machine Learning Methods Based on Single-Cell RNA-Seq Data
Source: Front Bioeng Biotechnol. 2022 May 30;10:916309. doi: 10.3389/fbioe.2022.916309 (PMC9189284; doi:10.3389/fbioe.2022.916309)
Supplement: Supplementary file 3 [file Table4.XLSX]

## Sheet: GO
ONTOLOGY	ID	Description	GeneRatio	BgRatio	pvalue	p.adjust	qvalue	geneID	Count
BP	GO:0006614	SRP-dependent cotranslational protein targeting to membrane	58/1127	105/18862	3.1104e-43	1.68397e-39	1.21567e-39	6132/6176/6124/6144/6125/6207/6175/6194/6129/6160/6209/6208/6188/6164/6727/6159/4736/6233/6228/6161/6181/6141/6224/6122/9349/11224/6235/6168/6191/6147/6135/6205/6193/6137/6206/6726/6201/3921/6202/23521/6189/6167/6165/6170/6229/6134/6227/6169/6133/6136/6155/9045/6187/6142/6154/25873/6143/6171	58
BP	GO:0000184	nuclear-transcribed mRNA catabolic process, nonsense-mediated decay	61/1127	120/18862	1.53455e-42	4.15403e-39	2.99884e-39	6132/6176/6124/6144/6125/6207/6175/6194/6129/6160/6209/6208/6188/6164/6159/4736/6233/6228/6161/6181/6141/6224/6122/9349/11224/6235/6168/6191/6147/6135/6205/6193/6137/6206/6201/3921/6202/23521/6189/6167/6165/6170/9939/6229/6134/6227/6169/6133/6136/6155/26986/9045/6187/6142/6154/1981/5515/25873/6143/55629/6171	61
BP	GO:0006613	cotranslational protein targeting to membrane	58/1127	110/18862	1.09818e-41	1.98185e-38	1.43071e-38	6132/6176/6124/6144/6125/6207/6175/6194/6129/6160/6209/6208/6188/6164/6727/6159/4736/6233/6228/6161/6181/6141/6224/6122/9349/11224/6235/6168/6191/6147/6135/6205/6193/6137/6206/6726/6201/3921/6202/23521/6189/6167/6165/6170/6229/6134/6227/6169/6133/6136/6155/9045/6187/6142/6154/25873/6143/6171	58
BP	GO:0072599	establishment of protein localization to endoplasmic reticulum	59/1127	124/18862	4.64976e-39	6.29345e-36	4.5433e-36	6132/6176/6124/6144/6125/6207/6175/6194/6129/6160/10890/6209/6208/6188/6164/6727/6159/4736/6233/6228/6161/6181/6141/6224/6122/9349/11224/6235/6168/6191/6147/6135/6205/6193/6137/6206/6726/6201/3921/6202/23521/6189/6167/6165/6170/6229/6134/6227/6169/6133/6136/6155/9045/6187/6142/6154/25873/6143/6171	59
BP	GO:0045047	protein targeting to ER	58/1127	120/18862	6.66266e-39	7.21433e-36	5.20809e-36	6132/6176/6124/6144/6125/6207/6175/6194/6129/6160/6209/6208/6188/6164/6727/6159/4736/6233/6228/6161/6181/6141/6224/6122/9349/11224/6235/6168/6191/6147/6135/6205/6193/6137/6206/6726/6201/3921/6202/23521/6189/6167/6165/6170/6229/6134/6227/6169/6133/6136/6155/9045/6187/6142/6154/25873/6143/6171	58
BP	GO:0070972	protein localization to endoplasmic reticulum	63/1127	152/18862	3.72e-37	3.35668e-34	2.42322e-34	6132/6176/6124/6144/6125/6207/6175/6194/6129/6160/10890/6209/6208/57142/6188/6164/6727/6159/4736/6233/6228/6161/6181/6141/6224/6122/9349/11224/6235/6168/6191/6147/10134/6135/6205/6193/6137/6206/6726/6201/3921/6202/23521/6189/6167/6165/10945/6170/6229/6134/6227/11014/6169/6133/6136/6155/9045/6187/6142/6154/25873/6143/6171	63
BP	GO:0019083	viral transcription	64/1127	180/18862	5.20668e-33	3.73785e-30	2.69839e-30	6132/6176/6124/3249/6144/6125/6207/6175/6194/6129/6160/6209/6208/6188/6164/6159/4736/6233/6228/6161/10410/6181/6141/6224/6122/9349/11224/5441/6235/6168/6191/6147/6135/6205/6193/6137/6206/6201/3921/6202/23521/6189/6167/64710/6165/6170/6229/6134/6227/6169/6133/6136/6155/9045/6187/6142/6154/3725/25873/81603/6143/5430/5434/6171	64
BP	GO:0019080	viral gene expression	67/1127	198/18862	5.52323e-33	3.73785e-30	2.69839e-30	6132/6176/6124/3249/6144/6125/6207/6175/6194/6129/6160/6209/6208/6188/6164/6159/4736/6233/6228/6161/10410/6181/6141/6224/6122/9349/11224/5441/6235/6168/6191/6147/6135/6205/6193/6137/6206/6201/3921/6202/23521/6189/6167/64710/6165/6170/6229/6134/6227/51386/6169/6133/6136/6155/9045/6187/6142/5094/6154/3725/25873/81603/6143/5430/5434/5045/6171	67
BP	GO:0006413	translational initiation	63/1127	193/18862	4.68467e-30	2.81809e-27	2.03441e-27	6132/6176/6124/6144/6125/6207/6175/5499/6194/6129/6160/6209/6208/6188/6164/6159/4736/6233/6228/6161/6181/6141/6224/6122/9349/11224/6235/6168/6191/6147/6135/6205/6193/6137/6206/6201/3921/6202/23521/6189/6167/6165/6170/6229/6134/6227/51386/6169/6133/6136/6155/26986/9045/6187/6142/6154/1981/1653/25873/6143/3315/6171/1968	63
BP	GO:0000956	nuclear-transcribed mRNA catabolic process	65/1127	208/18862	1.01668e-29	5.50428e-27	3.9736e-27	6132/6176/6124/6144/6125/6207/6175/6194/6129/6160/6209/6208/6188/6164/6159/4736/1655/6233/6228/6161/6181/6141/6224/6122/9349/11224/6235/6168/6191/6147/6135/6205/6193/6137/6206/6201/3921/6202/23521/6189/6167/6165/6170/9939/6229/6134/6227/677/6169/6133/6136/6155/26986/9045/25804/6187/6142/6154/1981/5515/25873/6143/550643/55629/6171	65
BP	GO:0090150	establishment of protein localization to membrane	84/1127	354/18862	1.55453e-28	7.65113e-26	5.52343e-26	6132/7534/6176/6124/6144/6125/6207/6175/801/6194/6129/6160/10890/6209/6208/10399/6188/6164/6727/6159/4736/6233/6228/6161/6181/6141/6224/6122/9349/11224/6235/6168/6191/6147/6135/6205/6193/100133941/6137/6206/83871/6726/6201/3921/6202/808/23521/6189/6167/6165/6170/2040/6229/11261/6134/6227/6169/6133/6136/6155/2810/481/9045/6187/6142/3308/140823/2181/6154/10971/1956/7529/3875/5621/81693/3320/25873/6…	84
BP	GO:0006605	protein targeting	93/1127	441/18862	2.45291e-27	1.10667e-24	7.98917e-25	6132/6176/6124/6144/6125/6207/6175/6194/6129/6160/3417/6209/6208/6188/6164/1191/6727/6159/4736/6233/6228/6161/6181/847/6141/6224/6122/9349/11224/6235/6168/6191/6147/10134/6135/54363/54741/6205/6193/6137/6206/6726/6201/3921/6202/23521/6189/6167/6165/3920/6170/2040/6229/11261/6134/29103/6227/570/6169/9804/6133/6136/6155/59286/130916/9045/6187/6142/3308/10440/140823/6154/10971/8310/7529/189/5880/562…	93
BP	GO:0006612	protein targeting to membrane	62/1127	211/18862	9.59544e-27	3.99613e-24	2.88485e-24	6132/6176/6124/6144/6125/6207/6175/6194/6129/6160/6209/6208/6188/6164/6727/6159/4736/6233/6228/6161/6181/6141/6224/6122/9349/11224/6235/6168/6191/6147/6135/6205/6193/6137/6206/6726/6201/3921/6202/23521/6189/6167/6165/6170/2040/6229/11261/6134/6227/6169/6133/6136/6155/9045/6187/6142/6154/5621/25873/6143/90522/6171	62
BP	GO:0002576	platelet degranulation	46/1127	128/18862	2.73307e-24	1.05692e-21	7.62998e-22	5919/967/2243/226/7114/2266/5004/5265/2244/801/6647/350/3479/9948/1191/334/2335/710/3827/3273/5660/5005/213/3699/197/3920/308/7057/8407/2316/5154/135228/6694/6678/351/10916/5340/5099/3481/7018/5196/7094/6414/7076/12/2	46
BP	GO:0006402	mRNA catabolic process	80/1127	375/18862	5.60377e-24	2.02259e-21	1.46013e-21	6132/7534/6176/6124/6144/6125/6207/6175/10247/6194/6129/6160/6209/6208/6188/6164/6159/4736/1655/6233/6228/6161/6418/6181/6141/6224/6122/9349/11224/6235/6168/6191/6147/6135/6205/6193/6137/6206/6201/3921/6202/23521/6189/5693/6167/6165/6170/9939/6229/6134/6227/677/6169/6133/6136/6155/26986/9045/25804/6187/10642/6142/5690/6154/1153/7529/1981/8125/3183/5515/25873/6143/550643/7316/3315/4670/55629/10644…	80
BP	GO:0006401	RNA catabolic process	82/1127	414/18862	2.46173e-22	8.32987e-20	6.01342e-20	6132/7534/6176/6124/6144/6125/6207/6175/10247/6194/6129/6160/6209/6208/6188/6164/6159/4736/1655/6233/6228/6161/6418/6181/81892/6141/6224/6122/9349/11224/6235/6168/6191/6147/79727/6135/6205/6193/6137/6206/6201/3921/6202/23521/6189/5693/6167/6165/6170/9939/6229/6134/6227/677/6169/6133/6136/6155/26986/9045/25804/6187/10642/6142/5690/6154/1153/7529/1981/8125/3183/5515/25873/6143/550643/7316/3315/4670…	82
BP	GO:0002446	neutrophil mediated immunity	90/1127	499/18862	1.76037e-21	5.60625e-19	4.04721e-19	2512/5478/967/567/718/226/5004/5265/4257/3240/5284/10890/3417/9948/387/1915/2547/6727/6515/847/929/55004/5660/823/5005/5236/2720/2495/116844/9588/2665/197/374395/3920/6282/2040/7276/7520/5223/3146/1727/29952/1535/684/3916/84418/3728/57153/302/1508/2950/3685/8804/966/8876/1476/8826/3958/1512/1471/83716/1509/2896/1938/4680/391/3106/3934/7077/8673/3320/1075/6286/5319/1773/2150/1832/2934/1650/5476/58…	90
BP	GO:0009636	response to toxic substance	59/1127	239/18862	2.81565e-21	8.46886e-19	6.11376e-19	4502/5445/4257/3240/6647/5052/348/445/4501/84293/847/6648/4499/4495/1373/4493/10786/4519/7295/1728/213/4494/9588/4496/2052/5444/9536/5595/7001/2950/22977/5446/2168/2938/2878/57016/2882/1244/283120/493869/2876/1026/2877/2353/6382/51714/2984/7296/6649/10935/9076/6415/1543/23530/4780/337/23428/10516/1644	59
BP	GO:0042119	neutrophil activation	89/1127	500/18862	7.44947e-21	2.12271e-18	1.5324e-18	2512/5478/967/567/718/226/5004/5265/4257/3240/5284/10890/3417/387/1915/2547/6727/6515/847/929/55004/5660/823/5005/5236/2720/2495/116844/9588/2665/197/374395/3920/6282/2040/7276/7520/5223/5320/3146/1727/29952/1535/684/3916/84418/3728/57153/302/1508/2950/3685/8804/966/8876/1476/8826/3958/1512/1471/83716/1509/2896/1938/4680/391/3106/3934/7077/8673/3320/1075/6286/1773/2150/1832/2934/1650/5476/58485/2…	89
BP	GO:0002283	neutrophil activation involved in immune response	87/1127	488/18862	1.87868e-20	5.08559e-18	3.67134e-18	2512/5478/967/567/718/226/5004/5265/4257/3240/5284/10890/3417/387/1915/2547/6727/6515/847/929/55004/5660/823/5005/5236/2720/2495/116844/9588/2665/197/374395/3920/6282/2040/7276/7520/5223/3146/1727/29952/1535/684/3916/84418/3728/57153/302/1508/2950/3685/8804/966/8876/1476/8826/3958/1512/1471/83716/1509/2896/1938/4680/391/3106/3934/7077/8673/3320/1075/6286/1773/1832/2934/1650/5476/58485/203068/3074…	87
BP	GO:0043312	neutrophil degranulation	86/1127	485/18862	4.51429e-20	1.16383e-17	8.40179e-18	2512/5478/967/567/718/226/5004/5265/4257/3240/5284/10890/3417/387/1915/2547/6727/6515/847/929/55004/5660/823/5005/5236/2720/2495/116844/9588/2665/197/374395/3920/6282/2040/7276/7520/5223/3146/1727/29952/1535/684/3916/84418/3728/57153/302/1508/2950/3685/8804/966/8876/1476/8826/3958/1512/1471/83716/1509/2896/1938/4680/391/3106/3934/7077/8673/3320/1075/6286/1832/2934/1650/5476/58485/203068/3074/5164…	86
BP	GO:0098754	detoxification	43/1127	138/18862	5.04666e-20	1.24194e-17	8.96568e-18	4502/4257/3240/6647/5052/348/4501/84293/847/6648/4499/4495/4493/10786/7295/1728/213/4494/9588/4496/9536/7001/2950/22977/2168/2938/2878/57016/2882/1244/283120/493869/2876/2877/51714/7296/6649/10935/6415/23530/4780/337/10516	43
BP	GO:0010038	response to metal ion	70/1127	352/18862	2.53676e-19	5.97132e-17	4.31076e-17	682/567/2243/2266/2805/4502/2244/801/5499/6647/445/5176/4501/664/847/6648/4499/366/929/805/4495/1373/4493/4519/311/7341/1728/4494/808/4496/5009/4512/7057/1906/8644/595/9536/5595/7031/3727/10272/8826/6678/1956/22872/8754/351/6284/140576/3726/5066/1244/5621/3725/2203/6898/5515/48/2353/2934/7018/6382/6649/3485/9076/1543/4780/3383/857/57817	70
BP	GO:0030198	extracellular matrix organization	71/1127	393/18862	3.3148e-17	7.47763e-15	5.39817e-15	682/3249/2243/2266/2244/1361/2335/1284/3818/823/824/3936/3675/7276/6624/3694/7057/4035/871/2200/3673/649/8076/826/2264/255743/3685/858/1308/3037/55959/183/5154/1282/3909/1471/2331/3911/83716/3491/6678/1462/7448/3918/351/1514/3913/3914/7077/196264/2201/1291/3688/10653/7045/5340/1803/5654/5045/64116/3383/857/7076/4060/4323/1287/1999/10516/3912/8728/2	71
BP	GO:0043062	extracellular structure organization	71/1127	394/18862	3.81666e-17	8.26537e-15	5.96685e-15	682/3249/2243/2266/2244/1361/2335/1284/3818/823/824/3936/3675/7276/6624/3694/7057/4035/871/2200/3673/649/8076/826/2264/255743/3685/858/1308/3037/55959/183/5154/1282/3909/1471/2331/3911/83716/3491/6678/1462/7448/3918/351/1514/3913/3914/7077/196264/2201/1291/3688/10653/7045/5340/1803/5654/5045/64116/3383/857/7076/4060/4323/1287/1999/10516/3912/8728/2	71
BP	GO:0042493	response to drug	67/1127	359/18862	4.7625e-17	9.91699e-15	7.15917e-15	3939/567/4257/2778/1361/6647/445/4837/1499/847/10550/6648/1373/4519/1728/1571/2027/123/2180/5009/3675/7520/4535/7057/7852/9027/1906/6281/595/3673/22949/3956/301/1562/1956/2627/7037/10512/5066/1938/1558/1244/476/3725/768/2203/5764/7077/1026/7050/1503/27063/2353/10400/29881/6554/2625/3485/7385/1555/1848/1543/6422/4780/3383/1559/1644	67
BP	GO:0045229	external encapsulating structure organization	71/1127	396/18862	5.0514e-17	1.0129e-14	7.31223e-15	682/3249/2243/2266/2244/1361/2335/1284/3818/823/824/3936/3675/7276/6624/3694/7057/4035/871/2200/3673/649/8076/826/2264/255743/3685/858/1308/3037/55959/183/5154/1282/3909/1471/2331/3911/83716/3491/6678/1462/7448/3918/351/1514/3913/3914/7077/196264/2201/1291/3688/10653/7045/5340/1803/5654/5045/64116/3383/857/7076/4060/4323/1287/1999/10516/3912/8728/2	71
BP	GO:0010466	negative regulation of peptidase activity	54/1127	257/18862	2.91403e-16	5.63449e-14	4.0676e-14	2597/718/259/5265/334/5176/710/3827/3273/831/3699/462/197/6906/7057/27018/4035/871/684/727/2810/302/26998/1476/183/135228/144568/6694/1471/5272/10406/8710/3697/2168/7448/351/6690/5621/4102/1469/7077/7035/2876/10653/5037/2719/51232/10935/5045/7076/274/27344/12/2	54
BP	GO:0045861	negative regulation of proteolysis	64/1127	346/18862	3.83678e-16	7.16287e-14	5.17095e-14	2597/718/6125/259/5265/1361/334/5176/710/3827/3273/9349/831/6135/3699/6201/55450/462/197/6906/7057/27018/4035/871/684/727/2810/302/26998/1476/183/135228/144568/6694/1471/5272/10406/8710/3697/2168/7448/351/26022/6690/5621/4102/1469/7077/7035/2876/10653/5037/2719/6599/143941/51232/10935/5045/7076/274/27344/12/9528/2	64
BP	GO:0010951	negative regulation of endopeptidase activity	52/1127	245/18862	6.70039e-16	1.2092e-13	8.72931e-14	2597/718/259/5265/334/5176/710/3827/3273/831/3699/462/197/6906/7057/27018/871/684/727/2810/302/26998/1476/183/135228/144568/6694/1471/5272/10406/8710/3697/2168/7448/351/6690/5621/4102/1469/7077/7035/2876/10653/5037/51232/10935/5045/7076/274/27344/12/2	52
BP	GO:0002181	cytoplasmic translation	32/1127	102/18862	2.40766e-15	4.07346e-13	2.94067e-13	6132/6176/6175/6160/6159/4736/6228/6161/6181/6141/6235/79727/6135/3921/7555/23521/6165/6170/6227/51386/6169/6133/6142/6154/1981/1938/25873/6143/200916/5315/6171/1968	32
BP	GO:0098869	cellular oxidant detoxification	32/1127	102/18862	2.40766e-15	4.07346e-13	2.94067e-13	4257/3240/6647/5052/348/84293/847/6648/7295/1728/213/9588/9536/7001/2950/2168/2938/2878/2882/283120/493869/2876/2877/51714/7296/6649/10935/6415/23530/4780/337/10516	32
BP	GO:0052547	regulation of peptidase activity	74/1127	455/18862	2.54064e-15	4.16819e-13	3.00906e-13	2597/718/259/5265/10399/6188/334/5176/2335/710/10550/3827/3273/831/10134/3699/462/197/6906/3146/7057/27018/4035/871/684/727/3336/2810/302/26998/1476/183/135228/1512/144568/6694/1471/3491/5272/64065/10406/8710/1509/3697/2168/2896/7448/351/8795/6690/5621/4102/1469/7077/7035/64063/2876/10653/5037/2719/2934/51232/9131/3329/10935/5045/857/7076/1364/274/27344/12/444/2	74
BP	GO:0006631	fatty acid metabolic process	67/1127	392/18862	4.61396e-15	7.34705e-13	5.30391e-13	718/2108/11343/5445/341/1892/38/54363/1571/79746/10449/1645/2180/51084/4706/2052/37/570/1646/5444/1906/34/8644/9536/5595/1109/345/1579/22949/224/2950/2182/301/1562/873/2181/5446/8310/2168/2938/117145/5105/5166/5066/1558/57678/60481/3032/2876/8529/5319/2948/3248/8824/200879/10455/55258/1555/1543/6307/337/348158/857/1559/57834/5264/27329	67
BP	GO:1990748	cellular detoxification	33/1127	115/18862	1.62024e-14	2.50628e-12	1.80931e-12	4257/3240/6647/5052/348/84293/847/6648/7295/1728/213/9588/9536/7001/2950/2168/2938/2878/57016/2882/283120/493869/2876/2877/51714/7296/6649/10935/6415/23530/4780/337/10516	33
BP	GO:0006979	response to oxidative stress	71/1127	444/18862	2.28865e-14	3.42632e-12	2.47349e-12	3939/5478/4541/4257/3240/6647/3417/10399/5052/6188/348/664/847/10550/6648/54363/7295/1728/1571/824/5034/9588/4537/5693/7168/4512/4540/51142/4535/4720/1906/1535/8644/5595/7001/2950/8876/301/140823/1956/2168/2878/8754/351/2882/6421/1938/1244/558/135112/5621/3725/283120/493869/6898/2876/2877/2353/6382/7296/6649/3315/10935/4670/4780/337/6414/51765/4323/5074/10516	71
BP	GO:0008202	steroid metabolic process	59/1127	329/18862	2.34159e-14	3.42632e-12	2.47349e-12	8630/6647/7363/341/348/2638/847/55004/3158/38/3290/1571/1582/319/10449/5901/1645/54657/37/570/1646/5444/336/1727/7108/8644/1109/949/6822/2264/19/2538/183/8431/185/9971/1958/351/3953/9784/1558/476/57678/1577/25987/29881/1551/8608/1555/1543/6307/337/231/1559/3283/7364/8542/23780/27329	59
BP	GO:0006721	terpenoid metabolic process	34/1127	124/18862	2.86567e-14	4.01356e-12	2.89743e-12	5919/348/5950/3158/216/1571/1645/7276/336/4035/8644/1109/345/224/1562/124/1956/1382/57016/1558/195814/1577/2719/6382/125/1551/8608/1543/337/231/1559/157506/59342/57104	34
BP	GO:0051346	negative regulation of hydrolase activity	72/1127	456/18862	2.89119e-14	4.01356e-12	2.89743e-12	2597/718/259/5265/325/341/334/5176/710/6418/3827/3273/2280/831/3699/462/197/6906/11261/7057/27018/336/4035/871/7009/684/727/2810/345/302/26998/1476/8826/301/183/135228/3958/144568/1266/6694/1471/5272/10406/8710/3697/2168/7448/351/3953/9353/6690/5621/5764/4102/1469/7077/7035/2876/10653/5037/2719/51232/10935/5045/7076/6272/274/27344/81706/12/27329/2	72
BP	GO:0007596	blood coagulation	60/1127	342/18862	3.88497e-14	5.25831e-12	3.79603e-12	5478/7534/725/60/2243/3020/2266/998/3021/5265/2244/6288/71/2778/1361/832/350/348/2335/710/3827/3273/3818/462/4627/2160/708/308/7057/1906/3673/5595/2782/2316/7001/966/5154/2627/7448/558/7103/23533/7035/8529/5340/2150/10398/5196/2625/3315/2767/2161/4780/857/7094/57834/5573/2159/3083/2	60
BP	GO:0006066	alcohol metabolic process	63/1127	373/18862	5.42634e-14	7.16542e-12	5.17279e-12	7167/2805/801/6647/3417/3479/348/5950/847/3158/216/54363/319/10449/5901/1645/8611/7276/54657/3418/37/1646/5444/336/1727/7108/8644/1109/949/6822/224/19/124/8431/6526/9971/351/57016/5105/3953/9784/1558/57678/195814/1577/26002/125/5092/25987/29881/1551/8608/1543/6307/337/231/1559/157506/8542/11163/57104/23780/27329	63
BP	GO:1903034	regulation of response to wounding	39/1127	164/18862	6.12252e-14	7.873e-12	5.6836e-12	2243/2266/2244/71/1361/325/350/348/710/3827/3273/3818/462/4192/2160/3146/7057/7852/4035/1906/2316/7001/301/5154/135228/2896/7448/7103/5764/7035/3688/5340/51330/2150/9076/2161/4780/857/1364	39
BP	GO:0006805	xenobiotic metabolic process	33/1127	120/18862	6.25303e-14	7.873e-12	5.6836e-12	1429/4257/2328/1728/1571/1645/2180/2052/54657/134147/1727/5447/2987/6822/2950/22977/1562/4835/5446/2938/1558/1244/13/1577/2948/2939/1551/8824/1555/1543/348158/1559/2941	33
BP	GO:0007599	hemostasis	60/1127	346/18862	6.62447e-14	8.15111e-12	5.88437e-12	5478/7534/725/60/2243/3020/2266/998/3021/5265/2244/6288/71/2778/1361/832/350/348/2335/710/3827/3273/3818/462/4627/2160/708/308/7057/1906/3673/5595/2782/2316/7001/966/5154/2627/7448/558/7103/23533/7035/8529/5340/2150/10398/5196/2625/3315/2767/2161/4780/857/7094/57834/5573/2159/3083/2	60
BP	GO:0050817	coagulation	60/1127	347/18862	7.5584e-14	9.0936e-12	6.56476e-12	5478/7534/725/60/2243/3020/2266/998/3021/5265/2244/6288/71/2778/1361/832/350/348/2335/710/3827/3273/3818/462/4627/2160/708/308/7057/1906/3673/5595/2782/2316/7001/966/5154/2627/7448/558/7103/23533/7035/8529/5340/2150/10398/5196/2625/3315/2767/2161/4780/857/7094/57834/5573/2159/3083/2	60
BP	GO:0097237	cellular response to toxic substance	33/1127	122/18862	1.04951e-13	1.23523e-11	8.91723e-12	4257/3240/6647/5052/348/84293/847/6648/7295/1728/213/9588/9536/7001/2950/2168/2938/2878/57016/2882/283120/493869/2876/2877/51714/7296/6649/10935/6415/23530/4780/337/10516	33
BP	GO:0050818	regulation of coagulation	25/1127	71/18862	1.38628e-13	1.59688e-11	1.1528e-11	2243/2266/2244/1361/350/348/710/3827/3273/3818/462/2160/308/7057/1906/7001/5154/7448/7103/7035/5340/2150/2161/4780/857	25
BP	GO:0044409	entry into host	37/1127	153/18862	1.54579e-13	1.74352e-11	1.25866e-11	682/5478/10581/325/1499/10410/5034/3921/3694/7852/1948/3916/3673/949/3956/3685/1500/858/9074/1956/3853/1514/7037/558/8673/59272/3123/3688/81603/1803/2934/6554/9076/3383/81607/857/10346	37
BP	GO:0044282	small molecule catabolic process	68/1127	431/18862	1.59577e-13	1.76078e-11	1.27113e-11	2597/8630/7167/2108/226/3242/2805/10247/348/3081/1892/144193/229/38/216/54363/5236/2720/2027/10449/5009/1428/5226/51084/5223/37/2184/2806/5230/5444/2023/34/8644/949/51181/1579/6822/224/11112/5446/8310/4907/2168/189/57016/5105/1036/9784/80150/6898/3032/3176/8529/5214/5092/10455/55258/1543/27165/130013/2752/2026/5315/57834/197257/23576/10993/5264	68
BP	GO:0009410	response to xenobiotic stimulus	34/1127	131/18862	1.65866e-13	1.76078e-11	1.27113e-11	1429/4257/2328/1728/1571/1645/2180/2052/54657/134147/1727/5447/2987/6822/2950/22977/1562/4835/5446/2938/1558/1244/13/2876/1577/2948/2939/1551/8824/1555/1543/348158/1559/2941	34
BP	GO:0061041	regulation of wound healing	34/1127	131/18862	1.65866e-13	1.76078e-11	1.27113e-11	2243/2266/2244/71/1361/325/350/348/710/3827/3273/3818/462/2160/3146/7057/7852/1906/7001/301/5154/135228/7448/7103/7035/3688/5340/51330/2150/9076/2161/4780/857/1364	34
BP	GO:0030193	regulation of blood coagulation	24/1127	66/18862	1.87373e-13	1.95084e-11	1.40833e-11	2243/2266/2244/1361/350/348/710/3827/3273/3818/462/2160/7057/1906/7001/5154/7448/7103/7035/5340/2150/2161/4780/857	24
BP	GO:0071466	cellular response to xenobiotic stimulus	33/1127	125/18862	2.23147e-13	2.27947e-11	1.64557e-11	1429/4257/2328/1728/1571/1645/2180/2052/54657/134147/1727/5447/2987/6822/2950/22977/1562/4835/5446/2938/1558/1244/13/1577/2948/2939/1551/8824/1555/1543/348158/1559/2941	33
BP	GO:1900046	regulation of hemostasis	24/1127	67/18862	2.7558e-13	2.76294e-11	1.9946e-11	2243/2266/2244/1361/350/348/710/3827/3273/3818/462/2160/7057/1906/7001/5154/7448/7103/7035/5340/2150/2161/4780/857	24
BP	GO:0052548	regulation of endopeptidase activity	67/1127	426/18862	2.8158e-13	2.77177e-11	2.00097e-11	2597/718/259/5265/10399/6188/334/5176/710/10550/3827/3273/831/10134/3699/462/197/6906/3146/7057/27018/871/684/727/3336/2810/302/26998/1476/183/135228/1512/144568/6694/1471/3491/5272/64065/10406/8710/1509/3697/2168/7448/351/8795/6690/5621/4102/1469/7077/7035/2876/10653/5037/2934/51232/9131/3329/10935/5045/7076/274/27344/12/444/2	67
BP	GO:0051384	response to glucocorticoid	34/1127	135/18862	4.26257e-13	4.12099e-11	2.97498e-11	2805/801/445/5176/1373/2720/808/4537/3146/677/1906/595/2950/301/6678/1956/8754/189/5105/1369/5066/1036/9353/1244/6898/6781/1026/3176/2353/6382/3485/9076/3383/3283	34
BP	GO:0006720	isoprenoid metabolic process	35/1127	143/18862	4.79826e-13	4.5575e-11	3.29011e-11	5919/348/5950/3158/216/1571/1645/7276/336/4035/8644/1109/345/224/1562/124/1956/1382/57016/1558/195814/1577/2719/6382/125/1551/8608/1543/337/231/1559/157506/59342/57104/5264	35
BP	GO:0016101	diterpenoid metabolic process	31/1127	114/18862	5.01007e-13	4.67664e-11	3.37612e-11	5919/348/5950/216/1645/7276/336/4035/8644/1109/345/224/1562/124/1956/1382/57016/1558/195814/1577/2719/6382/125/1551/8608/1543/337/231/157506/59342/57104	31
BP	GO:0031638	zymogen activation	22/1127	58/18862	6.97293e-13	6.39855e-11	4.61918e-11	3249/2243/2266/2244/3240/1361/350/715/3818/2160/7057/5230/2023/1512/3250/64065/1514/2161/5045/4323/3083/444	22
BP	GO:0072593	reactive oxygen species metabolic process	51/1127	281/18862	8.55436e-13	7.71888e-11	5.57234e-11	3240/6647/1401/5052/445/1191/664/847/6648/1373/4513/1728/9588/7416/7057/1727/1906/1535/8644/55765/7001/2950/183/4835/140823/3491/6526/5446/1956/185/2878/5166/5880/283120/3320/2876/1026/59272/2150/1647/6649/10935/1543/23530/4780/337/27165/3383/857/23576/10516	51
BP	GO:0022900	electron transport chain	39/1127	178/18862	1.00875e-12	8.95305e-11	6.4633e-11	4541/27089/8630/2108/4538/27069/4725/7388/4519/4513/6390/4514/4539/4537/4706/4512/316/7384/29103/6389/4540/51142/4535/4720/1535/1109/7386/22977/4835/1346/56901/8974/2877/84419/7385/8608/231/1327/444	39
BP	GO:0046718	viral entry into host cell	34/1127	140/18862	1.31231e-12	1.14594e-10	8.27269e-11	682/5478/10581/325/10410/5034/3921/3694/7852/1948/3916/3673/949/3956/3685/858/9074/1956/1514/7037/558/8673/59272/3123/3688/81603/1803/2934/6554/9076/3383/81607/857/10346	34
BP	GO:0031960	response to corticosteroid	35/1127	152/18862	3.23153e-12	2.77706e-10	2.00479e-10	2805/801/445/5176/1373/2720/808/4537/3146/677/1906/8644/595/2950/301/6678/1956/8754/189/5105/1369/5066/1036/9353/1244/6898/6781/1026/3176/2353/6382/3485/9076/3383/3283	35
BP	GO:0001523	retinoid metabolic process	29/1127	108/18862	3.98822e-12	3.37379e-10	2.43557e-10	5919/348/5950/216/1645/7276/336/4035/8644/1109/345/1562/124/1382/57016/1558/195814/1577/2719/6382/125/1551/8608/1543/337/231/157506/59342/57104	29
BP	GO:0019216	regulation of lipid metabolic process	62/1127	402/18862	5.27882e-12	4.39685e-10	3.17413e-10	5919/718/375/998/6647/3417/341/10399/348/55004/3158/5660/824/5901/123/8611/2180/5244/11261/29103/51599/37/336/7108/34/8644/949/345/1579/6822/2264/7069/8721/19/301/183/5154/53345/3491/2181/185/2168/9971/1958/5105/5166/476/57678/13/60481/27063/51280/7296/27242/1543/337/857/157506/12/2321/57104/27329	62
BP	GO:0050819	negative regulation of coagulation	20/1127	52/18862	5.73795e-12	4.70686e-10	3.39793e-10	2243/2266/2244/1361/350/348/710/3827/3273/3818/2160/308/7057/1906/5154/7448/7103/7035/5340/2161	20
BP	GO:0072376	protein activation cascade	15/1127	28/18862	7.23254e-12	5.73134e-10	4.13751e-10	2243/2266/2244/350/2335/710/3827/3818/462/2160/708/7035/2161/2159/2	15
BP	GO:0072378	blood coagulation, fibrin clot formation	15/1127	28/18862	7.23254e-12	5.73134e-10	4.13751e-10	2243/2266/2244/350/2335/710/3827/3818/462/2160/708/7035/2161/2159/2	15
BP	GO:0015980	energy derivation by oxidation of organic compounds	49/1127	278/18862	7.31506e-12	5.73134e-10	4.13751e-10	4541/27089/2108/2778/801/5499/3417/3479/4538/27069/664/5162/847/4190/4725/7388/4519/4513/5236/6390/4514/4539/4537/4706/4512/7384/29103/3418/37/3146/6389/4191/4540/51142/4535/4720/5167/2538/2632/7386/3953/27232/3572/48/3481/7385/23530/5836/1327	49
BP	GO:0046688	response to copper ion	18/1127	42/18862	7.4103e-12	5.73134e-10	4.13751e-10	4502/6647/4501/4499/4495/4493/4519/4494/4496/4512/351/6284/5066/5621/6649/1543/4780/3383	18
BP	GO:0046395	carboxylic acid catabolic process	45/1127	243/18862	9.32835e-12	7.1132e-10	5.13509e-10	2108/3242/2805/10247/3081/1892/144193/38/54363/10449/5009/1428/5226/51084/37/2184/2806/5444/34/51181/1579/6822/224/11112/5446/8310/2168/189/5105/1036/80150/6898/3032/3176/8529/5092/10455/27165/130013/2752/57834/197257/23576/10993/5264	45
BP	GO:0030195	negative regulation of blood coagulation	19/1127	48/18862	1.06531e-11	8.01053e-10	5.78288e-10	2243/2266/2244/1361/350/348/710/3827/3273/3818/2160/7057/1906/5154/7448/7103/7035/5340/2161	19
BP	GO:0052126	movement in host environment	37/1127	175/18862	1.18533e-11	8.79095e-10	6.34628e-10	682/5478/10581/325/1499/10410/5034/3921/3694/7852/1948/3916/3673/949/3956/3685/1500/858/9074/1956/3853/1514/7037/558/8673/59272/3123/3688/81603/1803/2934/6554/9076/3383/81607/857/10346	37
BP	GO:1900047	negative regulation of hemostasis	19/1127	49/18862	1.64311e-11	1.20214e-09	8.67836e-10	2243/2266/2244/1361/350/348/710/3827/3273/3818/2160/7057/1906/5154/7448/7103/7035/5340/2161	19
BP	GO:0046034	ATP metabolic process	52/1127	313/18862	1.6951e-11	1.22364e-09	8.83356e-10	3939/4541/2597/27089/7167/226/7114/506/3479/4538/27069/229/518/4508/516/4725/7388/4519/4513/5236/2027/4514/9551/4539/4537/522/4706/4512/7384/29103/5223/6389/4540/51142/4535/5230/4720/2023/481/204/5167/7386/1346/351/283120/2203/5214/498/7385/2026/5315/1327	52
BP	GO:0002526	acute inflammatory response	28/1127	107/18862	1.83999e-11	1.31075e-09	9.46245e-10	718/5004/6291/5265/6288/3240/6289/1401/325/445/2335/3929/3818/5005/462/197/9536/2950/8876/3250/3572/1773/2625/2161/3383/12/23780/57817	28
BP	GO:0046686	response to cadmium ion	21/1127	61/18862	2.05057e-11	1.44179e-09	1.04084e-09	567/2805/4502/6647/4501/847/6648/4499/4495/4493/4519/7341/4494/4496/8644/5595/6678/1956/3725/2353/2934	21
BP	GO:0016054	organic acid catabolic process	46/1127	258/18862	2.14221e-11	1.48692e-09	1.07342e-09	2108/3242/2805/10247/3081/1892/144193/38/54363/10449/5009/1428/5226/51084/37/2184/2806/5444/34/51181/1579/6822/224/11112/5446/8310/2168/189/5105/1036/80150/6898/3032/3176/8529/5092/10455/55258/27165/130013/2752/57834/197257/23576/10993/5264	46
BP	GO:0006690	icosanoid metabolic process	30/1127	123/18862	2.43816e-11	1.66167e-09	1.19958e-09	11343/5445/1571/1645/2052/1646/5444/1906/8644/9536/5595/1109/1579/22949/2950/301/1562/873/5446/2938/1558/2876/8529/5319/3248/8824/1555/1543/1559/57834	30
BP	GO:2000379	positive regulation of reactive oxygen species metabolic process	27/1127	101/18862	2.45537e-11	1.66167e-09	1.19958e-09	6647/1401/445/1191/6648/4513/7057/1906/1535/8644/2950/183/4835/140823/6526/1956/185/283120/3320/1026/59272/2150/1647/23530/4780/3383/23576	27
BP	GO:0046364	monosaccharide biosynthetic process	26/1127	97/18862	5.37124e-11	3.59011e-09	2.59174e-09	2597/7167/226/2805/5950/229/4190/5236/2027/5226/5223/4191/2806/5230/2023/2538/5105/3953/27232/2203/6576/231/2026/7086/10993/6888	26
BP	GO:0000302	response to reactive oxygen species	41/1127	224/18862	1.13962e-10	7.52426e-09	5.43184e-09	3939/4541/3240/6647/10399/5052/6188/348/664/847/6648/7295/1728/1571/824/7168/4540/1906/8644/5595/7001/2950/301/140823/1956/2168/8754/1938/558/3725/283120/2876/2353/6382/6649/10935/4780/337/51765/5074/10516	41
BP	GO:0033559	unsaturated fatty acid metabolic process	28/1127	115/18862	1.17271e-10	7.64947e-09	5.52223e-09	11343/1571/1645/2180/2052/1646/1906/8644/9536/5595/1109/1579/22949/2950/301/1562/873/2938/1558/60481/2876/8529/3248/8824/1555/1543/1559/57834	28
BP	GO:0006641	triglyceride metabolic process	27/1127	108/18862	1.31388e-10	8.46824e-09	6.11331e-09	718/11343/350/341/348/847/1373/1571/2180/11145/336/949/345/2182/7069/2538/2168/5105/57678/13/2876/2169/200879/337/857/57104/2173	27
BP	GO:0042445	hormone metabolic process	40/1127	218/18862	1.77769e-10	1.13229e-08	8.17409e-09	8630/3249/7363/5950/216/1645/1428/7276/1889/1646/8644/1109/949/6822/1562/124/1382/140606/1958/1514/57016/1558/476/195814/1577/59272/125/1551/2625/8608/1543/5045/231/1559/3283/157506/27344/7364/59342/57104	40
BP	GO:0051701	biological process involved in interaction with host	40/1127	219/18862	2.05231e-10	1.292e-08	9.32707e-09	682/5478/10581/325/1499/10410/5034/3921/3694/7852/1948/3916/3673/949/3956/3685/1500/858/9074/5272/1956/3853/598/1514/7037/558/8673/59272/3123/3688/114770/81603/1803/2934/6554/9076/3383/81607/857/10346	40
BP	GO:0031589	cell-substrate adhesion	54/1127	359/18862	3.27189e-10	2.03609e-08	1.46987e-08	967/2243/5861/2266/998/2244/71/387/10109/2335/3273/5034/3675/4192/3694/708/7057/4035/10085/6281/3673/2316/3728/3956/255743/3685/1308/1029/27076/3037/8826/3397/3911/3491/7448/8754/4070/3913/5880/3914/558/4680/5764/7791/3688/5340/10551/10232/6422/55679/4323/27329/10516/3912	54
BP	GO:0034754	cellular hormone metabolic process	30/1127	136/18862	3.49273e-10	2.14883e-08	1.55126e-08	8630/7363/5950/216/1645/7276/1889/1646/8644/1109/949/1562/124/1382/1958/57016/1558/195814/1577/125/1551/8608/1543/231/1559/3283/157506/7364/59342/57104	30
BP	GO:0097305	response to alcohol	41/1127	233/18862	3.99115e-10	2.42788e-08	1.75271e-08	801/6647/4538/5950/1499/847/6648/929/6191/4519/1728/1571/1582/2720/808/1646/2806/8644/595/2782/3728/2950/8431/6678/1366/1036/9353/1938/1026/2353/2934/3248/10400/6554/2625/9076/6422/3383/51150/3283/57817	41
BP	GO:0006953	acute-phase response	17/1127	46/18862	4.69629e-10	2.82508e-08	2.03945e-08	5004/6291/5265/6288/3240/6289/1401/325/445/2335/3929/5005/197/9536/12/23780/57817	17
BP	GO:0070482	response to oxygen levels	56/1127	385/18862	5.58764e-10	3.32434e-08	2.39987e-08	3939/537/4538/6233/283/664/847/4508/6648/9550/4519/100133941/824/10449/5034/5693/5352/4540/51142/677/7057/7852/5230/7009/2023/1906/378938/6923/3673/2782/481/4000/5690/2168/2627/1958/5105/5066/5351/768/5764/6781/1026/1803/27063/7316/6649/1543/6422/4780/3383/857/5315/23576/4323/665	56
BP	GO:1903036	positive regulation of response to wounding	21/1127	72/18862	6.91831e-10	4.06582e-08	2.93515e-08	71/1361/350/3273/4192/3146/7057/7852/4035/2316/7001/301/2896/7448/5764/3688/5340/9076/2161/4780/1364	21
BP	GO:0006119	oxidative phosphorylation	31/1127	148/18862	6.98413e-10	4.06582e-08	2.93515e-08	4541/27089/506/4538/27069/518/4508/516/4725/7388/4519/4513/4514/9551/4539/4537/522/4706/4512/7384/29103/6389/4540/51142/4535/4720/7386/1346/498/7385/1327	31
BP	GO:0001666	response to hypoxia	52/1127	348/18862	8.85824e-10	5.10197e-08	3.68316e-08	3939/4538/6233/283/664/847/6648/4519/100133941/824/10449/5034/5693/5352/4540/51142/677/7057/7852/5230/7009/2023/1906/378938/6923/3673/2782/481/4000/5690/2168/2627/1958/5105/5066/5351/768/5764/6781/1803/27063/7316/6649/1543/6422/4780/3383/857/5315/23576/4323/665	52
BP	GO:1902652	secondary alcohol metabolic process	32/1127	158/18862	9.12793e-10	5.20196e-08	3.75535e-08	6647/3417/348/847/3158/319/10449/5901/54657/3418/37/5444/336/1727/7108/949/6822/19/8431/9971/351/3953/9784/57678/25987/29881/6307/337/1559/8542/23780/27329	32
BP	GO:0046916	cellular transition metal ion homeostasis	27/1127	118/18862	1.1182e-09	6.30619e-08	4.5525e-08	2512/375/1356/4502/6647/537/4501/4499/9550/4495/3263/4493/2495/4494/4496/30061/351/148738/7037/283375/5621/3934/48/7018/9843/64116/57817	27
BP	GO:0061045	negative regulation of wound healing	21/1127	74/18862	1.209e-09	6.74796e-08	4.87142e-08	2243/2266/2244/1361/325/350/348/710/3827/3273/3818/2160/7057/1906/5154/135228/7448/7103/7035/5340/2161	21
BP	GO:0031639	plasminogen activation	12/1127	23/18862	1.42961e-09	7.89788e-08	5.70156e-08	3249/2243/2266/2244/1361/350/3818/2160/7057/5230/2023/2161	12
BP	GO:0051604	protein maturation	46/1127	293/18862	1.67523e-09	9.16128e-08	6.61362e-08	3249/2243/2266/2244/3240/1361/350/715/2280/831/3818/4627/1363/4706/1889/2160/6659/7057/5230/871/2023/80218/1510/1512/10440/3250/64065/148738/1514/1369/26022/5621/4102/59272/2934/3329/2161/5045/81689/27344/91289/4323/3083/8728/444/9528	46
BP	GO:0071276	cellular response to cadmium ion	15/1127	38/18862	1.69508e-09	9.17714e-08	6.62507e-08	4502/6647/4501/4499/4495/4493/7341/4494/4496/8644/5595/1956/3725/2353/2934	15
BP	GO:0062197	cellular response to chemical stress	51/1127	347/18862	2.30097e-09	1.23341e-07	8.90412e-08	5478/4257/6647/10399/5052/6188/2547/664/847/10550/6648/7295/1728/5034/9588/7168/7520/51142/677/1535/8644/5595/7001/2950/8876/301/140823/1956/2168/2878/2882/6421/558/135112/3725/283120/493869/2876/2877/2353/7296/6649/3315/10935/4780/337/231/857/51765/5074/10516	51
BP	GO:0019319	hexose biosynthetic process	23/1127	91/18862	2.42275e-09	1.28596e-07	9.28346e-08	2597/7167/226/2805/5950/229/4190/5236/2027/5223/4191/2806/5230/2023/2538/5105/3953/27232/2203/6576/231/2026/10993	23
BP	GO:1901605	alpha-amino acid metabolic process	35/1127	191/18862	2.52308e-09	1.32621e-07	9.57405e-08	3242/2805/10247/3081/445/144193/1373/38/5009/1428/5352/92292/2184/570/2806/9056/9971/189/1036/27232/23743/80150/6898/1503/5092/10400/143941/55258/64116/27165/130013/2752/23576/4953/10993	35
BP	GO:2000377	regulation of reactive oxygen species metabolic process	35/1127	192/18862	2.91182e-09	1.51583e-07	1.09429e-07	3240/6647/1401/445/1191/664/6648/4513/7416/7057/1906/1535/8644/7001/2950/183/4835/140823/6526/5446/1956/185/5880/283120/3320/1026/59272/2150/1647/23530/4780/3383/857/23576/10516	35
BP	GO:0036293	response to decreased oxygen levels	52/1127	360/18862	2.96132e-09	1.52691e-07	1.10229e-07	3939/4538/6233/283/664/847/6648/4519/100133941/824/10449/5034/5693/5352/4540/51142/677/7057/7852/5230/7009/2023/1906/378938/6923/3673/2782/481/4000/5690/2168/2627/1958/5105/5066/5351/768/5764/6781/1803/27063/7316/6649/1543/6422/4780/3383/857/5315/23576/4323/665	52
BP	GO:0034599	cellular response to oxidative stress	46/1127	299/18862	3.25156e-09	1.65176e-07	1.19242e-07	5478/4257/6647/10399/5052/6188/664/847/10550/6648/7295/1728/5034/9588/7168/51142/1535/8644/5595/7001/2950/8876/301/140823/1956/2168/2878/2882/6421/558/135112/3725/283120/493869/2876/2877/2353/7296/6649/3315/10935/4780/337/51765/5074/10516	46
BP	GO:0043687	post-translational protein modification	52/1127	361/18862	3.26447e-09	1.65176e-07	1.19242e-07	718/2243/5861/1356/2266/5265/10618/348/334/2335/3827/213/5034/462/197/5693/26118/174/54587/3487/336/2200/11098/6923/813/3956/54461/10272/6694/5690/1471/3491/1462/351/55884/3913/4240/5931/2719/7018/51280/10232/23363/3484/7076/8542/25870/57104/3895/8766/11167/3912	52
BP	GO:0048545	response to steroid hormone	49/1127	330/18862	3.3625e-09	1.68561e-07	1.21686e-07	2805/801/3417/445/5176/1655/1373/2720/808/4537/8611/3146/677/7057/1906/8644/595/2950/56937/301/10424/6678/1956/8754/189/5105/1369/5066/1036/9353/1244/476/57678/5764/7035/6898/6781/1026/3176/5931/2353/6382/3485/9076/6422/3383/857/3283/1364	49
BP	GO:0006869	lipid transport	61/1127	461/18862	4.16593e-09	2.0692e-07	1.49378e-07	350/341/348/1191/5950/3929/10550/366/55004/10599/5660/1582/319/10809/1645/123/2180/5244/5320/7057/2806/5444/336/4035/1906/9536/1109/949/345/1579/302/3685/2182/7069/19/301/183/8431/2181/185/4833/2168/140606/9971/1244/2169/8529/3688/5319/25987/29881/6554/3783/5045/337/27165/857/51454/8542/23780/54407	61
BP	GO:0034308	primary alcohol metabolic process	23/1127	94/18862	4.78167e-09	2.35345e-07	1.69898e-07	3479/5950/216/54363/1645/7276/1646/8644/1109/6822/224/124/57016/1558/195814/1577/125/1551/8608/1543/231/157506/57104	23
BP	GO:0042730	fibrinolysis	12/1127	25/18862	4.91647e-09	2.398e-07	1.73114e-07	2243/2266/2244/1361/350/710/3273/3818/2160/7057/5340/2161	12
BP	GO:0016485	protein processing	38/1127	224/18862	5.00674e-09	2.42022e-07	1.74718e-07	3249/2243/2266/2244/3240/1361/350/715/831/3818/4627/1363/1889/2160/7057/5230/2023/1510/1512/10440/3250/64065/148738/1514/1369/26022/5621/4102/59272/2934/2161/5045/27344/4323/3083/8728/444/9528	38
BP	GO:0045471	response to ethanol	27/1127	126/18862	5.16915e-09	2.47662e-07	1.78789e-07	6647/4538/5950/847/6648/929/6191/4519/1728/1571/2806/595/2950/8431/6678/1366/1036/1938/2934/3248/10400/6554/2625/9076/3383/51150/57817	27
BP	GO:0045333	cellular respiration	34/1127	187/18862	5.23788e-09	2.48753e-07	1.79577e-07	4541/27089/2108/3417/4538/27069/664/5162/847/4190/4725/7388/4519/4513/6390/4514/4539/4537/4706/4512/7384/29103/3418/6389/4191/4540/51142/4535/4720/7386/48/7385/23530/1327	34
BP	GO:0016053	organic acid biosynthetic process	49/1127	335/18862	5.5744e-09	2.62433e-07	1.89453e-07	11343/2805/341/445/1373/1571/1582/5009/4706/5352/37/570/2806/1906/8644/9536/1109/345/1579/2264/2950/301/873/7358/2181/9971/189/5166/1036/23743/1558/60481/5319/2948/3248/200879/55258/1543/337/348158/27165/130013/1559/2752/5315/57834/157506/10003/10993	49
BP	GO:0006790	sulfur compound metabolic process	53/1127	378/18862	5.98859e-09	2.79502e-07	2.01775e-07	4257/6647/3417/5162/10550/3158/1373/38/2720/347734/2180/3423/570/79586/9027/25874/9060/100131187/6822/2950/5167/2182/3313/9022/2331/7358/1462/2181/1836/9061/2938/117145/189/5166/1036/27232/23743/1244/57678/4144/60481/2876/2948/2939/10400/3074/6576/4780/348158/23382/81689/4060/2941	53
BP	GO:0035722	interleukin-12-mediated signaling pathway	16/1127	47/18862	6.14019e-09	2.8172e-07	2.03377e-07	5478/1072/375/998/6175/6647/6648/5034/3936/3181/302/3313/3185/9987/2939/6888	16
BP	GO:0042572	retinol metabolic process	16/1127	47/18862	6.14019e-09	2.8172e-07	2.03377e-07	5950/216/7276/8644/124/57016/1558/195814/1577/125/1551/8608/1543/231/157506/57104	16
BP	GO:0120254	olefinic compound metabolic process	26/1127	119/18862	6.43031e-09	2.92552e-07	2.11196e-07	11343/1571/1645/2180/2052/1646/8644/9536/5595/1109/1579/2950/1562/873/2938/1958/1558/195814/60481/2876/8529/1555/1543/1559/57834/157506	26
BP	GO:0006094	gluconeogenesis	22/1127	88/18862	6.69859e-09	3.01771e-07	2.17851e-07	2597/7167/226/2805/5950/229/4190/5236/2027/5223/4191/2806/5230/2023/2538/5105/3953/27232/2203/6576/2026/10993	22
BP	GO:1903793	positive regulation of anion transport	62/1127	478/18862	6.74441e-09	3.01771e-07	2.17851e-07	5478/7534/718/60/2243/375/2266/998/2244/3479/10399/348/5950/283/10134/54741/1582/5901/55450/2180/2040/5244/11261/6659/5444/4035/25874/1906/59286/9536/2810/2316/1579/3728/302/2182/19/8431/2181/10971/1956/7529/9971/8754/5880/5621/7430/8673/59272/8529/3123/3688/5319/22885/2719/2150/27063/51714/3783/4780/857/222546	62
BP	GO:0006638	neutral lipid metabolic process	28/1127	136/18862	6.93709e-09	3.05345e-07	2.20431e-07	718/11343/350/341/348/283/847/1373/1571/2180/11145/336/949/345/2182/7069/2538/2168/5105/57678/13/2876/2169/200879/337/857/57104/2173	28
BP	GO:0006639	acylglycerol metabolic process	28/1127	136/18862	6.93709e-09	3.05345e-07	2.20431e-07	718/11343/350/341/348/283/847/1373/1571/2180/11145/336/949/345/2182/7069/2538/2168/5105/57678/13/2876/2169/200879/337/857/57104/2173	28
BP	GO:0006959	humoral immune response	53/1127	380/18862	7.20341e-09	3.1451e-07	2.27048e-07	3075/5919/716/2597/3078/725/722/718/2243/735/2244/1361/1401/325/733/729/715/1191/710/6480/10747/283/731/732/3273/3263/116842/3426/6170/3151/708/5320/727/966/140823/10406/2627/3853/7448/1369/3934/3123/5319/114770/5225/7018/5196/2625/27242/1672/132299/78989/2	53
BP	GO:0022617	extracellular matrix disassembly	21/1127	81/18862	7.28544e-09	3.15547e-07	2.27797e-07	682/3249/3818/823/824/3936/6624/4035/649/826/2264/1471/1514/7077/5340/1803/5654/5045/7076/4323/2	21
BP	GO:0001676	long-chain fatty acid metabolic process	26/1127	120/18862	7.74899e-09	3.32961e-07	2.40368e-07	11343/1571/2180/2052/8644/9536/5595/1579/2950/2182/1562/873/2181/2938/5066/1558/60481/2876/8529/2948/3248/1555/1543/348158/1559/57834	26
BP	GO:0019835	cytolysis	13/1127	31/18862	8.67296e-09	3.69728e-07	2.6691e-07	3078/735/733/729/3929/731/732/3273/5320/727/140823/3853/8542	13
BP	GO:1903035	negative regulation of response to wounding	22/1127	90/18862	1.04994e-08	4.44092e-07	3.20595e-07	2243/2266/2244/1361/325/350/348/710/3827/3273/3818/4192/2160/7057/1906/5154/135228/7448/7103/7035/5340/2161	22
BP	GO:0007584	response to nutrient	31/1127	165/18862	1.10387e-08	4.62811e-07	3.34108e-07	3939/445/847/6648/4519/1728/462/2180/5009/8644/595/3673/2950/2182/6678/2181/1956/9971/1938/5764/6781/2934/10400/2348/3485/1543/23530/6422/5315/1327/57817	31
BP	GO:0001667	ameboidal-type cell migration	61/1127	473/18862	1.11129e-08	4.62811e-07	3.34108e-07	7114/506/350/57142/348/387/5176/2335/5216/3273/11171/309/4627/3675/708/3146/7057/6997/1948/1906/152007/3673/949/3728/3037/301/183/1512/3397/2066/8828/3911/6678/2896/8754/4070/10512/9353/5764/6781/2876/6286/3688/1803/7869/2719/1647/8482/2348/2625/498/3315/11221/91862/4780/2752/7076/100506013/8766/11167/5606	61
BP	GO:0055076	transition metal ion homeostasis	28/1127	139/18862	1.15192e-08	4.76069e-07	3.43679e-07	2512/567/375/1356/4502/6647/537/4501/4499/9550/4495/3263/4493/2495/4494/4496/30061/351/148738/7037/283375/5621/3934/48/7018/9843/64116/57817	28
BP	GO:0071349	cellular response to interleukin-12	16/1127	49/18862	1.22083e-08	5.00724e-07	3.61478e-07	5478/1072/375/998/6175/6647/6648/5034/3936/3181/302/3313/3185/9987/2939/6888	16
BP	GO:0042775	mitochondrial ATP synthesis coupled electron transport	23/1127	99/18862	1.38875e-08	5.65314e-07	4.08106e-07	4541/27089/4538/27069/4725/7388/4519/4513/4514/4539/4537/4706/4512/7384/29103/6389/4540/51142/4535/4720/7386/7385/1327	23
BP	GO:0008203	cholesterol metabolic process	29/1127	149/18862	1.43225e-08	5.78672e-07	4.17749e-07	6647/348/847/3158/319/10449/5901/37/5444/336/1727/7108/949/6822/19/8431/9971/351/3953/9784/57678/25987/29881/6307/337/1559/8542/23780/27329	29
BP	GO:0042743	hydrogen peroxide metabolic process	17/1127	56/18862	1.48842e-08	5.92524e-07	4.27749e-07	3240/6647/5052/847/6648/4513/9588/1535/7001/1956/2878/5880/2876/10935/1543/23530/337	17
BP	GO:0071825	protein-lipid complex subunit organization	17/1127	56/18862	1.48842e-08	5.92524e-07	4.27749e-07	375/341/348/213/5034/5320/336/949/649/345/19/183/2181/185/9971/337/274	17
BP	GO:0051702	biological process involved in interaction with symbiont	22/1127	92/18862	1.62252e-08	6.41193e-07	4.62883e-07	2597/3078/1072/3249/1401/325/348/2335/3273/64710/2040/302/858/140823/3853/3725/2876/5340/2150/5196/3329/8542	22
BP	GO:0070671	response to interleukin-12	16/1127	50/18862	1.6963e-08	6.63253e-07	4.78809e-07	5478/1072/375/998/6175/6647/6648/5034/3936/3181/302/3313/3185/9987/2939/6888	16
BP	GO:0042773	ATP synthesis coupled electron transport	23/1127	100/18862	1.70285e-08	6.63253e-07	4.78809e-07	4541/27089/4538/27069/4725/7388/4519/4513/4514/4539/4537/4706/4512/7384/29103/6389/4540/51142/4535/4720/7386/7385/1327	23
BP	GO:0019693	ribose phosphate metabolic process	57/1127	435/18862	1.91783e-08	7.41654e-07	5.35407e-07	3939/2597/7167/226/7114/506/3479/229/518/5162/4508/516/3158/38/4513/5236/2027/5901/9551/347734/2180/522/5223/570/5230/2023/25874/9060/2987/6822/204/5167/2182/2181/4907/4833/1836/9061/351/117145/5166/57678/283120/2203/60481/5214/1503/2984/53354/498/6576/5836/348158/2026/5315/7086/11163	57
BP	GO:0046394	carboxylic acid biosynthetic process	47/1127	327/18862	1.99349e-08	7.65444e-07	5.52582e-07	11343/2805/341/445/1571/1582/5009/4706/5352/37/570/2806/1906/8644/9536/1109/345/1579/2264/2950/301/873/7358/2181/9971/189/5166/23743/1558/60481/5319/2948/3248/200879/55258/1543/337/348158/27165/130013/1559/2752/5315/57834/157506/10003/10993	47
BP	GO:0022904	respiratory electron transport chain	25/1127	117/18862	2.01589e-08	7.68593e-07	5.54855e-07	4541/27089/2108/4538/27069/4725/7388/4519/4513/6390/4514/4539/4537/4706/4512/7384/29103/6389/4540/51142/4535/4720/7386/7385/1327	25
BP	GO:0045785	positive regulation of cell adhesion	56/1127	425/18862	2.10207e-08	7.95848e-07	5.74531e-07	2243/2266/998/2244/6288/3479/6188/387/10109/2335/3273/100133941/5034/3675/4192/7168/6659/708/3146/10085/6281/3673/2316/3728/3956/7052/255743/3685/10272/8876/3037/8826/301/3491/8754/5105/7037/57678/4680/5764/3572/3123/1803/3481/10551/2625/3329/11221/3485/6422/3383/857/3280/55679/64332/8728	56
BP	GO:0072521	purine-containing compound metabolic process	59/1127	460/18862	2.36503e-08	8.89187e-07	6.41913e-07	3939/2597/7167/226/7114/506/3479/229/518/5162/4508/516/3158/38/4513/5236/2027/5901/9551/347734/2180/522/7276/10591/5223/570/5230/2023/25874/9060/2987/6822/204/5167/2182/2181/4907/4833/1836/9061/351/117145/5166/27232/57678/283120/2203/60481/2876/5214/10400/2984/53354/498/6576/348158/2026/5315/11163	59
BP	GO:0016042	lipid catabolic process	48/1127	340/18862	2.50883e-08	9.36746e-07	6.76246e-07	5919/8630/2108/11343/3417/341/348/1892/1373/38/54363/3290/10449/9588/37/5320/11145/336/4035/34/8644/949/345/1579/6822/224/8310/2168/57016/5105/9784/13/3032/2169/8529/5319/57733/8824/200879/10455/3074/337/57834/5920/57104/5264/27329/2173	48
BP	GO:0006826	iron ion transport	20/1127	79/18862	2.56974e-08	9.52917e-07	6.8792e-07	2512/567/1356/9296/537/9550/3273/3263/8992/2495/10424/30061/7037/3934/7018/9843/64116/533/529/57817	20
BP	GO:0050673	epithelial cell proliferation	56/1127	428/18862	2.69241e-08	9.91613e-07	7.15855e-07	567/3249/998/1361/350/3479/57142/348/5176/2267/283/116844/11171/4192/3146/677/7057/3487/595/949/2810/858/3037/55959/135228/3397/8828/2069/6678/255324/1956/185/2896/5764/195814/2876/2719/51162/3481/2625/498/11221/91862/5654/374/9076/9500/6422/857/3280/55679/100506013/2321/4323/3912/2173	56
BP	GO:0031667	response to nutrient levels	58/1127	451/18862	2.82873e-08	1.03478e-06	7.47019e-07	3939/5919/6647/348/445/664/847/6648/1373/4519/1728/213/1582/462/2180/5009/3920/29103/5444/8644/595/3673/5595/2950/2182/7071/2538/6678/2181/1956/1981/9971/5105/5166/283375/1938/3875/3725/5764/3178/6781/1026/2934/10400/6554/2348/3485/1543/23530/6422/4780/3383/5315/51765/27344/1327/54407/57817	58
BP	GO:0071827	plasma lipoprotein particle organization	16/1127	52/18862	3.18739e-08	1.15816e-06	8.36084e-07	375/341/348/213/5034/5320/336/949/649/345/19/183/2181/185/9971/337	16
BP	GO:0009150	purine ribonucleotide metabolic process	54/1127	408/18862	3.22975e-08	1.16572e-06	8.41547e-07	3939/2597/7167/226/7114/506/3479/229/518/5162/4508/516/3158/38/4513/5236/2027/5901/9551/347734/2180/522/5223/570/5230/2023/25874/9060/2987/6822/204/5167/2182/2181/4907/4833/1836/9061/351/117145/5166/57678/283120/2203/60481/5214/2984/53354/498/6576/348158/2026/5315/11163	54
BP	GO:0031099	regeneration	33/1127	192/18862	3.66101e-08	1.30765e-06	9.44005e-07	1361/3479/4837/4519/2027/3936/4192/570/4035/595/2316/2950/55959/301/2066/8431/9315/1956/2896/3913/558/5764/2876/1026/688/7104/2934/2348/11221/9076/3484/5315/57817	33
BP	GO:0009991	response to extracellular stimulus	60/1127	477/18862	3.67127e-08	1.30765e-06	9.44005e-07	3939/5919/6647/348/445/664/847/6648/1373/4519/1728/213/1582/462/2180/5009/3920/29103/5444/8644/595/3673/5595/2950/2182/7071/2538/6678/2181/1956/1981/9971/5105/5166/283375/1938/3875/558/3725/5764/3178/6781/1026/2353/2934/10400/6554/2348/3485/1543/23530/6422/4780/3383/5315/51765/27344/1327/54407/57817	60
BP	GO:0016125	sterol metabolic process	30/1127	165/18862	4.12413e-08	1.45935e-06	1.05352e-06	6647/348/847/3158/1582/319/10449/5901/37/5444/336/1727/7108/949/6822/19/8431/9971/351/3953/9784/57678/25987/29881/6307/337/1559/8542/23780/27329	30
BP	GO:0005996	monosaccharide metabolic process	41/1127	272/18862	4.16871e-08	1.46555e-06	1.05799e-06	2597/7167/226/2805/5499/3479/5950/6515/229/5162/4190/216/5236/2720/2027/5226/5223/3146/4191/3487/2806/5230/1727/2023/51181/5167/2538/5105/5166/3953/27232/2203/5214/3481/6576/231/2026/5315/7086/10993/6888	41
BP	GO:0007568	aging	44/1127	304/18862	4.57505e-08	1.59802e-06	1.15363e-06	567/6647/445/5176/4538/9516/847/4508/6648/1284/1728/2027/4512/4035/1906/5595/3159/4000/3727/1029/6926/140823/351/5105/1938/5621/3725/7077/1026/1075/55170/2353/2934/3485/9076/1543/4780/3383/3484/7076/5074/22943/57817/1644	44
BP	GO:0048732	gland development	54/1127	413/18862	4.88566e-08	1.69557e-06	1.22405e-06	3249/998/1361/6647/57142/445/5176/2267/1373/5660/823/4513/462/5009/887/4192/51599/570/2806/6997/595/3673/5595/7001/7052/10272/55959/301/5154/6926/2066/3911/1956/2627/5105/10512/5066/1036/3875/5764/2876/6599/3481/2625/8543/9076/1543/6422/857/3280/55679/5315/1999/57817	54
BP	GO:0044706	multi-multicellular organism process	34/1127	204/18862	5.00385e-08	1.72553e-06	1.24568e-06	682/3020/259/3021/6647/6159/824/3675/708/2806/1906/3673/5595/2182/81671/10916/3726/5066/1244/5764/6781/2353/3248/10935/3485/1543/3074/231/7076/100506013/1364/7216/23780/54407	34
BP	GO:0009259	ribonucleotide metabolic process	55/1127	425/18862	5.22525e-08	1.77206e-06	1.27927e-06	3939/2597/7167/226/7114/506/3479/229/518/5162/4508/516/3158/38/4513/5236/2027/5901/9551/347734/2180/522/5223/570/5230/2023/25874/9060/2987/6822/204/5167/2182/2181/4907/4833/1836/9061/351/117145/5166/57678/283120/2203/60481/5214/1503/2984/53354/498/6576/348158/2026/5315/11163	55
BP	GO:0034329	cell junction assembly	55/1127	425/18862	5.22525e-08	1.77206e-06	1.27927e-06	389/60/998/71/977/9948/387/667/2335/1499/3273/6624/51599/7057/54751/4035/1948/6281/3673/3556/2316/3728/1500/3852/1308/8826/183/9074/3909/2066/2705/1981/9971/3918/351/81671/1366/3914/64284/79983/59272/1004/91862/9076/6422/23363/2562/857/7094/55679/23654/1364/84189/4323/2318	55
BP	GO:2001233	regulation of apoptotic signaling pathway	48/1127	348/18862	5.23698e-08	1.77206e-06	1.27927e-06	5478/2243/2266/2244/5499/6647/3479/10399/6188/7417/1191/27069/3190/6648/10134/6135/6201/10449/5034/4055/7057/7009/2023/7001/2950/3685/8876/183/3958/6154/55023/598/8795/6421/4102/2876/1075/51330/7178/5196/3315/6422/4780/90427/3383/857/81618/64114	48
BP	GO:0046390	ribose phosphate biosynthetic process	33/1127	195/18862	5.38447e-08	1.81065e-06	1.30713e-06	226/7114/506/518/5162/4508/516/38/4513/9551/347734/2180/522/2023/25874/9060/204/2182/2181/4833/1836/9061/5166/283120/60481/1503/2984/53354/498/6576/5836/5315/7086	33
BP	GO:0090132	epithelium migration	49/1127	360/18862	5.81094e-08	1.942e-06	1.40195e-06	7114/506/350/57142/348/387/5176/5216/3273/11171/4627/3675/3146/7057/6997/1948/1906/152007/3673/949/3728/3037/301/183/1512/3397/8828/6678/2896/8754/4070/9353/5764/6781/2876/6286/1803/1647/2625/498/3315/11221/91862/4780/2752/100506013/8766/11167/5606	49
BP	GO:0007565	female pregnancy	31/1127	177/18862	6.04178e-08	2.00676e-06	1.4487e-06	682/3020/259/3021/6647/6159/824/3675/708/2806/3673/5595/2182/81671/10916/3726/5066/1244/5764/6781/2353/3248/10935/3485/231/7076/100506013/1364/7216/23780/54407	31
BP	GO:0032908	regulation of transforming growth factor beta1 production	8/1127	12/18862	6.3251e-08	2.08805e-06	1.50739e-06	2280/7057/8710/2627/55353/25987/5045/4060	8
BP	GO:0072001	renal system development	42/1127	288/18862	7.43496e-08	2.43957e-06	1.76115e-06	445/5176/5950/1499/847/79727/100133941/3675/6659/8842/2200/80114/1579/255743/10272/3037/55959/8826/183/5154/1512/1282/3911/8710/185/1958/4070/3913/9353/9784/9245/10409/2719/6382/3248/2625/6422/231/3280/157506/3764/793	42
BP	GO:0050678	regulation of epithelial cell proliferation	50/1127	374/18862	7.57951e-08	2.46121e-06	1.77677e-06	567/3249/998/1361/350/3479/57142/348/5176/283/116844/11171/4192/3146/677/7057/595/2810/858/3037/55959/135228/3397/8828/2069/6678/255324/1956/185/2896/5764/2876/2719/51162/3481/2625/498/11221/91862/5654/374/9076/9500/6422/857/3280/55679/100506013/2321/3912	50
BP	GO:0006163	purine nucleotide metabolic process	56/1127	441/18862	7.59184e-08	2.46121e-06	1.77677e-06	3939/2597/7167/226/7114/506/3479/229/518/5162/4508/516/3158/38/4513/5236/2027/5901/9551/347734/2180/522/10591/5223/570/5230/2023/25874/9060/2987/6822/204/5167/2182/2181/4907/4833/1836/9061/351/117145/5166/57678/283120/2203/60481/2876/5214/2984/53354/498/6576/348158/2026/5315/11163	56
BP	GO:0001655	urogenital system development	45/1127	320/18862	7.68486e-08	2.47654e-06	1.78784e-06	445/5176/5950/1499/847/5660/79727/100133941/3675/6659/8842/2200/80114/1579/255743/10272/3037/55959/8826/301/183/5154/1512/1282/3911/8710/185/1958/4070/3913/9353/9784/9245/10409/2719/6599/6382/3248/2625/6422/231/3280/157506/3764/793	45
BP	GO:0090130	tissue migration	49/1127	365/18862	8.97531e-08	2.87529e-06	2.0757e-06	7114/506/350/57142/348/387/5176/5216/3273/11171/4627/3675/3146/7057/6997/1948/1906/152007/3673/949/3728/3037/301/183/1512/3397/8828/6678/2896/8754/4070/9353/5764/6781/2876/6286/1803/1647/2625/498/3315/11221/91862/4780/2752/100506013/8766/11167/5606	49
BP	GO:0006734	NADH metabolic process	14/1127	43/18862	1.04262e-07	3.32043e-06	2.39705e-06	2597/7167/226/229/4190/1728/2027/5223/4191/5230/2023/5214/2026/5315	14
BP	GO:0032970	regulation of actin filament-based process	51/1127	389/18862	1.05485e-07	3.33973e-06	2.41098e-06	9168/389/375/7114/998/71/832/9948/387/10109/11034/5216/3273/3925/4627/4192/7168/6624/4035/1906/684/6281/29766/2316/3728/822/8826/5154/3397/22836/4070/10458/440335/5880/5066/9353/476/391/10095/6781/2150/1832/2934/58527/6711/390/6422/3383/857/274/50853	51
BP	GO:0043434	response to peptide hormone	55/1127	435/18862	1.1469e-07	3.61008e-06	2.60615e-06	682/5919/2805/9296/537/10890/445/847/9550/1373/4519/54741/8992/79746/197/5009/64710/677/2806/1906/2200/2950/5167/7031/858/3727/2538/8826/301/2069/6678/185/6464/5928/9971/1958/55023/10458/5105/5166/1036/1244/5319/6599/3481/4780/3383/3484/857/7076/5315/6272/5573/533/529	55
BP	GO:0010631	epithelial cell migration	48/1127	357/18862	1.15732e-07	3.62182e-06	2.61463e-06	7114/506/350/57142/348/387/5176/5216/3273/11171/4627/3675/3146/7057/6997/1948/1906/152007/3673/949/3728/3037/301/183/1512/3397/8828/6678/2896/8754/4070/9353/5764/6781/2876/6286/1803/1647/2625/498/3315/11221/91862/4780/2752/8766/11167/5606	48
BP	GO:0009060	aerobic respiration	20/1127	86/18862	1.18814e-07	3.69689e-06	2.66882e-06	3417/4538/664/5162/847/4190/7388/4513/6390/4514/4512/7384/3418/6389/4191/4535/48/7385/23530/1327	20
BP	GO:0019058	viral life cycle	47/1127	348/18862	1.36817e-07	4.23272e-06	3.05564e-06	682/5478/10581/5861/998/325/348/6233/10410/5901/5034/3921/64710/2040/3694/7852/1948/684/3916/3673/949/26986/3956/3685/858/9074/5094/3609/1956/1514/7037/558/8673/59272/3123/3688/81603/1803/2934/6554/7316/9076/5045/3383/81607/857/10346	47
BP	GO:0022604	regulation of cell morphogenesis	43/1127	305/18862	1.38614e-07	4.26396e-06	3.07819e-06	1072/389/3249/2243/226/2266/998/2244/832/9948/387/10109/2335/5034/4627/4192/7168/708/7852/54751/6281/2316/3037/301/6678/22836/6284/4070/55023/10458/2011/5880/391/5764/7430/65981/390/3074/23363/3383/55679/23654/1364	43
BP	GO:0032905	transforming growth factor beta1 production	8/1127	13/18862	1.55799e-07	4.76553e-06	3.44028e-06	2280/7057/8710/2627/55353/25987/5045/4060	8
BP	GO:0006898	receptor-mediated endocytosis	45/1127	328/18862	1.59473e-07	4.85049e-06	3.50162e-06	967/567/718/375/259/1173/6288/3240/341/348/1191/3190/929/3263/213/9260/4035/949/84058/345/302/3685/858/1212/6678/1175/3250/7448/1514/7037/9784/81693/7430/3320/3688/7018/2348/58191/4074/10267/857/100506013/8542/22943/78989	45
BP	GO:0009152	purine ribonucleotide biosynthetic process	30/1127	175/18862	1.6042e-07	4.85202e-06	3.50272e-06	226/7114/506/518/5162/4508/516/38/4513/9551/347734/2180/522/2023/25874/9060/204/2182/2181/4833/1836/9061/5166/283120/60481/2984/53354/498/6576/5315	30
BP	GO:0072330	monocarboxylic acid biosynthetic process	35/1127	224/18862	1.6562e-07	4.98149e-06	3.59618e-06	11343/341/1571/1582/4706/37/570/1906/8644/9536/1109/345/2264/2950/301/873/2181/9971/189/5166/1558/60481/5319/2948/3248/200879/55258/1543/337/348158/130013/1559/5315/157506/10993	35
BP	GO:0010811	positive regulation of cell-substrate adhesion	24/1127	121/18862	1.71327e-07	5.12467e-06	3.69955e-06	2243/2266/998/2244/10109/2335/3273/5034/3675/4192/708/10085/6281/2316/3728/255743/3037/8826/3491/4680/5764/10551/6422/55679	24
BP	GO:0006735	NADH regeneration	11/1127	27/18862	1.77134e-07	5.21192e-06	3.76254e-06	2597/7167/226/229/2027/5223/5230/2023/5214/2026/5315	11
BP	GO:0061621	canonical glycolysis	11/1127	27/18862	1.77134e-07	5.21192e-06	3.76254e-06	2597/7167/226/229/2027/5223/5230/2023/5214/2026/5315	11
BP	GO:0061718	glucose catabolic process to pyruvate	11/1127	27/18862	1.77134e-07	5.21192e-06	3.76254e-06	2597/7167/226/229/2027/5223/5230/2023/5214/2026/5315	11
BP	GO:1901606	alpha-amino acid catabolic process	20/1127	88/18862	1.78095e-07	5.21192e-06	3.76254e-06	3242/2805/10247/3081/38/5009/1428/2184/2806/189/1036/80150/6898/5092/55258/27165/130013/2752/23576/10993	20
BP	GO:0072329	monocarboxylic acid catabolic process	25/1127	131/18862	2.08572e-07	6.07101e-06	4.38272e-06	2108/1892/38/54363/10449/5226/51084/37/2184/34/51181/1579/6822/224/5446/8310/2168/189/5105/3032/8529/10455/57834/197257/5264	25
BP	GO:0019369	arachidonic acid metabolic process	16/1127	59/18862	2.26943e-07	6.53549e-06	4.71804e-06	11343/1571/2052/8644/9536/5595/1579/1562/873/1558/2876/8529/1555/1543/1559/57834	16
BP	GO:0090303	positive regulation of wound healing	16/1127	59/18862	2.26943e-07	6.53549e-06	4.71804e-06	71/1361/350/3273/3146/7057/7852/7001/301/7448/3688/5340/9076/2161/4780/1364	16
BP	GO:0007229	integrin-mediated signaling pathway	22/1127	106/18862	2.42141e-07	6.93624e-06	5.00734e-06	967/998/667/2335/4627/3675/3694/3673/2316/3685/3909/3911/8754/5764/7791/1015/3688/8482/7094/55679/7076/27329	22
BP	GO:0009260	ribonucleotide biosynthetic process	31/1127	188/18862	2.46676e-07	7.02897e-06	5.07428e-06	226/7114/506/518/5162/4508/516/38/4513/9551/347734/2180/522/2023/25874/9060/204/2182/2181/4833/1836/9061/5166/283120/60481/1503/2984/53354/498/6576/5315	31
BP	GO:0010810	regulation of cell-substrate adhesion	34/1127	218/18862	2.59112e-07	7.34468e-06	5.3022e-06	2243/2266/998/2244/71/387/10109/2335/3273/5034/3675/4192/708/7057/4035/10085/6281/2316/3728/3956/255743/1029/3037/8826/3491/4070/5880/4680/5764/5340/10551/6422/55679/4323	34
BP	GO:0001822	kidney development	40/1127	280/18862	2.64338e-07	7.45378e-06	5.38096e-06	445/5176/1499/847/79727/100133941/3675/6659/8842/2200/80114/1579/255743/10272/3037/55959/8826/183/5154/1512/3911/8710/185/1958/4070/3913/9353/9784/9245/10409/2719/6382/3248/2625/6422/231/3280/157506/3764/793	40
BP	GO:0061620	glycolytic process through glucose-6-phosphate	11/1127	28/18862	2.76013e-07	7.70275e-06	5.56069e-06	2597/7167/226/229/2027/5223/5230/2023/5214/2026/5315	11
BP	GO:0071280	cellular response to copper ion	11/1127	28/18862	2.76013e-07	7.70275e-06	5.56069e-06	4502/4501/4499/4495/4493/4494/4496/351/5621/1543/4780	11
BP	GO:0071248	cellular response to metal ion	31/1127	189/18862	2.78513e-07	7.72881e-06	5.57951e-06	567/4502/6647/5176/4501/664/4499/4495/4493/7341/1728/4494/4496/1906/8644/5595/3727/10272/8826/1956/351/3726/5621/3725/2203/2353/2934/7018/9076/1543/4780	31
BP	GO:0007597	blood coagulation, intrinsic pathway	9/1127	18/18862	2.79802e-07	7.72881e-06	5.57951e-06	350/710/3827/3818/462/2160/708/2161/2	9
BP	GO:0051099	positive regulation of binding	29/1127	170/18862	2.8614e-07	7.86376e-06	5.67693e-06	567/801/3479/348/1499/2280/6135/7295/5901/808/3925/3146/5444/4035/6281/3673/302/8721/3005/1981/7448/351/5515/51053/2625/65981/10267/857/3280	29
BP	GO:0016051	carbohydrate biosynthetic process	33/1127	209/18862	2.89436e-07	7.87441e-06	5.68462e-06	2597/7167/226/2805/5499/3479/5950/229/4190/5236/2027/5226/5223/4191/2806/5230/2023/5167/2538/2632/3037/5105/3953/27232/2203/3481/6576/55808/231/2026/7086/10993/6888	33
BP	GO:0045216	cell-cell junction organization	33/1127	209/18862	2.89436e-07	7.87441e-06	5.68462e-06	389/60/998/71/9948/387/283/1499/6624/51599/55765/2316/3728/1500/183/9074/64065/2705/9971/1366/79983/1015/59272/2150/1832/1004/91862/9076/81607/857/7094/55679/1364	33
BP	GO:0051098	regulation of binding	47/1127	357/18862	2.93608e-07	7.94797e-06	5.73772e-06	567/3078/60/7114/998/801/5499/3479/10399/348/1499/2280/7341/6135/7295/5901/808/3925/64710/3146/5444/4035/7009/6281/3673/5595/302/8721/3005/3397/57326/1981/7448/351/2011/3725/1026/5515/51053/5092/143941/2625/65981/10267/857/3280/22943	47
BP	GO:0019430	removal of superoxide radicals	10/1127	23/18862	3.11675e-07	8.39506e-06	6.06048e-06	6647/5052/6648/1728/7001/283120/6649/4780/337/10516	10
BP	GO:0006006	glucose metabolic process	33/1127	210/18862	3.24107e-07	8.68671e-06	6.27102e-06	2597/7167/226/2805/5499/3479/5950/229/5162/4190/5236/2027/5223/3146/4191/3487/2806/5230/2023/51181/5167/2538/5105/5166/3953/27232/2203/5214/3481/6576/2026/5315/10993	33
BP	GO:0010632	regulation of epithelial cell migration	41/1127	293/18862	3.30556e-07	8.81591e-06	6.36429e-06	7114/506/350/57142/348/387/5176/5216/3273/11171/3675/3146/7057/6997/1906/152007/3673/949/3728/3037/301/183/1512/8828/6678/2896/8754/4070/9353/5764/6781/1647/2625/498/3315/11221/91862/4780/2752/8766/5606	41
BP	GO:0034446	substrate adhesion-dependent cell spreading	22/1127	108/18862	3.41347e-07	9.05908e-06	6.53984e-06	2243/5861/2266/998/2244/387/10109/2335/5034/4192/708/6281/2316/3685/3037/3911/4070/3913/3914/558/55679/3912	22
BP	GO:0051917	regulation of fibrinolysis	8/1127	14/18862	3.44417e-07	9.09597e-06	6.56647e-06	1361/350/3273/3818/2160/7057/5340/2161	8
BP	GO:0042542	response to hydrogen peroxide	25/1127	135/18862	3.79853e-07	9.98313e-06	7.20692e-06	3939/4541/3240/6647/10399/6188/664/847/6648/7295/1728/824/4540/301/2168/8754/1938/558/3725/2876/6382/10935/4780/51765/5074	25
BP	GO:0032102	negative regulation of response to external stimulus	50/1127	394/18862	3.85132e-07	1.0073e-05	7.27178e-06	2243/2266/2244/6288/1361/6647/325/350/3479/348/5176/710/3827/3273/3818/4192/2160/708/7057/1906/727/7001/2950/5154/135228/5094/5272/4907/2896/9971/7448/10512/9353/7103/3106/7035/4681/2876/3123/5340/1803/7869/8482/2625/11221/5654/2161/9111/57817/2	50
BP	GO:0006839	mitochondrial transport	39/1127	274/18862	4.09208e-07	1.06512e-05	7.68923e-06	7534/506/7417/664/518/4508/516/10134/54741/10449/9551/522/29103/7416/51660/25874/9804/59286/2810/130916/57380/7069/3308/10440/140823/10971/7529/117145/598/5880/3320/22885/498/9131/3329/6576/64116/90427/665	39
BP	GO:0061615	glycolytic process through fructose-6-phosphate	11/1127	29/18862	4.2071e-07	1.08982e-05	7.86753e-06	2597/7167/226/229/2027/5223/5230/2023/5214/2026/5315	11
BP	GO:0097006	regulation of plasma lipoprotein particle levels	21/1127	101/18862	4.38146e-07	1.12958e-05	8.15457e-06	375/1173/341/348/3190/213/5034/5320/336/949/649/345/302/19/183/1175/2181/185/9971/81693/337	21
BP	GO:0002697	regulation of immune effector process	56/1127	465/18862	4.45736e-07	1.1437e-05	8.25652e-06	3075/567/716/3078/725/722/718/735/1361/733/729/715/1191/5950/710/3929/731/732/3263/563/3426/708/3146/336/7009/684/3916/727/966/301/3958/5094/5272/2896/7448/5105/7037/1369/5880/3106/8673/3320/3123/114770/1773/5225/2150/8482/3140/2625/3329/11221/5654/3383/64332/2	56
BP	GO:1905475	regulation of protein localization to membrane	31/1127	194/18862	5.03317e-07	1.28536e-05	9.27912e-06	7534/60/1173/10399/3675/2040/11261/4035/8878/2810/3958/6526/2181/10971/1956/7529/598/5621/391/5764/7430/8673/3688/2719/2934/10551/6711/4323/64114/8766/9528	31
BP	GO:0006801	superoxide metabolic process	17/1127	70/18862	5.40141e-07	1.37292e-05	9.91127e-06	6647/1401/5052/6648/1728/1906/1535/7001/2950/5446/1956/283120/2150/6649/4780/337/10516	17
BP	GO:0002920	regulation of humoral immune response	25/1127	138/18862	5.85131e-07	1.48033e-05	1.06866e-05	3075/716/3078/725/722/718/735/1361/733/729/715/1191/710/731/732/3263/3426/708/727/966/2627/7448/1369/5225/2	25
BP	GO:0050714	positive regulation of protein secretion	24/1127	129/18862	5.91604e-07	1.48974e-05	1.07546e-05	5478/2243/375/2266/2244/3479/5950/283/55450/6659/4035/25874/2182/8431/1956/9971/8754/7430/3123/5319/2150/27063/3783/222546	24
BP	GO:1903317	regulation of protein maturation	16/1127	63/18862	6.04343e-07	1.51478e-05	1.09353e-05	3249/1361/831/3818/4627/6659/7057/2023/10440/26022/5621/4102/2934/2161/4323/9528	16
BP	GO:1902600	proton transmembrane transport	27/1127	157/18862	6.17749e-07	1.54124e-05	1.11264e-05	7114/9296/537/506/4538/518/4508/516/9550/4519/4513/8992/4514/9551/522/4512/11261/4540/1346/56901/476/498/84419/23530/533/529/1327	27
BP	GO:0007015	actin filament organization	53/1127	435/18862	6.3078e-07	1.56653e-05	1.1309e-05	9168/7170/1072/389/375/226/7114/998/71/832/9948/387/10109/283/11034/5216/3925/3936/7168/6624/5358/10083/6281/29766/2316/1809/822/3397/22836/4082/4070/10458/5880/9353/391/10095/7791/79983/7430/5319/2150/7169/2934/7018/6711/65108/7171/390/6422/3383/274/5074/50853	53
BP	GO:0030100	regulation of endocytosis	32/1127	206/18862	6.34025e-07	1.5674e-05	1.13152e-05	967/567/718/375/998/801/977/341/348/1191/3190/929/808/4035/3673/84058/345/302/3685/3958/1175/7448/9784/558/64284/2719/2150/7018/857/100506013/274/22943	32
BP	GO:0051222	positive regulation of protein transport	42/1127	312/18862	6.87001e-07	1.69065e-05	1.2205e-05	5478/7534/2243/375/2266/998/2244/3479/10399/5950/283/10134/54741/5901/55450/2040/11261/6659/4035/25874/59286/2810/2316/3728/2182/8431/2181/10971/1956/7529/9971/8754/5880/5621/7430/3123/5319/22885/2150/27063/3783/222546	42
BP	GO:0006164	purine nucleotide biosynthetic process	31/1127	197/18862	7.09476e-07	1.73806e-05	1.25472e-05	226/7114/506/518/5162/4508/516/38/4513/9551/347734/2180/522/2023/25874/9060/2987/204/2182/2181/4833/1836/9061/5166/283120/60481/2984/53354/498/6576/5315	31
BP	GO:0045454	cell redox homeostasis	13/1127	43/18862	7.84811e-07	1.90771e-05	1.37719e-05	5052/7295/1728/9588/1535/7001/5880/2876/51714/7296/10935/23530/4780	13
BP	GO:0072522	purine-containing compound biosynthetic process	32/1127	208/18862	7.89615e-07	1.90771e-05	1.37719e-05	226/7114/506/518/5162/4508/516/38/4513/9551/347734/2180/522/2023/25874/9060/2987/204/2182/2181/4907/4833/1836/9061/5166/283120/60481/2984/53354/498/6576/5315	32
BP	GO:0006575	cellular modified amino acid metabolic process	31/1127	198/18862	7.9399e-07	1.90771e-05	1.37719e-05	3249/6647/3417/445/10550/55350/1428/5352/5320/2806/11145/9027/34/1152/6822/2950/8876/9022/8875/2938/27232/23743/2876/5319/2948/2939/10400/2348/2625/4780/2941	31
BP	GO:0071450	cellular response to oxygen radical	10/1127	25/18862	7.97703e-07	1.90771e-05	1.37719e-05	6647/5052/6648/1728/7001/283120/6649/4780/337/10516	10
BP	GO:0071451	cellular response to superoxide	10/1127	25/18862	7.97703e-07	1.90771e-05	1.37719e-05	6647/5052/6648/1728/7001/283120/6649/4780/337/10516	10
BP	GO:0034614	cellular response to reactive oxygen species	27/1127	159/18862	7.99871e-07	1.90771e-05	1.37719e-05	6647/10399/5052/6188/664/6648/7295/1728/7168/8644/5595/7001/301/140823/1956/2168/558/3725/283120/2353/6649/10935/4780/337/51765/5074/10516	27
BP	GO:0019318	hexose metabolic process	36/1127	250/18862	8.53555e-07	2.02682e-05	1.46318e-05	2597/7167/226/2805/5499/3479/5950/229/5162/4190/216/5236/2720/2027/5223/3146/4191/3487/2806/5230/2023/51181/5167/2538/5105/5166/3953/27232/2203/5214/3481/6576/231/2026/5315/10993	36
BP	GO:0048608	reproductive structure development	50/1127	405/18862	8.83511e-07	2.08294e-05	1.50369e-05	682/718/3020/3021/4257/6194/6647/3417/5176/5950/283/5660/677/8644/595/5595/2316/10272/3880/301/6926/6768/2069/3491/2707/2627/22836/3726/9353/558/3856/5764/6781/10409/10653/6599/3481/6382/2625/4678/10935/5654/6422/3383/3280/157506/100506013/55224/4323/8728	50
BP	GO:1905952	regulation of lipid localization	30/1127	189/18862	8.84883e-07	2.08294e-05	1.50369e-05	718/1401/341/348/10550/55004/1582/123/2180/5244/7057/5444/336/4035/1906/9536/949/345/1579/302/3685/19/183/185/8529/3688/5045/337/857/57104	30
BP	GO:0044242	cellular lipid catabolic process	34/1127	230/18862	9.29363e-07	2.17817e-05	1.57244e-05	2108/11343/3417/341/1892/1373/38/54363/10449/9588/37/336/4035/34/8644/949/345/224/8310/2168/57016/5105/13/3032/2169/57733/200879/10455/3074/337/57104/5264/27329/2173	34
BP	GO:0033273	response to vitamin	19/1127	89/18862	1.00483e-06	2.34489e-05	1.6928e-05	847/6648/4519/5009/595/3673/2950/6678/1956/1938/5764/6781/2934/10400/2348/1543/23530/6422/57817	19
BP	GO:0009063	cellular amino acid catabolic process	21/1127	106/18862	1.01712e-06	2.36338e-05	1.70615e-05	3242/2805/10247/3081/144193/5009/1428/2184/2806/11112/189/1036/80150/6898/3176/5092/27165/130013/2752/23576/10993	21
BP	GO:0030449	regulation of complement activation	22/1127	115/18862	1.05737e-06	2.44641e-05	1.76609e-05	3075/716/3078/725/722/718/735/1361/733/729/715/1191/710/731/732/3426/708/727/966/7448/1369/2	22
BP	GO:0019674	NAD metabolic process	14/1127	51/18862	1.09659e-06	2.52326e-05	1.82156e-05	3939/2597/7167/226/229/1728/2027/5223/5230/2023/4907/5214/2026/5315	14
BP	GO:0061458	reproductive system development	50/1127	408/18862	1.0999e-06	2.52326e-05	1.82156e-05	682/718/3020/3021/4257/6194/6647/3417/5176/5950/283/5660/677/8644/595/5595/2316/10272/3880/301/6926/6768/2069/3491/2707/2627/22836/3726/9353/558/3856/5764/6781/10409/10653/6599/3481/6382/2625/4678/10935/5654/6422/3383/3280/157506/100506013/55224/4323/8728	50
BP	GO:0022600	digestive system process	20/1127	99/18862	1.32571e-06	3.02521e-05	2.18393e-05	5950/1582/1645/11171/887/1314/949/55765/7031/2168/7430/9245/2169/48/29881/56667/3783/337/12/57817	20
BP	GO:0007006	mitochondrial membrane organization	25/1127	144/18862	1.33117e-06	3.02521e-05	2.18393e-05	7534/801/506/7417/27069/664/518/4508/516/10449/808/9551/522/2810/3313/3308/140823/10971/7529/117145/598/3320/498/90427/665	25
BP	GO:0006520	cellular amino acid metabolic process	43/1127	331/18862	1.33548e-06	3.02521e-05	2.18393e-05	3242/2805/10247/3081/445/144193/1373/38/1728/5009/5693/1428/5352/92292/2184/570/2806/11112/5690/9056/9971/189/5464/1036/27232/23743/80150/6898/3176/1503/5092/10400/143941/55258/64116/27165/130013/2752/10003/23576/4953/10993/1644	43
BP	GO:1901654	response to ketone	30/1127	193/18862	1.38894e-06	3.13322e-05	2.2619e-05	801/445/5176/1373/1728/2720/808/5244/7057/1646/1906/8644/595/2782/1956/5105/9353/1244/768/5764/1026/2353/4678/9076/6422/231/3383/857/3283/1364	30
BP	GO:0009064	glutamine family amino acid metabolic process	17/1127	75/18862	1.53229e-06	3.44224e-05	2.48499e-05	2805/445/144193/1373/5009/92292/2184/2806/9056/9971/80150/6898/1503/64116/27165/2752/23576	17
BP	GO:1903076	regulation of protein localization to plasma membrane	20/1127	100/18862	1.56527e-06	3.50181e-05	2.52799e-05	60/1173/10399/3675/4035/8878/3958/2181/1956/598/391/7430/8673/3688/10551/6711/4323/64114/8766/9528	20
BP	GO:0031581	hemidesmosome assembly	7/1127	12/18862	1.62088e-06	3.61128e-05	2.60702e-05	977/667/3852/1308/3909/3918/3914	7
BP	GO:0034368	protein-lipid complex remodeling	11/1127	33/18862	1.88591e-06	4.15054e-05	2.99631e-05	341/348/213/5320/336/949/345/183/185/9971/337	11
BP	GO:0034369	plasma lipoprotein particle remodeling	11/1127	33/18862	1.88591e-06	4.15054e-05	2.99631e-05	341/348/213/5320/336/949/345/183/185/9971/337	11
BP	GO:0042573	retinoic acid metabolic process	11/1127	33/18862	1.88591e-06	4.15054e-05	2.99631e-05	8644/1562/124/1382/1558/1577/125/1551/1543/157506/59342	11
BP	GO:0007178	transmembrane receptor protein serine/threonine kinase signaling pathway	45/1127	358/18862	1.89497e-06	4.15359e-05	2.99852e-05	2805/387/1655/6233/2280/116844/11171/3675/3694/7057/6997/2200/5595/56937/858/10272/135228/3397/4093/2331/3491/9315/1958/8754/148738/283375/10923/3725/7791/4681/2201/2719/2353/7018/3248/2348/51232/7316/5654/5045/6422/857/3280/22943/11167	45
BP	GO:0001889	liver development	24/1127	138/18862	2.08708e-06	4.55624e-05	3.2892e-05	3249/1361/445/2267/1373/5009/4192/51599/570/595/3673/55959/301/1956/2627/5105/3875/5764/9076/1543/3280/55679/5315/57817	24
BP	GO:0070613	regulation of protein processing	15/1127	61/18862	2.10781e-06	4.58301e-05	3.30852e-05	3249/1361/831/3818/4627/7057/2023/10440/26022/5621/4102/2934/2161/4323/9528	15
BP	GO:0071634	regulation of transforming growth factor beta production	12/1127	40/18862	2.28789e-06	4.95466e-05	3.57682e-05	2335/2280/100133941/3694/7057/3685/8710/2627/55353/25987/5045/4060	12
BP	GO:0061687	detoxification of inorganic compound	8/1127	17/18862	2.37159e-06	5.11544e-05	3.69289e-05	4502/4501/4499/4495/4493/4494/4496/1244	8
BP	GO:1904951	positive regulation of establishment of protein localization	42/1127	328/18862	2.57301e-06	5.52789e-05	3.99064e-05	5478/7534/2243/375/2266/998/2244/3479/10399/5950/283/10134/54741/5901/55450/2040/11261/6659/4035/25874/59286/2810/2316/3728/2182/8431/2181/10971/1956/7529/9971/8754/5880/5621/7430/3123/5319/22885/2150/27063/3783/222546	42
BP	GO:0061008	hepaticobiliary system development	24/1127	140/18862	2.71472e-06	5.7887e-05	4.17892e-05	3249/1361/445/2267/1373/5009/4192/51599/570/595/3673/55959/301/1956/2627/5105/3875/5764/9076/1543/3280/55679/5315/57817	24
BP	GO:0000303	response to superoxide	10/1127	28/18862	2.71579e-06	5.7887e-05	4.17892e-05	6647/5052/6648/1728/7001/283120/6649/4780/337/10516	10
BP	GO:0006879	cellular iron ion homeostasis	16/1127	70/18862	2.75391e-06	5.84693e-05	4.22096e-05	2512/1356/6647/537/9550/3263/2495/30061/148738/7037/3934/48/7018/9843/64116/57817	16
BP	GO:0032956	regulation of actin cytoskeleton organization	44/1127	352/18862	2.85131e-06	6.03007e-05	4.35317e-05	9168/389/375/7114/998/71/832/9948/387/10109/11034/5216/3273/3925/4192/7168/6624/4035/1906/684/6281/29766/2316/822/8826/5154/3397/22836/4070/10458/440335/5880/5066/9353/391/10095/2150/2934/6711/390/6422/3383/274/50853	44
BP	GO:0006090	pyruvate metabolic process	25/1127	150/18862	2.87508e-06	6.05092e-05	4.36822e-05	682/3939/2597/7167/226/3479/229/5162/5236/2027/5223/7416/5230/2023/25874/3945/351/189/5105/5166/2203/5214/2026/5315/10993	25
BP	GO:0071453	cellular response to oxygen levels	33/1127	231/18862	2.88352e-06	6.05092e-05	4.36822e-05	537/6233/664/9550/10449/5034/5693/51142/677/5230/7009/2023/1906/378938/6923/2782/4000/5690/2168/2627/1958/5105/768/5764/6781/27063/7316/6422/4780/3383/857/23576/665	33
BP	GO:1900026	positive regulation of substrate adhesion-dependent cell spreading	12/1127	41/18862	3.05963e-06	6.39569e-05	4.61712e-05	2243/2266/998/2244/10109/5034/4192/708/6281/2316/3037/55679	12
BP	GO:0006692	prostanoid metabolic process	13/1127	48/18862	3.12992e-06	6.49249e-05	4.687e-05	1645/1646/1906/8644/9536/1109/22949/2950/301/873/2938/3248/8824	13
BP	GO:0006693	prostaglandin metabolic process	13/1127	48/18862	3.12992e-06	6.49249e-05	4.687e-05	1645/1646/1906/8644/9536/1109/22949/2950/301/873/2938/3248/8824	13
BP	GO:0002793	positive regulation of peptide secretion	25/1127	151/18862	3.25336e-06	6.71238e-05	4.84573e-05	5478/2243/375/2266/2244/3479/5950/283/55450/6659/4035/25874/2182/8431/1956/9971/8754/7430/3123/5319/2150/27063/51714/3783/222546	25
BP	GO:0006081	cellular aldehyde metabolic process	15/1127	63/18862	3.26072e-06	6.71238e-05	4.84573e-05	7167/3417/229/216/1645/3418/2806/8644/224/22977/189/195814/157506/7086/6888	15
BP	GO:0071635	negative regulation of transforming growth factor beta production	7/1127	13/18862	3.33013e-06	6.82929e-05	4.93013e-05	2335/2280/100133941/2627/55353/25987/5045	7
BP	GO:0019730	antimicrobial humoral response	24/1127	142/18862	3.51055e-06	7.17212e-05	5.17763e-05	5919/2597/2243/2244/1191/283/3273/116842/6170/3151/5320/140823/10406/2627/3853/3934/5319/114770/5225/7018/5196/1672/132299/78989	24
BP	GO:0034367	protein-containing complex remodeling	11/1127	35/18862	3.63999e-06	7.38087e-05	5.32832e-05	341/348/213/5320/336/949/345/183/185/9971/337	11
BP	GO:0065005	protein-lipid complex assembly	11/1127	35/18862	3.63999e-06	7.38087e-05	5.32832e-05	375/341/348/5034/336/649/345/19/2181/337/274	11
BP	GO:0019320	hexose catabolic process	14/1127	56/18862	3.71914e-06	7.48529e-05	5.40371e-05	2597/7167/226/229/216/5236/2720/2027/5223/5230/2023/5214/2026/5315	14
BP	GO:0019748	secondary metabolic process	14/1127	56/18862	3.71914e-06	7.48529e-05	5.40371e-05	1645/1646/8644/1109/22977/5446/57016/5066/1244/1543/4780/231/130013/1644	14
BP	GO:0055088	lipid homeostasis	26/1127	162/18862	3.77483e-06	7.56922e-05	5.4643e-05	2805/57142/348/55004/100133941/433/7555/1645/5244/3694/336/949/345/2264/19/2538/53345/8310/9971/57678/25987/7851/337/857/57104/27329	26
BP	GO:1901653	cellular response to peptide	47/1127	391/18862	3.91449e-06	7.79067e-05	5.62416e-05	5919/2805/9296/537/10890/3479/445/9550/1373/9349/54741/8992/79746/197/64710/677/4035/1906/2200/2950/5167/858/7071/2538/3397/185/6464/9971/351/55023/10458/5105/5166/5621/688/5319/6599/3481/4780/231/3383/3484/857/5315/5573/533/529	47
BP	GO:0000305	response to oxygen radical	10/1127	29/18862	3.92373e-06	7.79067e-05	5.62416e-05	6647/5052/6648/1728/7001/283120/6649/4780/337/10516	10
BP	GO:0045807	positive regulation of endocytosis	19/1127	97/18862	3.92843e-06	7.79067e-05	5.62416e-05	967/567/718/375/998/977/348/1191/3190/929/4035/3673/302/7448/558/2719/2150/7018/100506013	19
BP	GO:0034433	steroid esterification	8/1127	18/18862	4.04501e-06	7.91941e-05	5.7171e-05	341/348/55004/38/336/183/185/337	8
BP	GO:0034434	sterol esterification	8/1127	18/18862	4.04501e-06	7.91941e-05	5.7171e-05	341/348/55004/38/336/183/185/337	8
BP	GO:0034435	cholesterol esterification	8/1127	18/18862	4.04501e-06	7.91941e-05	5.7171e-05	341/348/55004/38/336/183/185/337	8
BP	GO:0071604	transforming growth factor beta production	12/1127	42/18862	4.05186e-06	7.91941e-05	5.7171e-05	2335/2280/100133941/3694/7057/3685/8710/2627/55353/25987/5045/4060	12
BP	GO:0006007	glucose catabolic process	11/1127	36/18862	4.95981e-06	9.65913e-05	6.97302e-05	2597/7167/226/229/2027/5223/5230/2023/5214/2026/5315	11
BP	GO:0051592	response to calcium ion	24/1127	145/18862	5.10818e-06	9.91244e-05	7.15589e-05	2243/2266/2244/801/805/4519/311/808/7057/1906/8644/595/9536/3727/8826/6678/1956/22872/8754/140576/3726/2353/6382/857	24
BP	GO:0071241	cellular response to inorganic substance	31/1127	216/18862	5.18414e-06	0.000100239	7.23635e-05	567/4502/6647/5176/4501/664/4499/4495/4493/7341/1728/4494/4496/1906/8644/5595/3727/10272/8826/1956/351/3726/5621/3725/2203/2353/2934/7018/9076/1543/4780	31
BP	GO:0048771	tissue remodeling	27/1127	175/18862	5.3195e-06	0.00010249	7.39887e-05	537/3273/823/4192/2316/7052/183/6694/1471/1956/5166/7037/5880/10512/3953/558/5764/5340/7018/6422/857/7076/79705/4323/64114/1999/57817	27
BP	GO:0071456	cellular response to hypoxia	30/1127	206/18862	5.43476e-06	0.00010434	7.53238e-05	6233/664/10449/5034/5693/51142/677/5230/7009/2023/1906/378938/6923/2782/4000/5690/2168/2627/1958/5105/768/5764/6781/27063/7316/6422/4780/3383/23576/665	30
BP	GO:0000041	transition metal ion transport	22/1127	127/18862	5.86531e-06	0.000111813	8.07187e-05	2512/567/1356/9296/537/9550/3273/3263/8992/2495/10424/30061/7037/283375/1244/3934/7018/9843/64116/533/529/57817	22
BP	GO:1905477	positive regulation of protein localization to membrane	22/1127	127/18862	5.86531e-06	0.000111813	8.07187e-05	7534/10399/3675/2040/11261/4035/8878/2810/3958/6526/2181/10971/1956/7529/5621/391/5764/7430/3688/10551/6711/8766	22
BP	GO:0032368	regulation of lipid transport	25/1127	156/18862	5.92178e-06	0.000112493	8.12099e-05	341/348/10550/55004/1582/2180/5244/7057/5444/336/4035/1906/9536/345/1579/302/3685/19/183/185/8529/3688/5045/337/857	25
BP	GO:0007044	cell-substrate junction assembly	19/1127	100/18862	6.27783e-06	0.000118588	8.56101e-05	71/977/387/667/2335/3273/7057/4035/6281/3673/3852/1308/8826/3909/3918/3914/6422/7094/4323	19
BP	GO:1990542	mitochondrial transmembrane transport	20/1127	109/18862	6.28645e-06	0.000118588	8.56101e-05	506/518/4508/516/9551/522/29103/7416/51660/25874/9804/57380/7069/10440/140823/498/9131/3329/6576/64116	20
BP	GO:0010872	regulation of cholesterol esterification	7/1127	14/18862	6.31584e-06	0.000118729	8.57117e-05	341/348/55004/336/183/185/337	7
BP	GO:0007586	digestion	23/1127	138/18862	7.09009e-06	0.000132823	9.5886e-05	5950/1582/1645/11171/887/1314/1646/949/55765/7031/2168/7430/9245/2169/5225/48/29881/2984/56667/3783/337/12/57817	23
BP	GO:0030647	aminoglycoside antibiotic metabolic process	6/1127	10/18862	7.65747e-06	0.000142957	0.000103202	1645/1646/8644/1109/57016/231	6
BP	GO:0034377	plasma lipoprotein particle assembly	10/1127	31/18862	7.7855e-06	0.000144352	0.000104209	375/341/348/5034/336/649/345/19/2181/337	10
BP	GO:0042744	hydrogen peroxide catabolic process	10/1127	31/18862	7.7855e-06	0.000144352	0.000104209	3240/5052/847/9588/7001/2878/2876/10935/23530/337	10
BP	GO:0050727	regulation of inflammatory response	44/1127	366/18862	7.87964e-06	0.000145598	0.000105109	718/11343/7114/6288/6647/325/3479/348/5176/3929/118788/3818/197/4192/5320/3673/9536/2950/7052/301/183/1956/283131/4907/185/2896/9971/351/7791/8673/2876/1075/59272/3572/3123/114770/1773/8482/2625/11221/2161/9111/64332/57817	44
BP	GO:0009165	nucleotide biosynthetic process	35/1127	264/18862	8.04179e-06	0.000148089	0.000106907	226/7114/506/4837/518/5162/4508/516/38/4513/9551/347734/2180/522/3418/2023/25874/9060/2987/204/2182/2181/4833/1836/9061/5166/283120/60481/1503/2984/53354/498/6576/130013/5315	35
BP	GO:0001906	cell killing	27/1127	179/18862	8.17919e-06	0.000150109	0.000108365	3075/567/2597/3078/718/735/3273/563/3151/3916/966/1512/140823/5272/3853/598/3106/1075/3123/1773/2150/5196/3140/203068/3383/8542/57817	27
BP	GO:0009743	response to carbohydrate	31/1127	221/18862	8.33592e-06	0.000152468	0.000110069	3939/2805/1361/10399/5176/847/6648/79727/1728/55450/6659/677/7057/336/4035/25874/3673/3956/2950/2538/8431/6678/9971/1958/5105/3875/57678/3123/51714/3383/222546	31
BP	GO:0071398	cellular response to fatty acid	11/1127	38/18862	8.89506e-06	0.000162066	0.000116997	445/1373/1645/7520/1646/1906/8644/1109/9971/5166/9076	11
BP	GO:0017144	drug metabolic process	12/1127	45/18862	8.92053e-06	0.000162066	0.000116997	1571/316/1562/873/124/1558/1244/1577/8529/1555/1543/1559	12
BP	GO:2001242	regulation of intrinsic apoptotic signaling pathway	25/1127	160/18862	9.35526e-06	0.000169396	0.000122289	5478/6647/10399/6188/7417/1191/3190/6648/10134/6135/6201/5034/7009/2023/8876/6154/598/6421/4102/2876/7178/3315/4780/90427/857	25
BP	GO:1901616	organic hydroxy compound catabolic process	16/1127	77/18862	1.02262e-05	0.00018455	0.000133228	8630/7167/348/54363/2184/8644/949/1579/6822/57016/9784/8529/26002/4128/57834/197257	16
BP	GO:1901293	nucleoside phosphate biosynthetic process	35/1127	267/18862	1.03254e-05	0.00018572	0.000134073	226/7114/506/4837/518/5162/4508/516/38/4513/9551/347734/2180/522/3418/2023/25874/9060/2987/204/2182/2181/4833/1836/9061/5166/283120/60481/1503/2984/53354/498/6576/130013/5315	35
BP	GO:0019373	epoxygenase P450 pathway	8/1127	20/18862	1.04568e-05	0.00018746	0.000135329	1571/1579/1562/1558/8529/1555/1543/1559	8
BP	GO:0070542	response to fatty acid	14/1127	61/18862	1.08992e-05	0.000194746	0.000140589	445/847/1373/1645/2180/7520/1646/5444/1906/8644/1109/9971/5166/9076	14
BP	GO:0055072	iron ion homeostasis	17/1127	86/18862	1.10278e-05	0.000196397	0.000141781	2512/567/1356/6647/537/9550/3263/2495/30061/148738/7037/3934/48/7018/9843/64116/57817	17
BP	GO:0010273	detoxification of copper ion	7/1127	15/18862	1.12304e-05	0.000198697	0.000143441	4502/4501/4499/4495/4493/4494/4496	7
BP	GO:1990169	stress response to copper ion	7/1127	15/18862	1.12304e-05	0.000198697	0.000143441	4502/4501/4499/4495/4493/4494/4496	7
BP	GO:0046890	regulation of lipid biosynthetic process	29/1127	203/18862	1.13103e-05	0.000199458	0.000143991	718/6647/3417/341/10399/348/824/5901/11261/37/7108/8644/949/345/2264/7069/301/5154/3491/2181/9971/1958/5105/5166/476/57678/60481/337/157506	29
BP	GO:1903319	positive regulation of protein maturation	9/1127	26/18862	1.16309e-05	0.000204447	0.000147592	3249/3818/4627/6659/2023/10440/2934/2161/4323	9
BP	GO:0050892	intestinal absorption	11/1127	39/18862	1.17244e-05	0.000204885	0.000147909	1582/1645/949/2168/7430/9245/2169/48/29881/337/57817	11
BP	GO:0036294	cellular response to decreased oxygen levels	30/1127	214/18862	1.17315e-05	0.000204885	0.000147909	6233/664/10449/5034/5693/51142/677/5230/7009/2023/1906/378938/6923/2782/4000/5690/2168/2627/1958/5105/768/5764/6781/27063/7316/6422/4780/3383/23576/665	30
BP	GO:0044272	sulfur compound biosynthetic process	28/1127	193/18862	1.18838e-05	0.000206877	0.000149347	4257/5162/38/347734/2180/79586/25874/9060/2950/2182/2331/7358/1462/2181/1836/9061/2938/5166/1036/23743/4144/60481/2948/2939/6576/4780/4060/2941	28
BP	GO:0043648	dicarboxylic acid metabolic process	18/1127	96/18862	1.32366e-05	0.000229689	0.000165815	2805/3417/445/144193/4190/6390/3418/6389/4191/2806/9971/5105/6898/2348/27165/130013/2752/5264	18
BP	GO:0046365	monosaccharide catabolic process	14/1127	62/18862	1.33115e-05	0.000230251	0.00016622	2597/7167/226/229/216/5236/2720/2027/5223/5230/2023/5214/2026/5315	14
BP	GO:0001894	tissue homeostasis	34/1127	260/18862	1.44753e-05	0.000249584	0.000180177	567/60/71/2778/5284/6647/537/5052/5950/563/213/11171/8842/3694/51599/10083/55765/7031/1512/1956/5166/7037/5880/10518/3688/7018/3315/56667/9076/64116/231/79705/12/57817	34
BP	GO:0150115	cell-substrate junction organization	19/1127	106/18862	1.50827e-05	0.000259231	0.000187141	71/977/387/667/2335/3273/7057/4035/6281/3673/3852/1308/8826/3909/3918/3914/6422/7094/4323	19
BP	GO:0060191	regulation of lipase activity	18/1127	97/18862	1.53574e-05	0.000263118	0.000189947	389/350/341/387/283/336/4035/345/301/3491/1956/185/5319/5045/337/6272/2321/27329	18
BP	GO:0010634	positive regulation of epithelial cell migration	26/1127	175/18862	1.57239e-05	0.000267701	0.000193256	7114/506/57142/5216/3675/3146/7057/6997/1906/152007/3673/949/3037/301/183/1512/8828/6678/2896/8754/2625/498/3315/4780/8766/5606	26
BP	GO:0051897	positive regulation of protein kinase B signaling	26/1127	175/18862	1.57239e-05	0.000267701	0.000193256	57142/118788/79727/7295/708/7057/1646/8644/2264/5154/2066/2069/255324/1956/5880/558/391/283120/23533/3320/2876/3688/3481/2625/374/2159	26
BP	GO:0006558	L-phenylalanine metabolic process	6/1127	11/18862	1.59917e-05	0.00026888	0.000194107	3242/3081/2184/80150/6898/5092	6
BP	GO:0006559	L-phenylalanine catabolic process	6/1127	11/18862	1.59917e-05	0.00026888	0.000194107	3242/3081/2184/80150/6898/5092	6
BP	GO:1902221	erythrose 4-phosphate/phosphoenolpyruvate family amino acid metabolic process	6/1127	11/18862	1.59917e-05	0.00026888	0.000194107	3242/3081/2184/80150/6898/5092	6
BP	GO:1902222	erythrose 4-phosphate/phosphoenolpyruvate family amino acid catabolic process	6/1127	11/18862	1.59917e-05	0.00026888	0.000194107	3242/3081/2184/80150/6898/5092	6
BP	GO:0001890	placenta development	22/1127	135/18862	1.60781e-05	0.000269496	0.000194552	682/6194/6647/283/677/5595/3880/6768/3491/2707/3726/3856/5764/6781/10653/3481/10935/5654/3280/100506013/55224/8728	22
BP	GO:0001503	ossification	46/1127	401/18862	1.68077e-05	0.000280855	0.000202752	3020/3021/2778/537/506/6209/3479/387/1655/847/433/197/4192/9260/6169/3336/5595/649/255743/5167/27316/7071/3727/10272/6238/3491/6678/1462/1956/1836/3183/3726/5764/6781/2201/1291/3572/2719/3481/8482/51232/7171/6422/6272/4323/22943	46
BP	GO:0071560	cellular response to transforming growth factor beta stimulus	33/1127	251/18862	1.72082e-05	0.000286662	0.000206944	2805/387/6233/1284/116844/11171/3675/3694/677/7057/1906/2200/56937/858/135228/3397/4093/2331/9315/8754/3725/7791/2201/27063/2353/3248/2348/7316/5654/9076/5045/6422/857	33
BP	GO:0052372	modulation by symbiont of entry into host	12/1127	48/18862	1.82959e-05	0.000303847	0.00021935	10581/325/10410/5034/3956/3685/3853/3123/81603/2934/857/10346	12
BP	GO:0007160	cell-matrix adhesion	31/1127	230/18862	1.87294e-05	0.000310095	0.000223861	967/2243/2266/2244/71/387/2335/3273/3675/3694/7057/4035/6281/3673/3728/255743/3685/1308/1029/27076/8826/7448/8754/4680/7791/3688/10232/6422/4323/27329/10516	31
BP	GO:0042255	ribosome assembly	14/1127	64/18862	1.95872e-05	0.000322897	0.000233103	6125/6175/6209/6208/6122/6147/6135/6193/3921/7520/6134/708/6169/130916	14
BP	GO:0006754	ATP biosynthetic process	13/1127	56/18862	1.9622e-05	0.000322897	0.000233103	226/7114/506/518/4508/516/4513/9551/522/2023/283120/498/5315	13
BP	GO:0030168	platelet activation	24/1127	157/18862	2.03843e-05	0.000334426	0.000241425	5478/7534/60/2243/2266/2244/6288/71/2778/348/2335/3273/4627/5595/2782/2316/5154/558/23533/10398/5196/3315/2767/7094	24
BP	GO:0007043	cell-cell junction assembly	23/1127	147/18862	2.0553e-05	0.000336175	0.000242688	389/60/71/9948/387/1499/6624/51599/3728/1500/183/9074/2705/9971/1366/79983/59272/1004/91862/9076/857/7094/1364	23
BP	GO:0006956	complement activation	26/1127	178/18862	2.13227e-05	0.000347714	0.000251018	3075/716/3078/725/722/718/735/1361/1401/325/733/729/715/1191/710/10747/731/732/3426/708/727/966/7448/1369/78989/2	26
BP	GO:0006633	fatty acid biosynthetic process	25/1127	168/18862	2.21235e-05	0.00035765	0.000258191	11343/341/1571/4706/37/1906/8644/9536/345/2950/301/873/2181/5166/1558/60481/5319/2948/3248/200879/55258/1543/337/348158/1559	25
BP	GO:0009201	ribonucleoside triphosphate biosynthetic process	15/1127	73/18862	2.21302e-05	0.00035765	0.000258191	226/7114/506/518/4508/516/4513/9551/522/2023/4833/283120/1503/498/5315	15
BP	GO:0031100	animal organ regeneration	15/1127	73/18862	2.21302e-05	0.00035765	0.000258191	1361/4837/4519/3936/570/595/2950/55959/8431/1956/558/1026/9076/5315/57817	15
BP	GO:0071902	positive regulation of protein serine/threonine kinase activity	38/1127	311/18862	2.23527e-05	0.000360172	0.000260012	5478/6288/801/6647/3479/6188/387/6233/805/100133941/808/2180/7057/7852/6997/1906/727/595/5595/55765/7001/8826/183/5154/255324/1956/6464/23533/5515/5319/3481/7018/1647/7316/1848/2321/22943/5606	38
BP	GO:0030301	cholesterol transport	19/1127	109/18862	2.27331e-05	0.000365214	0.000263652	341/348/1191/55004/1582/1645/5244/5444/336/4035/949/345/302/19/25987/29881/5045/337/857	19
BP	GO:1902175	regulation of oxidative stress-induced intrinsic apoptotic signaling pathway	9/1127	28/18862	2.30649e-05	0.000369448	0.000266708	5478/6647/6648/5034/8876/6421/2876/3315/4780	9
BP	GO:0010043	response to zinc ion	13/1127	57/18862	2.40422e-05	0.000382836	0.000276373	4502/445/4501/6648/4499/4495/1373/4493/4494/4496/5009/5066/57817	13
BP	GO:1900024	regulation of substrate adhesion-dependent cell spreading	13/1127	57/18862	2.40422e-05	0.000382836	0.000276373	2243/2266/998/2244/10109/5034/4192/708/6281/2316/3037/4070/55679	13
BP	GO:0030099	myeloid cell differentiation	47/1127	419/18862	2.43366e-05	0.000386388	0.000278937	567/3020/998/3021/2778/6194/537/325/6208/9948/84293/4495/4627/84661/3694/4055/3146/677/7057/2200/29766/302/7071/10272/3313/135228/3958/8365/3276/351/7037/3726/3725/8294/3123/55170/2719/2150/2353/7018/10398/5196/2625/10935/6422/79705/8364	47
BP	GO:0015849	organic acid transport	39/1127	324/18862	2.46908e-05	0.00038969	0.000281321	348/10550/366/10599/1645/123/2180/5320/7057/51660/2806/25874/1906/9536/1109/1579/2182/7069/301/3993/8431/9056/2181/2168/1836/9971/1244/284111/59272/8529/3688/5319/6520/6554/2348/6576/23428/27165/54407	39
BP	GO:0043542	endothelial cell migration	35/1127	278/18862	2.47533e-05	0.00038969	0.000281321	7114/506/350/348/387/5176/3273/4627/3146/7057/6997/1948/1906/949/3728/301/183/3397/8828/6678/2896/9353/5764/6781/2876/6286/1803/1647/2625/498/3315/4780/2752/11167/5606	35
BP	GO:0090066	regulation of anatomical structure size	53/1127	493/18862	2.47605e-05	0.00038969	0.000281321	9168/2243/114908/375/7114/2266/2244/1173/5499/6647/1401/832/57142/9948/348/387/10109/2335/11034/3827/6648/5216/1373/1889/4035/10083/1906/29766/822/183/1956/1382/185/10458/10512/9353/10095/7430/2876/59272/7869/2150/2934/8482/6711/3783/3383/857/54825/274/59342/8766/50853	53
BP	GO:0034248	regulation of cellular amide metabolic process	53/1127	494/18862	2.61726e-05	0.00041072	0.000296503	2597/6125/10247/5499/6208/3479/57142/10399/6188/348/1191/5935/283/6191/79727/6726/7555/23521/4691/9939/6659/6134/708/5223/677/7057/1984/6169/3673/5595/26986/10642/3609/3491/6154/1153/1981/9971/351/5166/1938/5621/1653/48/51714/3315/65981/4780/5315/10644/23654/274/1968	53
BP	GO:0009612	response to mechanical stimulus	28/1127	202/18862	2.79545e-05	0.000436432	0.000315065	3249/2805/1499/664/4192/4055/7057/7852/1906/3673/5595/3728/3727/1956/8795/476/3725/5764/27063/2353/2934/1647/3485/8796/5493/84189/4323/54407	28
BP	GO:0071559	response to transforming growth factor beta	33/1127	257/18862	2.80157e-05	0.000436432	0.000315065	2805/387/6233/1284/116844/11171/3675/3694/677/7057/1906/2200/56937/858/135228/3397/4093/2331/9315/8754/3725/7791/2201/27063/2353/3248/2348/7316/5654/9076/5045/6422/857	33
BP	GO:0050680	negative regulation of epithelial cell proliferation	24/1127	160/18862	2.80529e-05	0.000436432	0.000315065	567/3249/1361/350/348/5176/11171/7057/2810/858/135228/2069/6678/5764/2719/2625/498/11221/91862/9500/6422/857/55679/2321	24
BP	GO:0032429	regulation of phospholipase A2 activity	6/1127	12/18862	3.03626e-05	0.000468328	0.00033809	283/4035/301/1956/185/5319	6
BP	GO:0042178	xenobiotic catabolic process	6/1127	12/18862	3.03626e-05	0.000468328	0.00033809	1429/2180/5446/1244/2948/1543	6
BP	GO:0071481	cellular response to X-ray	6/1127	12/18862	3.03626e-05	0.000468328	0.00033809	2547/64710/7520/2625/6422/57817	6
BP	GO:1904375	regulation of protein localization to cell periphery	20/1127	121/18862	3.11883e-05	0.000479697	0.000346298	60/1173/10399/3675/4035/8878/3958/2181/1956/598/391/7430/8673/3688/10551/6711/4323/64114/8766/9528	20
BP	GO:0036296	response to increased oxygen levels	9/1127	29/18862	3.16784e-05	0.000485855	0.000350744	537/664/847/4508/9550/4519/1026/1543/857	9
BP	GO:0008360	regulation of cell shape	23/1127	151/18862	3.1907e-05	0.000487978	0.000352276	389/3249/226/9948/387/2335/4627/7168/54751/301/22836/6284/55023/10458/2011/5880/391/5764/7430/390/3074/3383/23654	23
BP	GO:1900407	regulation of cellular response to oxidative stress	16/1127	84/18862	3.22094e-05	0.000491216	0.000354614	5478/6647/10399/6648/7295/5034/8876/6421/135112/283120/2876/3315/4780/51765/5074/10516	16
BP	GO:0002573	myeloid leukocyte differentiation	28/1127	204/18862	3.35083e-05	0.000509352	0.000367706	998/2778/537/325/84293/4495/4627/3694/4055/677/2200/302/7071/10272/135228/351/7037/3726/3725/3123/2719/2150/2353/7018/5196/2625/6422/79705	28
BP	GO:0009206	purine ribonucleoside triphosphate biosynthetic process	14/1127	67/18862	3.3869e-05	0.000509352	0.000367706	226/7114/506/518/4508/516/4513/9551/522/2023/4833/283120/498/5315	14
BP	GO:0033866	nucleoside bisphosphate biosynthetic process	14/1127	67/18862	3.3869e-05	0.000509352	0.000367706	5162/38/347734/2180/25874/9060/2182/2181/1836/9061/5166/60481/53354/6576	14
BP	GO:0034030	ribonucleoside bisphosphate biosynthetic process	14/1127	67/18862	3.3869e-05	0.000509352	0.000367706	5162/38/347734/2180/25874/9060/2182/2181/1836/9061/5166/60481/53354/6576	14
BP	GO:0034033	purine nucleoside bisphosphate biosynthetic process	14/1127	67/18862	3.3869e-05	0.000509352	0.000367706	5162/38/347734/2180/25874/9060/2182/2181/1836/9061/5166/60481/53354/6576	14
BP	GO:0030194	positive regulation of blood coagulation	8/1127	23/18862	3.46449e-05	0.000518142	0.000374052	1361/350/3273/7057/7001/5340/2161/4780	8
BP	GO:1900048	positive regulation of hemostasis	8/1127	23/18862	3.46449e-05	0.000518142	0.000374052	1361/350/3273/7057/7001/5340/2161/4780	8
BP	GO:0043277	apoptotic cell clearance	12/1127	51/18862	3.53058e-05	0.000526572	0.000380137	718/3146/7057/4035/949/7052/3685/301/5880/4240/558/391	12
BP	GO:0072655	establishment of protein localization to mitochondrion	22/1127	142/18862	3.60403e-05	0.00053605	0.00038698	7534/801/10134/54741/808/29103/9804/59286/2810/130916/3308/10440/140823/10971/7529/5880/3320/22885/9131/3329/90427/665	22
BP	GO:0042632	cholesterol homeostasis	17/1127	94/18862	3.71308e-05	0.000550757	0.000397597	348/55004/100133941/7555/1645/336/949/345/2264/19/2538/9971/25987/7851/337/857/27329	17
BP	GO:0034109	homotypic cell-cell adhesion	16/1127	85/18862	3.75072e-05	0.00055482	0.00040053	5478/60/2243/2266/2244/71/2778/2335/4627/2316/3728/3956/1832/10398/3315/7094	16
BP	GO:0007159	leukocyte cell-cell adhesion	42/1127	366/18862	3.82809e-05	0.000564722	0.000407678	998/3479/6188/387/445/2267/100133941/4192/6659/3146/7001/3956/8876/3037/301/3958/4907/5105/7037/5880/57678/5621/7430/3572/3123/3688/1803/3481/2625/3329/11221/27242/3485/64116/337/3383/857/3280/5573/64332/5074/4973	42
BP	GO:0002683	negative regulation of immune system process	45/1127	403/18862	4.02207e-05	0.000591725	0.000427173	28959/725/722/259/325/55365/2267/710/4192/708/3146/7057/336/7009/2200/684/727/7001/10272/966/3313/301/3958/5094/5272/2896/9353/558/57678/5621/3106/7430/4681/2876/3123/114770/1803/11221/27242/5654/9111/6422/5573/5074/2	45
BP	GO:0009145	purine nucleoside triphosphate biosynthetic process	14/1127	68/18862	4.03319e-05	0.000591754	0.000427193	226/7114/506/518/4508/516/4513/9551/522/2023/4833/283120/498/5315	14
BP	GO:0035987	endodermal cell differentiation	11/1127	44/18862	4.07287e-05	0.00059596	0.00043023	2335/1284/3685/3909/2627/7448/3914/1291/4323/22943/3912	11
BP	GO:0055092	sterol homeostasis	17/1127	95/18862	4.27428e-05	0.000623202	0.000449896	348/55004/100133941/7555/1645/336/949/345/2264/19/2538/9971/25987/7851/337/857/27329	17
BP	GO:0071384	cellular response to corticosteroid stimulus	13/1127	60/18862	4.29358e-05	0.000623202	0.000449896	445/5176/4537/677/1906/8644/2950/301/1956/5105/1244/6781/3383	13
BP	GO:1903078	positive regulation of protein localization to plasma membrane	13/1127	60/18862	4.29358e-05	0.000623202	0.000449896	10399/3675/4035/8878/3958/2181/1956/391/7430/3688/10551/6711/8766	13
BP	GO:0034284	response to monosaccharide	27/1127	196/18862	4.31028e-05	0.000623954	0.000450439	3939/1361/10399/5176/847/6648/79727/55450/6659/7057/336/4035/25874/3673/3956/2950/8431/6678/9971/1958/5105/3875/57678/3123/51714/3383/222546	27
BP	GO:2001236	regulation of extrinsic apoptotic signaling pathway	23/1127	154/18862	4.38296e-05	0.000632783	0.000456813	2243/2266/2244/5499/3479/4055/7057/7001/2950/3685/183/3958/55023/598/8795/2876/51330/5196/6422/3383/857/81618/64114	23
BP	GO:0071900	regulation of protein serine/threonine kinase activity	52/1127	492/18862	4.63442e-05	0.000667307	0.000481736	5478/60/6288/801/6647/3479/6188/348/387/6233/805/100133941/808/2180/7057/7852/6997/1906/727/595/5595/2810/55765/7001/2950/1029/8826/183/5154/255324/1956/6464/10983/901/23533/5570/1026/5515/5319/3481/7018/1647/7316/3315/11221/1848/6422/857/5573/2321/22943/5606	52
BP	GO:0072659	protein localization to plasma membrane	34/1127	275/18862	4.66581e-05	0.000670046	0.000483713	682/60/1173/10890/10399/10550/83871/3675/4035/6281/8878/2316/3728/481/3958/3911/2181/1956/598/483/3875/391/81693/7430/8673/3688/10551/6711/10267/55690/4323/64114/8766/9528	34
BP	GO:0006957	complement activation, alternative pathway	7/1127	18/18862	4.73816e-05	0.00067463	0.000487022	3075/718/735/733/731/732/727	7
BP	GO:0034375	high-density lipoprotein particle remodeling	7/1127	18/18862	4.73816e-05	0.00067463	0.000487022	341/348/213/336/949/345/337	7
BP	GO:0097501	stress response to metal ion	7/1127	18/18862	4.73816e-05	0.00067463	0.000487022	4502/4501/4499/4495/4493/4494/4496	7
BP	GO:0043406	positive regulation of MAP kinase activity	30/1127	230/18862	4.74758e-05	0.00067463	0.000487022	5478/6288/6647/3479/6188/6233/100133941/7057/7852/6997/1906/727/5595/55765/7001/8826/183/5154/255324/1956/6464/23533/5319/7018/1647/7316/1848/2321/22943/5606	30
BP	GO:0014823	response to activity	14/1127	69/18862	4.78493e-05	0.000678157	0.000489568	5919/847/6648/1284/7384/7852/2806/9804/1906/3673/183/5105/5764/29881	14
BP	GO:0002237	response to molecule of bacterial origin	40/1127	346/18862	4.91831e-05	0.000692631	0.000500017	567/4257/387/445/9516/3929/6648/929/1373/100133941/824/3146/1906/9536/5595/949/55765/7001/2950/3727/6678/9971/8754/5105/1244/558/3725/7035/27063/2353/3248/5196/11221/10935/57402/9076/1543/3383/3764/57817	40
BP	GO:0010954	positive regulation of protein processing	8/1127	24/18862	4.92543e-05	0.000692631	0.000500017	3249/3818/4627/2023/10440/2934/2161/4323	8
BP	GO:0050820	positive regulation of coagulation	8/1127	24/18862	4.92543e-05	0.000692631	0.000500017	1361/350/3273/7057/7001/5340/2161/4780	8
BP	GO:0009199	ribonucleoside triphosphate metabolic process	16/1127	87/18862	5.0457e-05	0.000707705	0.0005109	226/7114/506/518/4508/516/4513/5901/9551/522/2023/4833/283120/1503/498/5315	16
BP	GO:0033700	phospholipid efflux	6/1127	13/18862	5.35333e-05	0.000748912	0.000540647	341/348/336/345/19/337	6
BP	GO:0016049	cell growth	50/1127	470/18862	5.46021e-05	0.000761897	0.000550021	3249/3020/998/3021/3479/57142/10399/348/2335/1499/55004/3273/10591/7852/3487/4035/2023/1906/684/2810/5167/1029/8826/183/8828/1956/1382/185/1981/351/214/3913/10512/9353/2203/3320/1026/5515/5931/7869/8482/58191/65981/6422/3484/54825/4323/8766/55384/57817	50
BP	GO:0070585	protein localization to mitochondrion	22/1127	146/18862	5.55586e-05	0.00077325	0.000558217	7534/801/10134/54741/808/29103/9804/59286/2810/130916/3308/10440/140823/10971/7529/5880/3320/22885/9131/3329/90427/665	22
BP	GO:0032371	regulation of sterol transport	14/1127	70/18862	5.65632e-05	0.000781378	0.000564085	341/348/55004/1582/5244/5444/336/4035/345/302/19/5045/337/857	14
BP	GO:0032374	regulation of cholesterol transport	14/1127	70/18862	5.65632e-05	0.000781378	0.000564085	341/348/55004/1582/5244/5444/336/4035/345/302/19/5045/337/857	14
BP	GO:0019433	triglyceride catabolic process	10/1127	38/18862	5.65756e-05	0.000781378	0.000564085	11343/1373/345/2168/13/2169/200879/337/57104/2173	10
BP	GO:0032868	response to insulin	34/1127	278/18862	5.81367e-05	0.000800896	0.000578175	5919/2805/9296/537/10890/847/9550/8992/79746/197/5009/64710/677/2806/2950/5167/858/2538/6464/9971/1958/55023/10458/5105/5166/5319/6599/3481/3383/3484/5315/6272/533/529	34
BP	GO:0070527	platelet aggregation	13/1127	62/18862	6.17739e-05	0.000848842	0.000612787	5478/60/2243/2266/2244/71/2778/2335/4627/2316/10398/3315/7094	13
BP	GO:0035296	regulation of tube diameter	20/1127	127/18862	6.34521e-05	0.0008675	0.000626257	2243/2266/2244/6647/1401/348/3827/6648/1373/1889/1906/183/1956/185/2876/59272/2150/3383/857/59342	20
BP	GO:0097746	blood vessel diameter maintenance	20/1127	127/18862	6.34521e-05	0.0008675	0.000626257	2243/2266/2244/6647/1401/348/3827/6648/1373/1889/1906/183/1956/185/2876/59272/2150/3383/857/59342	20
BP	GO:0003018	vascular process in circulatory system	31/1127	245/18862	6.41295e-05	0.000874552	0.000631348	2243/2266/2244/6647/1401/348/6515/3827/6648/1373/1889/4035/1906/183/6526/1956/185/7037/3953/9353/1244/2876/59272/2150/23428/3383/857/23576/59342/3764/54407	31
BP	GO:0006694	steroid biosynthetic process	26/1127	190/18862	6.6405e-05	0.000903308	0.000652107	8630/6647/348/3158/3290/1582/10449/5901/570/1727/7108/8644/1109/949/2264/9971/1958/476/57678/29881/1551/1543/6307/337/231/3283	26
BP	GO:0042110	T cell activation	50/1127	474/18862	6.77331e-05	0.000919065	0.000663482	567/998/6194/6647/977/3479/6188/2267/2280/100133941/4627/3936/4192/6659/3146/677/7001/3956/8876/301/3958/1958/1514/5105/7037/5880/3953/26022/57678/5621/3572/3123/1503/1803/2150/2934/3481/1650/3140/2625/3329/11221/27242/3485/3383/857/3280/5573/64332/5074	50
BP	GO:0009205	purine ribonucleoside triphosphate metabolic process	15/1127	80/18862	6.81961e-05	0.000923034	0.000666347	226/7114/506/518/4508/516/4513/5901/9551/522/2023/4833/283120/498/5315	15
BP	GO:0051873	killing by host of symbiont cells	8/1127	25/18862	6.86542e-05	0.000926918	0.000669151	2597/3078/3273/140823/3853/2150/5196/8542	8
BP	GO:0001819	positive regulation of cytokine production	47/1127	437/18862	6.94442e-05	0.000935251	0.000675167	567/2597/718/5004/6288/6647/6188/1191/2547/3929/1499/929/5441/5005/4192/7520/3146/7057/336/4035/1535/727/3556/55765/9208/55959/301/183/2069/8710/2627/1958/351/283120/3320/3572/5319/2150/8482/5196/6711/2625/3329/3315/5434/5045/4060	47
BP	GO:0008637	apoptotic mitochondrial changes	19/1127	118/18862	7.05006e-05	0.000947122	0.000683737	7534/3479/7417/1191/27069/664/6648/10449/2810/2066/10971/7529/117145/598/3725/2876/3329/90427/665	19
BP	GO:0035150	regulation of tube size	20/1127	128/18862	7.1054e-05	0.000952194	0.000687399	2243/2266/2244/6647/1401/348/3827/6648/1373/1889/1906/183/1956/185/2876/59272/2150/3383/857/59342	20
BP	GO:2001234	negative regulation of apoptotic signaling pathway	29/1127	224/18862	7.22166e-05	0.000965384	0.00069692	5478/2243/2266/2244/3479/7417/1191/27069/6648/10449/7057/7009/2023/7001/2950/3685/8876/3958/55023/598/8795/4102/2876/7178/5196/3315/4780/3383/64114	29
BP	GO:0050821	protein stabilization	26/1127	191/18862	7.25922e-05	0.000968015	0.00069882	2597/6125/3479/57142/1191/5216/9349/173/7341/6135/6201/3920/11261/6659/336/3916/2316/481/1500/2896/483/3320/1026/57733/10103/3329	26
BP	GO:0007179	transforming growth factor beta receptor signaling pathway	27/1127	202/18862	7.31302e-05	0.000972793	0.000702269	2805/387/6233/116844/11171/3675/3694/7057/2200/56937/858/135228/3397/4093/2331/9315/8754/3725/7791/2201/2353/3248/2348/7316/5654/5045/857	27
BP	GO:0010165	response to X-ray	9/1127	32/18862	7.54138e-05	0.000998265	0.000720657	2547/64710/7520/595/301/1026/2625/6422/57817	9
BP	GO:0090322	regulation of superoxide metabolic process	9/1127	32/18862	7.54138e-05	0.000998265	0.000720657	6647/1401/2950/5446/1956/283120/2150/4780/10516	9
BP	GO:0071385	cellular response to glucocorticoid stimulus	12/1127	55/18862	7.81995e-05	0.00102793	0.000742075	445/5176/4537/677/1906/2950/301/1956/5105/1244/6781/3383	12
BP	GO:0031333	negative regulation of protein-containing complex assembly	21/1127	139/18862	7.82234e-05	0.00102793	0.000742075	9168/7114/998/832/7417/1191/5216/23521/3925/29103/3146/29766/56937/822/1366/9353/2934/6711/8543/22943/50853	21
BP	GO:0042273	ribosomal large subunit biogenesis	14/1127	72/18862	7.82246e-05	0.00102793	0.000742075	6125/6175/6129/4736/6122/11224/6147/6135/6165/6134/2971/6169/9045/6154	14
BP	GO:1903706	regulation of hemopoiesis	45/1127	415/18862	8.11722e-05	0.00106408	0.000768172	28959/567/3020/3021/2778/6647/537/325/55365/2547/84293/84661/4192/6659/3146/677/7057/2200/7001/7071/10272/8876/3313/301/3958/8365/3276/5105/558/3725/3106/8294/5764/3123/55170/114770/2353/10398/5196/2625/11221/6422/64332/4323/8364	45
BP	GO:0042063	gliogenesis	34/1127	283/18862	8.30577e-05	0.00108355	0.000782227	6647/57142/9948/1191/664/79727/4192/6659/3418/54587/7852/4035/5595/9921/2950/301/1956/2896/351/3913/3953/26022/1938/5764/3572/2934/57211/11221/27242/3074/3280/274/4323/3912	34
BP	GO:0097193	intrinsic apoptotic signaling pathway	34/1127	283/18862	8.30577e-05	0.00108355	0.000782227	5478/6647/10399/6188/7417/1191/1655/664/3190/10550/6648/10134/6135/100133941/6201/5034/7009/2023/2810/8876/6154/64065/598/8795/6421/4102/2876/1026/7178/9131/3315/4780/90427/857	34
BP	GO:0045834	positive regulation of lipid metabolic process	22/1127	150/18862	8.40227e-05	0.00109351	0.000789414	998/341/10399/348/824/11261/336/949/301/183/3491/2181/185/2168/9971/13/60481/337/157506/2321/57104/27329	22
BP	GO:0031647	regulation of protein stability	35/1127	295/18862	8.4778e-05	0.00109806	0.000792698	2597/6125/3479/57142/1191/5216/9349/173/7341/6135/433/6201/3920/11261/6659/336/3916/2316/481/1500/1512/2896/483/10169/5621/79589/3320/1026/57733/10103/2934/7018/1650/5476/3329	35
BP	GO:0051047	positive regulation of secretion	35/1127	295/18862	8.4778e-05	0.00109806	0.000792698	5478/2243/375/2266/2244/1361/537/3479/5950/283/55450/6659/4035/25874/1906/3916/9536/1579/2182/8431/2181/1956/9971/8754/7430/8673/8529/3123/5319/2150/27063/6382/51714/3783/222546	35
BP	GO:0043405	regulation of MAP kinase activity	36/1127	307/18862	8.6021e-05	0.0011115	0.000802401	5478/6288/6647/3479/6188/348/6233/100133941/7057/7852/6997/1906/727/5595/55765/7001/2950/8826/183/5154/255324/1956/6464/23533/5515/5319/7018/1647/7316/11221/1848/6422/857/2321/22943/5606	36
BP	GO:0060249	anatomical structure homeostasis	49/1127	466/18862	8.63458e-05	0.0011128	0.000803339	567/60/226/71/2778/5284/6647/537/5052/2547/5950/563/213/11171/3920/7520/8842/3181/3694/51599/10083/5595/55765/7031/1512/8365/1956/3183/5166/7037/5880/8294/10518/3178/5570/3320/3688/1639/7018/3315/56667/9076/64116/231/79705/12/8364/57817/793	49
BP	GO:0033865	nucleoside bisphosphate metabolic process	21/1127	140/18862	8.69436e-05	0.0011128	0.000803339	5162/3158/38/347734/2180/570/25874/9060/6822/5167/2182/2181/1836/9061/117145/5166/57678/60481/53354/6576/348158	21
BP	GO:0033875	ribonucleoside bisphosphate metabolic process	21/1127	140/18862	8.69436e-05	0.0011128	0.000803339	5162/3158/38/347734/2180/570/25874/9060/6822/5167/2182/2181/1836/9061/117145/5166/57678/60481/53354/6576/348158	21
BP	GO:0034032	purine nucleoside bisphosphate metabolic process	21/1127	140/18862	8.69436e-05	0.0011128	0.000803339	5162/3158/38/347734/2180/570/25874/9060/6822/5167/2182/2181/1836/9061/117145/5166/57678/60481/53354/6576/348158	21
BP	GO:0006122	mitochondrial electron transport, ubiquinol to cytochrome c	6/1127	14/18862	8.89463e-05	0.00113574	0.000819905	27089/7388/4519/7384/7386/7385	6
BP	GO:0042246	tissue regeneration	14/1127	73/18862	9.15352e-05	0.00116605	0.000841784	3479/2027/4192/301/2066/5764/2876/1026/688/7104/2934/11221/3484/5315	14
BP	GO:0070371	ERK1 and ERK2 cascade	37/1127	320/18862	9.26641e-05	0.00117766	0.000850165	7534/2243/2266/2244/537/3479/348/2335/55450/5320/3146/677/4035/152007/5595/2264/2950/255743/3685/5154/1512/2066/4835/3491/1956/6464/351/7430/3123/2150/7018/8482/11221/1848/3383/100506013/6364	37
BP	GO:0046461	neutral lipid catabolic process	11/1127	48/18862	9.63032e-05	0.00121819	0.000879424	11343/1373/336/345/2168/13/2169/200879/337/57104/2173	11
BP	GO:0046464	acylglycerol catabolic process	11/1127	48/18862	9.63032e-05	0.00121819	0.000879424	11343/1373/336/345/2168/13/2169/200879/337/57104/2173	11
BP	GO:0009074	aromatic amino acid family catabolic process	7/1127	20/18862	0.000103844	0.00130747	0.000943879	3242/3081/2184/80150/6898/5092/130013	7
BP	GO:0043691	reverse cholesterol transport	7/1127	20/18862	0.000103844	0.00130747	0.000943879	348/1191/336/949/345/19/337	7
BP	GO:0046503	glycerolipid catabolic process	14/1127	74/18862	0.00010677	0.00134119	0.000968222	11343/341/1373/9588/336/949/345/2168/13/2169/200879/337/57104/2173	14
BP	GO:0034250	positive regulation of cellular amide metabolic process	23/1127	163/18862	0.000107099	0.00134221	0.000968957	6125/10399/1191/5935/6191/79727/7555/6659/708/7057/1984/3673/5595/26986/3491/6154/1153/1981/1938/4780/5315/23654/1968	23
BP	GO:0097529	myeloid leukocyte migration	28/1127	218/18862	0.000109684	0.00137143	0.000990051	682/5478/5919/6288/9948/3929/4192/708/3146/7057/1906/727/5595/301/3958/5880/9353/391/4681/5319/1803/5196/57402/57509/2321/84675/4323/6364	28
BP	GO:0046486	glycerolipid metabolic process	46/1127	433/18862	0.000110578	0.00137942	0.00099582	718/11343/375/350/341/348/283/847/1373/1571/824/10809/9588/2180/5320/11145/5444/336/949/345/57153/2182/7069/2538/5154/2181/9514/2168/9971/5105/57678/23533/13/3032/2876/2169/5319/10400/200879/51604/337/857/55224/5920/57104/2173	46
BP	GO:0015918	sterol transport	19/1127	122/18862	0.000111682	0.00138999	0.00100345	341/348/1191/55004/1582/1645/5244/5444/336/4035/949/345/302/19/25987/29881/5045/337/857	19
BP	GO:0043393	regulation of protein binding	26/1127	196/18862	0.000111975	0.00139044	0.00100377	567/3078/60/998/5499/10399/348/2280/6135/5901/4035/7009/5595/302/3397/7448/351/2011/1026/5515/5092/143941/65981/10267/857/22943	26
BP	GO:0022409	positive regulation of cell-cell adhesion	33/1127	276/18862	0.000115151	0.00142661	0.00102988	2243/2266/998/2244/3479/6188/387/100133941/4192/6659/3146/3956/10272/8876/3037/301/5105/7037/57678/4680/3572/3123/1803/3481/2625/3329/11221/3485/3383/857/3280/64332/8728	33
BP	GO:0051591	response to cAMP	16/1127	93/18862	0.000115797	0.00142808	0.00103094	682/3939/445/366/1373/677/6678/351/189/5105/1036/3725/7430/6781/2353/6382	16
BP	GO:1902882	regulation of response to oxidative stress	16/1127	93/18862	0.000115797	0.00142808	0.00103094	5478/6647/10399/6648/7295/5034/8876/6421/135112/283120/2876/3315/4780/51765/5074/10516	16
BP	GO:0071622	regulation of granulocyte chemotaxis	11/1127	49/18862	0.000117545	0.00144633	0.00104412	5919/3929/4192/708/7057/1906/5595/5880/9353/1803/57402	11
BP	GO:0009142	nucleoside triphosphate biosynthetic process	15/1127	84/18862	0.000121672	0.00149226	0.00107728	226/7114/506/518/4508/516/4513/9551/522/2023/4833/283120/1503/498/5315	15
BP	GO:0016052	carbohydrate catabolic process	26/1127	197/18862	0.000121829	0.00149226	0.00107728	3939/2597/7167/226/801/5499/3479/229/216/5236/2720/2027/5226/5223/3146/5230/2023/2538/351/2203/5214/57733/3074/5836/2026/5315	26
BP	GO:0051017	actin filament bundle assembly	22/1127	154/18862	0.000124797	0.00152235	0.001099	389/998/71/387/5216/3925/3936/7168/6624/5358/10083/6281/2316/1809/3397/4082/4070/10458/7791/7430/6422/5074	22
BP	GO:0070268	cornification	18/1127	113/18862	0.000124847	0.00152235	0.001099	823/1825/3728/826/3852/3880/6768/3855/64065/3853/3875/3856/1830/5652/1832/5493/5045/192666	18
BP	GO:0042180	cellular ketone metabolic process	31/1127	254/18862	0.000125861	0.00153126	0.00110543	8630/7167/341/1728/1645/5693/37/1646/2806/8644/1109/345/2264/301/5690/9056/2168/9971/1958/57016/5166/60481/8529/1555/337/231/130013/857/57834/157506/4953	31
BP	GO:0006099	tricarboxylic acid cycle	9/1127	34/18862	0.000126567	0.00153359	0.00110711	3417/5162/4190/6390/3418/6389/4191/48/23530	9
BP	GO:0051883	killing of cells in other organism involved in symbiotic interaction	8/1127	27/18862	0.000126619	0.00153359	0.00110711	2597/3078/3273/140823/3853/2150/5196/8542	8
BP	GO:0071375	cellular response to peptide hormone stimulus	37/1127	325/18862	0.000127593	0.00154194	0.00111314	5919/2805/9296/537/10890/445/9550/1373/54741/8992/79746/197/64710/677/1906/2200/2950/5167/858/2538/185/6464/9971/55023/10458/5105/5166/5319/6599/3481/4780/3484/857/5315/5573/533/529	37
BP	GO:0032496	response to lipopolysaccharide	37/1127	326/18862	0.000135862	0.00163821	0.00118264	4257/387/445/9516/3929/6648/929/1373/824/3146/1906/9536/5595/949/7001/2950/3727/6678/9971/8754/5105/1244/558/3725/7035/27063/2353/3248/5196/11221/10935/57402/9076/1543/3383/3764/57817	37
BP	GO:0071692	protein localization to extracellular region	41/1127	375/18862	0.000138393	0.00166502	0.001202	5478/2243/375/2266/2244/6288/10890/3479/348/5950/283/173/55450/6659/3418/4035/25874/2200/2182/19/301/3993/284119/8431/1956/9971/8754/5066/7430/4681/2201/3123/5319/1803/2150/27063/51714/4074/3783/6422/222546	41
BP	GO:0071621	granulocyte chemotaxis	19/1127	124/18862	0.000139303	0.00167225	0.00120722	682/5478/5919/6288/3929/4192/708/7057/1906/5595/301/3958/5880/9353/5319/1803/5196/57402/6364	19
BP	GO:2000345	regulation of hepatocyte proliferation	6/1127	15/18862	0.000140757	0.00168597	0.00121712	3249/1361/4192/55959/5764/55679	6
BP	GO:0007566	embryo implantation	11/1127	50/18862	0.00014265	0.00170421	0.00123029	682/3020/3021/6647/6159/708/81671/6781/7076/100506013/7216	11
BP	GO:1904377	positive regulation of protein localization to cell periphery	13/1127	67/18862	0.00014291	0.00170421	0.00123029	10399/3675/4035/8878/3958/2181/1956/391/7430/3688/10551/6711/8766	13
BP	GO:0043484	regulation of RNA splicing	21/1127	145/18862	0.00014482	0.0017232	0.001244	6207/1655/5935/3190/9588/4691/9939/3181/708/3187/7009/79026/27316/3185/1153/283375/3178/5430/2521/54407/55796	21
BP	GO:0035376	sterol import	5/1127	10/18862	0.000147691	0.00173157	0.00125004	55004/336/4035/949/345	5
BP	GO:0051918	negative regulation of fibrinolysis	5/1127	10/18862	0.000147691	0.00173157	0.00125004	1361/350/3273/7057/5340	5
BP	GO:0070327	thyroid hormone transport	5/1127	10/18862	0.000147691	0.00173157	0.00125004	6906/1428/7276/1244/23428	5
BP	GO:0070508	cholesterol import	5/1127	10/18862	0.000147691	0.00173157	0.00125004	55004/336/4035/949/345	5
BP	GO:0016137	glycoside metabolic process	7/1127	21/18862	0.000147763	0.00173157	0.00125004	1645/1646/8644/1109/57016/57733/231	7
BP	GO:0072574	hepatocyte proliferation	7/1127	21/18862	0.000147763	0.00173157	0.00125004	3249/1361/2267/4192/55959/5764/55679	7
BP	GO:0072575	epithelial cell proliferation involved in liver morphogenesis	7/1127	21/18862	0.000147763	0.00173157	0.00125004	3249/1361/2267/4192/55959/5764/55679	7
BP	GO:0045926	negative regulation of growth	30/1127	245/18862	0.000151459	0.00177106	0.00127854	4502/57142/10399/5950/4501/4499/4495/3273/4493/4494/4496/2023/684/5167/1029/10512/9353/2203/1026/5515/5931/7869/2719/8482/11221/65981/6422/54825/51316/55384	30
BP	GO:0032355	response to estradiol	19/1127	125/18862	0.000155242	0.00181138	0.00130765	445/1499/847/1728/595/3673/2950/3015/301/1956/5066/1938/1244/10095/5764/7035/3248/3485/6422	19
BP	GO:0019882	antigen processing and presentation	29/1127	234/18862	0.000157123	0.00182938	0.00132065	567/375/1173/10890/832/10134/563/83871/10540/5693/7057/1535/3685/1510/1512/5690/1175/1509/22872/1514/3127/3835/3106/8673/3123/1639/3140/3383/10053	29
BP	GO:0009144	purine nucleoside triphosphate metabolic process	15/1127	86/18862	0.00016002	0.00185514	0.00133924	226/7114/506/518/4508/516/4513/5901/9551/522/2023/4833/283120/498/5315	15
BP	GO:0030901	midbrain development	15/1127	86/18862	0.00016002	0.00185514	0.00133924	27089/60/998/801/387/1499/805/808/522/5015/1152/10971/10409/6422/3280	15
BP	GO:0006739	NADP metabolic process	9/1127	35/18862	0.000161418	0.00186734	0.00134805	3417/1728/5226/3418/5223/51181/23530/7086/6888	9
BP	GO:1903201	regulation of oxidative stress-induced cell death	13/1127	68/18862	0.000167155	0.00192959	0.00139299	5478/6647/10399/6648/7295/5034/8876/6421/2876/3315/4780/51765/5074	13
BP	GO:2001235	positive regulation of apoptotic signaling pathway	19/1127	126/18862	0.000172761	0.00199006	0.00143664	5499/6647/10399/6188/10134/6135/6201/4055/7057/183/6154/598/6421/1075/51330/6422/90427/857/81618	19
BP	GO:0021762	substantia nigra development	10/1127	43/18862	0.000174696	0.00200719	0.00144901	60/998/801/387/805/808/522/1152/10971/10409	10
BP	GO:0050920	regulation of chemotaxis	28/1127	224/18862	0.000174989	0.00200719	0.00144901	5919/7114/3929/3273/4192/708/3146/7057/7852/1948/1906/727/3673/5595/2950/5880/10512/9353/5764/4681/1803/7869/2150/8482/3315/57402/57509/347733	28
BP	GO:0061572	actin filament bundle organization	22/1127	158/18862	0.000182227	0.00208516	0.0015053	389/998/71/387/5216/3925/3936/7168/6624/5358/10083/6281/2316/1809/3397/4082/4070/10458/7791/7430/6422/5074	22
BP	GO:0015850	organic hydroxy compound transport	32/1127	271/18862	0.000182943	0.00208516	0.0015053	60/341/348/1191/5950/366/55004/10599/1582/1645/5244/5444/336/4035/1109/949/345/302/19/183/8431/6526/185/140606/9971/1244/25987/29881/6554/5045/337/857	32
BP	GO:1903532	positive regulation of secretion by cell	32/1127	271/18862	0.000182943	0.00208516	0.0015053	5478/2243/375/2266/2244/1361/537/3479/5950/283/55450/6659/4035/25874/1906/3916/9536/2182/8431/1956/9971/8754/7430/8673/3123/5319/2150/27063/6382/51714/3783/222546	32
BP	GO:1903829	positive regulation of cellular protein localization	34/1127	295/18862	0.000186418	0.00212031	0.00153068	7534/57142/10399/54741/5901/3675/2040/11261/4035/59286/8878/2810/2316/3728/8826/3958/2066/6526/2181/10971/1956/7529/7037/5880/5621/391/5764/7430/3688/22885/81603/10551/6711/8766	34
BP	GO:0010770	positive regulation of cell morphogenesis involved in differentiation	14/1127	78/18862	0.000191816	0.00217713	0.00157169	2243/2266/998/2244/10109/5034/4192/708/6281/2316/3037/65981/23363/55679	14
BP	GO:0097530	granulocyte migration	21/1127	148/18862	0.000193972	0.00219699	0.00158603	682/5478/5919/6288/9948/3929/4192/708/7057/1906/5595/301/3958/5880/9353/391/5319/1803/5196/57402/6364	21
BP	GO:0001558	regulation of cell growth	43/1127	406/18862	0.000195496	0.00220963	0.00159516	3249/3020/998/3021/3479/57142/10399/348/2335/55004/3273/10591/7852/3487/4035/2023/1906/684/2810/5167/1029/183/1956/1382/185/1981/10512/9353/2203/1026/5515/5931/7869/8482/58191/65981/6422/3484/54825/4323/8766/55384/57817	43
BP	GO:0046942	carboxylic acid transport	33/1127	284/18862	0.000197826	0.00223132	0.00161081	10550/366/10599/10786/5660/1645/5244/5320/51660/25874/1906/9536/1109/1579/301/3993/8431/9056/1836/9971/1244/284111/59272/8529/3688/5319/6520/6554/2348/6576/23428/27165/54407	33
BP	GO:0050679	positive regulation of epithelial cell proliferation	26/1127	203/18862	0.000198942	0.00223459	0.00161317	3249/998/3479/57142/283/116844/4192/3146/595/858/3037/3397/8828/255324/1956/185/2896/5764/51162/3481/5654/374/9076/6422/100506013/3912	26
BP	GO:1902905	positive regulation of supramolecular fiber organization	26/1127	203/18862	0.000198942	0.00223459	0.00161317	389/375/998/9948/6188/348/387/10109/1191/11034/5216/7168/1906/6281/2316/3397/351/10458/10095/2876/1639/2150/2934/6422/3383/274	26
BP	GO:0030595	leukocyte chemotaxis	28/1127	226/18862	0.000203434	0.00227561	0.00164278	682/5478/5919/6288/3929/4192/708/3146/7057/7852/1906/727/5595/301/3958/5880/9353/5764/4681/5319/1803/2150/5196/58191/57402/57509/2321/6364	28
BP	GO:0032869	cellular response to insulin stimulus	28/1127	226/18862	0.000203434	0.00227561	0.00164278	5919/2805/9296/537/10890/9550/8992/79746/197/64710/677/2950/5167/858/2538/6464/9971/55023/10458/5105/5166/5319/6599/3481/3484/5315/533/529	28
BP	GO:1903725	regulation of phospholipid metabolic process	9/1127	36/18862	0.000203913	0.00227626	0.00164325	375/3417/341/824/11261/949/5154/2181/9971	9
BP	GO:0042776	mitochondrial ATP synthesis coupled proton transport	7/1127	22/18862	0.000205593	0.00228091	0.00164661	506/518/4508/516/9551/522/498	7
BP	GO:0055093	response to hyperoxia	7/1127	22/18862	0.000205593	0.00228091	0.00164661	664/847/4508/4519/1026/1543/857	7
BP	GO:0072576	liver morphogenesis	7/1127	22/18862	0.000205593	0.00228091	0.00164661	3249/1361/2267/4192/55959/5764/55679	7
BP	GO:0006103	2-oxoglutarate metabolic process	6/1127	16/18862	0.00021385	0.00235595	0.00170078	2805/3417/3418/2806/6898/5264	6
BP	GO:0051014	actin filament severing	6/1127	16/18862	0.00021385	0.00235595	0.00170078	1072/11034/4627/822/2934/50853	6
BP	GO:0070365	hepatocyte differentiation	6/1127	16/18862	0.00021385	0.00235595	0.00170078	1373/3673/301/5105/3875/1543	6
BP	GO:0008631	intrinsic apoptotic signaling pathway in response to oxidative stress	10/1127	44/18862	0.000214098	0.00235595	0.00170078	5478/6647/10550/6648/5034/8876/6421/2876/3315/4780	10
BP	GO:0043254	regulation of protein-containing complex assembly	46/1127	446/18862	0.000218977	0.00240475	0.00173602	9168/389/3020/375/7114/998/3021/832/10399/6188/348/10109/7417/1191/5216/3273/7341/23521/3925/3936/6624/29103/3146/54751/29766/56937/19/822/3958/1981/10458/7037/1366/9353/10095/1015/3320/1639/2934/6711/8543/90427/3383/274/22943/50853	46
BP	GO:0002685	regulation of leukocyte migration	26/1127	205/18862	0.000232922	0.00255271	0.00184282	5919/387/3929/4192/708/3146/7057/1906/727/3673/5595/301/3958/351/5880/9353/391/5764/4681/1803/2150/57402/3383/57509/4323/6364	26
BP	GO:0055067	monovalent inorganic cation homeostasis	22/1127	161/18862	0.000239502	0.00261952	0.00189106	9296/537/506/9550/8992/5009/887/11261/1906/5595/1579/481/183/185/2896/483/5166/476/252839/8529/533/529	22
BP	GO:0001101	response to acid chemical	18/1127	119/18862	0.000243722	0.0026603	0.0019205	445/55004/1373/1728/824/7009/9804/1906/2950/1282/5105/1036/3856/5764/1291/10400/231/3383	18
BP	GO:0001706	endoderm formation	11/1127	53/18862	0.000246938	0.00268838	0.00194077	2335/1284/3685/3909/2627/7448/3914/1291/4323/22943/3912	11
BP	GO:0009141	nucleoside triphosphate metabolic process	17/1127	109/18862	0.000247287	0.00268838	0.00194077	226/7114/506/518/4508/516/4513/5901/9551/522/2023/5167/4833/283120/1503/498/5315	17
BP	GO:0019042	viral latency	5/1127	11/18862	0.00025744	0.002782	0.00200835	5478/2547/64710/7520/3159	5
BP	GO:0034378	chylomicron assembly	5/1127	11/18862	0.00025744	0.002782	0.00200835	348/5034/336/345/337	5
BP	GO:0036363	transforming growth factor beta activation	5/1127	11/18862	0.00025744	0.002782	0.00200835	2280/3694/3685/2627/5045	5
BP	GO:0046683	response to organophosphorus	19/1127	130/18862	0.000261387	0.00281902	0.00203508	682/3939/6647/445/366/1373/1645/677/6678/351/189/5105/1036/3725/10518/7430/6781/2353/6382	19
BP	GO:0043627	response to estrogen	13/1127	71/18862	0.000262199	0.00282216	0.00203734	3939/100133941/595/3880/5272/2627/1244/10095/2625/3485/6422/857/4323	13
BP	GO:0022407	regulation of cell-cell adhesion	45/1127	437/18862	0.000264358	0.00283975	0.00205004	2243/2266/998/2244/3479/6188/387/445/2267/100133941/4192/6659/3146/7001/3956/10272/8876/53827/3037/301/3958/5105/7037/57678/5621/4680/3572/3123/10653/5340/1803/3481/2625/3329/11221/27242/3485/3383/857/3280/4072/5573/64332/5074/8728	45
BP	GO:0008544	epidermis development	47/1127	463/18862	0.000270644	0.00290152	0.00209464	6647/1499/823/1825/677/10083/8644/2810/3728/224/826/3852/1308/3880/301/5154/135228/6768/3909/3911/3855/2069/64065/1956/1382/2627/3853/3918/8754/79413/1514/3914/3875/3856/5351/3123/1830/5652/1832/2012/8796/5493/5045/3280/192666/84189/5920	47
BP	GO:0071711	basement membrane organization	8/1127	30/18862	0.000284395	0.00304291	0.00219671	3249/858/1282/3913/3914/10653/857/3912	8
BP	GO:0010594	regulation of endothelial cell migration	28/1127	231/18862	0.000293308	0.00313209	0.00226109	7114/506/350/348/387/5176/3273/3146/7057/6997/1906/949/3728/301/183/8828/6678/2896/9353/5764/6781/1647/2625/498/3315/4780/2752/5606	28
BP	GO:0034341	response to interferon-gamma	25/1127	197/18862	0.000301714	0.00321551	0.00232131	10581/567/2597/998/4502/445/10410/3263/7341/23521/6997/1906/684/3127/3106/7791/3123/81603/2934/58191/9076/9111/3383/6364/10346	25
BP	GO:0022612	gland morphogenesis	17/1127	111/18862	0.000308681	0.00327686	0.0023656	3249/998/1361/2267/823/4192/7052/55959/5154/6926/3911/10512/5764/6422/857/55679/1999	17
BP	GO:1905954	positive regulation of lipid localization	17/1127	111/18862	0.000308681	0.00327686	0.0023656	718/348/1582/123/2180/5244/5444/4035/1906/9536/949/1579/302/19/8529/3688/857	17
BP	GO:0050708	regulation of protein secretion	32/1127	279/18862	0.000310263	0.00328721	0.00237307	5478/2243/375/2266/2244/6288/3479/348/5950/283/55450/6659/3418/4035/25874/2182/301/3993/8431/1956/9971/8754/5066/7430/3123/5319/1803/2150/27063/3783/6422/222546	32
BP	GO:0060192	negative regulation of lipase activity	6/1127	17/18862	0.000313844	0.00331219	0.0023911	341/336/345/301/6272/27329	6
BP	GO:0071071	regulation of phospholipid biosynthetic process	6/1127	17/18862	0.000313844	0.00331219	0.0023911	3417/824/11261/5154/2181/9971	6
BP	GO:0006882	cellular zinc ion homeostasis	9/1127	38/18862	0.000316979	0.00333228	0.0024056	4502/4501/4499/4495/4493/4494/4496/283375/64116	9
BP	GO:0071548	response to dexamethasone	9/1127	38/18862	0.000316979	0.00333228	0.0024056	445/5176/1373/1906/1956/5105/1244/9076/3383	9
BP	GO:0030316	osteoclast differentiation	15/1127	92/18862	0.000344231	0.00361176	0.00260737	2778/537/84293/2200/302/7071/10272/135228/7037/3726/2719/2353/7018/6422/79705	15
BP	GO:1903428	positive regulation of reactive oxygen species biosynthetic process	11/1127	55/18862	0.000347424	0.00363821	0.00262646	445/1191/6648/4513/1906/1535/6526/283120/3320/3383/23576	11
BP	GO:0043200	response to amino acid	16/1127	102/18862	0.000348241	0.00363972	0.00262755	445/55004/1373/1728/824/7009/9804/1906/2950/1282/5105/1036/5764/1291/10400/3383	16
BP	GO:0002687	positive regulation of leukocyte migration	19/1127	133/18862	0.000351751	0.00366227	0.00264383	5919/387/3929/4192/708/3146/7057/1906/3673/5595/3958/351/5880/5764/2150/57402/3383/4323/6364	19
BP	GO:0045727	positive regulation of translation	19/1127	133/18862	0.000351751	0.00366227	0.00264383	6125/5935/6191/79727/7555/6659/708/7057/1984/3673/5595/26986/6154/1153/1981/1938/5315/23654/1968	19
BP	GO:0006749	glutathione metabolic process	12/1127	64/18862	0.000356291	0.00369533	0.00266769	6647/3417/10550/9027/2950/9022/2938/2876/2948/2939/4780/2941	12
BP	GO:0033344	cholesterol efflux	12/1127	64/18862	0.000356291	0.00369533	0.00266769	341/348/55004/5444/336/4035/949/345/19/25987/337/857	12
BP	GO:0032373	positive regulation of sterol transport	8/1127	31/18862	0.000363412	0.0037548	0.00271063	348/1582/5244/5444/4035/302/19/857	8
BP	GO:0032376	positive regulation of cholesterol transport	8/1127	31/18862	0.000363412	0.0037548	0.00271063	348/1582/5244/5444/4035/302/19/857	8
BP	GO:0060326	cell chemotaxis	34/1127	306/18862	0.000370145	0.00381707	0.00275558	682/5478/5919/7114/6288/3929/3273/4192/708/3146/7057/7852/1906/727/5595/2950/301/3958/185/5880/9353/391/5764/4681/5319/1803/2150/5196/58191/3315/57402/57509/2321/6364	34
BP	GO:0032528	microvillus organization	7/1127	24/18862	0.000375554	0.00384357	0.00277471	6624/10083/53827/7430/688/54825/51765	7
BP	GO:0051004	regulation of lipoprotein lipase activity	7/1127	24/18862	0.000375554	0.00384357	0.00277471	350/341/345/5045/337/6272/27329	7
BP	GO:0071294	cellular response to zinc ion	7/1127	24/18862	0.000375554	0.00384357	0.00277471	4502/4501/4499/4495/4493/4494/4496	7
BP	GO:1903901	negative regulation of viral life cycle	7/1127	24/18862	0.000375554	0.00384357	0.00277471	5478/10581/325/10410/684/81603/2934	7
BP	GO:0009409	response to cold	10/1127	47/18862	0.000379545	0.00386533	0.00279042	6648/4513/37/1153/79054/3320/2353/3329/51316/27344	10
BP	GO:0044275	cellular carbohydrate catabolic process	10/1127	47/18862	0.000379545	0.00386533	0.00279042	7167/801/5499/5236/5226/5223/3146/2538/57733/5836	10
BP	GO:0001649	osteoblast differentiation	27/1127	223/18862	0.000379822	0.00386533	0.00279042	3020/3021/2778/537/506/6209/3479/1655/847/9260/3336/255743/27316/3727/6238/3491/1462/3183/3726/2201/1291/3572/3481/8482/51232/7171/6422	27
BP	GO:0006909	phagocytosis	40/1127	381/18862	0.000384569	0.0039063	0.00282	725/722/718/60/998/71/6647/1401/10399/10109/3929/929/311/83871/197/4627/3146/7057/336/4035/1535/3673/5595/949/7052/3685/301/10458/5880/3953/4240/558/391/10095/3320/3688/2150/2934/3561/51454	40
BP	GO:2001237	negative regulation of extrinsic apoptotic signaling pathway	16/1127	103/18862	0.000389843	0.00395246	0.00285332	2243/2266/2244/3479/7057/7001/2950/3685/3958/55023/598/8795/2876/5196/3383/64114	16
BP	GO:0005977	glycogen metabolic process	13/1127	74/18862	0.000400011	0.00404796	0.00292226	801/5499/3479/5236/3146/5167/2538/2632/3953/27232/3572/3481/5836	13
BP	GO:0043388	positive regulation of DNA binding	11/1127	56/18862	0.00040933	0.00413454	0.00298476	801/3479/1499/7295/808/3146/3673/8721/3005/2625/3280	11
BP	GO:0006570	tyrosine metabolic process	5/1127	12/18862	0.000419638	0.00420726	0.00303726	3242/3081/2184/6898/143941	5
BP	GO:0034372	very-low-density lipoprotein particle remodeling	5/1127	12/18862	0.000419638	0.00420726	0.00303726	348/336/345/9971/337	5
BP	GO:0042538	hyperosmotic salinity response	5/1127	12/18862	0.000419638	0.00420726	0.00303726	2547/4519/7520/9076/231	5
BP	GO:0046689	response to mercury ion	5/1127	12/18862	0.000419638	0.00420726	0.00303726	682/366/4519/1244/6898	5
BP	GO:0007369	gastrulation	23/1127	179/18862	0.000432332	0.00432652	0.00312336	6194/10399/2335/1284/3675/5015/3673/3685/3909/7358/2627/7448/3914/1291/3688/2719/7296/6422/100506013/5573/4323/22943/3912	23
BP	GO:0010769	regulation of cell morphogenesis involved in differentiation	15/1127	94/18862	0.000436812	0.00435525	0.0031441	2243/2266/998/2244/10109/5034/4192/708/6281/2316/3037/4070/65981/23363/55679	15
BP	GO:1904035	regulation of epithelial cell apoptotic process	15/1127	94/18862	0.000436812	0.00435525	0.0031441	2243/2266/2244/831/4192/677/7057/8644/283120/5319/2934/2625/4780/3383/6272	15
BP	GO:0006740	NADPH regeneration	6/1127	18/18862	0.000447076	0.00444939	0.00321206	3417/5226/5223/23530/7086/6888	6
BP	GO:0002698	negative regulation of immune effector process	18/1127	125/18862	0.000451234	0.00448253	0.00323598	725/722/710/708/336/7009/684/966/301/3958/5094/5272/2896/3106/114770/11221/5654/2	18
BP	GO:0006073	cellular glucan metabolic process	13/1127	75/18862	0.000457851	0.00453164	0.00327143	801/5499/3479/5236/3146/5167/2538/2632/3953/27232/3572/3481/5836	13
BP	GO:0044042	glucan metabolic process	13/1127	75/18862	0.000457851	0.00453164	0.00327143	801/5499/3479/5236/3146/5167/2538/2632/3953/27232/3572/3481/5836	13
BP	GO:0009072	aromatic amino acid family metabolic process	8/1127	32/18862	0.000459412	0.00453879	0.0032766	3242/3081/2184/80150/6898/5092/143941/130013	8
BP	GO:0001704	formation of primary germ layer	17/1127	115/18862	0.000471961	0.00465428	0.00335997	2335/1284/3675/3673/3685/3909/2627/7448/3914/1291/3688/7296/100506013/5573/4323/22943/3912	17
BP	GO:0055069	zinc ion homeostasis	9/1127	40/18862	0.000477413	0.00469948	0.0033926	4502/4501/4499/4495/4493/4494/4496/283375/64116	9
BP	GO:0032370	positive regulation of lipid transport	14/1127	85/18862	0.000482399	0.00473994	0.00342181	348/1582/2180/5244/5444/4035/1906/9536/1579/302/19/8529/3688/857	14
BP	GO:0090277	positive regulation of peptide hormone secretion	15/1127	95/18862	0.000490589	0.00481169	0.0034736	2243/2266/2244/5950/55450/6659/4035/25874/2182/8431/1956/9971/3123/51714/222546	15
BP	GO:0007492	endoderm development	13/1127	76/18862	0.000522625	0.0051095	0.0036886	2335/1284/677/3685/3909/2627/7448/3914/1291/100506013/4323/22943/3912	13
BP	GO:1904019	epithelial cell apoptotic process	17/1127	116/18862	0.000522841	0.0051095	0.0036886	2243/2266/2244/831/4192/677/7057/8644/3875/3856/283120/5319/2934/2625/4780/3383/6272	17
BP	GO:0031640	killing of cells of other organism	12/1127	67/18862	0.000551606	0.00538089	0.00388452	2597/3078/3273/3151/140823/5272/3853/598/2150/5196/8542/57817	12
BP	GO:0030865	cortical cytoskeleton organization	11/1127	58/18862	0.000561092	0.00546358	0.00394422	389/9948/387/3936/3993/22836/5880/391/7430/390/7094	11
BP	GO:0097191	extrinsic apoptotic signaling pathway	26/1127	217/18862	0.000566977	0.00551097	0.00397843	2243/2266/2244/5499/3479/4055/7057/7001/2950/3685/183/3958/55023/598/8795/3875/3856/2876/51330/5196/6422/3383/857/6272/81618/64114	26
BP	GO:0048002	antigen processing and presentation of peptide antigen	24/1127	194/18862	0.000573555	0.00556492	0.00401737	567/375/1173/832/10134/563/10540/5693/1535/3685/1510/5690/1175/1509/22872/1514/3127/3835/3106/8673/3123/1639/3140/10053	24
BP	GO:0015721	bile acid and bile salt transport	8/1127	33/18862	0.000574989	0.00556885	0.00402021	366/10599/1645/1109/8431/9971/1244/6554	8
BP	GO:0046596	regulation of viral entry into host cell	9/1127	41/18862	0.000579649	0.00560396	0.00404556	10581/325/10410/5034/3956/3123/81603/2934/10346	9
BP	GO:0043588	skin development	42/1127	415/18862	0.000595607	0.00574798	0.00414952	2778/823/3925/3675/1825/3694/51599/677/8644/3673/2810/3728/826/3852/3880/301/5154/135228/6768/3911/3855/2069/64065/1956/2707/2627/3853/8754/79413/1514/3875/3856/1830/5652/1832/8796/5493/9076/5045/192666/1364/5920	42
BP	GO:0006112	energy reserve metabolic process	14/1127	87/18862	0.000614553	0.00592027	0.0042739	2778/801/5499/3479/5236/3146/5167/2538/2632/3953/27232/3572/3481/5836	14
BP	GO:0030307	positive regulation of cell growth	21/1127	161/18862	0.000617127	0.00593451	0.00428418	3249/3020/998/3021/3479/2335/10591/7852/4035/1906/2810/1956/1382/1981/8482/58191/6422/3484/4323/8766/57817	21
BP	GO:0015908	fatty acid transport	20/1127	150/18862	0.000620723	0.0059585	0.0043015	348/10550/123/2180/5320/7057/2806/1906/9536/1579/2182/7069/301/2181/2168/8529/3688/5319/27165/54407	20
BP	GO:0071496	cellular response to external stimulus	33/1127	303/18862	0.000638296	0.00610562	0.0044077	2805/664/213/3920/29103/4055/8644/3673/5595/2950/7071/1956/1981/9971/5105/5166/283375/8795/476/558/3725/5764/3178/1026/27063/2353/1647/2348/6422/4780/3383/51765/54407	33
BP	GO:0003014	renal system process	17/1127	118/18862	0.00063888	0.00610562	0.0044077	3675/1906/8644/1579/3037/55959/183/185/10916/6781/8529/2150/2934/231/1364/5573/8766	17
BP	GO:0009066	aspartate family amino acid metabolic process	10/1127	50/18862	0.000639805	0.00610562	0.0044077	2805/10247/445/1428/5352/2806/27232/23743/80150/10993	10
BP	GO:0042104	positive regulation of activated T cell proliferation	7/1127	26/18862	0.000642606	0.00610562	0.0044077	3479/6188/100133941/3146/57678/3481/3485	7
BP	GO:0002921	negative regulation of humoral immune response	5/1127	13/18862	0.000648454	0.00610562	0.0044077	725/722/710/966/2	5
BP	GO:0010755	regulation of plasminogen activation	5/1127	13/18862	0.000648454	0.00610562	0.0044077	3249/1361/7057/2023/2161	5
BP	GO:0019627	urea metabolic process	5/1127	13/18862	0.000648454	0.00610562	0.0044077	445/1373/5009/9971/1559	5
BP	GO:0032530	regulation of microvillus organization	5/1127	13/18862	0.000648454	0.00610562	0.0044077	6624/10083/7430/688/54825	5
BP	GO:0034379	very-low-density lipoprotein particle assembly	5/1127	13/18862	0.000648454	0.00610562	0.0044077	375/341/5034/345/2181	5
BP	GO:0051764	actin crosslink formation	5/1127	13/18862	0.000648454	0.00610562	0.0044077	3936/2316/1809/4082/10458	5
BP	GO:0071941	nitrogen cycle metabolic process	5/1127	13/18862	0.000648454	0.00610562	0.0044077	445/1373/5009/9971/1559	5
BP	GO:1902041	regulation of extrinsic apoptotic signaling pathway via death domain receptors	11/1127	59/18862	0.000653013	0.00613786	0.00443099	2243/2266/2244/7057/3958/598/8795/2876/6422/3383/64114	11
BP	GO:1902105	regulation of leukocyte differentiation	31/1127	279/18862	0.000657604	0.00617031	0.00445441	28959/2778/6647/537/325/55365/2547/84293/4192/6659/3146/677/2200/7001/7071/10272/8876/301/5105/558/3725/3106/3123/114770/2353/5196/2625/11221/6422/64332/4323	31
BP	GO:1990778	protein localization to cell periphery	35/1127	329/18862	0.000682745	0.00639512	0.0046167	682/60/1173/10890/10399/10550/83871/3675/4035/6281/8878/2316/3728/481/3958/3911/2181/1956/598/483/3875/391/81693/7430/8673/3688/10551/6711/10267/857/55690/4323/64114/8766/9528	35
BP	GO:0045862	positive regulation of proteolysis	38/1127	367/18862	0.000692593	0.00647617	0.00467521	3249/10399/6188/348/1191/2335/10550/10134/3818/7341/4627/3146/27018/2023/3336/6923/2264/1512/10440/3491/64065/1509/2896/8754/351/8795/64063/1075/2934/9131/3329/2161/5045/4780/857/1364/4323/444	38
BP	GO:0014075	response to amine	9/1127	42/18862	0.000699123	0.00652596	0.00471115	801/6647/445/1373/1728/808/3673/3176/3383	9
BP	GO:0002688	regulation of leukocyte chemotaxis	17/1127	119/18862	0.00070474	0.00656706	0.00474083	5919/3929/4192/708/3146/7057/1906/727/5595/5880/9353/5764/4681/1803/2150/57402/57509	17
BP	GO:1901661	quinone metabolic process	8/1127	34/18862	0.000712965	0.00663229	0.00478791	1645/1646/8644/1109/57016/8529/231/57834	8
BP	GO:1903037	regulation of leukocyte cell-cell adhesion	35/1127	330/18862	0.000721095	0.00669642	0.00483421	998/3479/6188/387/445/2267/100133941/4192/6659/3146/7001/3956/8876/3037/301/3958/5105/7037/57678/5621/3572/3123/1803/3481/2625/3329/11221/27242/3485/3383/857/3280/5573/64332/5074	35
BP	GO:0030324	lung development	21/1127	163/18862	0.000726841	0.00673822	0.00486439	998/5499/5950/3290/3675/3694/3146/5595/10272/5154/1512/3911/83716/6678/1956/2627/5764/2719/3280/157506/4323	21
BP	GO:0035592	establishment of protein localization to extracellular region	38/1127	368/18862	0.000729137	0.00674794	0.00487141	5478/2243/375/2266/2244/6288/10890/3479/348/5950/283/173/55450/6659/3418/4035/25874/2182/19/301/3993/284119/8431/1956/9971/8754/5066/7430/3123/5319/1803/2150/27063/51714/4074/3783/6422/222546	38
BP	GO:0001763	morphogenesis of a branching structure	23/1127	186/18862	0.000743989	0.00687365	0.00496215	5499/57142/1499/4192/6997/1906/7052/255743/183/5154/6926/1512/1282/6768/3911/4070/10512/9353/10653/2719/6422/157506/4323	23
BP	GO:0050994	regulation of lipid catabolic process	11/1127	60/18862	0.000757123	0.0069712	0.00503258	5919/3417/341/336/949/345/2168/13/337/57104/27329	11
BP	GO:2001244	positive regulation of intrinsic apoptotic signaling pathway	11/1127	60/18862	0.000757123	0.0069712	0.00503258	6647/10399/6188/10134/6135/6201/6154/598/6421/90427/857	11
BP	GO:0048145	regulation of fibroblast proliferation	13/1127	79/18862	0.00076526	0.00703416	0.00507803	3479/2335/6277/1499/2495/2950/183/5154/2069/1026/5319/6422/5074	13
BP	GO:0036473	cell death in response to oxidative stress	14/1127	89/18862	0.000776192	0.00712255	0.00514184	5478/6647/10399/10550/6648/7295/5034/8876/6421/2876/3315/4780/51765/5074	14
BP	GO:0072507	divalent inorganic cation homeostasis	48/1127	499/18862	0.000780617	0.00715103	0.0051624	2805/4502/6288/801/348/4501/664/3827/4499/805/4495/2280/4493/10134/100133941/4494/808/55450/309/4496/887/3146/7852/4035/7009/1906/2782/481/7052/3685/858/1956/185/351/283375/79054/5621/10518/6781/5319/2150/7178/51714/57402/3074/64116/857/793	48
BP	GO:0010001	glial cell differentiation	25/1127	210/18862	0.000787697	0.0072037	0.00520043	6647/9948/1191/664/79727/4192/6659/54587/7852/4035/5595/2950/1956/2896/351/3913/26022/5764/3572/2934/57211/11221/27242/3280/274	25
BP	GO:0072073	kidney epithelium development	18/1127	131/18862	0.00079664	0.0072732	0.0052506	1499/847/100133941/8842/255743/8826/183/3911/4070/3913/9353/10409/2719/6382/2625/6422/3280/793	18
BP	GO:1903039	positive regulation of leukocyte cell-cell adhesion	27/1127	234/18862	0.00080593	0.00734563	0.00530288	998/3479/6188/387/100133941/4192/6659/3146/3956/8876/3037/301/5105/7037/57678/3572/3123/1803/3481/2625/3329/11221/3485/3383/857/3280/64332	27
BP	GO:0009065	glutamine family amino acid catabolic process	7/1127	27/18862	0.000823202	0.00744042	0.00537132	2805/2184/2806/80150/27165/2752/23576	7
BP	GO:0010955	negative regulation of protein processing	7/1127	27/18862	0.000823202	0.00744042	0.00537132	1361/831/7057/26022/5621/4102/9528	7
BP	GO:0015985	energy coupled proton transport, down electrochemical gradient	7/1127	27/18862	0.000823202	0.00744042	0.00537132	506/518/4508/516/9551/522/498	7
BP	GO:0015986	ATP synthesis coupled proton transport	7/1127	27/18862	0.000823202	0.00744042	0.00537132	506/518/4508/516/9551/522/498	7
BP	GO:1903318	negative regulation of protein maturation	7/1127	27/18862	0.000823202	0.00744042	0.00537132	1361/831/7057/26022/5621/4102/9528	7
BP	GO:0034612	response to tumor necrosis factor	34/1127	320/18862	0.000826365	0.00745657	0.00538297	7114/10399/6188/445/929/5693/4055/677/7057/6997/1906/5595/2950/255743/3037/5690/9971/8754/5105/3875/1244/3856/51330/2150/27063/2625/58191/27242/9076/6422/4780/3383/6364/57817	34
BP	GO:0046006	regulation of activated T cell proliferation	9/1127	43/18862	0.000837942	0.00751031	0.00542177	3479/6188/100133941/3146/57678/5621/3481/3485/5573	9
BP	GO:0006525	arginine metabolic process	6/1127	20/18862	0.000842032	0.00751031	0.00542177	445/5009/2184/9056/64116/23576	6
BP	GO:0010310	regulation of hydrogen peroxide metabolic process	6/1127	20/18862	0.000842032	0.00751031	0.00542177	3240/6648/4513/7001/5880/23530	6
BP	GO:0032928	regulation of superoxide anion generation	6/1127	20/18862	0.000842032	0.00751031	0.00542177	6647/1401/2950/5446/1956/2150	6
BP	GO:0051412	response to corticosterone	6/1127	20/18862	0.000842032	0.00751031	0.00542177	801/808/595/1026/2353/3283	6
BP	GO:1902176	negative regulation of oxidative stress-induced intrinsic apoptotic signaling pathway	6/1127	20/18862	0.000842032	0.00751031	0.00542177	5478/6648/8876/2876/3315/4780	6
BP	GO:1902644	tertiary alcohol metabolic process	6/1127	20/18862	0.000842032	0.00751031	0.00542177	1645/1646/8644/1109/57016/231	6
BP	GO:0002791	regulation of peptide secretion	33/1127	308/18862	0.000847665	0.00754813	0.00544907	5478/2243/375/2266/2244/6288/3479/348/5950/283/55450/6659/3418/4035/25874/2182/301/3993/8431/1956/9971/8754/5066/7430/3123/5319/1803/2150/27063/51714/3783/6422/222546	33
BP	GO:0006626	protein targeting to mitochondrion	15/1127	100/18862	0.000852372	0.00757757	0.00547033	10134/54741/29103/9804/59286/130916/3308/10440/140823/5880/3320/22885/9131/3329/665	15
BP	GO:0051896	regulation of protein kinase B signaling	28/1127	247/18862	0.000859789	0.00759371	0.00548198	57142/10399/118788/79727/7295/708/7057/1646/8644/2264/5154/2066/2069/255324/1956/117145/5880/558/391/283120/23533/3320/2876/3688/3481/2625/374/2159	28
BP	GO:0060541	respiratory system development	23/1127	188/18862	0.0008629	0.00759371	0.00548198	998/5499/445/5950/3290/3675/3694/3146/5595/10272/5154/1512/3911/83716/6678/1956/2627/5764/10409/2719/3280/157506/4323	23
BP	GO:0001895	retina homeostasis	13/1127	80/18862	0.000864689	0.00759371	0.00548198	567/60/71/5284/6647/5052/563/213/8842/10083/10518/7018/3315	13
BP	GO:0014032	neural crest cell development	13/1127	80/18862	0.000864689	0.00759371	0.00548198	2335/309/1906/5595/2066/8828/3911/10512/7869/8482/2348/3280/157506	13
BP	GO:0048144	fibroblast proliferation	13/1127	80/18862	0.000864689	0.00759371	0.00548198	3479/2335/6277/1499/2495/2950/183/5154/2069/1026/5319/6422/5074	13
BP	GO:0090287	regulation of cellular response to growth factor stimulus	32/1127	296/18862	0.000867035	0.00759371	0.00548198	967/2805/6233/3273/116844/11171/3675/7057/5015/2200/56937/858/10272/55959/183/135228/3491/9315/7448/9353/4681/2201/2719/2348/2625/51232/7316/5654/6422/857/3280/11167	32
BP	GO:0000187	activation of MAPK activity	20/1127	154/18862	0.000869141	0.00759371	0.00548198	5478/6288/6647/3479/6233/7057/7852/6997/727/5595/55765/7001/183/255324/6464/5319/7018/7316/1848/5606	20
BP	GO:1902107	positive regulation of leukocyte differentiation	20/1127	154/18862	0.000869141	0.00759371	0.00548198	2778/537/2547/4192/6659/3146/677/7071/8876/301/5105/558/3725/3123/2353/5196/2625/11221/64332/4323	20
BP	GO:1903708	positive regulation of hemopoiesis	20/1127	154/18862	0.000869141	0.00759371	0.00548198	2778/537/2547/4192/6659/3146/677/7071/8876/301/5105/558/3725/3123/2353/5196/2625/11221/64332/4323	20
BP	GO:0014033	neural crest cell differentiation	14/1127	90/18862	0.000869616	0.00759371	0.00548198	2335/309/1906/5595/2066/8828/3911/10512/7869/8482/2348/6422/3280/157506	14
BP	GO:0046470	phosphatidylcholine metabolic process	14/1127	90/18862	0.000869616	0.00759371	0.00548198	341/824/10809/5320/11145/5444/336/949/57153/2181/5319/10400/337/5920	14
BP	GO:0019229	regulation of vasoconstriction	11/1127	61/18862	0.00087464	0.00761598	0.00549805	2243/2266/2244/1889/1906/183/1956/185/59272/3383/857	11
BP	GO:0008286	insulin receptor signaling pathway	19/1127	143/18862	0.00087625	0.00761598	0.00549805	5919/9296/537/9550/8992/197/64710/5167/858/6464/9971/55023/10458/5166/6599/3481/3484/533/529	19
BP	GO:0042554	superoxide anion generation	8/1127	35/18862	0.000876386	0.00761598	0.00549805	6647/1401/1906/1535/2950/5446/1956/2150	8
BP	GO:0019218	regulation of steroid metabolic process	17/1127	122/18862	0.000938272	0.00812769	0.00586746	6647/341/348/55004/5901/37/336/7108/8644/2264/183/185/9971/1958/476/57678/337	17
BP	GO:0046031	ADP metabolic process	17/1127	122/18862	0.000938272	0.00812769	0.00586746	3939/2597/7167/226/3479/229/5236/2027/5223/5230/2023/204/351/2203/5214/2026/5315	17
BP	GO:0043491	protein kinase B signaling	30/1127	273/18862	0.000952915	0.00821773	0.00593246	3479/57142/10399/118788/79727/7295/708/677/7057/1646/8644/2264/5154/2066/2069/255324/1956/117145/5880/558/391/283120/23533/3320/2876/3688/3481/2625/374/2159	30
BP	GO:0110053	regulation of actin filament organization	30/1127	273/18862	0.000952915	0.00821773	0.00593246	9168/389/375/7114/998/71/832/9948/387/10109/11034/5216/3925/7168/6281/29766/2316/822/3397/4070/10458/9353/10095/2150/2934/6711/6422/3383/274/50853	30
BP	GO:0006417	regulation of translation	42/1127	425/18862	0.00095824	0.00821773	0.00593246	2597/6125/10247/5499/6208/10399/6188/5935/283/6191/79727/6726/7555/23521/4691/9939/6659/6134/708/677/7057/1984/6169/3673/5595/26986/10642/3609/6154/1153/1981/351/1938/1653/48/51714/3315/65981/5315/10644/23654/1968	42
BP	GO:0032799	low-density lipoprotein receptor particle metabolic process	5/1127	14/18862	0.000959291	0.00821773	0.00593246	1173/348/302/1175/5045	5
BP	GO:0032802	low-density lipoprotein particle receptor catabolic process	5/1127	14/18862	0.000959291	0.00821773	0.00593246	1173/348/302/1175/5045	5
BP	GO:0034370	triglyceride-rich lipoprotein particle remodeling	5/1127	14/18862	0.000959291	0.00821773	0.00593246	348/336/345/9971/337	5
BP	GO:0044794	positive regulation by host of viral process	5/1127	14/18862	0.000959291	0.00821773	0.00593246	1072/348/64710/2040/858	5
BP	GO:0014910	regulation of smooth muscle cell migration	13/1127	81/18862	0.000974727	0.00833676	0.00601839	3479/6282/4192/7168/4035/3673/2950/3037/8826/5154/7448/9353/4780	13
BP	GO:0030323	respiratory tube development	21/1127	167/18862	0.000997653	0.00851939	0.00615023	998/5499/5950/3290/3675/3694/3146/5595/10272/5154/1512/3911/83716/6678/1956/2627/5764/2719/3280/157506/4323	21
BP	GO:0002455	humoral immune response mediated by circulating immunoglobulin	20/1127	156/18862	0.00102256	0.00871837	0.00629388	716/725/722/718/735/1401/325/733/729/715/1191/710/10747/731/732/3263/3426/708/727/3123	20
BP	GO:1903409	reactive oxygen species biosynthetic process	17/1127	123/18862	0.00102949	0.00876018	0.00632406	6647/445/1191/6648/4513/1728/1727/1906/1535/55765/6526/283120/3320/1543/3383/857/23576	17
BP	GO:0090151	establishment of protein localization to mitochondrial membrane	10/1127	53/18862	0.00103232	0.00876018	0.00632406	7534/801/808/2810/3308/140823/10971/7529/3320/90427	10
BP	GO:1905517	macrophage migration	10/1127	53/18862	0.00103232	0.00876018	0.00632406	5919/6288/4192/7057/727/5595/3958/57509/84675/4323	10
BP	GO:0000027	ribosomal large subunit assembly	7/1127	28/18862	0.00104159	0.00881119	0.00636089	6125/6175/6122/6147/6135/6134/6169	7
BP	GO:0010039	response to iron ion	7/1127	28/18862	0.00104159	0.00881119	0.00636089	567/595/7031/48/7018/1543/57817	7
BP	GO:0033572	transferrin transport	8/1127	36/18862	0.00106852	0.00901086	0.00650503	9296/537/9550/8992/7037/7018/533/529	8
BP	GO:0045730	respiratory burst	8/1127	36/18862	0.00106852	0.00901086	0.00650503	3929/100133941/5223/1535/7001/2896/5880/11221	8
BP	GO:1901568	fatty acid derivative metabolic process	13/1127	82/18862	0.00109624	0.00923023	0.0066634	3158/38/2180/1579/22949/2182/2181/5066/60481/8529/3248/6576/57834	13
BP	GO:0048863	stem cell differentiation	28/1127	251/18862	0.0011016	0.00926097	0.00668559	2335/79727/309/5693/7520/1906/5595/3313/5690/2066/8828/3911/2627/4070/10512/3875/5764/7869/8482/2348/2625/6422/4780/3280/157506/4072/132299/2	28
BP	GO:0000028	ribosomal small subunit assembly	6/1127	21/18862	0.00111974	0.00939887	0.00678514	6209/6208/6193/3921/7520/6169	6
BP	GO:0046887	positive regulation of hormone secretion	17/1127	124/18862	0.00112813	0.00945465	0.0068254	2243/2266/2244/5950/55450/6659/4035/25874/1906/2182/8431/1956/9971/8673/3123/51714/222546	17
BP	GO:0009135	purine nucleoside diphosphate metabolic process	18/1127	135/18862	0.00113599	0.00949114	0.00685175	3939/2597/7167/226/3479/229/5236/2027/5223/5230/2023/2987/204/351/2203/5214/2026/5315	18
BP	GO:0009179	purine ribonucleoside diphosphate metabolic process	18/1127	135/18862	0.00113599	0.00949114	0.00685175	3939/2597/7167/226/3479/229/5236/2027/5223/5230/2023/2987/204/351/2203/5214/2026/5315	18
BP	GO:0070372	regulation of ERK1 and ERK2 cascade	32/1127	301/18862	0.00114663	0.00956528	0.00690527	7534/2243/2266/2244/537/348/2335/55450/5320/3146/4035/152007/5595/2264/2950/255743/5154/2066/4835/3491/1956/6464/351/7430/3123/2150/8482/11221/1848/3383/100506013/6364	32
BP	GO:0006936	muscle contraction	36/1127	352/18862	0.00117759	0.00980839	0.00708077	7170/4637/226/801/6647/103910/805/808/309/7168/7852/2023/1906/3673/29766/2316/3728/481/55959/6926/1938/476/6781/59272/1832/7169/2934/10398/7171/857/7094/274/3764/100507537/5606/444	36
BP	GO:0006096	glycolytic process	16/1127	114/18862	0.00121106	0.0100717	0.00727085	3939/2597/7167/226/3479/229/5236/2027/5223/5230/2023/351/2203/5214/2026/5315	16
BP	GO:0032092	positive regulation of protein binding	13/1127	83/18862	0.00123014	0.010199	0.00736279	567/348/2280/6135/5901/4035/302/7448/351/5515/65981/10267/857	13
BP	GO:0048864	stem cell development	13/1127	83/18862	0.00123014	0.010199	0.00736279	2335/309/1906/5595/2066/8828/3911/10512/7869/8482/2348/3280/157506	13
BP	GO:0045927	positive regulation of growth	28/1127	253/18862	0.00124325	0.0102778	0.00741965	3249/3020/998/3021/3479/2335/10591/7852/4035/1906/2810/2066/1956/1382/2627/1981/57678/7430/10409/3481/10551/8482/58191/6422/3484/4323/8766/57817	28
BP	GO:0010720	positive regulation of cell development	31/1127	290/18862	0.00124344	0.0102778	0.00741965	2243/2266/998/2244/537/387/10109/5176/2335/1499/5034/4192/7520/708/7852/4035/6281/2316/3037/1382/9353/5764/3572/8482/65981/23363/3280/55679/23654/274/8766	31
BP	GO:0002504	antigen processing and presentation of peptide or polysaccharide antigen via MHC class II	15/1127	104/18862	0.00128516	0.0106065	0.00765695	375/1173/832/10540/7057/1510/1175/1509/22872/1514/3127/3835/3123/1639/10053	15
BP	GO:0033120	positive regulation of RNA splicing	8/1127	37/18862	0.00129286	0.0106376	0.00767938	5935/9588/4691/27316/1153/283375/5430/54407	8
BP	GO:0048713	regulation of oligodendrocyte differentiation	8/1127	37/18862	0.00129286	0.0106376	0.00767938	9948/4192/7852/26022/5764/11221/27242/3280	8
BP	GO:1900027	regulation of ruffle assembly	7/1127	29/18862	0.00130301	0.0107048	0.00772792	5216/4070/391/64787/79574/3383/857	7
BP	GO:0009306	protein secretion	37/1127	367/18862	0.00131266	0.0107678	0.00777337	5478/2243/375/2266/2244/6288/10890/3479/348/5950/283/55450/6659/3418/4035/25874/2182/19/301/3993/284119/8431/1956/9971/8754/5066/7430/3123/5319/1803/2150/27063/51714/4074/3783/6422/222546	37
BP	GO:0006757	ATP generation from ADP	16/1127	115/18862	0.00133051	0.0108977	0.00786714	3939/2597/7167/226/3479/229/5236/2027/5223/5230/2023/351/2203/5214/2026/5315	16
BP	GO:0035966	response to topologically incorrect protein	24/1127	206/18862	0.00134029	0.0109612	0.00791301	10399/1191/37/7057/871/7009/3336/595/4000/3313/3308/22872/6464/3320/1639/1047/10551/3329/3315/26353/2161/4780/3484/7094	24
BP	GO:0050764	regulation of phagocytosis	14/1127	94/18862	0.00134364	0.010972	0.00792083	718/6647/10399/197/3146/336/4035/1535/3673/949/3685/4240/2150/3561	14
BP	GO:0006000	fructose metabolic process	5/1127	15/18862	0.00136856	0.0110919	0.00800734	226/229/216/2203/231	5
BP	GO:0009404	toxin metabolic process	5/1127	15/18862	0.00136856	0.0110919	0.00800734	22977/5066/1543/4780/1644	5
BP	GO:0035635	entry of bacterium into host cell	5/1127	15/18862	0.00136856	0.0110919	0.00800734	1499/3685/1500/3853/857	5
BP	GO:0042448	progesterone metabolic process	5/1127	15/18862	0.00136856	0.0110919	0.00800734	1645/1646/8644/1109/1958	5
BP	GO:0046500	S-adenosylmethionine metabolic process	5/1127	15/18862	0.00136856	0.0110919	0.00800734	27232/23743/4144/10400/23382	5
BP	GO:0014031	mesenchymal cell development	13/1127	84/18862	0.00137738	0.0111467	0.00804693	2335/309/1906/5595/2066/8828/3911/10512/7869/8482/2348/3280/157506	13
BP	GO:0001501	skeletal system development	46/1127	486/18862	0.00138375	0.0111623	0.00805818	2778/537/3479/5052/387/5950/1499/3950/6137/309/197/4192/6659/3694/5358/6169/871/9060/1906/2200/5595/649/302/3037/55959/6926/6694/3491/1462/2202/9061/6781/2201/7045/1044/3481/25987/2767/3074/6422/7076/157506/79705/4060/4323/4094	46
BP	GO:0042326	negative regulation of phosphorylation	40/1127	407/18862	0.00138661	0.0111623	0.00805818	5478/801/10399/348/805/11171/808/55450/197/11261/29103/2810/2950/5167/56937/9052/1029/183/135228/7529/1981/9353/6690/5621/2203/5570/1026/5515/143941/1647/3315/11221/10935/1848/23530/6422/857/79705/5573/22943	40
BP	GO:0001836	release of cytochrome c from mitochondria	10/1127	55/18862	0.00138973	0.0111623	0.00805818	3479/1191/27069/664/6648/2810/598/3725/2876/90427	10
BP	GO:0006120	mitochondrial electron transport, NADH to ubiquinone	10/1127	55/18862	0.00138973	0.0111623	0.00805818	4541/4538/4725/4539/4537/4706/29103/4540/4535/4720	10
BP	GO:0050798	activated T cell proliferation	9/1127	46/18862	0.00139374	0.0111623	0.00805818	3479/6188/100133941/3146/57678/5621/3481/3485/5573	9
BP	GO:0050919	negative chemotaxis	9/1127	46/18862	0.00139374	0.0111623	0.00805818	387/3685/5154/8828/10512/9353/1803/7869/8482	9
BP	GO:0070849	response to epidermal growth factor	9/1127	46/18862	0.00139374	0.0111623	0.00805818	1915/677/6997/5595/2950/8826/3397/2066/1956	9
BP	GO:0010288	response to lead ion	6/1127	22/18862	0.00146254	0.0116131	0.00838362	5499/847/6678/351/5515/9076	6
BP	GO:0030277	maintenance of gastrointestinal epithelium	6/1127	22/18862	0.00146254	0.0116131	0.00838362	5950/11171/55765/7031/56667/12	6
BP	GO:1901685	glutathione derivative metabolic process	6/1127	22/18862	0.00146254	0.0116131	0.00838362	4257/2950/2938/2948/2939/2941	6
BP	GO:1901687	glutathione derivative biosynthetic process	6/1127	22/18862	0.00146254	0.0116131	0.00838362	4257/2950/2938/2948/2939/2941	6
BP	GO:1901798	positive regulation of signal transduction by p53 class mediator	6/1127	22/18862	0.00146254	0.0116131	0.00838362	1655/9349/6135/6201/6154/27063	6
BP	GO:0009185	ribonucleoside diphosphate metabolic process	18/1127	138/18862	0.00146504	0.0116131	0.00838362	3939/2597/7167/226/3479/229/5236/2027/5223/5230/2023/2987/204/351/2203/5214/2026/5315	18
BP	GO:0072006	nephron development	18/1127	138/18862	0.00146504	0.0116131	0.00838362	1499/100133941/3675/8842/255743/55959/8826/183/3911/8710/1958/4070/3913/10409/2719/2625/3280/793	18
BP	GO:0034381	plasma lipoprotein particle clearance	11/1127	65/18862	0.00150578	0.0119011	0.00859155	1173/341/348/3190/336/949/345/302/1175/9971/81693	11
BP	GO:0071479	cellular response to ionizing radiation	11/1127	65/18862	0.00150578	0.0119011	0.00859155	2547/64710/7520/3694/6154/1958/1026/1647/2625/6422/57817	11
BP	GO:0032535	regulation of cellular component size	37/1127	370/18862	0.00151688	0.011954	0.00862968	9168/114908/375/7114/1173/5499/832/57142/9948/348/387/10109/2335/11034/5216/4035/10083/1906/29766/822/1382/10458/10512/9353/10095/7430/7869/2150/2934/8482/6711/3783/3383/54825/274/8766/50853	37
BP	GO:1902903	regulation of supramolecular fiber organization	37/1127	370/18862	0.00151688	0.011954	0.00862968	9168/389/375/7114/998/71/832/9948/6188/348/387/10109/1191/11034/5216/3925/7168/1906/6281/29766/2316/822/3397/351/4070/10458/9353/10095/2876/1639/2150/2934/6711/6422/3383/274/50853	37
BP	GO:0042176	regulation of protein catabolic process	38/1127	383/18862	0.00152126	0.0119711	0.00864204	725/722/6125/10399/348/1915/1191/9349/10134/7341/6135/6201/4035/6923/2316/302/1471/1956/8754/7430/252839/7077/79589/3320/2876/1075/55353/2719/6599/143941/5476/5045/4780/857/7076/23192/4953/57817	38
BP	GO:0051235	maintenance of location	33/1127	319/18862	0.00153067	0.0120277	0.0086829	9168/2512/718/7114/801/1401/348/805/2280/7295/213/2495/808/309/123/10945/11014/2200/949/2316/3685/5167/19/7529/440335/3934/4681/2201/2934/3074/857/57104/27329	33
BP	GO:0019915	lipid storage	13/1127	85/18862	0.00153898	0.0120754	0.00871735	718/1401/348/123/949/3685/5167/19/440335/3074/857/57104/27329	13
BP	GO:0042274	ribosomal small subunit biogenesis	12/1127	75/18862	0.00154926	0.0121334	0.00875921	6194/6209/6208/6193/6201/3921/6202/6229/7520/6227/6169/10171	12
BP	GO:0008210	estrogen metabolic process	8/1127	38/18862	0.00155309	0.0121334	0.00875921	7363/1558/1577/1551/1543/1559/3283/7364	8
BP	GO:0048246	macrophage chemotaxis	8/1127	38/18862	0.00155309	0.0121334	0.00875921	5919/6288/4192/7057/727/5595/3958/57509	8
BP	GO:0048259	regulation of receptor-mediated endocytosis	15/1127	106/18862	0.00156293	0.0121881	0.00879871	967/567/718/375/341/1191/3190/84058/345/302/3685/7448/7018/100506013/22943	15
BP	GO:0061138	morphogenesis of a branching epithelium	21/1127	173/18862	0.0015646	0.0121881	0.00879871	5499/1499/4192/1906/7052/255743/183/5154/6926/1512/1282/6768/3911/4070/10512/9353/10653/2719/6422/157506/4323	21
BP	GO:0006986	response to unfolded protein	22/1127	185/18862	0.00160157	0.0124147	0.0089623	10399/37/7057/871/7009/3336/595/4000/3313/3308/22872/6464/3320/1639/1047/10551/3329/3315/26353/4780/3484/7094	22
BP	GO:0019884	antigen processing and presentation of exogenous antigen	22/1127	185/18862	0.00160157	0.0124147	0.0089623	567/375/1173/832/10540/5693/1535/3685/1510/5690/1175/1509/22872/1514/3127/3835/3106/8673/3123/1639/3140/10053	22
BP	GO:0007007	inner mitochondrial membrane organization	10/1127	56/18862	0.00160286	0.0124147	0.0089623	506/27069/518/4508/516/9551/522/3313/140823/498	10
BP	GO:0060135	maternal process involved in female pregnancy	10/1127	56/18862	0.00160286	0.0124147	0.0089623	682/3675/5595/3726/5066/5764/6781/10935/231/23780	10
BP	GO:0043903	regulation of biological process involved in symbiotic interaction	23/1127	197/18862	0.00162383	0.0125591	0.00906657	5478/10581/325/10410/5441/5034/7852/684/26986/3956/3685/858/3609/3853/558/3123/81603/2150/2934/5430/5434/857/10346	23
BP	GO:0034332	adherens junction organization	11/1127	66/18862	0.00171125	0.0132152	0.00954018	60/998/283/1499/55765/3728/1500/1015/1832/1004/81607	11
BP	GO:0001657	ureteric bud development	13/1127	86/18862	0.00171597	0.0132152	0.00954018	847/255743/183/3911/4070/9353/10409/2719/6382/2625/6422/3280/793	13
BP	GO:0007589	body fluid secretion	13/1127	86/18862	0.00171597	0.0132152	0.00954018	4513/462/1314/2806/1906/595/2066/5066/1036/8673/10551/3783/857	13
BP	GO:0071356	cellular response to tumor necrosis factor	31/1127	296/18862	0.00172374	0.0132561	0.00956974	7114/10399/6188/445/5693/4055/677/7057/6997/1906/5595/2950/255743/3037/5690/9971/5105/3875/1244/3856/51330/2150/27063/2625/27242/9076/6422/4780/3383/6364/57817	31
BP	GO:0070374	positive regulation of ERK1 and ERK2 cascade	24/1127	210/18862	0.00174229	0.0133798	0.00965899	2243/2266/2244/537/348/5320/3146/4035/152007/5595/2264/255743/5154/2066/4835/1956/6464/351/3123/2150/8482/3383/100506013/6364	24
BP	GO:0043534	blood vessel endothelial cell migration	21/1127	175/18862	0.00180629	0.0138516	0.00999961	7114/506/348/387/3273/4627/3146/7057/6997/1948/949/3728/301/3397/9353/2876/1647/498/3315/4780/5606	21
BP	GO:0003012	muscle system process	43/1127	453/18862	0.00184497	0.0141282	0.0101993	7170/4637/226/801/6647/103910/3479/805/808/309/7168/7852/2023/1906/1535/3673/29766/2316/3728/481/4000/55959/183/6926/2627/1938/476/6781/59272/3572/1832/7169/2934/10398/7171/857/7094/274/3764/100507537/57817/5606/444	43
BP	GO:0090207	regulation of triglyceride metabolic process	8/1127	39/18862	0.00185312	0.0141706	0.0102299	718/348/949/345/7069/13/337/57104	8
BP	GO:0072503	cellular divalent inorganic cation homeostasis	45/1127	480/18862	0.00187136	0.0142178	0.0102639	2805/4502/6288/801/348/4501/664/3827/4499/805/4495/2280/4493/10134/100133941/4494/808/309/4496/887/3146/7852/4035/7009/1906/2782/481/7052/3685/858/185/351/283375/79054/5621/10518/6781/5319/2150/7178/51714/3074/64116/857/793	45
BP	GO:0006958	complement activation, classical pathway	18/1127	141/18862	0.00187144	0.0142178	0.0102639	716/725/722/718/735/1401/325/733/729/715/1191/710/10747/731/732/3426/708/727	18
BP	GO:0005980	glycogen catabolic process	6/1127	23/18862	0.00187978	0.0142178	0.0102639	801/5499/5236/3146/2538/5836	6
BP	GO:0006541	glutamine metabolic process	6/1127	23/18862	0.00187978	0.0142178	0.0102639	1373/92292/9971/1503/27165/2752	6
BP	GO:0009068	aspartate family amino acid catabolic process	6/1127	23/18862	0.00187978	0.0142178	0.0102639	2805/10247/1428/2806/80150/10993	6
BP	GO:0048026	positive regulation of mRNA splicing, via spliceosome	6/1127	23/18862	0.00187978	0.0142178	0.0102639	5935/9588/4691/27316/1153/283375	6
BP	GO:0019372	lipoxygenase pathway	5/1127	16/18862	0.00189343	0.0142178	0.0102639	5445/5444/5446/2876/3248	5
BP	GO:0030033	microvillus assembly	5/1127	16/18862	0.00189343	0.0142178	0.0102639	6624/53827/7430/688/51765	5
BP	GO:0034380	high-density lipoprotein particle assembly	5/1127	16/18862	0.00189343	0.0142178	0.0102639	348/336/649/19/337	5
BP	GO:0034384	high-density lipoprotein particle clearance	5/1127	16/18862	0.00189343	0.0142178	0.0102639	348/336/949/345/81693	5
BP	GO:0044764	multi-organism cellular process	5/1127	16/18862	0.00189343	0.0142178	0.0102639	5478/7852/858/1514/857	5
BP	GO:0061684	chaperone-mediated autophagy	5/1127	16/18862	0.00189343	0.0142178	0.0102639	1915/1191/3920/3320/5476	5
BP	GO:1901569	fatty acid derivative catabolic process	5/1127	16/18862	0.00189343	0.0142178	0.0102639	38/1579/8529/3248/57834	5
BP	GO:0006766	vitamin metabolic process	17/1127	130/18862	0.00190412	0.0142591	0.0102938	2638/6515/55350/316/54657/1727/8644/5167/8876/873/8875/81693/8529/2348/1543/57834/157506	17
BP	GO:0002790	peptide secretion	39/1127	401/18862	0.00190905	0.0142591	0.0102938	5478/2243/5861/375/2266/2244/6288/10890/3479/348/5950/283/55450/6659/3418/4035/25874/1906/2182/19/301/3993/284119/8431/1956/9971/8754/5066/7430/3123/5319/1803/2150/27063/51714/4074/3783/6422/222546	39
BP	GO:0072163	mesonephric epithelium development	13/1127	87/18862	0.00190947	0.0142591	0.0102938	847/255743/183/3911/4070/9353/10409/2719/6382/2625/6422/3280/793	13
BP	GO:0072164	mesonephric tubule development	13/1127	87/18862	0.00190947	0.0142591	0.0102938	847/255743/183/3911/4070/9353/10409/2719/6382/2625/6422/3280/793	13
BP	GO:0001933	negative regulation of protein phosphorylation	36/1127	362/18862	0.00191699	0.0142955	0.0103201	5478/801/10399/348/805/11171/808/55450/11261/2810/2950/5167/56937/9052/1029/183/135228/7529/1981/9353/6690/5621/5570/1026/5515/143941/1647/3315/11221/1848/23530/6422/857/79705/5573/22943	36
BP	GO:1901607	alpha-amino acid biosynthetic process	11/1127	67/18862	0.00193904	0.0144401	0.0104245	2805/445/1373/5009/5352/2806/189/23743/27165/2752/10993	11
BP	GO:0022618	ribonucleoprotein complex assembly	25/1127	224/18862	0.00196569	0.0145795	0.0105251	6125/6175/6628/6209/6208/6633/6122/6147/6635/6135/6193/3921/11171/23521/7520/6134/51386/6169/25804/27316/6426/23451/1653/3320/1968	25
BP	GO:0044788	modulation by host of viral process	7/1127	31/18862	0.00197749	0.0145795	0.0105251	1072/1401/325/348/64710/2040/858	7
BP	GO:0007163	establishment or maintenance of cell polarity	24/1127	212/18862	0.00197927	0.0145795	0.0105251	389/60/998/10890/10399/9948/387/667/4627/6624/4000/3993/22836/2011/5880/391/3320/3688/10653/1639/2934/2625/390/3280	24
BP	GO:0050870	positive regulation of T cell activation	24/1127	212/18862	0.00197927	0.0145795	0.0105251	998/3479/6188/100133941/4192/6659/3146/3956/8876/301/5105/7037/57678/3572/3123/1803/3481/2625/3329/11221/3485/857/3280/64332	24
BP	GO:0002424	T cell mediated immune response to tumor cell	4/1127	10/18862	0.00199007	0.0145795	0.0105251	3146/3123/3140/3329	4
BP	GO:0030388	fructose 1,6-bisphosphate metabolic process	4/1127	10/18862	0.00199007	0.0145795	0.0105251	226/229/2203/5214	4
BP	GO:0033483	gas homeostasis	4/1127	10/18862	0.00199007	0.0145795	0.0105251	6648/2950/23530/857	4
BP	GO:0046487	glyoxylate metabolic process	4/1127	10/18862	0.00199007	0.0145795	0.0105251	3417/3418/2806/189	4
BP	GO:0051342	regulation of cyclic-nucleotide phosphodiesterase activity	4/1127	10/18862	0.00199007	0.0145795	0.0105251	801/10399/805/808	4
BP	GO:0071073	positive regulation of phospholipid biosynthetic process	4/1127	10/18862	0.00199007	0.0145795	0.0105251	824/11261/2181/9971	4
BP	GO:0150172	regulation of phosphatidylcholine metabolic process	4/1127	10/18862	0.00199007	0.0145795	0.0105251	341/824/949/2181	4
BP	GO:1900426	positive regulation of defense response to bacterium	4/1127	10/18862	0.00199007	0.0145795	0.0105251	1535/2896/5225/2150	4
BP	GO:0015711	organic anion transport	37/1127	376/18862	0.00200967	0.0147032	0.0106144	10550/366/10599/10786/5660/1645/347734/5244/5320/51660/25874/1906/9536/1109/1579/301/3993/8431/9056/771/1836/9971/1244/768/284111/59272/8529/3688/5319/6520/6554/2348/6576/64116/23428/27165/54407	37
BP	GO:0031341	regulation of cell killing	14/1127	98/18862	0.00201651	0.0147333	0.0106361	3075/567/563/3916/966/5272/3853/598/3106/3123/1773/2150/3140/3383	14
BP	GO:0009914	hormone transport	32/1127	312/18862	0.00205073	0.0149631	0.010802	2243/5861/2266/2244/2778/5950/55450/6906/1428/7276/6659/4035/25874/1906/2182/301/183/6926/8431/1956/185/140606/9971/1244/8673/3123/1803/51714/2625/6422/23428/222546	32
BP	GO:0002478	antigen processing and presentation of exogenous peptide antigen	21/1127	177/18862	0.00207898	0.0151285	0.0109214	567/375/1173/832/10540/5693/1535/3685/1510/5690/1175/1509/22872/1514/3127/3835/3106/8673/3123/1639/10053	21
BP	GO:0071346	cellular response to interferon-gamma	21/1127	177/18862	0.00207898	0.0151285	0.0109214	567/2597/998/4502/445/3263/7341/23521/6997/1906/3127/3106/7791/3123/81603/2934/9076/9111/3383/6364/10346	21
BP	GO:0050730	regulation of peptidyl-tyrosine phosphorylation	28/1127	262/18862	0.00209326	0.015212	0.0109817	3479/10399/3273/3263/100133941/6997/9052/8826/183/5154/2066/2069/255324/1956/6464/7448/351/6690/5621/5515/3572/3481/374/6422/3383/857/3280/79705	28
BP	GO:0014909	smooth muscle cell migration	13/1127	88/18862	0.0021206	0.01539	0.0111102	3479/6282/4192/7168/4035/3673/2950/3037/8826/5154/7448/9353/4780	13
BP	GO:0032272	negative regulation of protein polymerization	12/1127	78/18862	0.0021858	0.0158419	0.0114364	9168/7114/832/7417/5216/3925/29766/822/9353/2934/6711/50853	12
BP	GO:0045685	regulation of glial cell differentiation	11/1127	68/18862	0.00219089	0.0158576	0.0114478	9948/79727/4192/7852/26022/5764/3572/11221/27242/3280/274	11
BP	GO:0019886	antigen processing and presentation of exogenous peptide antigen via MHC class II	14/1127	99/18862	0.00222248	0.0160647	0.0115973	375/1173/832/10540/1510/1175/1509/22872/1514/3127/3835/3123/1639/10053	14
BP	GO:0006165	nucleoside diphosphate phosphorylation	17/1127	132/18862	0.00224625	0.0161933	0.0116901	3939/2597/7167/226/3479/229/5236/2027/5223/5230/2023/4833/351/2203/5214/2026/5315	17
BP	GO:0010595	positive regulation of endothelial cell migration	17/1127	132/18862	0.00224625	0.0161933	0.0116901	7114/506/3146/7057/6997/1906/949/301/183/8828/6678/2896/2625/498/3315/4780/5606	17
BP	GO:0009746	response to hexose	22/1127	190/18862	0.00224985	0.0161977	0.0116933	3939/1361/10399/5176/79727/55450/6659/7057/336/4035/25874/3956/8431/9971/1958/5105/3875/57678/3123/51714/3383/222546	22
BP	GO:0060284	regulation of cell development	45/1127	485/18862	0.00228728	0.0164414	0.0118692	567/2243/2266/998/2244/537/3479/57142/387/10109/5176/2335/1499/79727/5034/4192/7520/3418/708/7852/4035/2200/6281/2316/9921/3037/3397/1382/2896/4070/10512/26022/9353/5764/3572/7869/8482/11221/65981/23363/3280/55679/23654/274/8766	45
BP	GO:0050863	regulation of T cell activation	33/1127	327/18862	0.00228977	0.0164414	0.0118692	998/6647/3479/6188/2267/100133941/4192/6659/3146/7001/3956/8876/301/3958/5105/7037/5880/57678/5621/3572/3123/1803/3481/2625/3329/11221/27242/3485/857/3280/5573/64332/5074	33
BP	GO:0071772	response to BMP	20/1127	167/18862	0.00234696	0.0168074	0.0121335	1655/3675/2200/5595/10272/4093/3491/2627/1958/148738/283375/4681/10653/2719/2625/51232/5654/6422/3280/11167	20
BP	GO:0071773	cellular response to BMP stimulus	20/1127	167/18862	0.00234696	0.0168074	0.0121335	1655/3675/2200/5595/10272/4093/3491/2627/1958/148738/283375/4681/10653/2719/2625/51232/5654/6422/3280/11167	20
BP	GO:0046849	bone remodeling	13/1127	89/18862	0.00235056	0.016811	0.0121361	537/4192/6694/1956/5166/7037/5880/3953/5764/7018/6422/79705/57817	13
BP	GO:0014074	response to purine-containing compound	18/1127	144/18862	0.00236888	0.0169196	0.0122145	682/3939/6647/445/366/1373/677/6678/351/189/5105/1036/3725/10518/7430/6781/2353/6382	18
BP	GO:0009251	glucan catabolic process	6/1127	24/18862	0.00238119	0.0169628	0.0122456	801/5499/5236/3146/2538/5836	6
BP	GO:0086064	cell communication by electrical coupling involved in cardiac conduction	6/1127	24/18862	0.00238119	0.0169628	0.0122456	801/805/808/481/476/857	6
BP	GO:0010743	regulation of macrophage derived foam cell differentiation	7/1127	32/18862	0.00240255	0.0170467	0.0123062	1401/5320/3685/19/183/185/5196	7
BP	GO:0051385	response to mineralocorticoid	7/1127	32/18862	0.00240255	0.0170467	0.0123062	801/808/1906/595/1026/2353/3283	7
BP	GO:0090022	regulation of neutrophil chemotaxis	7/1127	32/18862	0.00240255	0.0170467	0.0123062	3929/4192/708/1906/5880/9353/1803	7
BP	GO:0030042	actin filament depolymerization	10/1127	59/18862	0.00240556	0.0170467	0.0123062	1072/832/9948/11034/29766/822/2150/2934/6711/50853	10
BP	GO:0022613	ribonucleoprotein complex biogenesis	44/1127	473/18862	0.0024218	0.0171394	0.0123731	6125/6175/6628/6194/6129/6209/6208/6633/4736/6122/11224/6147/6635/6135/6193/6201/5901/3921/11171/6202/23521/6165/6229/7520/6134/2971/708/6227/51386/6169/6155/130916/9045/25804/27316/6187/6426/6154/23451/1653/3320/2752/10171/1968	44
BP	GO:0046939	nucleotide phosphorylation	17/1127	133/18862	0.00243571	0.0171799	0.0124023	3939/2597/7167/226/3479/229/5236/2027/5223/5230/2023/4833/351/2203/5214/2026/5315	17
BP	GO:0050729	positive regulation of inflammatory response	17/1127	133/18862	0.00243571	0.0171799	0.0124023	718/3929/4192/5320/3673/7052/183/1956/283131/185/2896/351/8673/1075/3572/9111/64332	17
BP	GO:0030104	water homeostasis	12/1127	79/18862	0.00244022	0.0171799	0.0124023	366/3925/51599/2810/1579/3037/8529/9076/231/1364/5573/8766	12
BP	GO:0042310	vasoconstriction	12/1127	79/18862	0.00244022	0.0171799	0.0124023	2243/2266/2244/1401/1889/1906/183/1956/185/59272/3383/857	12
BP	GO:0009132	nucleoside diphosphate metabolic process	19/1127	156/18862	0.00245839	0.0172854	0.0124785	3939/2597/7167/226/3479/229/5236/2027/5223/5230/2023/2987/204/4833/351/2203/5214/2026/5315	19
BP	GO:0043112	receptor metabolic process	20/1127	168/18862	0.0025185	0.017685	0.012767	967/375/1173/348/55004/823/1889/4035/84058/302/1175/7037/7430/55111/3688/5045/10267/857/100506013/22943	20
BP	GO:0010715	regulation of extracellular matrix disassembly	5/1127	17/18862	0.00255158	0.017762	0.0128226	6624/4035/2264/1471/1803	5
BP	GO:0033194	response to hydroperoxide	5/1127	17/18862	0.00255158	0.017762	0.0128226	4257/4535/2878/2876/337	5
BP	GO:0034374	low-density lipoprotein particle remodeling	5/1127	17/18862	0.00255158	0.017762	0.0128226	348/5320/336/183/185	5
BP	GO:0050665	hydrogen peroxide biosynthetic process	5/1127	17/18862	0.00255158	0.017762	0.0128226	6647/6648/4513/1535/1543	5
BP	GO:0090201	negative regulation of release of cytochrome c from mitochondria	5/1127	17/18862	0.00255158	0.017762	0.0128226	3479/1191/27069/598/2876	5
BP	GO:0031345	negative regulation of cell projection organization	21/1127	180/18862	0.00255293	0.017762	0.0128226	567/832/57142/348/387/3273/3675/4035/1948/2316/1809/3956/3397/4070/10512/9353/5621/7869/25987/8482/81618	21
BP	GO:0046460	neutral lipid biosynthetic process	9/1127	50/18862	0.00255899	0.017762	0.0128226	718/283/2180/949/2182/7069/5105/57678/57104	9
BP	GO:0046463	acylglycerol biosynthetic process	9/1127	50/18862	0.00255899	0.017762	0.0128226	718/283/2180/949/2182/7069/5105/57678/57104	9
BP	GO:0048260	positive regulation of receptor-mediated endocytosis	9/1127	50/18862	0.00255899	0.017762	0.0128226	967/567/718/1191/3190/302/7448/7018/100506013	9
BP	GO:0032689	negative regulation of interferon-gamma production	8/1127	41/18862	0.00258915	0.0179254	0.0129405	708/3146/9971/558/5621/3123/114770/2625	8
BP	GO:1902042	negative regulation of extrinsic apoptotic signaling pathway via death domain receptors	8/1127	41/18862	0.00258915	0.0179254	0.0129405	2243/2266/2244/598/8795/2876/3383/64114	8
BP	GO:0003073	regulation of systemic arterial blood pressure	13/1127	90/18862	0.00260059	0.0179816	0.0129811	5919/6648/55450/7168/1889/1906/1579/183/185/59272/8529/2150/23576	13
BP	GO:0002224	toll-like receptor signaling pathway	19/1127	157/18862	0.00264437	0.018261	0.0131828	2243/2266/2244/57142/6233/3929/929/118788/3146/1535/1508/9971/1514/2150/7316/3329/57402/9111/857	19
BP	GO:0014812	muscle cell migration	14/1127	101/18862	0.00268668	0.0185295	0.0133766	3479/6282/4192/7168/4035/3673/2950/3037/8826/301/5154/7448/9353/4780	14
BP	GO:1990266	neutrophil migration	16/1127	123/18862	0.00269329	0.0185515	0.0133925	682/5478/6288/9948/3929/4192/708/1906/3958/5880/9353/391/5319/1803/5196/6364	16
BP	GO:0048857	neural nucleus development	10/1127	60/18862	0.00273524	0.0188165	0.0135838	60/998/801/387/805/808/522/1152/10971/10409	10
BP	GO:0060048	cardiac muscle contraction	17/1127	135/18862	0.00285474	0.0196137	0.0141593	801/805/808/7168/7852/2316/3728/481/476/6781/59272/1832/2934/857/274/3764/5606	17
BP	GO:0001823	mesonephros development	13/1127	91/18862	0.00287197	0.019707	0.0142267	847/255743/183/3911/4070/9353/10409/2719/6382/2625/6422/3280/793	13
BP	GO:0006536	glutamate metabolic process	7/1127	33/18862	0.00289459	0.019812	0.0143025	2805/144193/2806/9971/6898/27165/2752	7
BP	GO:0042759	long-chain fatty acid biosynthetic process	7/1127	33/18862	0.00289459	0.019812	0.0143025	1571/2950/1558/2948/3248/1543/1559	7
BP	GO:0043123	positive regulation of I-kappaB kinase/NF-kappaB signaling	21/1127	182/18862	0.00291702	0.0198946	0.0143621	389/387/9516/2280/347734/4055/684/55765/2316/57153/3956/7052/6284/7037/8795/1653/3123/81603/2150/51523/10346	21
BP	GO:0046850	regulation of bone remodeling	9/1127	51/18862	0.0029458	0.0198946	0.0143621	537/4192/1956/5166/7037/3953/7018/6422/57817	9
BP	GO:0044264	cellular polysaccharide metabolic process	14/1127	102/18862	0.00294704	0.0198946	0.0143621	801/5499/3479/5236/3146/5167/2538/2632/3037/3953/27232/3572/3481/5836	14
BP	GO:0033119	negative regulation of RNA splicing	6/1127	25/18862	0.00297685	0.0198946	0.0143621	6207/3190/3181/708/7009/27316	6
BP	GO:0034035	purine ribonucleoside bisphosphate metabolic process	6/1127	25/18862	0.00297685	0.0198946	0.0143621	347734/9060/6822/5167/1836/9061	6
BP	GO:0035902	response to immobilization stress	6/1127	25/18862	0.00297685	0.0198946	0.0143621	2805/6648/7031/3176/2353/1543	6
BP	GO:0042737	drug catabolic process	6/1127	25/18862	0.00297685	0.0198946	0.0143621	1571/1562/1558/1577/1555/1559	6
BP	GO:0044247	cellular polysaccharide catabolic process	6/1127	25/18862	0.00297685	0.0198946	0.0143621	801/5499/5236/3146/2538/5836	6
BP	GO:0050427	3'-phosphoadenosine 5'-phosphosulfate metabolic process	6/1127	25/18862	0.00297685	0.0198946	0.0143621	347734/9060/6822/5167/1836/9061	6
BP	GO:1990000	amyloid fibril formation	6/1127	25/18862	0.00297685	0.0198946	0.0143621	567/348/1191/2280/351/2934	6
BP	GO:0048762	mesenchymal cell differentiation	25/1127	231/18862	0.00297989	0.0198946	0.0143621	3249/57142/2335/1655/1499/11171/309/4192/1906/152007/5595/2316/3037/2066/8828/3911/10512/5515/7869/8482/2348/2625/6422/3280/157506	25
BP	GO:0071826	ribonucleoprotein complex subunit organization	25/1127	231/18862	0.00297989	0.0198946	0.0143621	6125/6175/6628/6209/6208/6633/6122/6147/6635/6135/6193/3921/11171/23521/7520/6134/51386/6169/25804/27316/6426/23451/1653/3320/1968	25
BP	GO:0001765	membrane raft assembly	4/1127	11/18862	0.00298014	0.0198946	0.0143621	6281/302/858/857	4
BP	GO:0008228	opsonization	4/1127	11/18862	0.00298014	0.0198946	0.0143621	725/722/1401/3929	4
BP	GO:0010269	response to selenium ion	4/1127	11/18862	0.00298014	0.0198946	0.0143621	6648/140606/2876/6415	4
BP	GO:0048680	positive regulation of axon regeneration	4/1127	11/18862	0.00298014	0.0198946	0.0143621	4035/2316/2896/5764	4
BP	GO:0061307	cardiac neural crest cell differentiation involved in heart development	4/1127	11/18862	0.00298014	0.0198946	0.0143621	5595/10512/2348/3280	4
BP	GO:0061308	cardiac neural crest cell development involved in heart development	4/1127	11/18862	0.00298014	0.0198946	0.0143621	5595/10512/2348/3280	4
BP	GO:0071472	cellular response to salt stress	4/1127	11/18862	0.00298014	0.0198946	0.0143621	2547/7520/677/231	4
BP	GO:1901533	negative regulation of hematopoietic progenitor cell differentiation	4/1127	11/18862	0.00298014	0.0198946	0.0143621	3313/4780/3280/132299	4
BP	GO:0042254	ribosome biogenesis	31/1127	307/18862	0.00302723	0.0201538	0.0145492	6125/6175/6194/6129/6209/6208/4736/6122/11224/6147/6135/6193/6201/5901/3921/6202/6165/6229/7520/6134/2971/708/6227/6169/6155/130916/9045/6187/6154/2752/10171	31
BP	GO:0006509	membrane protein ectodomain proteolysis	8/1127	42/18862	0.00303386	0.0201538	0.0145492	348/4627/27316/8754/7077/5045/7076/8728	8
BP	GO:0071364	cellular response to epidermal growth factor stimulus	8/1127	42/18862	0.00303386	0.0201538	0.0145492	1915/677/6997/2950/8826/3397/2066/1956	8
BP	GO:1902622	regulation of neutrophil migration	8/1127	42/18862	0.00303386	0.0201538	0.0145492	3929/4192/708/1906/5880/9353/391/1803	8
BP	GO:0019731	antibacterial humoral response	10/1127	61/18862	0.00310007	0.0205683	0.0148485	2243/2244/283/6170/10406/5319/5225/7018/1672/132299	10
BP	GO:0042098	T cell proliferation	22/1127	195/18862	0.00310789	0.020595	0.0148677	6194/977/3479/6188/100133941/3146/7001/301/3958/7037/5880/57678/5621/3572/3123/1503/3481/27242/3485/3280/5573/5074	22
BP	GO:0007162	negative regulation of cell adhesion	30/1127	295/18862	0.00315259	0.0208657	0.0150631	506/387/445/2267/3827/3273/8763/4192/3146/7057/4035/7001/3956/1029/53827/301/3958/4070/1366/5621/3123/10653/7045/5340/27242/23654/4072/5573/4323/5074	30
BP	GO:1901216	positive regulation of neuron death	13/1127	92/18862	0.00316602	0.020929	0.0151088	998/1191/1499/1728/824/1948/4835/2896/1958/5621/3725/2353/22943	13
BP	GO:0009913	epidermal cell differentiation	35/1127	360/18862	0.00318492	0.0210283	0.0151805	6647/1499/823/1825/677/10083/8644/2810/3728/826/3852/3880/301/135228/6768/3855/2069/64065/2627/3853/8754/79413/1514/3875/3856/1830/5652/1832/8796/5493/5045/3280/192666/84189/5920	35
BP	GO:0071774	response to fibroblast growth factor	18/1127	148/18862	0.00320022	0.0211035	0.0152348	1373/5441/677/7057/6997/3187/5015/5595/2264/55959/3185/9592/3178/2625/5430/5434/4670/6422	18
BP	GO:0010633	negative regulation of epithelial cell migration	15/1127	114/18862	0.00322495	0.0211818	0.0152913	350/348/387/5176/3273/11171/3146/7057/3728/4070/9353/6781/1647/11221/91862	15
BP	GO:0002495	antigen processing and presentation of peptide antigen via MHC class II	14/1127	103/18862	0.00322774	0.0211818	0.0152913	375/1173/832/10540/1510/1175/1509/22872/1514/3127/3835/3123/1639/10053	14
BP	GO:0006885	regulation of pH	14/1127	103/18862	0.00322774	0.0211818	0.0152913	9296/537/506/9550/8992/887/11261/1906/5595/2896/5166/252839/533/529	14
BP	GO:0030593	neutrophil chemotaxis	14/1127	103/18862	0.00322774	0.0211818	0.0152913	682/5478/6288/3929/4192/708/1906/3958/5880/9353/5319/1803/5196/6364	14
BP	GO:0048660	regulation of smooth muscle cell proliferation	19/1127	160/18862	0.00327438	0.0214618	0.0154935	3479/2547/283/1499/6648/7168/7520/7057/1906/3673/2950/7052/4835/2069/1956/3725/1026/3248/231	19
BP	GO:0045637	regulation of myeloid cell differentiation	27/1127	258/18862	0.00333565	0.021837	0.0157643	567/3020/3021/2778/537/325/84293/84661/3146/677/7057/2200/7071/10272/3313/3958/8365/3276/3725/8294/3123/55170/2353/10398/5196/6422/8364	27
BP	GO:0001656	metanephros development	12/1127	82/18862	0.00335152	0.0218446	0.0157698	2200/5154/1512/1958/3913/10409/2719/2625/231/3280/157506/793	12
BP	GO:0002834	regulation of response to tumor cell	5/1127	18/18862	0.00336101	0.0218446	0.0157698	3273/3146/3123/3140/3329	5
BP	GO:0002837	regulation of immune response to tumor cell	5/1127	18/18862	0.00336101	0.0218446	0.0157698	3273/3146/3123/3140/3329	5
BP	GO:0032930	positive regulation of superoxide anion generation	5/1127	18/18862	0.00336101	0.0218446	0.0157698	6647/1401/2950/1956/2150	5
BP	GO:0045653	negative regulation of megakaryocyte differentiation	5/1127	18/18862	0.00336101	0.0218446	0.0157698	8365/3276/8294/5196/8364	5
BP	GO:0070293	renal absorption	5/1127	18/18862	0.00336101	0.0218446	0.0157698	8644/3037/10916/2934/1364	5
BP	GO:0055081	anion homeostasis	7/1127	34/18862	0.00346019	0.0224604	0.0162144	1373/5009/1152/2264/5167/771/1244	7
BP	GO:0006695	cholesterol biosynthetic process	11/1127	72/18862	0.00347651	0.0224604	0.0162144	6647/348/3158/10449/5901/1727/7108/57678/29881/6307/337	11
BP	GO:0033627	cell adhesion mediated by integrin	11/1127	72/18862	0.00347651	0.0224604	0.0162144	3273/3694/2200/3673/255743/3685/7448/8754/3688/1803/3383	11
BP	GO:0050891	multicellular organismal water homeostasis	11/1127	72/18862	0.00347651	0.0224604	0.0162144	3925/51599/2810/1579/3037/8529/9076/231/1364/5573/8766	11
BP	GO:1902653	secondary alcohol biosynthetic process	11/1127	72/18862	0.00347651	0.0224604	0.0162144	6647/348/3158/10449/5901/1727/7108/57678/29881/6307/337	11
BP	GO:0042692	muscle cell differentiation	35/1127	362/18862	0.00348187	0.0224644	0.0162172	3020/998/3021/3479/9948/1499/6648/824/9643/4627/7168/1948/1906/29766/858/3880/6926/2069/2627/3856/2876/688/27063/3481/6382/23646/23363/3280/6272/274/5573/4323/2318/22943/57817	35
BP	GO:0006027	glycosaminoglycan catabolic process	10/1127	62/18862	0.00350261	0.0224644	0.0162172	2720/3423/11261/2331/1462/114770/2719/6382/3074/4060	10
BP	GO:0042698	ovulation cycle	10/1127	62/18862	0.00350261	0.0224644	0.0162172	5176/4192/3037/2069/1956/1958/5066/9353/558/5764	10
BP	GO:0051851	modulation by host of symbiont process	10/1127	62/18862	0.00350261	0.0224644	0.0162172	1072/3249/1401/325/348/64710/2040/302/858/3725	10
BP	GO:1903018	regulation of glycoprotein metabolic process	10/1127	62/18862	0.00350261	0.0224644	0.0162172	5861/325/3479/1499/11261/1471/10267/81618/5074/9528	10
BP	GO:0003206	cardiac chamber morphogenesis	15/1127	115/18862	0.00350911	0.0224644	0.0162172	5950/2280/1363/7168/6659/6926/8828/3491/2627/10512/9353/1832/57211/2625/3280	15
BP	GO:0006937	regulation of muscle contraction	19/1127	161/18862	0.00351032	0.0224644	0.0162172	801/6647/805/808/309/7168/2023/1906/3673/3728/481/476/6781/59272/1832/10398/857/274/100507537	19
BP	GO:0098739	import across plasma membrane	19/1127	161/18862	0.00351032	0.0224644	0.0162172	6515/10550/2180/7057/481/6526/483/283375/476/5621/59272/3688/6520/2348/3773/486/64116/23428/3764	19
BP	GO:0034142	toll-like receptor 4 signaling pathway	8/1127	43/18862	0.00353579	0.0226007	0.0163156	3929/929/118788/3146/9971/2150/57402/9111	8
BP	GO:0009749	response to glucose	21/1127	185/18862	0.00354427	0.0226281	0.0163355	3939/1361/10399/5176/79727/55450/6659/7057/336/4035/25874/3956/8431/9971/1958/5105/57678/3123/51714/3383/222546	21
BP	GO:0006972	hyperosmotic response	6/1127	26/18862	0.00367713	0.0234211	0.016908	2547/4519/7520/3176/9076/231	6
BP	GO:0009651	response to salt stress	6/1127	26/18862	0.00367713	0.0234211	0.016908	2547/4519/7520/677/9076/231	6
BP	GO:0017015	regulation of transforming growth factor beta receptor signaling pathway	16/1127	127/18862	0.00372183	0.023678	0.0170934	2805/6233/116844/11171/3675/7057/2200/56937/858/135228/9315/2201/2348/7316/5654/857	16
BP	GO:0048659	smooth muscle cell proliferation	19/1127	162/18862	0.00376021	0.0238941	0.0172494	3479/2547/283/1499/6648/7168/7520/7057/1906/3673/2950/7052/4835/2069/1956/3725/1026/3248/231	19
BP	GO:0040013	negative regulation of locomotion	36/1127	377/18862	0.00376738	0.0239116	0.017262	350/348/387/5176/3273/11171/7168/3418/3146/7057/4035/684/727/1809/3728/2950/2066/4070/10512/9353/5764/4681/6781/10653/1803/7869/1647/8482/2625/11221/91862/6422/4780/7076/51765/127435	36
BP	GO:0006637	acyl-CoA metabolic process	14/1127	105/18862	0.00385477	0.0243376	0.0175696	5162/3158/38/2180/570/25874/2182/2181/117145/5166/57678/60481/6576/348158	14
BP	GO:0019395	fatty acid oxidation	14/1127	105/18862	0.00385477	0.0243376	0.0175696	2108/1892/38/54363/10449/37/34/224/8310/2168/5166/3032/10455/5264	14
BP	GO:0035383	thioester metabolic process	14/1127	105/18862	0.00385477	0.0243376	0.0175696	5162/3158/38/2180/570/25874/2182/2181/117145/5166/57678/60481/6576/348158	14
BP	GO:0035384	thioester biosynthetic process	9/1127	53/18862	0.00385697	0.0243376	0.0175696	5162/38/2180/25874/2182/2181/5166/60481/6576	9
BP	GO:0071616	acyl-CoA biosynthetic process	9/1127	53/18862	0.00385697	0.0243376	0.0175696	5162/38/2180/25874/2182/2181/5166/60481/6576	9
BP	GO:0050921	positive regulation of chemotaxis	17/1127	139/18862	0.00387339	0.0244127	0.0176238	5919/7114/3929/4192/708/3146/7057/7852/1906/3673/5595/5880/9353/5764/2150/3315/57402	17
BP	GO:0035690	cellular response to drug	10/1127	63/18862	0.00394553	0.0248385	0.0179311	7852/1906/1956/7037/1244/2203/27063/6554/4780/1644	10
BP	GO:0051271	negative regulation of cellular component movement	34/1127	352/18862	0.00400306	0.0251714	0.0181715	350/348/387/5176/3273/11171/7168/3418/3146/7057/4035/684/727/1809/3728/2950/2066/4070/9353/5764/4681/6781/10653/1803/1647/2625/11221/91862/6422/4780/7076/51765/127435/274	34
BP	GO:0008625	extrinsic apoptotic signaling pathway via death domain receptors	12/1127	84/18862	0.00409884	0.0257437	0.0185847	2243/2266/2244/7057/3958/598/8795/2876/6422/3383/6272/64114	12
BP	GO:0042407	cristae formation	7/1127	35/18862	0.00410614	0.0257598	0.0185962	506/518/4508/516/9551/522/498	7
BP	GO:2001243	negative regulation of intrinsic apoptotic signaling pathway	13/1127	95/18862	0.00419806	0.0262758	0.0189688	5478/7417/1191/6648/7009/2023/8876/598/4102/2876/7178/3315/4780	13
BP	GO:0009062	fatty acid catabolic process	14/1127	106/18862	0.00420353	0.0262758	0.0189688	2108/1892/38/54363/10449/37/34/224/8310/2168/5105/3032/10455/5264	14
BP	GO:0072009	nephron epithelium development	14/1127	106/18862	0.00420353	0.0262758	0.0189688	1499/100133941/8842/255743/8826/183/3911/4070/3913/10409/2719/2625/3280/793	14
BP	GO:0044262	cellular carbohydrate metabolic process	29/1127	288/18862	0.00420781	0.0262758	0.0189688	7167/2805/801/5499/3417/3479/5236/2720/5226/3418/5223/3146/3487/5167/2538/2632/3037/6526/5105/5166/3953/27232/2203/3572/57733/3481/5836/231/27329	29
BP	GO:0010952	positive regulation of peptidase activity	22/1127	200/18862	0.00422556	0.0263562	0.0190268	10399/6188/2335/10550/10134/3146/27018/3336/1512/3491/64065/1509/2896/351/8795/64063/2934/9131/3329/857/1364/444	22
BP	GO:0001867	complement activation, lectin pathway	4/1127	12/18862	0.0042604	0.0263609	0.0190302	710/10747/78989/2	4
BP	GO:0032352	positive regulation of hormone metabolic process	4/1127	12/18862	0.0042604	0.0263609	0.0190302	3249/1958/2625/157506	4
BP	GO:0042340	keratan sulfate catabolic process	4/1127	12/18862	0.0042604	0.0263609	0.0190302	2720/2331/3074/4060	4
BP	GO:0044849	estrous cycle	4/1127	12/18862	0.0042604	0.0263609	0.0190302	4192/3037/1958/5764	4
BP	GO:0070572	positive regulation of neuron projection regeneration	4/1127	12/18862	0.0042604	0.0263609	0.0190302	4035/2316/2896/5764	4
BP	GO:0098911	regulation of ventricular cardiac muscle cell action potential	4/1127	12/18862	0.0042604	0.0263609	0.0190302	3728/1832/857/274	4
BP	GO:2000767	positive regulation of cytoplasmic translation	4/1127	12/18862	0.0042604	0.0263609	0.0190302	79727/7555/1938/5315	4
BP	GO:0006941	striated muscle contraction	20/1127	176/18862	0.00430865	0.026629	0.0192238	226/801/805/808/7168/7852/2316/3728/481/1938/476/6781/59272/1832/2934/857/274/3764/100507537/5606	20
BP	GO:0071260	cellular response to mechanical stimulus	11/1127	74/18862	0.00431446	0.0266345	0.0192277	2805/664/4055/3673/5595/1956/8795/476/27063/1647/54407	11
BP	GO:0098856	intestinal lipid absorption	5/1127	19/18862	0.00433974	0.0267601	0.0193184	1582/1645/2169/29881/337	5
BP	GO:0030834	regulation of actin filament depolymerization	9/1127	54/18862	0.00438832	0.0270289	0.0195124	832/9948/11034/29766/822/2150/2934/6711/50853	9
BP	GO:1901342	regulation of vasculature development	33/1127	341/18862	0.00440344	0.0270911	0.0195574	718/350/5176/1499/1284/3273/116844/4192/3146/7057/7852/5230/727/3728/1512/3397/6678/2627/2896/5764/10553/3688/1647/5196/3315/6422/4780/2752/5315/100506013/23576/2321/27329	33
BP	GO:0032147	activation of protein kinase activity	32/1127	328/18862	0.00442588	0.0271715	0.0196154	5478/6176/6288/6647/3479/6233/283/7295/3146/7057/7852/6997/727/5595/55765/7001/9052/183/255324/1956/6464/8754/2011/8795/5319/7018/1647/7316/1848/55890/5573/5606	32
BP	GO:0030837	negative regulation of actin filament polymerization	10/1127	64/18862	0.00443156	0.0271715	0.0196154	9168/7114/832/5216/29766/822/9353/2934/6711/50853	10
BP	GO:0050922	negative regulation of chemotaxis	10/1127	64/18862	0.00443156	0.0271715	0.0196154	3273/7057/727/2950/10512/9353/4681/1803/7869/8482	10
BP	GO:0051101	regulation of DNA binding	15/1127	118/18862	0.004487	0.0272545	0.0196753	7114/801/3479/1499/7341/7295/808/3146/3673/8721/3005/3397/3725/2625/3280	15
BP	GO:0000272	polysaccharide catabolic process	6/1127	27/18862	0.00449254	0.0272545	0.0196753	801/5499/5236/3146/2538/5836	6
BP	GO:0007263	nitric oxide mediated signal transduction	6/1127	27/18862	0.00449254	0.0272545	0.0196753	348/7057/183/1956/6690/23576	6
BP	GO:0010758	regulation of macrophage chemotaxis	6/1127	27/18862	0.00449254	0.0272545	0.0196753	5919/4192/7057/727/5595/57509	6
BP	GO:0034123	positive regulation of toll-like receptor signaling pathway	6/1127	27/18862	0.00449254	0.0272545	0.0196753	57142/3929/3146/1535/2150/857	6
BP	GO:0050996	positive regulation of lipid catabolic process	6/1127	27/18862	0.00449254	0.0272545	0.0196753	336/2168/13/337/57104/27329	6
BP	GO:0071624	positive regulation of granulocyte chemotaxis	6/1127	27/18862	0.00449254	0.0272545	0.0196753	3929/4192/708/1906/5880/57402	6
BP	GO:0098901	regulation of cardiac muscle cell action potential	6/1127	27/18862	0.00449254	0.0272545	0.0196753	801/808/3728/1832/857/274	6
BP	GO:1903020	positive regulation of glycoprotein metabolic process	6/1127	27/18862	0.00449254	0.0272545	0.0196753	5861/3479/1499/11261/10267/5074	6
BP	GO:0090092	regulation of transmembrane receptor protein serine/threonine kinase signaling pathway	26/1127	251/18862	0.00449544	0.0272545	0.0196753	2805/6233/2280/116844/11171/3675/7057/2200/56937/858/10272/135228/3491/9315/4681/2201/2719/2348/51232/7316/5654/6422/857/3280/22943/11167	26
BP	GO:0046889	positive regulation of lipid biosynthetic process	12/1127	85/18862	0.00451964	0.0273706	0.0197591	10399/348/824/11261/949/301/3491/2181/9971/60481/337/157506	12
BP	GO:0035264	multicellular organism growth	16/1127	130/18862	0.00468864	0.0283307	0.0204522	3020/3021/2778/6647/3479/22809/677/2538/140606/351/57678/7430/3481/51316/84189/55224	16
BP	GO:1903844	regulation of cellular response to transforming growth factor beta stimulus	16/1127	130/18862	0.00468864	0.0283307	0.0204522	2805/6233/116844/11171/3675/7057/2200/56937/858/135228/9315/2201/2348/7316/5654/857	16
BP	GO:0001974	blood vessel remodeling	8/1127	45/18862	0.00473034	0.028519	0.0205881	3273/2316/7052/183/1471/10512/558/64114	8
BP	GO:0014911	positive regulation of smooth muscle cell migration	8/1127	45/18862	0.00473034	0.028519	0.0205881	3479/6282/4192/4035/3673/3037/8826/7448	8
BP	GO:0009896	positive regulation of catabolic process	41/1127	450/18862	0.00478861	0.0287809	0.0207772	725/722/10247/3479/10399/348/1191/664/10134/7341/3146/677/7416/336/4035/6923/5595/26986/2168/8754/351/7430/79589/13/3320/1075/81603/2719/26353/23530/5045/4780/337/857/23192/57104/27329/10346/57817/665/9528	41
BP	GO:0046902	regulation of mitochondrial membrane permeability	11/1127	75/18862	0.00478973	0.0287809	0.0207772	7534/7417/664/10449/2810/10971/7529/117145/598/90427/665	11
BP	GO:0055117	regulation of cardiac muscle contraction	11/1127	75/18862	0.00478973	0.0287809	0.0207772	801/805/808/3728/481/476/6781/59272/1832/857/274	11
BP	GO:0044344	cellular response to fibroblast growth factor stimulus	17/1127	142/18862	0.00481965	0.0289187	0.0208767	1373/5441/677/7057/6997/3187/5015/5595/2264/55959/3185/3178/2625/5430/5434/4670/6422	17
BP	GO:0071674	mononuclear cell migration	21/1127	190/18862	0.00483843	0.0289187	0.0208767	5919/998/6288/387/4192/708/3146/7057/7852/5595/301/3958/351/9353/4681/2625/58191/57402/3383/2321/6364	21
BP	GO:0014014	negative regulation of gliogenesis	7/1127	36/18862	0.00483936	0.0289187	0.0208767	79727/3418/9921/26022/5764/11221/3280	7
BP	GO:0032892	positive regulation of organic acid transport	7/1127	36/18862	0.00483936	0.0289187	0.0208767	2180/1906/9536/1579/59272/8529/3688	7
BP	GO:0042311	vasodilation	7/1127	36/18862	0.00483936	0.0289187	0.0208767	6647/348/3827/6648/1373/2876/2150	7
BP	GO:0062012	regulation of small molecule metabolic process	40/1127	437/18862	0.00489183	0.0291689	0.0210574	7114/5499/6647/341/3479/348/4513/1728/5901/5693/5223/37/3146/3487/2023/7108/8644/345/2264/5167/301/5690/9056/2168/9971/1958/351/5166/3953/27232/57678/283120/2203/60481/3481/337/130013/857/157506/4953	40
BP	GO:0015718	monocarboxylic acid transport	20/1127	178/18862	0.00489202	0.0291689	0.0210574	10550/366/10599/1645/5244/5320/51660/25874/1906/9536/1109/301/8431/9971/1244/3688/5319/6554/27165/54407	20
BP	GO:0034103	regulation of tissue remodeling	12/1127	86/18862	0.00497429	0.0295661	0.021344	537/3273/4192/1471/1956/5166/7037/3953/7018/6422/64114/57817	12
BP	GO:0001755	neural crest cell migration	9/1127	55/18862	0.00497501	0.0295661	0.021344	2335/309/2066/8828/3911/10512/7869/8482/2348	9
BP	GO:0097345	mitochondrial outer membrane permeabilization	9/1127	55/18862	0.00497501	0.0295661	0.021344	7534/7417/664/10449/2810/10971/7529/90427/665	9
BP	GO:1903131	mononuclear cell differentiation	38/1127	411/18862	0.00508836	0.0302065	0.0218064	28959/567/6194/6647/325/55365/2547/4495/4627/4192/6659/3694/4055/3146/677/7001/3956/8876/301/1958/1514/5105/3953/26022/558/3725/3106/1015/3123/3688/114770/2150/3140/2625/11221/6422/64332/4323	38
BP	GO:0031032	actomyosin structure organization	21/1127	191/18862	0.00513925	0.0304753	0.0220004	389/998/71/9948/387/5216/3925/4627/7168/1906/6281/29766/3880/1266/4070/3856/7791/27063/6422/23363/5573	21
BP	GO:2000146	negative regulation of cell motility	33/1127	345/18862	0.0052488	0.0310908	0.0224448	350/348/387/5176/3273/11171/7168/3418/3146/7057/4035/684/727/1809/3728/2950/2066/4070/9353/5764/4681/6781/10653/1803/1647/2625/11221/91862/6422/4780/7076/51765/127435	33
BP	GO:0003044	regulation of systemic arterial blood pressure mediated by a chemical signal	8/1127	46/18862	0.00543278	0.032011	0.023109	6648/7168/1889/1906/183/185/59272/2150	8
BP	GO:0007595	lactation	8/1127	46/18862	0.00543278	0.032011	0.023109	4513/462/2806/595/2066/5066/1036/857	8
BP	GO:0010823	negative regulation of mitochondrion organization	8/1127	46/18862	0.00543278	0.032011	0.023109	3479/1191/27069/664/10449/598/7037/2876	8
BP	GO:0048146	positive regulation of fibroblast proliferation	8/1127	46/18862	0.00543278	0.032011	0.023109	3479/2335/6277/183/5154/2069/1026/5319	8
BP	GO:0001893	maternal placenta development	6/1127	28/18862	0.0054337	0.032011	0.023109	682/5595/3726/5764/6781/10935	6
BP	GO:0030879	mammary gland development	16/1127	132/18862	0.00544022	0.0320145	0.0231116	57142/823/4513/462/2806/6997/595/3673/6926/2066/5066/1036/2876/2625/857/1999	16
BP	GO:0045056	transcytosis	5/1127	20/18862	0.00550564	0.0322244	0.0232631	5284/4035/64284/2217/8766	5
BP	GO:0046597	negative regulation of viral entry into host cell	5/1127	20/18862	0.00550564	0.0322244	0.0232631	10581/325/10410/81603/2934	5
BP	GO:0046697	decidualization	5/1127	20/18862	0.00550564	0.0322244	0.0232631	682/5595/3726/5764/6781	5
BP	GO:0061318	renal filtration cell differentiation	5/1127	20/18862	0.00550564	0.0322244	0.0232631	100133941/8842/8826/3913/10409	5
BP	GO:0072112	glomerular visceral epithelial cell differentiation	5/1127	20/18862	0.00550564	0.0322244	0.0232631	100133941/8842/8826/3913/10409	5
BP	GO:0031330	negative regulation of cellular catabolic process	26/1127	255/18862	0.00552537	0.0323049	0.0233212	6125/3240/341/81892/9349/6135/6201/26986/26073/345/302/10642/1471/1153/1981/3183/3953/7077/55353/6599/143941/5476/5045/90427/7076/2521	26
BP	GO:1902108	regulation of mitochondrial membrane permeability involved in apoptotic process	10/1127	66/18862	0.00554428	0.0323805	0.0233758	7534/7417/664/10449/2810/10971/7529/117145/90427/665	10
BP	GO:0044273	sulfur compound catabolic process	9/1127	56/18862	0.00562074	0.0327564	0.0236471	38/2720/3423/2331/1462/189/1036/3074/4060	9
BP	GO:0046456	icosanoid biosynthetic process	9/1127	56/18862	0.00562074	0.0327564	0.0236471	1906/8644/9536/1579/301/873/1558/5319/1559	9
BP	GO:2000116	regulation of cysteine-type endopeptidase activity	24/1127	230/18862	0.00564225	0.0328464	0.0237121	10399/6188/10550/831/10134/3146/7057/27018/3336/2810/1512/3491/5272/64065/1509/2168/8795/4102/2876/2934/9131/3329/10935/444	24
BP	GO:0002449	lymphocyte mediated immunity	34/1127	360/18862	0.00565041	0.0328585	0.0237209	567/716/725/722/718/735/1401/325/733/729/715/1191/710/10747/731/732/3263/563/3426/708/3146/3916/727/1512/5272/7037/3106/1075/3123/3140/2625/3329/203068/3383	34
BP	GO:0033762	response to glucagon	7/1127	37/18862	0.00566688	0.0328837	0.0237391	445/1373/4519/5105/1036/1244/5573	7
BP	GO:1901031	regulation of response to reactive oxygen species	7/1127	37/18862	0.00566688	0.0328837	0.0237391	10399/7295/283120/4780/51765/5074/10516	7
BP	GO:0042177	negative regulation of protein catabolic process	15/1127	121/18862	0.0056758	0.0329002	0.023751	6125/9349/6135/6201/2316/302/1471/1956/7077/55353/6599/143941/5476/5045/7076	15
BP	GO:0051146	striated muscle cell differentiation	27/1127	269/18862	0.00585573	0.0335343	0.0242087	3479/9948/824/9643/4627/7168/1948/1906/29766/858/3880/6926/2627/3856/2876/688/27063/3481/6382/23646/23363/6272/5573/4323/2318/22943/57817	27
BP	GO:0034440	lipid oxidation	14/1127	110/18862	0.00586325	0.0335343	0.0242087	2108/1892/38/54363/10449/37/34/224/8310/2168/5166/3032/10455/5264	14
BP	GO:0051341	regulation of oxidoreductase activity	14/1127	110/18862	0.00586325	0.0335343	0.0242087	801/3240/348/808/5447/1906/949/183/1956/185/283120/3320/857/23576	14
BP	GO:0048678	response to axon injury	11/1127	77/18862	0.00586422	0.0335343	0.0242087	6647/664/4035/2316/1809/3956/9315/2896/3913/5764/2348	11
BP	GO:0002679	respiratory burst involved in defense response	4/1127	13/18862	0.00586571	0.0335343	0.0242087	3929/7001/2896/11221	4
BP	GO:0007494	midgut development	4/1127	13/18862	0.00586571	0.0335343	0.0242087	445/1373/5009/1956	4
BP	GO:0009071	serine family amino acid catabolic process	4/1127	13/18862	0.00586571	0.0335343	0.0242087	189/1036/55258/10993	4
BP	GO:0016264	gap junction assembly	4/1127	13/18862	0.00586571	0.0335343	0.0242087	183/2705/59272/857	4
BP	GO:0038183	bile acid signaling pathway	4/1127	13/18862	0.00586571	0.0335343	0.0242087	1582/9971/1244/6554	4
BP	GO:0045837	negative regulation of membrane potential	4/1127	13/18862	0.00586571	0.0335343	0.0242087	664/10550/5764/665	4
BP	GO:0072182	regulation of nephron tubule epithelial cell differentiation	4/1127	13/18862	0.00586571	0.0335343	0.0242087	1499/100133941/8842/2625	4
BP	GO:1902947	regulation of tau-protein kinase activity	4/1127	13/18862	0.00586571	0.0335343	0.0242087	1191/1958/3320/22943	4
BP	GO:2001198	regulation of dendritic cell differentiation	4/1127	13/18862	0.00586571	0.0335343	0.0242087	28959/55365/3146/3106	4
BP	GO:0007249	I-kappaB kinase/NF-kappaB signaling	28/1127	282/18862	0.0058769	0.0335628	0.0242293	389/387/6233/9516/929/2280/347734/4055/684/8878/55765/2316/57153/3956/2950/7052/9971/6284/7037/8795/1653/3123/81603/2150/7316/3315/51523/10346	28
BP	GO:0070555	response to interleukin-1	22/1127	206/18862	0.00598983	0.0341717	0.0246689	2244/6233/5693/1906/8878/3556/5595/27316/3037/301/5690/1958/351/5105/1244/7035/3176/27063/7316/6422/3383/6364	22
BP	GO:0045765	regulation of angiogenesis	32/1127	335/18862	0.00603594	0.0343985	0.0248326	718/350/5176/1499/1284/3273/116844/4192/3146/7057/7852/5230/727/3728/1512/6678/2627/2896/5764/10553/3688/1647/5196/3315/6422/4780/2752/5315/100506013/23576/2321/27329	32
BP	GO:0043122	regulation of I-kappaB kinase/NF-kappaB signaling	25/1127	244/18862	0.0060452	0.034415	0.0248446	389/387/9516/2280/347734/4055/684/8878/55765/2316/57153/3956/2950/7052/9971/6284/7037/8795/1653/3123/81603/2150/3315/51523/10346	25
BP	GO:0030258	lipid modification	27/1127	270/18862	0.00614784	0.0349626	0.0252399	2108/341/348/1892/55004/38/54363/1571/10449/8611/37/336/34/224/183/8310/185/2168/5166/1558/3032/1577/1551/10455/1543/337/5264	27
BP	GO:0050766	positive regulation of phagocytosis	10/1127	67/18862	0.00617678	0.0350536	0.0253055	718/6647/197/336/4035/1535/3673/4240/2150/3561	10
BP	GO:1905953	negative regulation of lipid localization	10/1127	67/18862	0.00617678	0.0350536	0.0253055	1401/341/10550/7057/336/345/3685/19/8529/57104	10
BP	GO:0031055	chromatin remodeling at centromere	8/1127	47/18862	0.00621203	0.0351064	0.0253437	3020/3021/8365/5928/8294/5931/4678/8364	8
BP	GO:0031952	regulation of protein autophosphorylation	8/1127	47/18862	0.00621203	0.0351064	0.0253437	801/805/808/11261/5167/8826/5154/857	8
BP	GO:0097028	dendritic cell differentiation	8/1127	47/18862	0.00621203	0.0351064	0.0253437	28959/55365/3694/4055/3146/558/3106/2150	8
BP	GO:1903053	regulation of extracellular matrix organization	8/1127	47/18862	0.00621203	0.0351064	0.0253437	1361/6624/4035/2264/3037/183/1471/1803	8
BP	GO:0086065	cell communication involved in cardiac conduction	9/1127	57/18862	0.0063293	0.0357318	0.0257952	801/805/808/2316/3728/481/476/1832/857	9
BP	GO:0016126	sterol biosynthetic process	11/1127	78/18862	0.00646815	0.0364397	0.0263062	6647/348/3158/10449/5901/1727/7108/57678/29881/6307/337	11
BP	GO:0061844	antimicrobial humoral immune response mediated by antimicrobial peptide	11/1127	78/18862	0.00646815	0.0364397	0.0263062	2597/283/3273/6170/3151/140823/3853/5319/5225/5196/1672	11
BP	GO:0048024	regulation of mRNA splicing, via spliceosome	13/1127	100/18862	0.00650713	0.0364551	0.0263173	1655/5935/3190/9588/4691/9939/3181/708/27316/1153/283375/3178/55796	13
BP	GO:0010669	epithelial structure maintenance	6/1127	29/18862	0.00651128	0.0364551	0.0263173	5950/11171/55765/7031/56667/12	6
BP	GO:0045940	positive regulation of steroid metabolic process	6/1127	29/18862	0.00651128	0.0364551	0.0263173	341/348/336/183/185/337	6
BP	GO:0050690	regulation of defense response to virus by virus	6/1127	29/18862	0.00651128	0.0364551	0.0263173	567/375/1173/1175/55690/10053	6
BP	GO:0071549	cellular response to dexamethasone stimulus	6/1127	29/18862	0.00651128	0.0364551	0.0263173	445/5176/1956/5105/1244/3383	6
BP	GO:1902430	negative regulation of amyloid-beta formation	6/1127	29/18862	0.00651128	0.0364551	0.0263173	3479/57142/348/1191/5621/274	6
BP	GO:0010742	macrophage derived foam cell differentiation	7/1127	38/18862	0.0065958	0.0368141	0.0265765	1401/5320/3685/19/183/185/5196	7
BP	GO:0045214	sarcomere organization	7/1127	38/18862	0.0065958	0.0368141	0.0265765	9948/7168/1906/3880/3856/27063/5573	7
BP	GO:0090077	foam cell differentiation	7/1127	38/18862	0.0065958	0.0368141	0.0265765	1401/5320/3685/19/183/185/5196	7
BP	GO:0006026	aminoglycan catabolic process	10/1127	68/18862	0.006864	0.0378333	0.0273122	2720/3423/11261/2331/1462/114770/2719/6382/3074/4060	10
BP	GO:0006625	protein targeting to peroxisome	10/1127	68/18862	0.006864	0.0378333	0.0273122	3417/6233/847/54363/570/8310/189/7316/10455/5264	10
BP	GO:0072662	protein localization to peroxisome	10/1127	68/18862	0.006864	0.0378333	0.0273122	3417/6233/847/54363/570/8310/189/7316/10455/5264	10
BP	GO:0072663	establishment of protein localization to peroxisome	10/1127	68/18862	0.006864	0.0378333	0.0273122	3417/6233/847/54363/570/8310/189/7316/10455/5264	10
BP	GO:0010801	negative regulation of peptidyl-threonine phosphorylation	5/1127	21/18862	0.00687623	0.0378333	0.0273122	801/805/808/1981/143941	5
BP	GO:0010875	positive regulation of cholesterol efflux	5/1127	21/18862	0.00687623	0.0378333	0.0273122	348/5444/4035/19/857	5
BP	GO:0035455	response to interferon-alpha	5/1127	21/18862	0.00687623	0.0378333	0.0273122	10581/10410/684/558/2625	5
BP	GO:0043651	linoleic acid metabolic process	5/1127	21/18862	0.00687623	0.0378333	0.0273122	2180/1579/2950/2938/60481	5
BP	GO:0071636	positive regulation of transforming growth factor beta production	5/1127	21/18862	0.00687623	0.0378333	0.0273122	7057/8710/2627/5045/4060	5
BP	GO:0072111	cell proliferation involved in kidney development	5/1127	21/18862	0.00687623	0.0378333	0.0273122	79727/8710/1958/2719/2625	5
BP	GO:0072311	glomerular epithelial cell differentiation	5/1127	21/18862	0.00687623	0.0378333	0.0273122	100133941/8842/8826/3913/10409	5
BP	GO:0150105	protein localization to cell-cell junction	5/1127	21/18862	0.00687623	0.0378333	0.0273122	60/71/51599/2316/1832	5
BP	GO:1902307	positive regulation of sodium ion transmembrane transport	5/1127	21/18862	0.00687623	0.0378333	0.0273122	375/11261/481/483/486	5
BP	GO:2000765	regulation of cytoplasmic translation	5/1127	21/18862	0.00687623	0.0378333	0.0273122	79727/7555/23521/1938/5315	5
BP	GO:0007409	axonogenesis	41/1127	460/18862	0.00692743	0.0380762	0.0274876	682/60/10890/57142/348/387/2335/6277/3925/9260/7852/4035/1948/5015/5595/3909/8828/3911/1382/6464/3918/351/10458/2011/214/3913/5880/10512/9353/391/7430/3320/7869/25987/8482/6711/2625/23654/84189/8766/347733	41
BP	GO:0009895	negative regulation of catabolic process	30/1127	312/18862	0.00700865	0.0384446	0.0277536	6125/3240/341/81892/9349/6135/6201/336/26986/26073/345/2316/302/10642/1471/1956/1153/1981/3183/3953/2203/7077/55353/6599/143941/5476/5045/90427/7076/2521	30
BP	GO:0070661	leukocyte proliferation	30/1127	312/18862	0.00700865	0.0384446	0.0277536	6194/1401/977/3479/6188/1191/100133941/3146/684/5595/7001/2950/301/3958/7037/5880/57678/5621/1026/3572/3123/1503/2150/3481/3329/27242/3485/3280/5573/5074	30
BP	GO:0002673	regulation of acute inflammatory response	8/1127	48/18862	0.00707319	0.0385642	0.0278399	718/325/3818/9536/2950/3572/1773/2161	8
BP	GO:0014009	glial cell proliferation	8/1127	48/18862	0.00707319	0.0385642	0.0278399	1191/6659/3418/9921/3953/1938/5764/3280	8
BP	GO:0043616	keratinocyte proliferation	8/1127	48/18862	0.00707319	0.0385642	0.0278399	4192/677/2810/3037/135228/2069/195814/374	8
BP	GO:0051204	protein insertion into mitochondrial membrane	8/1127	48/18862	0.00707319	0.0385642	0.0278399	7534/2810/3308/140823/10971/7529/3320/90427	8
BP	GO:2000191	regulation of fatty acid transport	8/1127	48/18862	0.00707319	0.0385642	0.0278399	10550/2180/7057/1906/9536/1579/8529/3688	8
BP	GO:2001238	positive regulation of extrinsic apoptotic signaling pathway	8/1127	48/18862	0.00707319	0.0385642	0.0278399	5499/4055/7057/183/51330/6422/857/81618	8
BP	GO:0045851	pH reduction	9/1127	58/18862	0.00710455	0.0386962	0.0279352	9296/537/9550/8992/887/2896/252839/533/529	9
BP	GO:0031397	negative regulation of protein ubiquitination	11/1127	79/18862	0.00711972	0.0387399	0.0279667	5478/6125/6188/9349/6135/6201/11261/6659/8878/143941/857	11
BP	GO:0061326	renal tubule development	12/1127	90/18862	0.00716945	0.0389322	0.0281055	1499/100133941/8842/255743/183/1282/3911/4070/2719/2625/3280/793	12
BP	GO:0090559	regulation of membrane permeability	12/1127	90/18862	0.00716945	0.0389322	0.0281055	7534/7417/664/10449/2810/10971/7529/117145/598/55353/90427/665	12
BP	GO:0033002	muscle cell proliferation	23/1127	222/18862	0.00722348	0.0391863	0.028289	3479/2547/5950/283/1499/6648/7168/7520/7057/1906/3673/2950/7052/2066/4835/2069/1956/2627/3725/1026/3248/231/5573	23
BP	GO:0031668	cellular response to extracellular stimulus	24/1127	235/18862	0.00732865	0.039717	0.0286721	213/3920/29103/8644/5595/2950/7071/1981/9971/5105/5166/283375/558/3725/5764/3178/1026/2353/2348/6422/4780/3383/51765/54407	24
BP	GO:0005976	polysaccharide metabolic process	14/1127	113/18862	0.00742377	0.0401923	0.0290152	801/5499/3479/5236/3146/5167/2538/2632/3037/3953/27232/3572/3481/5836	14
BP	GO:0010565	regulation of cellular ketone metabolic process	20/1127	185/18862	0.00746882	0.0403958	0.0291621	341/1728/5693/37/8644/345/2264/301/5690/9056/2168/9971/1958/5166/60481/337/130013/857/157506/4953	20
BP	GO:0002460	adaptive immune response based on somatic recombination of immune receptors built from immunoglobulin superfamily domains	34/1127	367/18862	0.00752739	0.0406719	0.0293615	567/716/725/722/718/735/1401/325/733/729/715/1191/710/10747/731/732/3263/563/3426/708/3146/727/301/1512/7037/26022/3106/1075/3123/3140/2625/3329/3383/64332	34
BP	GO:0043001	Golgi to plasma membrane protein transport	7/1127	39/18862	0.00763326	0.0411618	0.0297151	10890/10399/83871/2181/3875/81693/6711	7
BP	GO:1905521	regulation of macrophage migration	7/1127	39/18862	0.00763326	0.0411618	0.0297151	5919/4192/7057/727/5595/57509/4323	7
BP	GO:0031348	negative regulation of defense response	24/1127	236/18862	0.00771118	0.0414294	0.0299083	6288/6647/325/3479/348/5176/710/4192/708/2950/5094/5272/4907/2896/9971/3106/2876/3123/2625/11221/5654/9111/57817/2	24
BP	GO:0007176	regulation of epidermal growth factor-activated receptor activity	6/1127	30/18862	0.00773584	0.0414294	0.0299083	9052/2069/255324/6464/351/374	6
BP	GO:0042402	cellular biogenic amine catabolic process	6/1127	30/18862	0.00773584	0.0414294	0.0299083	6303/3176/26002/4128/54498/130013	6
BP	GO:0046685	response to arsenic-containing substance	6/1127	30/18862	0.00773584	0.0414294	0.0299083	5176/1244/3178/1026/1543/54407	6
BP	GO:0002690	positive regulation of leukocyte chemotaxis	12/1127	91/18862	0.00782223	0.0414294	0.0299083	5919/3929/4192/708/3146/7057/1906/5595/5880/5764/2150/57402	12
BP	GO:0006942	regulation of striated muscle contraction	12/1127	91/18862	0.00782223	0.0414294	0.0299083	801/805/808/3728/481/476/6781/59272/1832/857/274/100507537	12
BP	GO:1903321	negative regulation of protein modification by small protein conjugation or removal	12/1127	91/18862	0.00782223	0.0414294	0.0299083	5478/6125/6188/1499/9349/6135/6201/11261/6659/8878/143941/857	12
BP	GO:0006878	cellular copper ion homeostasis	4/1127	14/18862	0.00782827	0.0414294	0.0299083	375/4502/351/5621	4
BP	GO:0010649	regulation of cell communication by electrical coupling	4/1127	14/18862	0.00782827	0.0414294	0.0299083	801/805/808/857	4
BP	GO:0010896	regulation of triglyceride catabolic process	4/1127	14/18862	0.00782827	0.0414294	0.0299083	345/13/337/57104	4
BP	GO:0032488	Cdc42 protein signal transduction	4/1127	14/18862	0.00782827	0.0414294	0.0299083	998/348/345/19	4
BP	GO:0043650	dicarboxylic acid biosynthetic process	4/1127	14/18862	0.00782827	0.0414294	0.0299083	2805/2806/27165/130013	4
BP	GO:0060253	negative regulation of glial cell proliferation	4/1127	14/18862	0.00782827	0.0414294	0.0299083	3418/9921/5764/3280	4
BP	GO:0072350	tricarboxylic acid metabolic process	4/1127	14/18862	0.00782827	0.0414294	0.0299083	3417/445/3418/48	4
BP	GO:0097284	hepatocyte apoptotic process	4/1127	14/18862	0.00782827	0.0414294	0.0299083	3875/3856/283120/2934	4
BP	GO:1900037	regulation of cellular response to hypoxia	4/1127	14/18862	0.00782827	0.0414294	0.0299083	51142/7009/2023/23576	4
BP	GO:1901678	iron coordination entity transport	4/1127	14/18862	0.00782827	0.0414294	0.0299083	3273/3263/10424/3934	4
BP	GO:1901722	regulation of cell proliferation involved in kidney development	4/1127	14/18862	0.00782827	0.0414294	0.0299083	79727/8710/1958/2625	4
BP	GO:1903727	positive regulation of phospholipid metabolic process	4/1127	14/18862	0.00782827	0.0414294	0.0299083	824/11261/2181/9971	4
BP	GO:0030239	myofibril assembly	9/1127	59/18862	0.00795037	0.0420345	0.0303451	9948/7168/1906/29766/3880/3856/27063/23363/5573	9
BP	GO:0032873	negative regulation of stress-activated MAPK cascade	8/1127	49/18862	0.00802141	0.0423274	0.0305566	5478/259/2950/7430/2150/11221/91862/6422	8
BP	GO:0070303	negative regulation of stress-activated protein kinase signaling cascade	8/1127	49/18862	0.00802141	0.0423274	0.0305566	5478/259/2950/7430/2150/11221/91862/6422	8
BP	GO:0030216	keratinocyte differentiation	29/1127	302/18862	0.00806726	0.0425279	0.0307013	823/1825/677/8644/2810/3728/826/3852/3880/301/135228/6768/3855/2069/64065/3853/8754/79413/1514/3875/3856/1830/5652/1832/8796/5493/5045/192666/5920	29
BP	GO:0018108	peptidyl-tyrosine phosphorylation	34/1127	369/18862	0.00815029	0.0429238	0.0309871	3479/10399/3273/3263/100133941/6997/5595/2264/9052/8826/183/5154/2066/2069/255324/1956/6464/2202/7448/351/558/6690/5621/5515/3572/3481/374/6422/3383/857/3280/79705/2321/5606	34
BP	GO:0071322	cellular response to carbohydrate stimulus	16/1127	138/18862	0.00829817	0.0436602	0.0315187	1361/10399/5176/79727/55450/6659/677/4035/25874/3956/9971/5105/3123/51714/3383/222546	16
BP	GO:0055002	striated muscle cell development	13/1127	103/18862	0.00831621	0.0436929	0.0315423	9948/7168/1906/29766/858/3880/3856/2876/27063/6382/23363/5573/2318	13
BP	GO:0008406	gonad development	22/1127	212/18862	0.00832053	0.0436929	0.0315423	3020/3021/4257/6647/3417/283/8644/595/2316/10272/2069/2627/22836/9353/10409/6382/2625/4678/6422/3383/157506/4323	22
BP	GO:0035994	response to muscle stretch	5/1127	22/18862	0.0084685	0.0443408	0.0320101	1499/1906/27063/2353/2934	5
BP	GO:0051131	chaperone-mediated protein complex assembly	5/1127	22/18862	0.0084685	0.0443408	0.0320101	325/1191/3308/3320/3329	5
BP	GO:0060343	trabecula formation	5/1127	22/18862	0.0084685	0.0443408	0.0320101	5950/2280/2201/57211/6422	5
BP	GO:0045185	maintenance of protein location	12/1127	92/18862	0.00852066	0.0445709	0.0321762	9168/7114/7295/10945/11014/2200/2316/7529/4681/2201/2934/857	12
BP	GO:0045766	positive regulation of angiogenesis	19/1127	175/18862	0.00858166	0.0446757	0.0322519	718/116844/4192/3146/7057/7852/727/3728/1512/2627/2896/3688/3315/4780/5315/100506013/23576/2321/27329	19
BP	GO:1904018	positive regulation of vasculature development	19/1127	175/18862	0.00858166	0.0446757	0.0322519	718/116844/4192/3146/7057/7852/727/3728/1512/2627/2896/3688/3315/4780/5315/100506013/23576/2321/27329	19
BP	GO:0030336	negative regulation of cell migration	31/1127	330/18862	0.00858197	0.0446757	0.0322519	350/348/387/5176/3273/11171/7168/3418/3146/7057/4035/684/727/1809/3728/2950/2066/4070/9353/5764/4681/6781/1803/1647/11221/91862/6422/4780/7076/51765/127435	31
BP	GO:0071214	cellular response to abiotic stimulus	31/1127	330/18862	0.00858197	0.0446757	0.0322519	2805/801/2547/664/64710/11261/7520/3694/4055/677/3673/5595/2782/6154/1956/1958/5105/8795/476/5764/1026/27063/1647/2625/2767/6422/90427/231/7076/54407/57817	31
BP	GO:0104004	cellular response to environmental stimulus	31/1127	330/18862	0.00858197	0.0446757	0.0322519	2805/801/2547/664/64710/11261/7520/3694/4055/677/3673/5595/2782/6154/1956/1958/5105/8795/476/5764/1026/27063/1647/2625/2767/6422/90427/231/7076/54407/57817	31
BP	GO:0031331	positive regulation of cellular catabolic process	35/1127	384/18862	0.0086297	0.0448692	0.0323915	10247/3479/10399/348/1191/664/10134/7341/3146/677/7416/4035/6923/5595/26986/2168/8754/351/7430/79589/13/3320/1075/81603/26353/23530/5045/4780/337/857/57104/10346/57817/665/9528	35
BP	GO:0030004	cellular monovalent inorganic cation homeostasis	14/1127	115/18862	0.00863571	0.0448692	0.0323915	9296/537/506/9550/8992/11261/5595/481/2896/483/476/252839/533/529	14
BP	GO:0008207	C21-steroid hormone metabolic process	7/1127	40/18862	0.0087864	0.0456084	0.0329252	1645/1646/8644/1109/1958/231/3283	7
BP	GO:0071333	cellular response to glucose stimulus	15/1127	127/18862	0.00881235	0.0456954	0.032988	1361/10399/5176/79727/55450/6659/4035/25874/3956/9971/5105/3123/51714/3383/222546	15
BP	GO:0003205	cardiac chamber development	17/1127	151/18862	0.00884334	0.0456954	0.032988	5950/2280/1363/7168/6659/6926/8828/3491/2627/10512/9353/9784/1832/57211/2625/8543/3280	17
BP	GO:0010821	regulation of mitochondrion organization	17/1127	151/18862	0.00884334	0.0456954	0.032988	7534/3479/1191/27069/664/10449/7416/8878/2810/10971/7529/598/7037/2876/55170/90427/665	17
BP	GO:0032890	regulation of organic acid transport	9/1127	60/18862	0.00887068	0.0456954	0.032988	10550/2180/7057/1906/9536/1579/59272/8529/3688	9
BP	GO:0034113	heterotypic cell-cell adhesion	9/1127	60/18862	0.00887068	0.0456954	0.032988	2243/2266/2244/3728/3685/64065/4680/3688/1832	9
BP	GO:0051926	negative regulation of calcium ion transport	9/1127	60/18862	0.00887068	0.0456954	0.032988	801/805/808/7416/7009/6690/6781/3383/274	9
BP	GO:0071806	protein transmembrane transport	9/1127	60/18862	0.00887068	0.0456954	0.032988	1191/563/29103/9804/19/10440/140823/9131/3329	9
BP	GO:1902110	positive regulation of mitochondrial membrane permeability involved in apoptotic process	9/1127	60/18862	0.00887068	0.0456954	0.032988	7534/7417/664/10449/2810/10971/7529/90427/665	9
BP	GO:1903202	negative regulation of oxidative stress-induced cell death	8/1127	50/18862	0.00906188	0.0465916	0.033635	5478/10399/6648/7295/8876/2876/3315/4780	8
BP	GO:1904036	negative regulation of epithelial cell apoptotic process	8/1127	50/18862	0.00906188	0.0465916	0.033635	2243/2266/2244/831/4192/2625/4780/3383	8
BP	GO:0071383	cellular response to steroid hormone stimulus	21/1127	201/18862	0.00908599	0.0466138	0.033651	445/5176/1655/4537/8611/677/1906/8644/2950/56937/301/10424/1956/5105/1244/476/57678/7035/6781/6422/3383	21
BP	GO:0002347	response to tumor cell	6/1127	31/18862	0.00911784	0.0466138	0.033651	3273/3146/3176/3123/3140/3329	6
BP	GO:0010644	cell communication by electrical coupling	6/1127	31/18862	0.00911784	0.0466138	0.033651	801/805/808/481/476/857	6
BP	GO:0045907	positive regulation of vasoconstriction	6/1127	31/18862	0.00911784	0.0466138	0.033651	2243/2266/2244/1956/3383/857	6
BP	GO:0097421	liver regeneration	6/1127	31/18862	0.00911784	0.0466138	0.033651	1361/595/55959/1956/9076/57817	6
BP	GO:2000193	positive regulation of fatty acid transport	6/1127	31/18862	0.00911784	0.0466138	0.033651	2180/1906/9536/1579/8529/3688	6
BP	GO:0018212	peptidyl-tyrosine modification	34/1127	372/18862	0.00916438	0.0468075	0.0337908	3479/10399/3273/3263/100133941/6997/5595/2264/9052/8826/183/5154/2066/2069/255324/1956/6464/2202/7448/351/558/6690/5621/5515/3572/3481/374/6422/3383/857/3280/79705/2321/5606	34
BP	GO:0048709	oligodendrocyte differentiation	12/1127	93/18862	0.00926682	0.0472861	0.0341363	9948/1191/664/4192/7852/2950/26022/5764/2934/11221/27242/3280	12
BP	GO:0032024	positive regulation of insulin secretion	10/1127	71/18862	0.00928451	0.0473318	0.0341693	5950/55450/6659/4035/25874/2182/8431/9971/3123/222546	10
BP	GO:0009615	response to virus	33/1127	359/18862	0.00935581	0.0476389	0.034391	10581/1072/375/1191/664/10410/3925/3694/708/7852/2023/684/3159/2316/5094/3609/598/57678/1653/283120/8673/3320/2150/7178/2625/3315/5654/1543/9111/4953/3764/10346/665	33
BP	GO:0060047	heart contraction	27/1127	279/18862	0.00936236	0.0476389	0.034391	998/801/6647/805/808/7168/7852/1906/2316/3728/481/183/483/476/6781/2876/5349/59272/1832/2934/486/857/100506013/274/3764/5606/444	27
BP	GO:0006970	response to osmotic stress	11/1127	82/18862	0.00938506	0.0477096	0.034442	2547/366/4519/7520/677/3673/1956/3176/91862/9076/231	11
BP	GO:0009266	response to temperature stimulus	23/1127	228/18862	0.00983026	0.0499259	0.036042	1361/6647/3479/6648/929/4519/7341/4513/37/7057/7852/5595/1153/79054/1244/3320/1026/5931/2353/3329/26353/51316/27344	23
CC	GO:0030055	cell-substrate junction	110/1145	423/19520	6.21342e-42	2.0595e-39	1.43088e-39	682/5478/567/6132/7534/1072/6176/60/6124/375/6125/6207/998/6175/71/6129/977/6160/10890/6209/6208/6188/387/10109/667/4736/1499/6181/847/3190/6141/5216/6122/9349/6235/6168/6191/2783/823/6205/6193/824/6201/5034/2665/6202/23521/309/6189/4627/3936/3675/5244/11261/3694/9260/308/6169/54751/4035/79026/1948/6133/6136/6155/3673/5595/3159/84951/26986/2316/3728/7052/3685/6187/858/1308/966/3313/8826/301/1266/…	110
CC	GO:0005925	focal adhesion	109/1145	416/19520	6.83084e-42	2.0595e-39	1.43088e-39	682/5478/567/6132/7534/1072/6176/60/6124/375/6125/6207/998/6175/71/6129/977/6160/10890/6209/6208/6188/387/10109/667/4736/1499/6181/847/3190/6141/5216/6122/9349/6235/6168/6191/2783/823/6205/6193/824/6201/5034/2665/6202/23521/309/6189/4627/3936/3675/5244/11261/3694/9260/308/6169/54751/4035/79026/1948/6133/6136/6155/3673/5595/3159/84951/26986/2316/3728/7052/3685/6187/858/966/3313/8826/301/1266/5094/…	109
CC	GO:0022626	cytosolic ribosome	56/1145	107/19520	1.81824e-40	3.65466e-38	2.53915e-38	6132/6176/6124/6144/6125/6207/6175/6194/6129/6160/6209/6208/6188/6164/6159/4736/6233/6228/6161/6181/6141/6224/6122/9349/11224/6235/6168/6191/6147/6135/6205/6193/6137/6206/6201/3921/6202/23521/6189/6167/6165/6170/6229/6134/6227/6169/6133/6136/6155/9045/6187/6142/6154/25873/6143/6171	56
CC	GO:0062023	collagen-containing extracellular matrix	100/1145	423/19520	2.51056e-34	3.78467e-32	2.62949e-32	5919/2243/259/2266/5004/5265/2244/977/325/350/348/1191/667/5176/2267/2335/710/6277/283/3827/1284/3273/3263/5660/311/5005/563/309/462/197/4192/308/7057/871/2200/10085/6281/345/8076/3956/302/1508/7052/255743/1308/1476/301/183/3958/1512/1282/6694/3909/2331/3911/3491/6678/1462/5272/1509/3697/2202/7448/3918/1514/3913/4240/3914/5764/7077/1075/2201/1291/7045/5340/7869/2719/51162/307/8482/5196/6649/5654/…	100
CC	GO:0022625	cytosolic large ribosomal subunit	36/1145	57/19520	1.74387e-30	2.10311e-28	1.46118e-28	6132/6176/6124/6144/6125/6175/6129/6160/6164/6159/4736/6161/6181/6141/6122/9349/11224/6168/6147/6135/6137/23521/6167/6165/6170/6134/6169/6133/6136/6155/9045/6142/6154/25873/6143/6171	36
CC	GO:0044391	ribosomal subunit	61/1145	187/19520	1.5365e-29	1.54418e-27	1.07285e-27	6132/6176/6124/6144/6125/6207/6175/6194/6129/6160/6209/6208/10399/6188/6164/6159/4736/5935/6233/6228/6161/6181/6141/6224/6122/9349/11224/6235/6168/6191/6147/6135/6205/6193/6137/6206/6201/3921/6202/23521/64960/6189/6167/6165/6170/4706/6229/6134/6227/6169/6133/6136/6155/130916/9045/6187/6142/6154/25873/6143/6171	61
CC	GO:0031983	vesicle lumen	78/1145	328/19520	4.00174e-27	3.44722e-25	2.39503e-25	2512/5478/5919/567/718/2243/226/7114/2266/5004/5265/2244/3240/3417/350/3479/1915/1191/2547/6727/2335/710/847/3827/3273/5005/213/3699/2720/116844/9588/2665/197/6282/7276/7520/5223/3146/7057/1727/29952/3728/302/2950/8804/1476/5154/1512/6694/83716/6678/1956/1509/2896/351/10916/1938/3934/7077/3320/1075/6286/5340/2934/3481/7018/5196/5476/58485/203068/3074/5836/6414/7076/5315/51316/12/2	78
CC	GO:0034774	secretory granule lumen	77/1145	322/19520	5.88167e-27	4.43331e-25	3.08014e-25	2512/5478/5919/567/718/2243/226/7114/2266/5004/5265/2244/3240/3417/350/3479/1915/1191/2547/6727/2335/710/847/3827/3273/5005/213/3699/2720/116844/9588/2665/197/6282/7276/7520/5223/3146/7057/1727/29952/3728/302/2950/8804/1476/5154/1512/6694/83716/6678/1509/2896/351/10916/1938/3934/7077/3320/1075/6286/5340/2934/3481/7018/5196/5476/58485/203068/3074/5836/6414/7076/5315/51316/12/2	77
CC	GO:0060205	cytoplasmic vesicle lumen	77/1145	326/19520	1.38754e-26	9.29652e-25	6.45896e-25	2512/5478/5919/567/718/2243/226/7114/2266/5004/5265/2244/3240/3417/350/3479/1915/1191/2547/6727/2335/710/847/3827/3273/5005/213/3699/2720/116844/9588/2665/197/6282/7276/7520/5223/3146/7057/1727/29952/3728/302/2950/8804/1476/5154/1512/6694/83716/6678/1509/2896/351/10916/1938/3934/7077/3320/1075/6286/5340/2934/3481/7018/5196/5476/58485/203068/3074/5836/6414/7076/5315/51316/12/2	77
CC	GO:0072562	blood microparticle	51/1145	146/19520	1.75999e-26	1.06127e-24	7.37342e-25	3075/716/3078/7534/722/718/60/2243/735/1356/259/2266/5004/2244/71/3240/325/733/348/2638/715/1191/2335/710/3827/731/5216/3273/3263/10878/173/5005/213/462/197/2040/5444/336/183/3250/3697/7448/7037/10518/5340/2934/7018/337/12/8542/2	51
CC	GO:0005840	ribosome	64/1145	243/19520	4.57634e-25	2.50867e-23	1.74295e-23	6132/6176/6124/6144/6125/6207/6175/6194/6129/6160/6209/6208/10399/6188/6164/6159/4736/5935/6233/6228/6161/6181/6141/6224/6122/9349/11224/6235/6168/6191/6147/6135/6205/6193/6137/6206/6201/3921/6202/23521/64960/6189/6167/6165/6170/4706/6229/6134/6227/6169/6133/6136/6155/130916/9045/6187/6142/6238/6154/1938/25873/6143/200916/6171	64
CC	GO:0015934	large ribosomal subunit	39/1145	115/19520	4.98602e-20	2.50547e-18	1.74073e-18	6132/6176/6124/6144/6125/6175/6129/6160/6164/6159/4736/5935/6161/6181/6141/6122/9349/11224/6168/6147/6135/6137/23521/6167/6165/6170/4706/6134/6169/6133/6136/6155/130916/9045/6142/6154/25873/6143/6171	39
CC	GO:0005788	endoplasmic reticulum lumen	62/1145	306/19520	4.85429e-18	2.25164e-16	1.56438e-16	567/718/2243/1356/2266/5265/10618/348/1191/334/2335/3827/1284/213/5034/462/197/174/54587/7057/3487/336/871/1906/2200/11098/813/3956/23193/1308/10272/5154/1282/6694/1471/3491/1462/140606/351/3913/2882/4240/493869/1075/1291/8974/2719/7018/51280/10232/8824/337/3484/7076/8542/25870/57104/3895/2159/11167/1287/3912	62
CC	GO:0031093	platelet alpha granule lumen	27/1145	67/19520	1.75384e-16	7.55405e-15	5.24834e-15	2243/226/7114/2266/5004/5265/2244/3479/1191/2335/710/3827/3273/5005/213/197/7057/5154/6678/351/10916/5340/3481/5196/7076/12/2	27
CC	GO:0031091	platelet alpha granule	30/1145	91/19520	2.43635e-15	9.79415e-14	6.8047e-14	2243/226/7114/2266/5004/5265/2244/3479/1191/334/2335/710/3827/3273/5005/213/197/7057/5154/135228/6678/351/10916/5340/5099/3481/5196/7076/12/2	30
CC	GO:0022627	cytosolic small ribosomal subunit	20/1145	46/19520	2.56863e-13	9.68053e-12	6.72576e-12	6207/6194/6209/6208/6188/6233/6228/6224/6235/6191/6205/6193/6206/6201/3921/6202/6189/6229/6227/6187	20
CC	GO:0042788	polysomal ribosome	16/1145	32/19520	4.36809e-12	1.54939e-10	1.07647e-10	6132/6160/4736/6228/6161/6141/6235/6135/6170/6227/6169/6142/1938/25873/6143/6171	16
CC	GO:0101002	ficolin-1-rich granule	38/1145	185/19520	9.20874e-12	2.82758e-10	1.96453e-10	5478/226/5265/3417/387/1915/2547/6727/6515/847/55004/823/5236/2720/2495/116844/374395/3920/5223/3146/3916/3728/1508/2950/1476/3958/1512/1471/83716/1509/1938/7077/3320/1832/2934/51646/5836/5315	38
CC	GO:0042470	melanosome	28/1145	106/19520	9.37839e-12	2.82758e-10	1.96453e-10	682/967/7534/5861/5052/5176/311/5901/5034/309/2040/6184/3916/813/302/23193/1508/822/1509/7529/483/7037/476/64284/3320/3688/6520/4323	28
CC	GO:0048770	pigment granule	28/1145	106/19520	9.37839e-12	2.82758e-10	1.96453e-10	682/967/7534/5861/5052/5176/311/5901/5034/309/2040/6184/3916/813/302/23193/1508/822/1509/7529/483/7037/476/64284/3320/3688/6520/4323	28
CC	GO:0005766	primary lysosome	34/1145	155/19520	1.69561e-11	4.6475e-10	3.22895e-10	2512/967/718/4257/5284/55004/5660/311/5005/2720/9588/2665/374395/3920/2040/7276/1727/29952/684/3916/302/8804/8876/2896/4680/8673/1075/1650/5476/58485/203068/3074/51316/12	34
CC	GO:0042582	azurophil granule	34/1145	155/19520	1.69561e-11	4.6475e-10	3.22895e-10	2512/967/718/4257/5284/55004/5660/311/5005/2720/9588/2665/374395/3920/2040/7276/1727/29952/684/3916/302/8804/8876/2896/4680/8673/1075/1650/5476/58485/203068/3074/51316/12	34
CC	GO:1904813	ficolin-1-rich granule lumen	30/1145	124/19520	1.94032e-11	5.08701e-10	3.53431e-10	5478/226/5265/3417/1915/2547/6727/847/823/5236/2720/2495/116844/5223/3146/3728/1508/2950/1476/1512/1471/83716/1509/1938/7077/3320/2934/51646/5836/5315	30
CC	GO:0098800	inner mitochondrial membrane protein complex	32/1145	142/19520	3.14148e-11	7.89296e-10	5.4838e-10	27089/506/4538/518/4508/516/4725/7388/4519/6390/9551/4539/4537/522/4706/4512/7384/29103/6389/4540/4535/4720/7386/3313/10440/140823/56901/498/84419/7385/55101/1327	32
CC	GO:0034364	high-density lipoprotein particle	14/1145	27/19520	5.15856e-11	1.24425e-09	8.64467e-10	6291/6288/6289/350/341/348/1191/319/5444/336/345/3250/337/8542	14
CC	GO:0015935	small ribosomal subunit	22/1145	74/19520	1.27325e-10	2.95296e-09	2.05163e-09	6207/6194/6209/6208/10399/6188/6233/6228/6224/6235/6191/6205/6193/6206/6201/3921/6202/64960/6189/6229/6227/6187	22
CC	GO:0005844	polysome	21/1145	68/19520	1.51295e-10	3.3293e-09	2.3131e-09	6132/6194/6160/6188/4736/6228/6161/6141/6235/6191/79727/6135/6170/6227/6169/6142/1981/1938/25873/6143/6171	21
CC	GO:0070469	respirasome	26/1145	103/19520	1.54594e-10	3.3293e-09	2.3131e-09	4541/27089/4538/4725/7388/4519/4513/6390/4514/4539/4537/4706/4512/7384/6389/4540/4535/4720/7386/1346/56901/84419/7385/23530/55101/1327	26
CC	GO:0032994	protein-lipid complex	16/1145	39/19520	1.85382e-10	3.85466e-09	2.67811e-09	6291/6288/6289/350/341/348/1191/319/51599/5444/336/345/3250/337/274/8542	16
CC	GO:0045121	membrane raft	50/1145	323/19520	2.92271e-10	5.68515e-09	3.94988e-09	682/929/55004/100133941/824/7846/112464/8611/3920/2040/5244/7416/5230/6997/871/79026/1820/684/6281/5595/949/481/302/858/19/3037/8826/3945/284119/1956/1509/351/483/79054/1938/476/5621/7430/7035/5515/59272/3688/1803/203068/7851/5045/3383/857/5573/4973	50
CC	GO:0098857	membrane microdomain	50/1145	323/19520	2.92271e-10	5.68515e-09	3.94988e-09	682/929/55004/100133941/824/7846/112464/8611/3920/2040/5244/7416/5230/6997/871/79026/1820/684/6281/5595/949/481/302/858/19/3037/8826/3945/284119/1956/1509/351/483/79054/1938/476/5621/7430/7035/5515/59272/3688/1803/203068/7851/5045/3383/857/5573/4973	50
CC	GO:0005765	lysosomal membrane	55/1145	378/19520	4.09575e-10	7.48406e-09	5.19971e-09	967/1356/4257/1173/5284/1915/9516/10410/9550/55004/5660/2783/8763/309/374395/3920/2040/1889/4035/9741/79026/684/3916/2782/949/57153/302/5167/8876/1175/1509/2896/3127/4680/252839/8673/1291/55353/3123/10103/1803/58986/6520/23646/1650/5476/4074/2767/64116/6272/81618/64114/529/10053/9528	55
CC	GO:0098852	lytic vacuole membrane	55/1145	378/19520	4.09575e-10	7.48406e-09	5.19971e-09	967/1356/4257/1173/5284/1915/9516/10410/9550/55004/5660/2783/8763/309/374395/3920/2040/1889/4035/9741/79026/684/3916/2782/949/57153/302/5167/8876/1175/1509/2896/3127/4680/252839/8673/1291/55353/3123/10103/1803/58986/6520/23646/1650/5476/4074/2767/64116/6272/81618/64114/529/10053/9528	55
CC	GO:0034358	plasma lipoprotein particle	15/1145	36/19520	5.30383e-10	9.13774e-09	6.34865e-09	6291/6288/6289/350/341/348/1191/319/51599/5444/336/345/3250/337/8542	15
CC	GO:1990777	lipoprotein particle	15/1145	36/19520	5.30383e-10	9.13774e-09	6.34865e-09	6291/6288/6289/350/341/348/1191/319/51599/5444/336/345/3250/337/8542	15
CC	GO:0098803	respiratory chain complex	23/1145	87/19520	6.52957e-10	1.0937e-08	7.59873e-09	27089/4538/4725/7388/4519/4513/6390/4514/4539/4537/4706/4512/7384/6389/4540/4535/4720/7386/56901/84419/7385/55101/1327	23
CC	GO:0005774	vacuolar membrane	59/1145	431/19520	1.05848e-09	1.68961e-08	1.17389e-08	967/1356/4257/1173/5284/9296/1915/9516/10410/9550/55004/5660/2783/8763/309/374395/3920/2040/1889/4035/9741/79026/684/3916/2782/949/57153/302/5167/8876/1175/1509/7529/2896/81671/3127/4680/252839/8673/1291/55353/3123/10103/1803/58986/6520/23646/1650/5476/4074/2767/64116/6272/533/81618/64114/529/10053/9528	59
CC	GO:0005746	mitochondrial respirasome	23/1145	89/19520	1.06476e-09	1.68961e-08	1.17389e-08	27089/4538/4725/7388/4519/6390/4539/4537/4706/4512/7384/6389/4540/4535/4720/7386/1346/56901/84419/7385/23530/55101/1327	23
CC	GO:0005775	vacuolar lumen	33/1145	173/19520	1.59253e-09	2.46229e-08	1.71073e-08	2512/718/2638/5660/5005/2720/9588/2665/3920/7276/3423/1727/29952/302/1508/8804/2331/1462/1509/2896/1514/3320/1075/2719/6382/23646/5476/58485/203068/3074/51316/12/4060	33
CC	GO:0045178	basal part of cell	41/1145	258/19520	5.35846e-09	8.07788e-08	5.61228e-08	682/667/1499/366/10599/3675/4035/1906/3673/481/302/5167/301/6768/2066/9056/30061/1956/4070/7037/1366/283375/3953/476/64284/768/7430/1015/1832/6520/7018/3248/6554/2348/3773/9843/9076/64116/23428/1364/4072	41
CC	GO:0009925	basal plasma membrane	39/1145	240/19520	6.65906e-09	9.79369e-08	6.80438e-08	682/667/1499/366/10599/3675/4035/481/302/5167/301/6768/2066/9056/30061/1956/4070/7037/1366/283375/3953/476/64284/768/7430/1015/1832/6520/7018/3248/6554/2348/3773/9843/9076/64116/23428/1364/4072	39
CC	GO:0005911	cell-cell junction	61/1145	485/19520	1.47293e-08	2.1147e-07	1.46923e-07	60/3249/998/71/5499/10890/9948/387/1499/10809/4627/6282/5244/6624/1825/9260/51599/54587/79026/1948/595/29766/2316/3728/481/302/2264/1500/1308/8826/301/9074/1266/64065/2705/2707/351/10458/1366/3875/1244/476/3856/7791/79983/1830/1803/1832/1004/91862/23650/5493/9076/23363/231/81607/7094/55679/1364/4072/57817	61
CC	GO:0005604	basement membrane	22/1145	94/19520	1.78509e-08	2.50328e-07	1.73921e-07	977/667/5176/2335/283/1284/2200/302/1308/1282/3909/3911/6678/3918/3913/3914/5764/7045/7076/1287/3898/3912	22
CC	GO:0016323	basolateral plasma membrane	35/1145	211/19520	2.30152e-08	3.15413e-07	2.1914e-07	682/1499/366/10599/3675/4035/481/302/5167/301/6768/2066/9056/30061/1956/7037/1366/283375/3953/476/64284/768/7430/1015/1832/6520/3248/6554/2348/3773/9843/9076/64116/23428/4072	35
CC	GO:0005743	mitochondrial inner membrane	61/1145	493/19520	2.70743e-08	3.62795e-07	2.5206e-07	4541/27089/506/6188/1191/4538/27069/518/4508/516/4725/1373/7388/4519/4513/1571/6390/51629/4514/9551/4539/4537/64960/5009/522/4706/4512/7384/29103/37/6389/4540/4535/51660/2806/4720/25874/57380/7386/3313/3958/10440/1346/140823/56901/4833/117145/598/3032/498/9131/3329/84419/7385/1543/6576/23530/3283/197257/55101/1327	61
CC	GO:0030135	coated vesicle	41/1145	295/19520	2.46985e-07	3.23765e-06	2.24943e-06	567/375/5265/1173/10618/348/10134/10945/54732/5244/1889/11014/1314/4035/1906/966/1212/2069/1175/255324/1956/22872/351/7037/3127/3106/8673/1075/3123/92840/7018/2348/4074/3329/374/7851/5045/90522/6272/55690/10053	41
CC	GO:0070820	tertiary granule	28/1145	164/19520	3.10869e-07	3.98838e-06	2.77101e-06	567/226/5004/3240/3417/387/6515/55004/5236/2495/116844/374395/3920/2040/1535/3916/84418/966/1476/3958/1512/1471/1509/7077/8673/1832/51646/4973	28
CC	GO:1990204	oxidoreductase complex	22/1145	111/19520	4.12487e-07	5.18187e-06	3.60021e-06	27089/4538/5162/4725/7388/4519/6390/5034/4539/4537/4706/4512/7384/6389/4540/4535/4720/1727/1535/7386/7385/55101	22
CC	GO:0005938	cell cortex	41/1145	301/19520	4.25991e-07	5.24229e-06	3.6422e-06	4735/389/2243/2244/10890/103910/9948/387/1915/667/11034/1499/5216/824/4691/4627/6624/2023/2316/1500/1212/3880/3993/2168/22836/3918/4082/5880/2995/391/10518/7430/1639/2934/2317/6711/390/857/57817/793/444	41
CC	GO:0070069	cytochrome complex	12/1145	36/19520	5.26642e-07	6.35131e-06	4.41271e-06	27089/7388/4519/4513/4514/4512/7384/7386/56901/84419/7385/1327	12
CC	GO:0098798	mitochondrial protein-containing complex	37/1145	265/19520	8.40993e-07	9.94351e-06	6.90847e-06	27089/506/4538/518/5162/4508/516/4725/7388/4519/6390/9551/4539/4537/64960/522/4706/4512/7384/29103/6389/4540/7416/4535/4720/9804/130916/7386/3313/10440/140823/56901/498/84419/7385/55101/1327	37
CC	GO:0035578	azurophil granule lumen	19/1145	91/19520	1.09429e-06	1.26896e-05	8.81636e-06	2512/718/5005/2720/9588/2665/7276/1727/29952/302/8804/2896/1075/5476/58485/203068/3074/51316/12	19
CC	GO:1904724	tertiary granule lumen	14/1145	55/19520	2.38132e-06	2.70932e-05	1.88236e-05	567/226/5004/3240/3417/5236/2495/116844/1476/1512/1471/1509/7077/51646	14
CC	GO:0042627	chylomicron	7/1145	13/19520	2.945e-06	3.28858e-05	2.28482e-05	350/341/348/51599/336/345/337	7
CC	GO:0030667	secretory granule membrane	39/1145	305/19520	3.92262e-06	4.30062e-05	2.98795e-05	682/967/4257/5284/10890/387/334/6515/929/55004/5660/374395/3920/2040/1535/684/3916/84418/57153/3685/858/966/8876/8826/135228/3958/6678/5066/4680/391/3106/8673/26002/1832/5099/1650/857/64114/4973	39
CC	GO:0030139	endocytic vesicle	39/1145	307/19520	4.59666e-06	4.94962e-05	3.43886e-05	567/998/1173/6288/3240/10890/348/6233/3263/311/8992/83871/3920/4035/1535/3916/949/3685/19/1212/6678/1175/1956/5880/3127/64284/3106/81693/7791/8673/3320/3123/1803/2934/7018/7316/857/533/8766	39
CC	GO:0035577	azurophil granule membrane	14/1145	58/19520	4.70349e-06	4.9758e-05	3.45704e-05	967/4257/5284/55004/5660/374395/3920/2040/684/3916/8876/4680/8673/1650	14
CC	GO:0045177	apical part of cell	48/1145	414/19520	5.14721e-06	5.35133e-05	3.71795e-05	3249/998/4257/2778/2335/10786/8611/5244/8842/6997/4035/10083/684/1579/481/1508/301/1956/2168/1836/351/1514/1244/476/4680/64284/81693/7430/6781/59272/8529/7348/1803/6520/7018/29881/2348/3485/56667/9076/64116/23428/54825/51765/1364/4072/529/57817	48
CC	GO:0005770	late endosome	36/1145	275/19520	5.35324e-06	5.47119e-05	3.80123e-05	967/375/9516/10410/55004/5660/309/3920/7852/9741/684/3916/8878/5595/302/1512/1956/2896/1514/440335/3127/252839/8673/79589/55353/3123/7178/7018/23646/3140/4074/51150/25849/5573/8766/9528	36
CC	GO:0005750	mitochondrial respiratory chain complex III	7/1145	14/19520	5.59093e-06	5.52316e-05	3.83734e-05	27089/7388/4519/4512/7384/7386/7385	7
CC	GO:0045275	respiratory chain complex III	7/1145	14/19520	5.59093e-06	5.52316e-05	3.83734e-05	27089/7388/4519/4512/7384/7386/7385	7
CC	GO:0005791	rough endoplasmic reticulum	16/1145	75/19520	5.67887e-06	5.52316e-05	3.83734e-05	6124/6228/6141/6235/79727/6726/5352/6227/6184/1906/6155/351/5351/2161/5315/3083	16
CC	GO:0016469	proton-transporting two-sector ATPase complex	13/1145	52/19520	6.75818e-06	6.46854e-05	4.49416e-05	9296/537/506/518/4508/516/9550/8992/9551/522/498/533/529	13
CC	GO:0034361	very-low-density lipoprotein particle	8/1145	20/19520	9.13475e-06	8.47423e-05	5.88766e-05	350/341/348/51599/336/345/337/8542	8
CC	GO:0034385	triglyceride-rich plasma lipoprotein particle	8/1145	20/19520	9.13475e-06	8.47423e-05	5.88766e-05	350/341/348/51599/336/345/337/8542	8
CC	GO:0031528	microvillus membrane	9/1145	26/19520	1.00277e-05	9.16163e-05	6.36524e-05	8842/949/3685/1836/768/7430/6286/23428/54825	9
CC	GO:0016324	apical plasma membrane	41/1145	351/19520	2.06641e-05	0.000185045	0.000128564	3249/2778/2335/10786/8611/5244/8842/6997/684/1579/481/1508/301/1956/1836/1514/1244/476/4680/64284/81693/7430/6781/59272/8529/7348/1803/6520/7018/29881/2348/3485/56667/9076/64116/23428/54825/51765/1364/4072/529	41
CC	GO:0045277	respiratory chain complex IV	8/1145	22/19520	2.08674e-05	0.000185045	0.000128564	4513/4514/4512/7386/56901/84419/7385/1327	8
CC	GO:0030136	clathrin-coated vesicle	27/1145	192/19520	2.16906e-05	0.000189557	0.000131699	1173/10618/348/10134/54732/5244/1889/4035/1906/1212/2069/1175/255324/1956/7037/3127/8673/3123/92840/7018/2348/4074/374/7851/5045/6272/10053	27
CC	GO:0005751	mitochondrial respiratory chain complex IV	6/1145	12/19520	2.73455e-05	0.000232245	0.000161357	4512/7386/56901/84419/7385/1327	6
CC	GO:0043256	laminin complex	6/1145	12/19520	2.73455e-05	0.000232245	0.000161357	3909/3911/3918/3913/3914/3912	6
CC	GO:0046930	pore complex	8/1145	23/19520	3.03551e-05	0.000254224	0.000176628	735/733/729/7417/731/732/7416/727	8
CC	GO:0043202	lysosomal lumen	17/1145	96/19520	3.90457e-05	0.000322528	0.000224084	2638/5660/2720/3920/3423/1508/2331/1462/1509/1514/3320/2719/6382/23646/5476/3074/4060	17
CC	GO:0071013	catalytic step 2 spliceosome	16/1145	87/19520	4.05211e-05	0.000330192	0.000229408	6628/6633/1655/3190/6635/9939/3181/3187/26986/27316/6426/3185/3183/23451/3178/4670	16
CC	GO:0005777	peroxisome	21/1145	136/19520	4.34498e-05	0.00034474	0.000239515	375/4257/10247/6647/3417/847/54363/2180/1428/3418/570/11145/224/2182/2181/8310/2168/189/10455/7086/5264	21
CC	GO:0042579	microbody	21/1145	136/19520	4.34498e-05	0.00034474	0.000239515	375/4257/10247/6647/3417/847/54363/2180/1428/3418/570/11145/224/2182/2181/8310/2168/189/10455/7086/5264	21
CC	GO:0030016	myofibril	29/1145	224/19520	5.2302e-05	0.000409586	0.000284569	7170/375/226/801/832/667/805/2280/808/7168/9260/2023/79026/8878/29766/2316/3728/3880/3856/27063/7169/2317/10398/6711/7171/23363/274/2318/3764	29
CC	GO:0030017	sarcomere	27/1145	203/19520	5.86062e-05	0.000453071	0.000314781	7170/375/226/801/832/667/805/2280/808/7168/9260/2023/8878/29766/2316/3728/3880/3856/27063/7169/2317/10398/6711/7171/23363/274/2318	27
CC	GO:0030662	coated vesicle membrane	25/1145	182/19520	6.39096e-05	0.000487817	0.000338921	567/1173/10618/348/10945/11014/1314/966/1212/2069/1175/255324/1956/22872/7037/3127/3106/8673/3123/92840/7018/2348/4074/374/10053	25
CC	GO:0005902	microvillus	16/1145	91/19520	7.14569e-05	0.000538607	0.000374209	10809/6624/8842/10083/949/51181/3685/5154/1836/768/7430/6286/23428/231/54825/529	16
CC	GO:0032432	actin filament bundle	14/1145	73/19520	7.52598e-05	0.000560267	0.000389258	7170/4627/3936/7168/6624/9260/5358/54751/2316/4082/7791/22885/10398/7171	14
CC	GO:0043292	contractile fiber	29/1145	231/19520	9.13771e-05	0.000671956	0.000466856	7170/375/226/801/832/667/805/2280/808/7168/9260/2023/79026/8878/29766/2316/3728/3880/3856/27063/7169/2317/10398/6711/7171/23363/274/2318/3764	29
CC	GO:0005884	actin filament	18/1145	113/19520	9.91585e-05	0.000720393	0.000500509	7170/60/71/3936/7168/9260/5358/2316/1809/8826/301/2011/5880/79983/7430/7169/7171/5074	18
CC	GO:0042383	sarcolemma	20/1145	134/19520	0.000106362	0.000763531	0.000530479	682/2806/79026/3916/481/858/3880/301/476/3856/10518/7430/1291/3688/10400/857/274/2318/3764/54407	20
CC	GO:0042827	platelet dense granule	7/1145	21/19520	0.000131702	0.000934312	0.000649133	5919/967/350/3699/3920/6694/6414	7
CC	GO:0044754	autolysosome	5/1145	10/19520	0.000135333	0.000948905	0.000659273	2512/2495/3920/3916/8878	5
CC	GO:0098858	actin-based cell projection	27/1145	216/19520	0.000169001	0.00117135	0.000813821	389/998/10809/3936/3675/6624/8842/10083/949/51181/3685/10642/5154/1836/351/10458/768/10518/7430/6286/3688/64787/23428/231/54825/529/793	27
CC	GO:0005753	mitochondrial proton-transporting ATP synthase complex	7/1145	22/19520	0.000183425	0.00125688	0.000873244	506/518/4508/516/9551/522/498	7
CC	GO:0005793	endoplasmic reticulum-Golgi intermediate compartment	19/1145	130/19520	0.000207317	0.00140463	0.000975896	5265/537/2335/10134/5034/10945/54732/11261/8842/3146/9027/871/966/53345/81671/1075/2348/374/90522	19
CC	GO:0009897	external side of plasma membrane	42/1145	402/19520	0.000210637	0.00141127	0.000980507	567/2243/114908/2266/2244/929/563/100133941/824/5034/3675/1889/3694/7057/7852/3916/3673/3685/966/301/4907/8754/214/7037/3953/79054/4240/3875/5621/10917/3572/3123/5340/7018/6382/8482/3140/2348/3561/3383/2217/2159	42
CC	GO:0031233	intrinsic component of external side of plasma membrane	7/1145	23/19520	0.000250393	0.00164117	0.00114024	929/100133941/966/8754/5621/2348/2159	7
CC	GO:0045259	proton-transporting ATP synthase complex	7/1145	23/19520	0.000250393	0.00164117	0.00114024	506/518/4508/516/9551/522/498	7
CC	GO:0033177	proton-transporting two-sector ATPase complex, proton-transporting domain	7/1145	24/19520	0.000335709	0.00217669	0.00151231	518/4508/516/8992/9551/522/533	7
CC	GO:0031253	cell projection membrane	36/1145	337/19520	0.00038138	0.00243984	0.00169513	4735/1072/6188/10109/1915/10786/3936/3675/7168/6624/8842/54587/2782/949/3685/1212/1836/117145/1244/768/81693/7430/59272/6286/3688/64787/79574/1803/10400/29881/6711/2348/26123/23428/7094/54825	36
CC	GO:0033116	endoplasmic reticulum-Golgi intermediate compartment membrane	13/1145	75/19520	0.000384386	0.00243984	0.00169513	5265/537/10134/10945/54732/9027/966/53345/81671/1075/2348/374/90522	13
CC	GO:0030133	transport vesicle	41/1145	402/19520	0.000410538	0.00257869	0.0017916	4735/567/5861/10618/801/10890/3479/7417/808/1363/10945/54732/11261/11014/1314/7416/10567/1906/3916/1809/2264/858/966/1212/25844/83716/22872/351/598/5066/3127/3106/3123/2348/4074/374/5045/6272/274/8766/1644	41
CC	GO:0030057	desmosome	7/1145	25/19520	0.000442823	0.00275281	0.00191257	1825/3728/64065/79983/1830/1832/5493	7
CC	GO:0030665	clathrin-coated vesicle membrane	17/1145	117/19520	0.000469989	0.00289187	0.00200919	1173/10618/348/1212/2069/1175/255324/1956/7037/3127/8673/3123/92840/7018/4074/374/10053	17
CC	GO:0005912	adherens junction	22/1145	172/19520	0.000475284	0.00289491	0.0020113	60/5499/10890/1499/4627/6282/9260/1948/29766/3728/302/1500/301/1266/10458/3875/7791/79983/1004/23650/81607/7094	22
CC	GO:0030666	endocytic vesicle membrane	21/1145	163/19520	0.000574343	0.00346329	0.00240619	567/1173/10890/348/6233/8992/83871/3920/4035/1535/3916/949/1175/5880/3127/3106/8673/3123/7316/857/533	21
CC	GO:0005759	mitochondrial matrix	46/1145	476/19520	0.000618282	0.00369133	0.00256463	2108/10247/6647/506/6188/1892/7417/5162/6648/3158/1373/38/10449/64960/5009/4706/29103/3418/708/37/4191/7416/2806/79586/4720/34/3336/130916/26073/11112/3313/2066/4833/6464/117145/189/598/5166/3032/2876/498/3329/10935/348158/27165/81689	46
CC	GO:0005782	peroxisomal matrix	10/1145	51/19520	0.000653796	0.00382756	0.00265928	3417/847/54363/1428/570/8310/2168/189/10455/5264	10
CC	GO:0031907	microbody lumen	10/1145	51/19520	0.000653796	0.00382756	0.00265928	3417/847/54363/1428/570/8310/2168/189/10455/5264	10
CC	GO:0071682	endocytic vesicle lumen	6/1145	20/19520	0.000764178	0.00443076	0.00307837	6288/3240/348/3263/6678/3320	6
CC	GO:0005903	brush border	15/1145	101/19520	0.000785974	0.00451373	0.00313601	4637/10786/4627/10083/51181/2316/1244/81693/7430/59272/10400/29881/2348/54825/54407	15
CC	GO:0005771	multivesicular body	11/1145	62/19520	0.00086633	0.00475026	0.00330034	967/684/3916/1512/1956/1514/252839/55353/7178/5573/8766	11
CC	GO:0016328	lateral plasma membrane	11/1145	62/19520	0.00086633	0.00475026	0.00330034	1499/3728/481/301/4070/2011/1366/476/9076/1364/4072	11
CC	GO:0005796	Golgi lumen	15/1145	102/19520	0.000872523	0.00475026	0.00330034	5154/2331/1462/351/94025/2719/6382/6649/56667/1672/5045/51150/4060/4323/2159	15
CC	GO:0009295	nucleoid	9/1145	44/19520	0.000876229	0.00475026	0.00330034	506/7417/6648/1373/37/7416/26073/3313/3032	9
CC	GO:0042645	mitochondrial nucleoid	9/1145	44/19520	0.000876229	0.00475026	0.00330034	506/7417/6648/1373/37/7416/26073/3313/3032	9
CC	GO:0031089	platelet dense granule lumen	5/1145	14/19520	0.000882303	0.00475026	0.00330034	5919/350/3699/6694/6414	5
CC	GO:0045263	proton-transporting ATP synthase complex, coupling factor F(o)	5/1145	14/19520	0.000882303	0.00475026	0.00330034	518/4508/516/9551/522	5
CC	GO:0019897	extrinsic component of plasma membrane	21/1145	169/19520	0.000924523	0.00493352	0.00342767	2778/387/6277/1499/2783/6997/2787/6281/2782/3728/1500/858/8826/301/6768/4240/1015/5340/7018/1004/2767	21
CC	GO:0000791	euchromatin	8/1145	36/19520	0.000948209	0.00501553	0.00348465	1499/27316/3015/3005/3006/9971/3725/388610	8
CC	GO:0045335	phagocytic vesicle	18/1145	136/19520	0.00100646	0.00527737	0.00366657	567/998/10890/311/8992/83871/3920/1535/3916/3685/19/5880/3106/7791/8673/2934/533/8766	18
CC	GO:0016327	apicolateral plasma membrane	6/1145	21/19520	0.00101717	0.00528752	0.00367362	3728/3880/9074/1366/3856/1364	6
CC	GO:0042581	specific granule	20/1145	160/19520	0.00112365	0.00577067	0.0040093	567/5004/3240/6515/55004/311/5005/116844/2040/1535/3728/57153/3685/966/1509/3934/7077/8673/64114/4973	20
CC	GO:0001725	stress fiber	11/1145	64/19520	0.00113882	0.00577067	0.0040093	7170/4627/3936/7168/6624/9260/54751/7791/22885/10398/7171	11
CC	GO:0097517	contractile actin filament bundle	11/1145	64/19520	0.00113882	0.00577067	0.0040093	7170/4627/3936/7168/6624/9260/54751/7791/22885/10398/7171	11
CC	GO:0031252	cell leading edge	40/1145	411/19520	0.00118932	0.00597632	0.00415218	1072/60/375/998/6188/387/10109/1915/667/6277/5034/4627/3936/6282/7168/6624/9260/7852/26986/1809/3685/1500/822/10642/8826/351/117145/10458/5880/7430/3688/64787/79574/22885/1803/2934/6711/8543/7094/27329	40
CC	GO:0001726	ruffle	21/1145	175/19520	0.00144481	0.00720016	0.00500247	1072/6188/1915/6277/4627/3936/6282/7168/6624/9260/3685/822/8826/117145/10458/7430/3688/64787/79574/2934/7094	21
CC	GO:0005767	secondary lysosome	5/1145	16/19520	0.00174468	0.00862329	0.00599122	2512/2495/3920/3916/8878	5
CC	GO:0098862	cluster of actin-based cell projections	19/1145	156/19520	0.00200196	0.00981448	0.00681882	4637/389/10786/4627/10083/51181/2316/1244/81693/10518/7430/59272/64787/10400/29881/2348/54825/54407/793	19
CC	GO:0005747	mitochondrial respiratory chain complex I	9/1145	50/19520	0.00225907	0.0108112	0.00751135	4538/4725/4539/4537/4706/4540/4535/4720/55101	9
CC	GO:0030964	NADH dehydrogenase complex	9/1145	50/19520	0.00225907	0.0108112	0.00751135	4538/4725/4539/4537/4706/4540/4535/4720/55101	9
CC	GO:0045271	respiratory chain complex I	9/1145	50/19520	0.00225907	0.0108112	0.00751135	4538/4725/4539/4537/4706/4540/4535/4720/55101	9
CC	GO:0035770	ribonucleoprotein granule	26/1145	244/19520	0.00240782	0.0114324	0.00794292	60/998/6175/6194/3190/6191/7341/79727/7846/4691/677/8878/26986/100131187/25804/10642/8826/1512/84331/1153/1981/1653/550643/203068/55629/64332	26
CC	GO:0036464	cytoplasmic ribonucleoprotein granule	25/1145	234/19520	0.00278646	0.0131269	0.00912017	60/998/6175/6194/3190/6191/79727/7846/4691/677/8878/26986/100131187/25804/10642/8826/1512/84331/1153/1981/1653/550643/203068/55629/64332	25
CC	GO:0005769	early endosome	36/1145	378/19520	0.00292995	0.0136958	0.00951547	567/8630/5861/348/9516/3146/7852/336/4035/5595/345/56937/301/7803/1956/351/7037/9784/64284/3106/55111/8673/55353/2150/7018/23646/3140/3329/10935/337/857/25849/6272/91947/22943/27329	36
CC	GO:0031970	organelle envelope lumen	13/1145	93/19520	0.00297785	0.0137814	0.00957489	6647/847/4725/824/51142/9536/204/4833/351/117145/9131/203068/3283	13
CC	GO:0030863	cortical cytoskeleton	14/1145	104/19520	0.00299396	0.0137814	0.00957489	9948/1915/11034/824/4627/2316/3880/3993/2995/10518/7430/2934/6711/793	14
CC	GO:0033178	proton-transporting two-sector ATPase complex, catalytic domain	5/1145	18/19520	0.00310264	0.0141734	0.0098473	9296/537/506/498/529	5
CC	GO:0030134	COPII-coated ER to Golgi transport vesicle	13/1145	94/19520	0.00327467	0.0148468	0.0103152	567/5265/54732/966/22872/351/3127/3106/1075/3123/2348/374/90522	13
CC	GO:0031902	late endosome membrane	17/1145	140/19520	0.0034678	0.0156051	0.010842	967/9516/10410/55004/309/3920/9741/3916/302/3127/252839/8673/55353/3123/23646/3140/9528	17
CC	GO:0042641	actomyosin	11/1145	74/19520	0.00375619	0.0166785	0.0115877	7170/4627/3936/7168/6624/9260/54751/7791/22885/10398/7171	11
CC	GO:0019898	extrinsic component of membrane	30/1145	304/19520	0.00376165	0.0166785	0.0115877	11343/2778/387/6277/1499/2280/2783/37/6997/2787/6281/2782/3728/1500/858/8826/301/6768/4240/5621/23533/7430/1015/94025/5340/7018/1004/2767/1672/54491	30
CC	GO:0005890	sodium:potassium-exchanging ATPase complex	4/1145	12/19520	0.00398619	0.0173949	0.0120855	481/483/476/486	4
CC	GO:0034709	methylosome	4/1145	12/19520	0.00398619	0.0173949	0.0120855	6628/6633/6635/3276	4
CC	GO:0031362	anchored component of external side of plasma membrane	5/1145	19/19520	0.00400978	0.0173949	0.0120855	929/100133941/966/5621/2348	5
CC	GO:0005681	spliceosomal complex	21/1145	191/19520	0.00417737	0.0179925	0.0125007	6628/6633/1655/5935/3190/6635/4691/9939/3181/3187/26986/25804/27316/6426/3958/3185/1153/3183/23451/3178/4670	21
CC	GO:0030670	phagocytic vesicle membrane	11/1145	77/19520	0.00512026	0.0218973	0.0152136	567/10890/8992/83871/3920/1535/3916/5880/3106/8673/533	11
CC	GO:0005741	mitochondrial outer membrane	21/1145	195/19520	0.00530544	0.0225294	0.0156528	4257/445/7417/6233/664/518/2180/5320/7416/1727/9804/2182/3313/2181/598/57678/3032/4128/7316/90427/665	21
CC	GO:0044853	plasma membrane raft	14/1145	111/19520	0.00542387	0.0228713	0.0158903	112464/8611/5595/949/481/858/3037/284119/483/476/7430/7035/857/5573	14
CC	GO:0030864	cortical actin cytoskeleton	11/1145	78/19520	0.00565302	0.023672	0.0164466	9948/1915/11034/824/4627/3880/3993/10518/2934/6711/793	11
CC	GO:0005901	caveola	11/1145	80/19520	0.0068489	0.028482	0.0197885	112464/8611/5595/949/481/858/284119/483/476/7035/857	11
CC	GO:0005798	Golgi-associated vesicle	12/1145	92/19520	0.00741068	0.0306071	0.021265	375/10618/10945/54732/11014/1314/1212/351/5045/51765/6272/55690	12
CC	GO:0005865	striated muscle thin filament	5/1145	22/19520	0.00784583	0.0321839	0.0223605	7170/7168/29766/7169/7171	5
CC	GO:0001917	photoreceptor inner segment	9/1145	60/19520	0.0079062	0.0322124	0.0223803	682/10083/2987/2782/476/10518/80150/92840/2026	9
CC	GO:0005905	clathrin-coated pit	10/1145	71/19520	0.0082097	0.0332245	0.0230835	1173/4035/1212/1175/351/7037/81693/7018/3329/6272	10
CC	GO:0001772	immunological synapse	7/1145	41/19520	0.00914055	0.0365017	0.0253603	4627/3958/214/7430/3123/3383/5573	7
CC	GO:0099738	cell cortex region	7/1145	41/19520	0.00914055	0.0365017	0.0253603	103910/2023/1500/1212/2168/1639/57817	7
CC	GO:0005811	lipid droplet	12/1145	95/19520	0.00951677	0.0375073	0.026059	2597/6418/10134/123/1727/302/2182/2181/195814/857/157506/57104	12
CC	GO:0032587	ruffle membrane	12/1145	95/19520	0.00951677	0.0375073	0.026059	1072/6188/1915/3936/7168/3685/117145/7430/3688/64787/79574/7094	12
CC	GO:0035580	specific granule lumen	9/1145	62/19520	0.00977841	0.0382882	0.0266015	567/5004/3240/5005/116844/3728/1509/3934/7077	9
CC	GO:0031225	anchored component of membrane	18/1145	170/19520	0.0110753	0.0430865	0.0299353	929/100133941/6997/684/27076/966/8876/135228/8875/4907/148738/5621/4680/7035/2719/10232/8482/2348	18
CC	GO:0036019	endolysosome	5/1145	24/19520	0.0114923	0.0444223	0.0308633	1173/3273/1508/1175/1514	5
MF	GO:0003735	structural constituent of ribosome	58/1126	180/18337	7.9985e-27	7.41461e-24	5.85154e-24	6132/6176/6124/6144/6125/6207/6175/6194/6129/6160/6209/6208/6188/6164/6159/4736/6233/6228/6161/6181/6141/6224/6122/9349/11224/6235/6168/6191/6147/6135/6205/6193/6137/6206/6201/3921/6202/23521/64960/6189/6167/6165/6170/6229/6134/6227/6169/6133/6136/6155/9045/6187/6142/6154/25873/6143/200916/6171	58
MF	GO:0045296	cadherin binding	68/1126	332/18337	6.60474e-19	2.53448e-16	2.00019e-16	682/3939/4735/7534/5861/226/5499/10890/832/3417/57142/10399/5052/6164/6159/1499/3190/5216/831/6147/5901/9588/4627/6282/6624/8842/8407/2023/79026/29766/2810/2316/3728/302/9208/9045/1500/6187/9052/822/53827/8826/301/1266/1956/7529/10458/2011/1938/3875/7430/1015/6286/5214/3688/64787/6520/1004/2317/6711/23650/5493/7094/5315/4072/3895/3898/1968	68
MF	GO:0004857	enzyme inhibitor activity	74/1126	385/18337	8.2022e-19	2.53448e-16	2.00019e-16	2597/718/6125/259/5265/341/10399/334/5176/710/6418/3827/3273/9349/831/6135/3699/6201/55450/462/197/6906/11261/308/336/871/7009/684/727/2810/345/302/26998/1029/1476/8826/301/183/135228/3958/144568/6694/1471/5272/10406/8710/7529/3697/351/9353/6690/5621/5764/1469/7077/7035/5570/1026/10653/5037/2719/307/51232/3315/10935/5045/7076/274/5573/27344/81706/12/27329/2	74
MF	GO:0061134	peptidase regulator activity	53/1126	230/18337	2.56961e-17	5.95507e-15	4.69968e-15	2597/718/259/5265/10399/334/5176/2335/710/3827/3273/831/3699/462/197/6906/27018/871/684/727/302/26998/1476/183/135228/1512/144568/6694/1471/5272/10406/8710/3697/351/6690/5621/1469/7077/7035/64063/1075/10653/5037/2719/51232/10935/5045/857/7076/274/27344/12/2	53
MF	GO:0030414	peptidase inhibitor activity	46/1126	187/18337	2.31348e-16	3.92484e-14	3.09744e-14	2597/718/259/5265/334/5176/710/3827/3273/831/3699/462/197/6906/871/684/727/302/26998/1476/183/135228/144568/6694/1471/5272/10406/8710/3697/351/6690/5621/1469/7077/7035/10653/5037/2719/51232/10935/5045/7076/274/27344/12/2	46
MF	GO:0004866	endopeptidase inhibitor activity	45/1126	180/18337	2.54035e-16	3.92484e-14	3.09744e-14	2597/718/259/5265/334/5176/710/3827/3273/831/3699/462/197/6906/871/684/727/302/26998/1476/183/135228/144568/6694/1471/5272/10406/8710/3697/351/6690/5621/1469/7077/7035/10653/5037/51232/10935/5045/7076/274/27344/12/2	45
MF	GO:0005178	integrin binding	39/1126	142/18337	8.38462e-16	1.11036e-13	8.76287e-14	5478/977/3479/667/2335/5034/4627/3936/3675/3694/3146/7057/2200/10085/3673/255743/3685/3909/3911/3491/1956/7448/8754/3913/4240/7103/5764/7077/1015/3688/7045/3481/8482/3383/7094/4323/27329/10516/3912	39
MF	GO:0061135	endopeptidase regulator activity	45/1126	192/18337	3.41559e-15	3.95781e-13	3.12347e-13	2597/718/259/5265/334/5176/710/3827/3273/831/3699/462/197/6906/871/684/727/302/26998/1476/183/135228/144568/6694/1471/5272/10406/8710/3697/351/6690/5621/1469/7077/7035/10653/5037/51232/10935/5045/7076/274/27344/12/2	45
MF	GO:0016209	antioxidant activity	28/1126	86/18337	9.11088e-14	9.38421e-12	7.40592e-12	4257/3240/6647/5052/348/84293/847/6648/7295/1728/213/9588/9536/7001/2950/2168/2938/2878/2882/493869/2876/2877/51714/7296/6649/10935/6415/337	28
MF	GO:0009055	electron transfer activity	35/1126	138/18337	3.38067e-13	3.13388e-11	2.47322e-11	4541/27089/8630/2108/4538/4725/7388/4519/4513/6390/4514/4539/4537/4706/4512/316/7384/6389/4540/4535/4720/1535/1109/7386/22977/4835/1346/56901/8974/2877/84419/8608/231/1327/444	35
MF	GO:0016614	oxidoreductase activity, acting on CH-OH group of donors	33/1126	130/18337	1.55736e-12	1.31243e-10	1.03576e-10	3939/8630/3417/4190/54363/3290/1645/5226/51084/3418/4191/1646/8644/1109/51181/22949/224/11112/3945/22977/873/124/7358/57016/195814/3032/125/3248/8608/231/3283/157506/197257	33
MF	GO:0004867	serine-type endopeptidase inhibitor activity	28/1126	98/18337	3.40545e-12	2.63071e-10	2.07613e-10	259/5265/334/5176/710/3273/3699/462/6906/871/302/183/135228/144568/5272/10406/8710/3697/351/6690/7035/10653/5037/51232/5045/27344/12/2	28
MF	GO:0016616	oxidoreductase activity, acting on the CH-OH group of donors, NAD or NADP as acceptor	31/1126	120/18337	4.48169e-12	3.19579e-10	2.52208e-10	3939/8630/3417/4190/3290/1645/5226/51084/3418/4191/1646/8644/1109/51181/22949/11112/3945/22977/873/124/7358/57016/195814/3032/125/3248/8608/231/3283/157506/197257	31
MF	GO:1901681	sulfur compound binding	48/1126	260/18337	5.55212e-12	3.6763e-10	2.9013e-10	3075/5478/4257/6288/350/348/334/6159/2335/283/3827/3273/309/462/4192/2160/37/7057/4035/2200/3673/9536/1809/6822/2264/2950/5167/8828/83716/3491/3276/7448/3918/83998/351/27232/9353/5764/2948/5196/53354/200879/10455/6649/6422/7086/27329/11167	48
MF	GO:0016651	oxidoreductase activity, acting on NAD(P)H	28/1126	102/18337	9.91327e-12	6.1264e-10	4.83489e-10	4541/1429/4538/4725/7295/1728/1645/4539/4537/4706/4540/4535/1646/5230/4720/1727/5447/1535/8644/1109/51181/873/4835/51714/7296/9131/10935/23530	28
MF	GO:0019843	rRNA binding	22/1126	64/18337	1.20173e-11	6.96254e-10	5.49477e-10	6132/6125/6207/6175/6208/6188/283/6122/9349/6191/6147/6135/6205/6193/6167/2971/6133/6136/130916/284119/1153/1938	22
MF	GO:0031406	carboxylic acid binding	38/1126	184/18337	2.9396e-11	1.60295e-09	1.26503e-09	2805/341/445/1373/5660/173/213/1645/5009/4706/5352/174/1646/2806/8644/1109/2950/8310/1382/2168/2938/9971/189/5105/5066/27232/5351/6898/2169/8974/5319/2348/55258/5836/57834/23576/5264/1644	38
MF	GO:0098641	cadherin binding involved in cell-cell adhesion	11/1126	18/18337	9.52412e-10	4.90492e-08	3.87091e-08	5499/10890/6282/29766/302/301/1266/10458/3875/23650/4072	11
MF	GO:0005539	glycosaminoglycan binding	40/1126	228/18337	1.5637e-09	7.62919e-08	6.02088e-08	3075/5478/6288/350/348/334/6159/2335/283/3827/3273/3026/309/462/4192/2160/708/7057/2200/1809/2264/55959/8828/83716/3491/1462/7448/3918/83998/351/9353/5621/5764/114770/5196/200879/6649/6422/27329/11167	40
MF	GO:0140272	exogenous protein binding	21/1126	77/18337	4.35171e-09	2.01702e-07	1.59181e-07	682/213/3921/3694/7852/1948/3916/3673/949/3685/9074/1956/7037/558/59272/3688/1803/6554/9076/3383/81607	21
MF	GO:0033293	monocarboxylic acid binding	20/1126	71/18337	5.48875e-09	2.42289e-07	1.91212e-07	341/5660/173/213/1645/4706/174/1646/8644/1109/2950/8310/1382/2168/2938/9971/2169/5319/5836/57834	20
MF	GO:0016655	oxidoreductase activity, acting on NAD(P)H, quinone or similar compound as acceptor	18/1126	60/18337	1.05902e-08	4.4623e-07	3.52161e-07	4541/1429/4538/4725/1728/1645/4539/4537/4706/4540/4535/1646/4720/8644/1109/51181/873/4835	18
MF	GO:0005201	extracellular matrix structural constituent	32/1126	170/18337	1.16868e-08	4.71028e-07	3.71731e-07	2243/2266/2244/2335/1284/7057/2200/10085/8076/255743/1308/1282/3909/2331/3911/3491/6678/1462/2202/7448/3918/3913/4240/3914/2201/1291/7045/127435/4060/1287/10516/3912	32
MF	GO:0008201	heparin binding	31/1126	164/18337	1.78001e-08	6.8753e-07	5.42592e-07	3075/6288/350/348/334/6159/2335/283/3827/3273/462/4192/2160/7057/2200/2264/8828/83716/3491/7448/3918/83998/351/9353/5764/5196/200879/6649/6422/27329/11167	31
MF	GO:0001618	virus receptor activity	20/1126	76/18337	1.97772e-08	7.3334e-07	5.78744e-07	682/3921/3694/7852/1948/3916/3673/949/3685/9074/1956/7037/558/59272/3688/1803/6554/9076/3383/81607	20
MF	GO:0032052	bile acid binding	8/1126	11/18337	2.75693e-08	9.82953e-07	7.75737e-07	1645/1646/8644/1109/2168/9971/5319/5836	8
MF	GO:0098631	cell adhesion mediator activity	17/1126	58/18337	3.98812e-08	1.36926e-06	1.0806e-06	682/5499/10890/3921/6282/3673/29766/3728/302/301/1266/10458/3875/3688/1832/23650/4072	17
MF	GO:0004497	monooxygenase activity	22/1126	101/18337	1.5755e-07	5.21603e-06	4.11644e-06	2328/1571/1582/1645/1646/5447/8644/1109/1579/1562/5066/1558/1577/8529/26002/5092/1551/1555/1543/6307/1559/57834	22
MF	GO:0019838	growth factor binding	26/1126	137/18337	2.28154e-07	7.29308e-06	5.75562e-06	7057/3487/2264/3685/6187/5154/135228/1282/8828/3491/1956/6464/6284/5764/1291/3572/25987/51232/3561/3485/5654/5045/3484/6272/2321/2	26
MF	GO:0004602	glutathione peroxidase activity	10/1126	22/18337	2.40102e-07	7.41915e-06	5.85511e-06	4257/9588/9536/2950/2938/2878/2882/493869/2876/2877	10
MF	GO:0016705	oxidoreductase activity, acting on paired donors, with incorporation or reduction of molecular oxygen	28/1126	160/18337	4.58788e-07	1.37192e-05	1.08271e-05	2328/1571/1582/5034/1645/5352/1646/5447/8644/1109/1579/1562/5066/1558/5351/1577/8529/8974/26002/5092/1551/1555/1543/6307/1559/57834/5264/444	28
MF	GO:0043236	laminin binding	11/1126	29/18337	5.52399e-07	1.60023e-05	1.26289e-05	3921/3675/7057/3673/3956/27076/3958/8754/9353/3688/57211	11
MF	GO:0016709	oxidoreductase activity, acting on paired donors, with incorporation or reduction of molecular oxygen, NAD(P)H as one donor, and incorporation of one atom of oxygen	14/1126	48/18337	6.72455e-07	1.88899e-05	1.49077e-05	2328/1571/1645/1646/5447/8644/1109/1579/8529/1555/1543/6307/1559/57834	14
MF	GO:0050840	extracellular matrix binding	15/1126	55/18337	7.04672e-07	1.92127e-05	1.51624e-05	3921/3675/7057/3673/3956/3685/27076/3958/3491/6678/8754/9353/3688/7045/57211	15
MF	GO:0003779	actin binding	54/1126	439/18337	8.43793e-07	2.23485e-05	1.76372e-05	9168/7170/1072/226/7114/832/9948/2638/10109/667/283/11034/5216/5034/309/4627/3936/7168/6624/9260/5358/7852/10083/29766/84951/2316/822/53827/8826/1266/1956/4082/6744/1938/10095/79983/7430/6876/3688/64787/79574/22885/1773/7169/2934/2317/6711/65108/7171/7094/274/2318/5074/50853	54
MF	GO:0098632	cell-cell adhesion mediator activity	14/1126	49/18337	8.88564e-07	2.28805e-05	1.80571e-05	682/5499/10890/6282/29766/3728/302/301/1266/10458/3875/1832/23650/4072	14
MF	GO:0070330	aromatase activity	10/1126	25/18337	1.02418e-06	2.56597e-05	2.02504e-05	1571/1579/1562/1558/1577/8529/1551/1543/1559/57834	10
MF	GO:0008391	arachidonic acid monooxygenase activity	9/1126	20/18337	1.08969e-06	2.65826e-05	2.09787e-05	1571/1579/1562/1558/8529/1555/1543/1559/57834	9
MF	GO:0051015	actin filament binding	32/1126	208/18337	1.41703e-06	3.36818e-05	2.65814e-05	7170/1072/832/9948/10109/11034/309/4627/3936/7168/6624/5358/10083/2316/822/8826/1956/4082/6744/1938/10095/79983/7430/6876/22885/7169/2934/65108/7171/7094/274/50853	32
MF	GO:0048027	mRNA 5'-UTR binding	10/1126	26/18337	1.5728e-06	3.64496e-05	2.87657e-05	6125/6207/6208/6201/6189/4691/10642/6154/10644/6171	10
MF	GO:0004601	peroxidase activity	14/1126	53/18337	2.51087e-06	5.67701e-05	4.48024e-05	4257/5052/847/9588/9536/7001/2950/2938/2878/2882/493869/2876/2877/10935	14
MF	GO:0005518	collagen binding	16/1126	68/18337	2.60215e-06	5.74331e-05	4.53256e-05	2335/3675/7057/871/3673/1508/5154/6678/8754/1514/1291/3688/7045/57211/127435/4060	16
MF	GO:0048306	calcium-dependent protein binding	18/1126	84/18337	2.67209e-06	5.76053e-05	4.54615e-05	801/6277/10747/311/808/309/6282/11261/6281/302/301/22872/6284/140576/6286/307/57402/2	18
MF	GO:0002020	protease binding	23/1126	131/18337	4.49933e-06	9.47928e-05	7.48095e-05	5265/2335/5660/7341/462/3675/4035/302/3685/1476/144568/1471/5272/5621/4102/7077/3688/1803/7316/5045/7076/274/2	23
MF	GO:0016712	oxidoreductase activity, acting on paired donors, with incorporation or reduction of molecular oxygen, reduced flavin or flavoprotein as one donor, and incorporation of one atom of oxygen	11/1126	35/18337	4.73472e-06	9.75353e-05	7.69739e-05	1571/1579/1562/1558/1577/8529/1551/1555/1543/1559/57834	11
MF	GO:0055102	lipase inhibitor activity	8/1126	18/18337	4.95739e-06	9.99021e-05	7.88417e-05	341/308/336/345/302/301/307/27329	8
MF	GO:0016684	oxidoreductase activity, acting on peroxide as acceptor	14/1126	57/18337	6.38077e-06	0.0001244	9.81753e-05	4257/5052/847/9588/9536/7001/2950/2938/2878/2882/493869/2876/2877/10935	14
MF	GO:0043394	proteoglycan binding	11/1126	36/18337	6.44143e-06	0.0001244	9.81753e-05	3075/348/2335/3273/7057/4035/3673/1508/1514/9353/5764	11
MF	GO:0044548	S100 protein binding	7/1126	14/18337	7.56757e-06	0.000143166	0.000112985	6277/311/6282/79026/302/8826/7430	7
MF	GO:0005504	fatty acid binding	11/1126	37/18337	8.66058e-06	0.000160567	0.000126718	341/173/213/4706/174/2950/8310/2168/2938/2169/57834	11
MF	GO:0017171	serine hydrolase activity	28/1126	188/18337	1.18573e-05	0.000215524	0.000170089	716/3249/3240/715/10747/3818/3026/3426/2160/29952/11098/1512/6768/3250/13/64063/1075/5340/1803/5652/5476/5654/2161/5045/10003/59342/2159/3083	28
MF	GO:0051287	NAD binding	13/1126	53/18337	1.38249e-05	0.000246455	0.0001945	3939/2597/3417/216/51084/316/3418/4720/1727/11112/7358/3248/23530	13
MF	GO:0005506	iron ion binding	24/1126	150/18337	1.45784e-05	0.000254985	0.000201232	2512/1571/1582/2495/5352/316/1579/1562/1036/1558/5351/3934/1577/8529/8974/7018/1551/9843/1555/1543/6307/1559/57834/5264	24
MF	GO:0031492	nucleosomal DNA binding	11/1126	40/18337	1.97522e-05	0.000339079	0.000267598	60/3020/3021/3151/3015/3005/3006/5928/3183/3150/6599	11
MF	GO:0008392	arachidonic acid epoxygenase activity	7/1126	16/18337	2.26191e-05	0.000381235	0.000300866	1571/1579/1562/1558/8529/1555/1559	7
MF	GO:0019842	vitamin binding	23/1126	145/18337	2.51694e-05	0.000416644	0.000328811	2805/733/2638/5950/173/213/5352/2806/1382/189/5066/27232/5351/6898/8974/2348/55258/5836/7086/10993/5264/1644/793	23
MF	GO:0008236	serine-type peptidase activity	27/1126	186/18337	2.69746e-05	0.000438693	0.000346212	716/3249/3240/715/10747/3818/3026/3426/2160/29952/11098/1512/6768/3250/64063/1075/5340/1803/5652/5476/5654/2161/5045/10003/59342/2159/3083	27
MF	GO:0070325	lipoprotein particle receptor binding	9/1126	28/18337	2.86458e-05	0.000457839	0.000361322	1173/1401/348/1191/336/4035/345/9784/22943	9
MF	GO:0004032	alditol:NADP+ 1-oxidoreductase activity	6/1126	12/18337	3.54591e-05	0.000557129	0.000439681	1645/1646/8644/1109/57016/231	6
MF	GO:0033218	amide binding	45/1126	391/18337	3.68084e-05	0.000568689	0.000448804	5478/4257/1173/348/7417/1191/6727/283/3929/847/929/2280/5660/10945/887/1889/37/11014/7416/4035/9804/3673/9536/949/2950/1212/4835/1471/30061/3953/3127/27232/5621/3106/55353/3123/2948/2984/53354/2348/10455/5045/23428/10267/81618	45
MF	GO:0048029	monosaccharide binding	14/1126	67/18337	4.5641e-05	0.000693593	0.000547377	682/226/6515/229/5352/5066/5351/2203/8974/5214/5836/5264/78989/6888	14
MF	GO:0005507	copper ion binding	13/1126	60/18337	5.686e-05	0.00084112	0.000663804	1356/6647/283/4513/213/6284/5066/5621/26002/9843/6649/337/57817	13
MF	GO:0016829	lyase activity	27/1126	194/18337	5.71635e-05	0.00084112	0.000663804	7167/226/2805/6188/1892/2547/229/2027/79746/7520/3146/2023/771/5105/5066/768/3032/2948/48/5092/2984/1543/130013/2026/4953/10993/1644	27
MF	GO:0004859	phospholipase inhibitor activity	6/1126	13/18337	6.24274e-05	0.000904222	0.000713603	341/308/302/301/307/27329	6
MF	GO:0050661	NADP binding	12/1126	53/18337	6.91201e-05	0.000985759	0.000777951	1429/2597/3417/2328/847/3290/1428/5226/5447/7108/11112/23530	12
MF	GO:0016835	carbon-oxygen lyase activity	15/1126	79/18337	7.97277e-05	0.00111981	0.000883744	7167/6188/1892/2547/2027/79746/7520/2023/771/768/3032/48/5092/1543/2026	15
MF	GO:0019207	kinase regulator activity	29/1126	220/18337	8.39801e-05	0.00116193	0.000916986	6176/801/10399/805/100133941/808/55450/197/887/11261/3146/595/2810/2950/9052/1029/8826/7529/10983/2011/5880/901/23533/5570/1026/3481/3315/55890/5573	29
MF	GO:0005496	steroid binding	17/1126	100/18337	0.000116468	0.00158773	0.00125302	2638/7417/3290/319/309/8842/7416/336/345/19/10424/9971/54852/476/337/857/793	17
MF	GO:0003955	NAD(P)H dehydrogenase (quinone) activity	11/1126	48/18337	0.000122771	0.00163304	0.00128878	4541/4538/4725/1728/4539/4537/4706/4540/4535/4720/4835	11
MF	GO:0004745	retinol dehydrogenase activity	7/1126	20/18337	0.000123315	0.00163304	0.00128878	8630/8644/124/195814/125/8608/157506	7
MF	GO:0004033	aldo-keto reductase (NADP) activity	8/1126	27/18337	0.000153081	0.00199867	0.00157733	1645/1646/8644/1109/22977/57016/231/157506	8
MF	GO:0005200	structural constituent of cytoskeleton	17/1126	103/18337	0.000169182	0.00217822	0.00171903	60/71/10109/7846/7168/3852/3880/3853/10095/3123/1832/6711/203068/5493/7094/347733/50853	17
MF	GO:0001848	complement binding	7/1126	21/18337	0.000175208	0.00219483	0.00173214	1401/325/733/10747/731/708/966	7
MF	GO:0008106	alcohol dehydrogenase (NADP+) activity	7/1126	21/18337	0.000175208	0.00219483	0.00173214	1645/1646/8644/1109/57016/231/157506	7
MF	GO:0015078	proton transmembrane transporter activity	19/1126	124/18337	0.000197702	0.0024436	0.00192846	9296/506/4508/9550/4513/8992/4514/9551/522/4512/1346/56901/498/84419/23530/64116/533/529/1327	19
MF	GO:0004252	serine-type endopeptidase activity	23/1126	168/18337	0.000251653	0.0030695	0.00242242	716/3249/3240/715/10747/3818/3026/3426/2160/11098/1512/6768/3250/64063/1075/5340/1803/5652/5654/2161/5045/2159/3083	23
MF	GO:0019887	protein kinase regulator activity	25/1126	190/18337	0.000259256	0.00312118	0.0024632	6176/801/10399/805/100133941/808/55450/11261/3146/595/2810/9052/1029/8826/7529/10983/2011/5880/901/5570/1026/3481/3315/55890/5573	25
MF	GO:0008097	5S rRNA binding	5/1126	11/18337	0.000292622	0.0034777	0.00274457	6125/6122/6135/2971/1938	5
MF	GO:0033764	steroid dehydrogenase activity, acting on the CH-OH group of donors, NAD or NADP as acceptor	8/1126	30/18337	0.000342291	0.00391733	0.00309152	8630/3290/1645/1646/8644/1109/8608/3283	8
MF	GO:0071813	lipoprotein particle binding	8/1126	30/18337	0.000342291	0.00391733	0.00309152	1401/325/348/7057/336/949/3329/23780	8
MF	GO:0071814	protein-lipid complex binding	8/1126	30/18337	0.000342291	0.00391733	0.00309152	1401/325/348/7057/336/949/3329/23780	8
MF	GO:0008395	steroid hydroxylase activity	9/1126	38/18337	0.000387754	0.00438352	0.00345943	1571/1582/1562/1558/1577/1551/1555/1543/1559	9
MF	GO:0016668	oxidoreductase activity, acting on a sulfur group of donors, NAD(P) as acceptor	5/1126	12/18337	0.00047631	0.00531975	0.00419829	7295/5230/51714/7296/10935	5
MF	GO:0004869	cysteine-type endopeptidase inhibitor activity	11/1126	56/18337	0.000515487	0.00563519	0.00444723	3827/3273/831/197/26998/1476/1471/5272/10406/1469/10935	11
MF	GO:0072341	modified amino acid binding	15/1126	93/18337	0.000516711	0.00563519	0.00444723	4257/1373/309/3146/7057/9536/949/302/2950/27232/4240/558/2948/2348/7094	15
MF	GO:0042562	hormone binding	14/1126	84/18337	0.000559055	0.00602324	0.00475348	216/1428/887/7276/1889/1512/30061/1956/6464/3953/476/2984/10267/5315	14
MF	GO:0031625	ubiquitin protein ligase binding	33/1126	293/18337	0.000565288	0.00602324	0.00475348	7534/7167/6125/71/57142/1191/6233/9349/7341/6135/9588/7520/7384/4055/7852/7009/4720/8878/6923/1152/3313/5094/1956/3725/3320/1026/55353/7316/5430/3329/203068/9246/5573	33
MF	GO:0008238	exopeptidase activity	15/1126	95/18337	0.000651048	0.0068582	0.00541242	3249/1361/1363/2160/29952/1512/84735/1369/1075/59272/1803/5476/10003/4323/59342	15
MF	GO:0004364	glutathione transferase activity	7/1126	26/18337	0.000756371	0.00787816	0.00621736	4257/9536/2950/2938/2948/2939/2941	7
MF	GO:0015485	cholesterol binding	10/1126	50/18337	0.000790578	0.00814295	0.00642634	7417/319/309/8842/7416/336/345/19/337/857	10
MF	GO:0016229	steroid dehydrogenase activity	8/1126	34/18337	0.000853025	0.00868961	0.00685775	8630/3290/1645/1646/8644/1109/8608/3283	8
MF	GO:0004175	endopeptidase activity	44/1126	438/18337	0.00090828	0.00915191	0.00722259	716/3249/3240/715/10747/1373/3818/823/824/3026/3426/5693/1889/2160/11098/649/826/1508/1510/1512/6768/5690/3250/1509/8754/1514/64063/1075/59272/10863/5340/1803/5652/5225/5654/2161/5045/6422/23192/4323/2159/3083/8728/9528	44
MF	GO:0042277	peptide binding	34/1126	315/18337	0.00100001	0.0099678	0.00786649	5478/4257/1173/348/1191/6727/283/3929/847/929/10945/887/1889/11014/4035/9804/3673/9536/949/2950/1212/1471/30061/3953/3127/5621/3106/3123/2948/2984/5045/23428/10267/81618	34
MF	GO:0016903	oxidoreductase activity, acting on the aldehyde or oxo group of donors	9/1126	44/18337	0.00121036	0.011563	0.00912542	2597/5162/216/316/8644/1109/224/57016/231	9
MF	GO:0004129	cytochrome-c oxidase activity	7/1126	28/18337	0.00122241	0.011563	0.00912542	4513/4514/4512/1346/56901/84419/1327	7
MF	GO:0015002	heme-copper terminal oxidase activity	7/1126	28/18337	0.00122241	0.011563	0.00912542	4513/4514/4512/1346/56901/84419/1327	7
MF	GO:0016675	oxidoreductase activity, acting on a heme group of donors	7/1126	28/18337	0.00122241	0.011563	0.00912542	4513/4514/4512/1346/56901/84419/1327	7
MF	GO:0016676	oxidoreductase activity, acting on a heme group of donors, oxygen as acceptor	7/1126	28/18337	0.00122241	0.011563	0.00912542	4513/4514/4512/1346/56901/84419/1327	7
MF	GO:0051087	chaperone binding	15/1126	101/18337	0.00124504	0.0115852	0.00914292	1356/2244/6647/1191/2335/213/3336/2896/476/3106/1075/5340/3329/3280/274	15
MF	GO:0050660	flavin adenine dinucleotide binding	13/1126	81/18337	0.00124975	0.0115852	0.00914292	2108/2328/316/37/6389/1727/5447/34/4835/8310/7296/9131/197257	13
MF	GO:0016620	oxidoreductase activity, acting on the aldehyde or oxo group of donors, NAD or NADP as acceptor	8/1126	36/18337	0.00127466	0.0116991	0.00923282	2597/5162/216/8644/1109/224/57016/231	8
MF	GO:0003954	NADH dehydrogenase activity	9/1126	45/18337	0.00143181	0.0127624	0.010072	4541/4538/4725/4539/4537/4706/4540/4535/4720	9
MF	GO:0008137	NADH dehydrogenase (ubiquinone) activity	9/1126	45/18337	0.00143181	0.0127624	0.010072	4541/4538/4725/4539/4537/4706/4540/4535/4720	9
MF	GO:0050136	NADH dehydrogenase (quinone) activity	9/1126	45/18337	0.00143181	0.0127624	0.010072	4541/4538/4725/4539/4537/4706/4540/4535/4720	9
MF	GO:0005080	protein kinase C binding	10/1126	54/18337	0.00147418	0.0128922	0.0101744	10399/112464/708/8878/2316/3685/4082/8754/1832/3315	10
MF	GO:0016597	amino acid binding	10/1126	54/18337	0.00147418	0.0128922	0.0101744	445/1373/5009/2806/189/27232/6898/55258/23576/1644	10
MF	GO:0005520	insulin-like growth factor binding	7/1126	29/18337	0.00152699	0.0132292	0.0104403	3487/3685/3491/51232/3485/5654/3484	7
MF	GO:0001846	opsonin binding	5/1126	15/18337	0.00154683	0.0132769	0.010478	1401/325/10747/708/3685	5
MF	GO:0005543	phospholipid binding	44/1126	451/18337	0.00162575	0.0137772	0.0108728	350/341/348/7417/5216/1373/5660/311/309/5009/5320/3146/7416/308/7057/2806/5444/336/949/345/302/19/822/8826/301/27111/4833/2168/6464/4240/9784/558/27071/55353/5037/2934/307/10400/6711/337/7094/274/2159/50853	44
MF	GO:0016836	hydro-lyase activity	11/1126	64/18337	0.00164353	0.0137772	0.0108728	1892/2027/79746/2023/771/768/3032/48/5092/1543/2026	11
MF	GO:0044389	ubiquitin-like protein ligase binding	33/1126	312/18337	0.00164969	0.0137772	0.0108728	7534/7167/6125/71/57142/1191/6233/9349/7341/6135/9588/7520/7384/4055/7852/7009/4720/8878/6923/1152/3313/5094/1956/3725/3320/1026/55353/7316/5430/3329/203068/9246/5573	33
MF	GO:0044769	ATPase activity, coupled to transmembrane movement of ions, rotational mechanism	6/1126	22/18337	0.00168344	0.0138102	0.0108989	9296/506/9550/8992/533/529	6
MF	GO:0046961	proton-transporting ATPase activity, rotational mechanism	6/1126	22/18337	0.00168344	0.0138102	0.0108989	9296/506/9550/8992/533/529	6
MF	GO:0030246	carbohydrate binding	29/1126	267/18337	0.00206339	0.0167306	0.0132036	682/226/325/6515/229/433/2589/5352/3956/23193/5167/2632/3958/142683/1462/7448/83998/5066/5351/2203/3123/8974/5214/11226/5836/5264/4973/78989/6888	29
MF	GO:0050750	low-density lipoprotein particle receptor binding	6/1126	23/18337	0.00216061	0.0167306	0.0132036	1173/1401/348/1191/9784/22943	6
MF	GO:0043178	alcohol binding	13/1126	86/18337	0.00218353	0.0167306	0.0132036	733/7417/5950/319/309/8842/7416/336/345/19/1382/337/857	13
MF	GO:0019825	oxygen binding	8/1126	39/18337	0.00220091	0.0167306	0.0132036	6648/213/1571/1582/1562/1577/1551/1543	8
MF	GO:0008239	dipeptidyl-peptidase activity	4/1126	10/18337	0.00220186	0.0167306	0.0132036	29952/1075/1803/10003	4
MF	GO:0008401	retinoic acid 4-hydroxylase activity	4/1126	10/18337	0.00220186	0.0167306	0.0132036	1562/1558/1577/1551	4
MF	GO:0030283	testosterone dehydrogenase [NAD(P)] activity	4/1126	10/18337	0.00220186	0.0167306	0.0132036	8630/1645/8644/1109	4
MF	GO:0035374	chondroitin sulfate binding	4/1126	10/18337	0.00220186	0.0167306	0.0132036	309/4192/1809/5764	4
MF	GO:0070008	serine-type exopeptidase activity	4/1126	10/18337	0.00220186	0.0167306	0.0132036	3249/2160/5476/59342	4
MF	GO:0008022	protein C-terminus binding	22/1126	185/18337	0.00224729	0.0169369	0.0133664	2547/667/2335/1499/4691/7520/10567/26986/481/27111/3397/10971/7529/10458/9784/7430/30851/5515/6382/5430/10935/10516	22
MF	GO:0020037	heme binding	18/1126	140/18337	0.0023243	0.017376	0.013713	259/847/3273/1571/1582/4512/1535/1579/1562/10424/1558/1577/8529/1551/1555/1543/1559/57834	18
MF	GO:0003727	single-stranded RNA binding	13/1126	88/18337	0.00269027	0.0199511	0.0157452	6201/7555/3146/3187/26986/27316/301/3609/3185/9987/3183/1653/3178	13
MF	GO:0023026	MHC class II protein complex binding	5/1126	17/18337	0.00287591	0.0206664	0.0163097	311/481/3320/3123/5315	5
MF	GO:0034185	apolipoprotein binding	5/1126	17/18337	0.00287591	0.0206664	0.0163097	4035/949/19/5340/3329	5
MF	GO:0043395	heparan sulfate proteoglycan binding	5/1126	17/18337	0.00287591	0.0206664	0.0163097	3075/348/3273/4035/3673	5
MF	GO:0046933	proton-transporting ATP synthase activity, rotational mechanism	5/1126	17/18337	0.00287591	0.0206664	0.0163097	506/4508/9551/522/498	5
MF	GO:0016627	oxidoreductase activity, acting on the CH-CH group of donors	10/1126	59/18337	0.00293275	0.0209128	0.0165041	6390/1645/37/6389/1646/7108/34/8644/22949/8310	10
MF	GO:0097493	structural molecule activity conferring elasticity	4/1126	11/18337	0.00329286	0.0233014	0.0183892	79026/2200/2201/10516	4
MF	GO:0032934	sterol binding	10/1126	60/18337	0.00332976	0.023384	0.0184544	7417/319/309/8842/7416/336/345/19/337/857	10
MF	GO:0005154	epidermal growth factor receptor binding	7/1126	33/18337	0.00337259	0.0235067	0.0185513	2066/2069/255324/6464/2202/10551/374	7
MF	GO:0031491	nucleosome binding	11/1126	70/18337	0.00342082	0.0236649	0.0186761	60/3020/3021/3151/3015/3005/3006/5928/3183/3150/6599	11
MF	GO:0004180	carboxypeptidase activity	8/1126	42/18337	0.00358752	0.0246343	0.0194411	1361/1363/84735/1369/59272/5476/10003/59342	8
MF	GO:0008144	drug binding	10/1126	61/18337	0.0037683	0.0255971	0.020201	5478/2280/213/6624/2950/2168/3934/29881/2348/5836	10
MF	GO:0004303	estradiol 17-beta-dehydrogenase activity	5/1126	18/18337	0.00378296	0.0255971	0.020201	8630/1645/1646/8644/1109	5
MF	GO:0097718	disordered domain specific binding	7/1126	34/18337	0.00402581	0.027043	0.021342	2597/801/2335/805/808/7430/3320	7
MF	GO:0016504	peptidase activator activity	8/1126	43/18337	0.00417497	0.0274739	0.0216821	10399/2335/27018/1512/351/64063/1075/857	8
MF	GO:0008198	ferrous iron binding	6/1126	26/18337	0.00420851	0.0274739	0.0216821	2512/2495/1036/7018/9843/5264	6
MF	GO:0102567	phospholipase A2 activity (consuming 1,2-dipalmitoylphosphatidylcholine)	6/1126	26/18337	0.00420851	0.0274739	0.0216821	9588/5320/11145/5319/58986/5920	6
MF	GO:0102568	phospholipase A2 activity consuming 1,2-dioleoylphosphatidylethanolamine)	6/1126	26/18337	0.00420851	0.0274739	0.0216821	9588/5320/11145/5319/58986/5920	6
MF	GO:0008035	high-density lipoprotein particle binding	4/1126	12/18337	0.00470113	0.0300548	0.023719	336/949/3329/23780	4
MF	GO:0043295	glutathione binding	4/1126	12/18337	0.00470113	0.0300548	0.023719	4257/9536/2950/2948	4
MF	GO:0052650	NADP-retinol dehydrogenase activity	4/1126	12/18337	0.00470113	0.0300548	0.023719	8644/57016/231/157506	4
MF	GO:0019210	kinase inhibitor activity	11/1126	73/18337	0.00476007	0.0302232	0.0238518	10399/55450/197/11261/2810/1029/7529/5570/1026/3315/5573	11
MF	GO:0048156	tau protein binding	8/1126	44/18337	0.00483377	0.0304824	0.0240564	60/348/1191/2011/3320/5515/1639/274	8
MF	GO:0046906	tetrapyrrole binding	18/1126	150/18337	0.00490433	0.0307183	0.0242426	259/847/3273/1571/1582/4512/1535/1579/1562/10424/1558/1577/8529/1551/1555/1543/1559/57834	18
MF	GO:0030295	protein kinase activator activity	12/1126	84/18337	0.00508868	0.0316591	0.0249851	6176/801/805/100133941/808/3146/9052/8826/2011/1026/3481/55890	12
MF	GO:0038024	cargo receptor activity	11/1126	75/18337	0.00586265	0.0361935	0.0285635	433/3426/4035/949/5167/19/7448/7037/2348/58191/4973	11
MF	GO:0030170	pyridoxal phosphate binding	9/1126	55/18337	0.00593464	0.0361935	0.0285635	2805/213/2806/189/6898/55258/5836/10993/1644	9
MF	GO:0070279	vitamin B6 binding	9/1126	55/18337	0.00593464	0.0361935	0.0285635	2805/213/2806/189/6898/55258/5836/10993/1644	9
MF	GO:0016408	C-acyltransferase activity	5/1126	20/18337	0.00617975	0.0370887	0.02927	38/10449/3032/165679/348158	5
MF	GO:0031418	L-ascorbic acid binding	5/1126	20/18337	0.00617975	0.0370887	0.02927	5352/5066/5351/8974/5264	5
MF	GO:0001968	fibronectin binding	6/1126	28/18337	0.00620145	0.0370887	0.02927	3675/7057/3685/10272/1514/3688	6
MF	GO:0031386	protein tag	4/1126	13/18337	0.00646386	0.0376855	0.029741	6233/7341/59286/7316	4
MF	GO:0031432	titin binding	4/1126	13/18337	0.00646386	0.0376855	0.029741	801/805/808/27063	4
MF	GO:0031994	insulin-like growth factor I binding	4/1126	13/18337	0.00646386	0.0376855	0.029741	3487/3685/3485/3484	4
MF	GO:1900750	oligopeptide binding	4/1126	13/18337	0.00646386	0.0376855	0.029741	4257/9536/2950/2948	4
MF	GO:0050998	nitric-oxide synthase binding	4/1126	14/18337	0.0086151	0.0499137	0.0393914	60/801/808/857	4

## Sheet: KEGG
ID	Description	GeneRatio	BgRatio	pvalue	p.adjust	qvalue	geneID	Count
hsa05171	Coronavirus disease - COVID-19	77/708	232/8104	1.17112e-26	3.72415e-24	2.78603e-24	6132/716/6176/718/6124/2243/6144/735/6125/6207/2266/6175/2244/6194/6129/6160/733/6209/6208/6188/729/6164/715/6159/4736/10747/6233/6228/6161/6181/731/6141/6224/732/6122/9349/11224/6235/6168/6191/6147/6135/6205/6193/6137/6206/6201/3921/6202/23521/6189/6167/6165/6170/6229/6134/6227/6169/6133/6136/727/6155/5595/9045/6187/6142/6154/1956/185/3725/59272/3572/25873/6143/2353/200916/6171	77
hsa03010	Ribosome	58/708	158/8104	9.09988e-23	1.44688e-20	1.08241e-20	6132/6176/6124/6144/6125/6207/6175/6194/6129/6160/6209/6208/6188/6164/6159/4736/6233/6228/6161/6181/6141/6224/6122/9349/11224/6235/6168/6191/6147/6135/6205/6193/6137/6206/6201/3921/6202/23521/64960/6189/6167/6165/6170/6229/6134/6227/6169/6133/6136/6155/9045/6187/6142/6154/25873/6143/200916/6171	58
hsa04610	Complement and coagulation cascades	34/708	85/8104	3.96842e-15	4.20653e-13	3.14689e-13	3075/716/3078/725/722/718/2243/735/2266/5265/2244/1361/733/729/715/1191/710/10747/3827/731/732/10878/3818/462/3426/2160/727/966/7448/7035/5340/2161/2159/2	34
hsa05208	Chemical carcinogenesis - reactive oxygen species	55/708	223/8104	5.06208e-13	4.02435e-11	3.0106e-11	4541/27089/4257/6647/506/7417/4538/518/847/4508/6648/516/4725/7388/4519/4513/1728/1571/6390/1645/4514/4539/4537/522/4706/4512/2052/7384/6389/4540/7416/4535/1646/4720/1535/8644/5595/1109/7386/873/1346/56901/1956/1836/2938/3725/2948/2939/2353/498/7385/1543/4780/1327/2941	55
hsa00190	Oxidative phosphorylation	37/708	134/8104	1.14907e-10	7.30807e-09	5.46715e-09	4541/27089/9296/537/506/4538/518/4508/516/9550/4725/7388/4519/4513/8992/6390/4514/9551/4539/4537/522/4706/4512/7384/6389/4540/4535/4720/7386/1346/56901/5464/498/7385/533/529/1327	37
hsa01200	Carbon metabolism	33/708	115/8104	3.93552e-10	2.08582e-08	1.5604e-08	2597/7167/226/2805/3417/1892/229/5162/847/4190/1373/38/54363/2027/6390/5226/3418/5223/6389/4191/2806/5230/2023/8310/189/2203/5214/48/2026/5315/7086/10993/6888	33
hsa01230	Biosynthesis of amino acids	24/708	75/8104	9.36524e-09	4.25449e-07	3.18277e-07	2597/7167/226/2805/3417/445/229/1373/2027/5009/3418/5223/2806/5230/2023/4144/5214/48/2752/2026/5315/7086/10993/6888	24
hsa04510	Focal adhesion	43/708	201/8104	2.05835e-08	8.18195e-07	6.12089e-07	60/998/71/5499/103910/3479/387/2335/1499/1284/824/3675/3694/7057/595/3673/5595/2316/3685/858/5154/1282/3909/3911/1956/6464/7448/3918/3913/5880/3914/3725/7791/1291/3688/2317/10398/857/7094/2321/2318/1287/3912	43
hsa05415	Diabetic cardiomyopathy	42/708	203/8104	8.24868e-08	2.91453e-06	2.18035e-06	4541/2597/27089/5499/506/7417/4538/518/5162/4508/516/4725/7388/4519/4513/6390/4514/4539/4537/522/4706/4512/7384/6389/4540/7416/4535/51660/4720/25874/1535/7386/183/1346/56901/1509/185/5166/5880/498/7385/1327	42
hsa00010	Glycolysis / Gluconeogenesis	21/708	67/8104	1.18959e-07	3.53437e-06	2.64405e-06	3939/2597/7167/226/229/5162/5236/2027/5223/5230/2023/224/2538/3945/124/5105/2203/5214/125/2026/5315	21
hsa05012	Parkinson disease	50/708	266/8104	1.22258e-07	3.53437e-06	2.64405e-06	4541/27089/2778/801/6647/506/7417/4538/6233/518/4508/516/4725/805/7388/4519/7295/4513/6390/7846/4514/808/4539/4537/5693/522/4706/4512/7384/6389/4540/7416/4535/4720/7386/5690/1346/56901/598/283375/4128/498/7316/7385/203068/64116/4780/9246/1327/347733	50
hsa05204	Chemical carcinogenesis - DNA adducts	21/708	69/8104	2.09068e-07	5.5403e-06	4.14468e-06	4257/7363/3290/1571/2052/54657/1646/6822/2950/1562/873/2938/1558/1577/2948/2939/1551/1543/1559/7364/2941	21
hsa05418	Fluid shear stress and atherosclerosis	32/708	139/8104	2.36824e-07	5.79308e-06	4.33378e-06	60/4257/71/801/387/445/1499/805/7341/7295/1728/808/1906/1535/8878/2950/3685/858/5154/2938/1514/5880/3725/3320/2948/2939/2353/6382/4780/3383/857/2941	32
hsa05020	Prion disease	50/708	273/8104	2.83212e-07	6.43296e-06	4.81247e-06	4541/27089/735/6647/506/733/729/7417/4538/518/4508/731/516/732/4725/7388/4519/4513/6390/7846/4514/4539/4537/5693/522/4706/4512/7384/6389/4540/7416/4535/4720/1535/727/5595/858/7386/5690/1346/56901/1958/5880/5621/498/7385/203068/857/1327/347733	50
hsa00980	Metabolism of xenobiotics by cytochrome P450	22/708	78/8104	4.73154e-07	1.00309e-05	7.50405e-06	4257/7363/3290/1571/1645/2052/54657/6822/2950/22977/873/124/2938/1577/2948/2939/125/1555/1543/1559/7364/2941	22
hsa04216	Ferroptosis	15/708	41/8104	8.33348e-07	1.65628e-05	1.23906e-05	2512/1356/7417/2495/2180/2182/5094/2181/30061/6303/7037/5621/6520/7018/64116	15
hsa05016	Huntington disease	52/708	306/8104	1.79758e-06	3.36254e-05	2.5155e-05	4541/27089/1173/6647/506/7417/4538/518/4508/6648/516/4725/5441/7388/4519/4513/6390/7846/4514/10540/4539/4537/5693/522/4706/4512/7384/6389/4540/7416/4535/4720/7052/7386/1212/5690/1346/1175/56901/2878/2882/493869/2876/1639/2877/498/5430/7385/5434/203068/1327/347733	52
hsa00480	Glutathione metabolism	17/708	58/8104	5.36136e-06	9.47174e-05	7.08578e-05	4257/3417/9588/5226/3418/9027/2950/2938/2878/2882/493869/2876/2948/2877/2939/4953/2941	17
hsa05014	Amyotrophic lateral sclerosis	57/708	364/8104	8.01843e-06	0.000129587	9.69433e-05	4541/27089/60/5861/71/6647/506/4538/283/518/847/4508/516/5216/4725/7388/4519/311/4513/6390/7846/4514/10540/4539/4537/5693/522/4706/4512/3181/7384/6389/4540/7416/4535/4720/8878/7386/5690/2066/1346/56901/2878/598/2882/493869/3178/2876/1639/2877/498/7385/203068/2521/1327/347733/5606	57
hsa00982	Drug metabolism - cytochrome P450	19/708	72/8104	8.38959e-06	0.000129587	9.69433e-05	4257/7363/2328/1571/316/54657/2950/124/2938/1558/1577/2948/2939/125/4128/1555/1559/7364/2941	19
hsa04714	Thermogenesis	41/708	232/8104	8.5576e-06	0.000129587	9.69433e-05	4541/27089/60/11343/71/2778/6194/506/4538/518/4508/516/4725/7388/4519/4513/6390/4514/9551/4539/4537/2180/522/4706/4512/7384/6389/4540/4535/4720/2182/7386/1346/2181/56901/6599/498/7385/57104/1327/5606	41
hsa00071	Fatty acid degradation	14/708	43/8104	9.44712e-06	0.000136554	0.000102156	1892/38/10449/2180/37/34/224/2182/124/2181/8310/3032/125/10455	14
hsa00830	Retinol metabolism	18/708	68/8104	1.37999e-05	0.000190798	0.000142736	8630/7363/216/316/54657/1562/124/1558/195814/1577/125/1551/8608/1555/1543/1559/157506/7364	18
hsa04145	Phagosome	30/708	152/8104	1.58979e-05	0.000210648	0.000157585	718/60/71/9296/537/715/929/9550/8992/7846/3920/7057/1535/3916/3673/949/3685/1514/7037/3127/3106/3123/3688/4074/203068/533/529/4973/78989/347733	30
hsa04978	Mineral absorption	16/708	60/8104	3.73831e-05	0.000475512	0.000355729	2512/4502/4501/4499/4495/4493/2495/4494/4496/481/30061/483/476/7018/486/9843	16
hsa04260	Cardiac muscle contraction	20/708	87/8104	4.42464e-05	0.000541168	0.000404846	7170/27089/7388/4519/4513/4514/7168/4512/7384/481/7386/1346/483/476/7169/486/7171/7385/1327/444	20
hsa00590	Arachidonic acid metabolism	16/708	61/8104	4.66408e-05	0.000549325	0.000410948	1571/5320/11145/8644/9536/873/2878/2882/1558/493869/2876/8529/5319/2877/1555/1559	16
hsa04066	HIF-1 signaling pathway	23/708	109/8104	5.1992e-05	0.000577502	0.000432027	3939/2597/226/6194/3479/229/5162/2027/4055/5230/2023/1906/6923/5595/3945/1956/7037/1026/5214/7018/7076/2026/2321	23
hsa04512	ECM-receptor interaction	20/708	88/8104	5.26652e-05	0.000577502	0.000432027	2335/1284/3675/3694/7057/3673/255743/3685/1282/3909/3911/7448/3918/3913/3914/1291/3688/6382/1287/3912	20
hsa00350	Tyrosine metabolism	11/708	36/8104	0.000164301	0.00174159	0.00130288	3242/2805/3081/316/2184/2806/124/6898/125/4128/1644	11
hsa04976	Bile secretion	19/708	89/8104	0.000195193	0.00200231	0.00149792	2778/7363/366/10599/5244/2052/54657/570/949/6822/481/8431/9971/483/1244/476/6554/486/7364	19
hsa05133	Pertussis	17/708	76/8104	0.000232206	0.00230754	0.00172627	716/725/1072/722/718/801/387/715/710/929/805/808/727/5595/3725/3688/2353	17
hsa04142	Lysosome	24/708	128/8104	0.000252019	0.00242855	0.00181679	967/537/9516/5660/8763/2720/3920/3423/9741/3916/1508/1212/1510/1512/1509/1514/1075/55353/5476/4074/3074/6272/533/10053	24
hsa04979	Cholesterol metabolism	13/708	50/8104	0.000261549	0.00244625	0.00183003	350/341/348/7417/7416/336/4035/949/345/19/337/6272/27329	13
hsa05205	Proteoglycans in cancer	33/708	205/8104	0.000397682	0.00361323	0.00270304	967/60/998/71/5499/6194/3479/387/2335/1655/1499/7057/595/3673/5595/2316/3685/858/8826/2066/1956/7448/1514/7430/1026/3688/2719/3481/6382/2317/857/4060/2318	33
hsa05146	Amoebiasis	20/708	102/8104	0.000442582	0.00390947	0.00292466	735/2778/733/5052/2335/731/1284/929/732/1282/3909/3911/5272/3918/3913/3914/3315/2767/1287/3912	20
hsa05022	Pathways of neurodegeneration - multiple diseases	63/708	476/8104	0.000463162	0.00398069	0.00297794	4541/27089/5861/801/6647/506/7417/4538/6233/1499/518/847/4508/516/4725/805/7388/4519/823/4513/824/6390/7846/4514/808/10540/4539/4537/5693/522/4706/4512/7384/6389/4540/7416/4535/4720/8878/5595/7386/5690/1346/56901/2878/351/598/2882/5621/493869/2876/1639/2877/498/7316/7385/203068/2521/9246/22943/1327/347733/5606	63
hsa00620	Pyruvate metabolism	12/708	47/8104	0.000536985	0.00449371	0.00336173	3939/5162/4190/38/4191/224/3945/124/5105/125/5315/197257	12
hsa00140	Steroid hormone biosynthesis	14/708	61/8104	0.000617023	0.00491058	0.00367359	8630/7363/3290/1571/1645/54657/1646/8644/1109/1577/1551/1543/3283/7364	14
hsa03320	PPAR signaling pathway	16/708	75/8104	0.000617684	0.00491058	0.00367359	3158/1582/123/2180/336/34/345/2182/2181/8310/2168/5105/2169/7316/4973/2173	16
hsa00020	Citrate cycle (TCA cycle)	9/708	30/8104	0.00075118	0.00582623	0.00435858	3417/5162/4190/6390/3418/6389/4191/5105/48	9
hsa05222	Small cell lung cancer	18/708	92/8104	0.000864581	0.00654611	0.00489712	2335/1284/3675/595/3673/3685/1282/3909/3911/3918/598/3913/3914/1026/3688/1647/1287/3912	18
hsa04975	Fat digestion and absorption	11/708	43/8104	0.000893401	0.00660701	0.00494269	38/8611/5320/2806/949/19/2168/2169/5319/29881/337	11
hsa00270	Cysteine and methionine metabolism	12/708	50/8104	0.00097811	0.00691198	0.00517083	3939/2805/4190/4191/2806/3945/1036/23743/4144/6898/23382/10993	12
hsa05110	Vibrio cholerae infection	12/708	50/8104	0.00097811	0.00691198	0.00517083	60/375/71/2778/9296/537/9550/8992/10945/11014/533/529	12
hsa05010	Alzheimer disease	51/708	384/8104	0.00147921	0.0102259	0.00764993	4541/2597/27089/801/506/57142/348/7417/4538/1499/518/4508/516/4725/805/7388/4519/823/4513/824/6390/7846/4514/808/4539/4537/5693/522/4706/4512/7384/6389/4540/7416/4535/4035/4720/5595/7386/5690/1346/56901/351/283375/498/7385/203068/64116/22943/1327/347733	51
hsa00220	Arginine biosynthesis	7/708	22/8104	0.00199972	0.01353	0.0101217	2805/445/1373/5009/2806/27165/2752	7
hsa00360	Phenylalanine metabolism	6/708	17/8104	0.00232522	0.0154046	0.0115241	3242/2805/2806/6898/4128/1644	6
hsa05100	Bacterial invasion of epithelial cells	15/708	77/8104	0.00237591	0.0154192	0.011535	4735/60/998/71/387/10109/2335/1499/858/1212/6464/391/10095/3688/857	15
hsa04964	Proximal tubule bicarbonate reclamation	7/708	23/8104	0.00266118	0.0169251	0.0126616	4190/481/483/5105/476/486/27165	7
hsa05132	Salmonella infection	35/708	249/8104	0.0031503	0.019643	0.0146949	2597/60/375/998/71/103910/6188/387/10109/1499/929/5216/7295/7846/10540/79026/6281/5595/2316/302/6990/8795/391/3725/10095/3320/1639/2353/2317/10398/4074/203068/2318/347733/5606	35
hsa00030	Pentose phosphate pathway	8/708	30/8104	0.00336403	0.0201842	0.0150997	226/229/5236/5226/2203/5214/7086/6888	8
hsa00630	Glyoxylate and dicarboxylate metabolism	8/708	30/8104	0.00336403	0.0201842	0.0150997	847/4190/38/54363/4191/189/48/2752	8
hsa04151	PI3K-Akt signaling pathway	46/708	354/8104	0.00381452	0.0224633	0.0168047	7534/6194/3479/2335/1284/118788/2783/3675/3694/7057/2787/595/3673/5595/2782/2264/3685/2538/5154/1282/3909/2066/3911/2069/10971/1956/7529/7448/3918/117145/598/5105/3913/3914/23533/3320/1026/5515/1291/3688/3481/3561/374/2321/1287/3912	46
hsa04146	Peroxisome	15/708	82/8104	0.00446146	0.0257954	0.0192974	6647/3417/5052/847/6648/54363/2180/3418/570/2182/2181/8310/189/10455/5264	15
hsa04918	Thyroid hormone synthesis	14/708	75/8104	0.00490433	0.0278496	0.0208342	2778/213/433/6906/7276/481/2878/483/2882/476/493869/2876/2877/486	14
hsa04974	Protein digestion and absorption	17/708	103/8104	0.00754007	0.0419136	0.0313555	1361/1284/481/1308/1282/9056/483/476/59272/1291/1803/6520/486/3783/23428/54407/1287	17
hsa00040	Pentose and glucuronate interconversions	8/708	34/8104	0.00764463	0.0419136	0.0313555	7363/51084/54657/51181/7358/57016/231/7364	8
hsa04810	Regulation of actin cytoskeleton	30/708	218/8104	0.00811285	0.0437269	0.0327119	1072/60/7114/998/71/5499/103910/387/10109/2335/3827/5216/4627/3675/3694/7852/3673/5595/2264/3685/8826/5154/1956/10458/5880/10095/7430/3688/2934/10398	30
hsa05150	Staphylococcus aureus infection	16/708	96/8104	0.00854191	0.0452721	0.0338679	3075/716/718/2266/715/10747/3426/727/3880/3127/3875/3123/5340/1672/3383/192666	16
hsa00380	Tryptophan metabolism	9/708	42/8104	0.00908428	0.0473574	0.0354279	1892/847/38/316/224/4128/1543/130013/1644	9
hsa01212	Fatty acid metabolism	11/708	57/8104	0.00933577	0.0478834	0.0358214	1892/38/10449/2180/37/34/2182/2181/8310/60481/3032	11
hsa04670	Leukocyte transendothelial migration	18/708	114/8104	0.00961498	0.0485328	0.0363072	60/998/71/103910/387/1499/7852/1535/1500/9074/1366/5880/7430/3688/10398/9076/3383/1364	18
hsa05410	Hypertrophic cardiomyopathy	15/708	90/8104	0.0106901	0.0531165	0.0397363	7170/60/71/3479/3675/7168/3694/1906/3673/4000/3685/183/3688/7169/7171	15
hsa00330	Arginine and proline metabolism	10/708	51/8104	0.011555	0.0565304	0.0422902	2805/2806/1152/224/6303/84735/8974/4128/54498/4953	10
hsa05130	Pathogenic Escherichia coli infection	27/708	197/8104	0.012252	0.0590325	0.044162	2597/60/5861/375/998/71/6188/387/10109/7846/4691/4627/7009/5595/9074/10458/1366/8795/3725/10095/7430/3688/2353/203068/9076/1364/347733	27
hsa00250	Alanine, aspartate and glutamate metabolism	8/708	37/8104	0.012887	0.0611653	0.0457576	2805/445/1373/2806/189/80150/27165/2752	8
hsa04961	Endocrine and other factor-regulated calcium reabsorption	10/708	53/8104	0.0150626	0.0704396	0.0526956	1173/2778/481/1212/1175/483/476/486/8766/793	10
hsa04932	Non-alcoholic fatty liver disease	22/708	155/8104	0.0153858	0.0709084	0.0530463	27089/998/4725/7388/4519/4513/1571/6390/4514/4706/4512/7384/6389/4720/7386/1346/56901/3953/3725/2353/7385/1327	22
hsa05414	Dilated cardiomyopathy	15/708	96/8104	0.0187819	0.0853233	0.0638301	7170/60/71/2778/3479/3675/7168/3694/3673/4000/3685/183/3688/7169/7171	15
hsa04520	Adherens junction	12/708	71/8104	0.0190757	0.0854377	0.0639156	60/998/71/387/1499/5595/1500/8826/1956/10458/5880/81607	12
hsa01210	2-Oxocarboxylic acid metabolism	5/708	19/8104	0.0207507	0.0915584	0.0684945	2805/3417/3418/2806/48	5
hsa04530	Tight junction	23/708	169/8104	0.021318	0.0915584	0.0684945	4637/60/998/71/103910/387/10109/7846/4627/595/3308/9074/3993/1366/3725/10095/7430/5515/3688/10398/91862/9076/1364	23
hsa00280	Valine, leucine and isoleucine degradation	9/708	48/8104	0.0213956	0.0915584	0.0684945	1892/3158/38/10449/316/34/224/11112/3032	9
hsa00051	Fructose and mannose metabolism	7/708	33/8104	0.021594	0.0915584	0.0684945	7167/226/229/57016/2203/5214/231	7
hsa05214	Glioma	12/708	75/8104	0.0283233	0.118511	0.0886574	801/3479/805/808/595/5595/1029/5154/1956/6464/1026/1647	12
hsa05323	Rheumatoid arthritis	14/708	93/8104	0.0303581	0.125375	0.0937925	9296/537/9550/8992/1514/3127/3725/3123/2353/3383/533/2321/6364/529	14
hsa04971	Gastric acid secretion	12/708	76/8104	0.0310703	0.126469	0.0946107	60/71/2778/801/805/808/887/481/483/476/7430/3773	12
hsa00770	Pantothenate and CoA biosynthesis	5/708	21/8104	0.0314183	0.126469	0.0946107	224/5167/8876/8875/53354	5
hsa05416	Viral myocarditis	10/708	60/8104	0.0336515	0.133765	0.100069	60/71/595/1981/5880/3127/3106/3123/3383/857	10
hsa05417	Lipid and atherosclerosis	27/708	215/8104	0.0342725	0.134551	0.100657	998/801/387/3929/6648/929/805/808/1535/5595/19/3308/598/8795/1558/3725/3320/2353/3329/1555/1543/4780/337/3383/1559/4973/5606	27
hsa05225	Hepatocellular carcinoma	22/708	168/8104	0.035228	0.136616	0.102202	60/4257/71/1499/1728/595/5595/2950/1029/1956/6464/2938/598/1026/2948/2939/6599/3481/1647/7296/4780/2941	22
hsa00591	Linoleic acid metabolism	6/708	29/8104	0.0363526	0.139279	0.104194	1571/5320/11145/1558/5319/1559	6
hsa00340	Histidine metabolism	5/708	22/8104	0.037831	0.143217	0.10714	144193/224/84735/3176/4128	5
hsa04960	Aldosterone-regulated sodium reabsorption	7/708	37/8104	0.0384819	0.143968	0.107702	3479/5595/2810/481/483/476/486	7
hsa05230	Central carbon metabolism in cancer	11/708	70/8104	0.0391752	0.144496	0.108097	3939/3417/5162/3418/5223/5595/3945/1956/5214/27165/5315	11
hsa05131	Shigellosis	30/708	247/8104	0.0395318	0.144496	0.108097	4735/718/60/3020/375/998/3021/71/103910/387/10109/6233/664/929/5216/831/823/824/7416/8878/5595/826/1956/598/3725/10095/3688/10398/7316/7094	30
hsa00983	Drug metabolism - other enzymes	12/708	80/8104	0.0439786	0.158923	0.11889	4257/7363/1571/54657/2950/4833/2938/2948/2939/8824/7364/2941	12
hsa04922	Glucagon signaling pathway	15/708	107/8104	0.0446623	0.15958	0.119381	3939/2778/801/5162/805/808/5223/2538/3945/3276/5105/2203/5214/5836/5315	15
hsa00052	Galactose metabolism	6/708	31/8104	0.0486272	0.168417	0.125992	5236/2720/2538/57016/5214/231	6
hsa04210	Apoptosis	18/708	136/8104	0.0487243	0.168417	0.125992	60/71/823/824/7846/5595/4000/1508/1512/1509/598/1514/8795/3725/1075/2353/1647/9131	18
hsa05322	Systemic lupus erythematosus	18/708	136/8104	0.0487243	0.168417	0.125992	716/718/735/3020/3021/6628/733/729/715/731/732/727/3015/8365/3127/8294/3123/8364	18
hsa01524	Platinum drug resistance	11/708	73/8104	0.0509308	0.172298	0.128896	4257/5595/2950/1029/2938/598/1244/1026/2948/2939/2941	11
hsa04115	p53 signaling pathway	11/708	73/8104	0.0509308	0.172298	0.128896	3479/7057/595/2810/1029/64065/598/8795/901/1026/1647	11
hsa00910	Nitrogen metabolism	4/708	17/8104	0.0549244	0.183852	0.137539	1373/771/768/2752	4
hsa04350	TGF-beta signaling pathway	13/708	94/8104	0.0642861	0.211319	0.158087	387/7057/2200/5595/3397/4093/2331/148738/4681/100532736/7050/5515/57817	13
hsa00130	Ubiquinone and other terpenoid-quinone biosynthesis	3/708	11/8104	0.0644589	0.211319	0.158087	3242/1728/6898	3
hsa05165	Human papillomavirus infection	37/708	331/8104	0.069487	0.2226	0.166527	998/2778/9296/537/2335/1499/1284/9550/10134/8992/3675/3694/7057/595/3673/5595/3685/3993/1282/3909/3911/1956/7448/3918/3913/3914/3106/1026/5515/1291/3688/3280/5315/533/529/1287/3912	37
hsa05210	Colorectal cancer	12/708	86/8104	0.069632	0.2226	0.166527	387/1499/595/5595/2069/1956/5880/3725/1026/2353/1647/374	12
hsa05412	Arrhythmogenic right ventricular cardiomyopathy	11/708	77/8104	0.0700001	0.2226	0.166527	60/71/1499/3675/3694/3673/3728/4000/3685/3688/1832	11
hsa00790	Folate biosynthesis	5/708	26/8104	0.0709788	0.223478	0.167183	8644/873/57016/5092/231	5
hsa04270	Vascular smooth muscle contraction	17/708	134/8104	0.0748991	0.233509	0.174687	4637/2778/801/5499/387/805/808/4627/5320/1906/5595/183/185/5319/10398/2767/10267	17
hsa00062	Fatty acid elongation	5/708	27/8104	0.0811403	0.250511	0.187406	1892/10449/117145/60481/3032	5
hsa00500	Starch and sucrose metabolism	6/708	36/8104	0.0892914	0.273025	0.204249	5236/5167/2538/2632/57733/5836	6
hsa04933	AGE-RAGE signaling pathway in diabetic complications	13/708	100/8104	0.0946408	0.286626	0.214424	998/2335/1284/1906/595/5595/183/1282/185/1958/3725/3383/1287	13
hsa05216	Thyroid cancer	6/708	37/8104	0.0991254	0.297376	0.222466	7170/1499/595/5595/1026/1647	6
hsa04261	Adrenergic signaling in cardiomyocytes	18/708	150/8104	0.103191	0.30668	0.229427	7170/2778/801/5499/805/808/7168/5595/481/183/185/483/476/23533/5515/7169/486/7171	18
hsa04912	GnRH signaling pathway	12/708	93/8104	0.10987	0.323506	0.242013	998/2778/801/805/808/5595/1956/1958/3725/2767/4323/5606	12
hsa00053	Ascorbate and aldarate metabolism	5/708	30/8104	0.115915	0.338173	0.252986	7363/54657/224/7358/7364	5
hsa04611	Platelet activation	15/708	124/8104	0.122237	0.353376	0.264359	60/2243/2266/2244/71/2778/5499/103910/387/3673/5595/23533/8673/3688/7094	15
hsa04921	Oxytocin signaling pathway	18/708	154/8104	0.12385	0.354814	0.265435	4637/60/71/2778/801/5499/387/805/808/595/5595/1956/1938/3725/23533/1026/2353/10398	18
hsa00410	beta-Alanine metabolism	5/708	31/8104	0.128855	0.365855	0.273695	1892/224/8310/84735/54498	5
hsa05140	Leishmaniasis	10/708	77/8104	0.132062	0.371643	0.278025	718/1915/1535/5595/3127/3725/3123/3688/2353/65108	10
hsa04218	Cellular senescence	18/708	156/8104	0.135038	0.375437	0.280863	801/5499/7417/805/823/824/808/677/7416/595/8878/5595/1029/5928/3106/1026/1647/5606	18
hsa04614	Renin-angiotensin system	4/708	23/8104	0.135771	0.375437	0.280863	183/185/59272/5476	4
hsa05219	Bladder cancer	6/708	41/8104	0.143774	0.392043	0.293286	7057/595/5595/1029/1956/1026	6
hsa05031	Amphetamine addiction	9/708	69/8104	0.145178	0.392043	0.293286	2778/801/5499/805/808/3725/2353/4128/1644	9
hsa04925	Aldosterone synthesis and secretion	12/708	98/8104	0.145475	0.392043	0.293286	2778/801/805/808/949/481/183/185/483/476/2767/3283	12
hsa04015	Rap1 signaling pathway	23/708	210/8104	0.151897	0.405911	0.30366	60/998/71/2778/801/3479/387/1499/5216/805/808/7057/5595/2264/1500/5154/3397/1956/5880/3688/7094/2321/5606	23
hsa05120	Epithelial cell signaling in Helicobacter pylori infection	9/708	70/8104	0.15456	0.409585	0.306409	998/9296/537/9550/8992/1956/3725/533/529	9
hsa00592	alpha-Linolenic acid metabolism	4/708	25/8104	0.169639	0.445828	0.333522	5320/11145/8310/5319	4
hsa05145	Toxoplasmosis	13/708	112/8104	0.177666	0.463098	0.346442	5595/3909/3911/3918/598/3913/3127/3914/23533/3123/3688/5606/3912	13
hsa00120	Primary bile acid biosynthesis	3/708	17/8104	0.181043	0.464287	0.347332	1582/570/1109	3
hsa00450	Selenocompound metabolism	3/708	17/8104	0.181043	0.464287	0.347332	9060/9061/7296	3
hsa00760	Nicotinate and nicotinamide metabolism	5/708	35/8104	0.186477	0.470793	0.352199	4837/316/5167/4907/23530	5
hsa04970	Salivary secretion	11/708	93/8104	0.186541	0.470793	0.352199	2778/801/805/808/481/1471/483/476/1469/486/3783	11
hsa00061	Fatty acid biosynthesis	3/708	18/8104	0.204068	0.508538	0.380435	2180/2182/2181	3
hsa04966	Collecting duct acid secretion	4/708	27/8104	0.206088	0.508538	0.380435	9296/9550/8992/529	4
hsa04022	cGMP-PKG signaling pathway	18/708	167/8104	0.206294	0.508538	0.380435	801/5499/387/7417/3827/805/808/7416/5595/481/185/483/476/23533/10398/486/2767/3764	18
hsa05135	Yersinia infection	15/708	137/8104	0.214937	0.517232	0.386939	60/998/71/387/10109/2335/5595/10458/5880/391/3725/10095/3688/2353/5606	15
hsa00920	Sulfur metabolism	2/708	10/8104	0.21539	0.517232	0.386939	9060/9061	2
hsa05212	Pancreatic cancer	9/708	76/8104	0.216571	0.517232	0.386939	998/595/5595/1029/1956/598/5880/1026/1647	9
hsa05143	African trypanosomiasis	5/708	37/8104	0.21825	0.517232	0.386939	3827/3250/2150/3383/8542	5
hsa04723	Retrograde endocannabinoid signaling	16/708	148/8104	0.219953	0.517232	0.386939	4541/11343/4538/4725/2783/4539/4537/4706/4540/4535/4720/2787/5595/2782/56901/2562	16
hsa04613	Neutrophil extracellular trap formation	20/708	190/8104	0.220872	0.517232	0.386939	718/60/2243/3020/2266/3021/2244/71/7417/366/3146/7416/1535/727/5595/3015/8365/5880/8294/8364	20
hsa04915	Estrogen signaling pathway	15/708	138/8104	0.223129	0.517232	0.386939	2778/801/805/808/5595/7031/3880/1956/1509/6464/3875/3725/3320/2353/192666	15
hsa04666	Fc gamma R-mediated phagocytosis	11/708	97/8104	0.224824	0.517232	0.386939	1072/998/10109/8611/5595/4082/5880/10095/2934/65108/274	11
hsa00650	Butanoate metabolism	4/708	28/8104	0.225097	0.517232	0.386939	1892/3158/38/348158	4
hsa05134	Legionellosis	7/708	57/8104	0.22723	0.517232	0.386939	718/5861/375/1915/664/929/3329	7
hsa00531	Glycosaminoglycan degradation	3/708	19/8104	0.227712	0.517232	0.386939	2720/3423/3074	3
hsa04750	Inflammatory mediator regulation of TRP channels	11/708	98/8104	0.234856	0.529676	0.396249	2778/801/5499/3479/3827/805/808/3556/79054/2150/5606	11
hsa04744	Phototransduction	4/708	29/8104	0.244532	0.54467	0.407465	801/805/808/2782	4
hsa05203	Viral carcinogenesis	21/708	204/8104	0.24493	0.54467	0.407465	7534/718/3249/998/387/3190/4055/595/5595/1029/8365/10971/7529/3725/3106/8294/1026/3572/2934/5315/8364	21
hsa04140	Autophagy - animal	15/708	141/8104	0.248479	0.545929	0.408407	5861/664/3920/3146/3916/8878/5595/1508/1509/598/1514/81671/8673/5515/23192	15
hsa00430	Taurine and hypotaurine metabolism	2/708	11/8104	0.24893	0.545929	0.408407	570/1036	2
hsa04924	Renin secretion	8/708	69/8104	0.252871	0.549556	0.411121	2778/801/805/808/1906/1508/183/185	8
hsa00565	Ether lipid metabolism	6/708	49/8104	0.25404	0.549556	0.411121	8611/5320/11145/9514/5319/23646	6
hsa04936	Alcoholic liver disease	15/708	142/8104	0.257169	0.552565	0.413372	718/3929/1499/929/1571/37/727/34/595/224/124/8310/2168/125/5606	15
hsa00260	Glycine, serine and threonine metabolism	5/708	40/8104	0.268635	0.573328	0.428905	5223/189/27232/4128/10993	5
hsa00561	Glycerolipid metabolism	7/708	61/8104	0.28195	0.597734	0.447163	11343/8611/224/57016/57678/231/57104	7
hsa04913	Ovarian steroidogenesis	6/708	51/8104	0.28469	0.599546	0.448518	2778/3479/8644/949/1543/3283	6
hsa05218	Melanoma	8/708	72/8104	0.291454	0.609751	0.456153	3479/595/5595/1029/5154/1956/1026/1647	8
hsa04726	Serotonergic synapse	12/708	115/8104	0.30251	0.628746	0.470363	2778/2783/2787/5595/2782/1562/351/1558/4128/2562/1559/1644	12
hsa00640	Propanoate metabolism	4/708	32/8104	0.304669	0.629122	0.470644	3939/1892/3945/8310	4
hsa03450	Non-homologous end-joining	2/708	13/8104	0.316137	0.646495	0.483641	2547/7520	2
hsa04928	Parathyroid hormone synthesis, secretion and action	11/708	106/8104	0.32034	0.646495	0.483641	2778/387/5595/3727/1956/1958/1026/2353/2625/2767/4323	11
hsa00860	Porphyrin and chlorophyll metabolism	5/708	43/8104	0.321215	0.646495	0.483641	1356/7363/54657/9843/7364	5
hsa04940	Type I diabetes mellitus	5/708	43/8104	0.321215	0.646495	0.483641	1363/3127/3106/3123/3329	5
hsa05167	Kaposi sarcoma-associated herpesvirus infection	19/708	194/8104	0.334548	0.668821	0.500343	718/801/6233/1499/805/2783/808/2787/595/5595/2782/3725/3106/23533/1026/3572/2353/7316/3383	19
hsa04926	Relaxin signaling pathway	13/708	129/8104	0.336514	0.668821	0.500343	2778/1284/2783/1906/2787/5595/2782/1282/1956/6464/3725/2353/1287	13
hsa01522	Endocrine resistance	10/708	98/8104	0.351849	0.694956	0.519895	2778/3479/595/5595/1029/1956/6464/3725/1026/2353	10
hsa04068	FoxO signaling pathway	13/708	131/8104	0.357172	0.701115	0.524502	3479/664/847/6648/595/5595/2538/1956/3276/5105/901/1026/1647	13
hsa05034	Alcoholism	18/708	187/8104	0.36854	0.717047	0.536421	3020/3021/2778/801/5499/805/2783/808/2787/5595/2782/3015/8365/6464/8294/4128/8364/1644	18
hsa04612	Antigen processing and presentation	8/708	78/8104	0.372053	0.717047	0.536421	567/1508/3308/1514/3127/3106/3320/3123	8
hsa04721	Synaptic vesicle cycle	8/708	78/8104	0.372053	0.717047	0.536421	1173/9296/9550/8992/1212/1175/533/529	8
hsa01240	Biosynthesis of cofactors	15/708	155/8104	0.378171	0.72247	0.540477	8630/3242/7363/1728/54657/224/204/7358/4833/4144/195814/1503/53354/5315/7364	15
hsa00604	Glycosphingolipid biosynthesis - ganglio series	2/708	15/8104	0.381885	0.72247	0.540477	2720/3074	2
hsa01521	EGFR tyrosine kinase inhibitor resistance	8/708	79/8104	0.385722	0.72247	0.540477	6194/3479/5595/5154/1956/6464/598/558	8
hsa03018	RNA degradation	8/708	79/8104	0.385722	0.72247	0.540477	2027/2023/26986/25804/3313/5214/3329/2026	8
hsa00512	Mucin type O-glycan biosynthesis	4/708	36/8104	0.386639	0.72247	0.540477	2589/9245/11226/55808	4
hsa04973	Carbohydrate digestion and absorption	5/708	47/8104	0.392732	0.72247	0.540477	481/2538/483/476/486	5
hsa05170	Human immunodeficiency virus 1 infection	20/708	212/8104	0.393042	0.72247	0.540477	567/1072/801/805/2783/808/7852/2787/684/6923/5595/2782/598/5880/3725/3106/2353/2767/10053/5606	20
hsa05207	Chemical carcinogenesis - receptor activation	20/708	212/8104	0.393042	0.72247	0.540477	4257/2778/7363/2052/54657/595/5595/1956/2938/54852/3725/3320/688/2948/2939/2353/1555/1543/7364/2941	20
hsa05213	Endometrial cancer	6/708	58/8104	0.396232	0.724149	0.541733	1499/595/5595/1956/1026/1647	6
hsa04972	Pancreatic secretion	10/708	102/8104	0.400092	0.727024	0.543884	2778/1361/387/5320/481/483/476/5319/486/8766	10
hsa05152	Tuberculosis	17/708	180/8104	0.405063	0.731876	0.547514	718/801/537/387/3929/929/805/808/3920/3916/5595/3313/1509/3127/3123/3329/533	17
hsa03040	Spliceosome	14/708	147/8104	0.408503	0.733921	0.549044	6628/6633/1655/3190/6635/9939/25804/27316/6426/3183/23451/3178/4670/2521	14
hsa04217	Necroptosis	15/708	159/8104	0.417169	0.745279	0.557541	2512/5478/7417/823/824/2495/3146/7416/8878/3015/8795/3320/9131/5836/2752	15
hsa01040	Biosynthesis of unsaturated fatty acids	3/708	27/8104	0.423874	0.753028	0.563338	570/8310/60481	3
hsa04672	Intestinal immune network for IgA production	5/708	49/8104	0.428391	0.753342	0.563573	5284/4055/7852/3127/3123	5
hsa04514	Cell adhesion molecules	14/708	149/8104	0.428789	0.753342	0.563573	3685/9074/1462/214/1366/3127/3106/3123/3688/6382/9076/3383/1364/9019	14
hsa04371	Apelin signaling pathway	13/708	139/8104	0.441202	0.764932	0.572243	801/6194/805/2783/808/2787/595/5595/2782/185/1958/23533/100506013	13
hsa04137	Mitophagy - animal	7/708	72/8104	0.442417	0.764932	0.572243	6233/664/8878/598/3725/7316/665	7
hsa00510	N-Glycan biosynthesis	5/708	50/8104	0.446073	0.764932	0.572243	6480/10195/6184/23193/1650	5
hsa05144	Malaria	5/708	50/8104	0.446073	0.764932	0.572243	7057/4035/2995/6382/3383	5
hsa00513	Various types of N-glycan biosynthesis	4/708	39/8104	0.447413	0.764932	0.572243	10195/6184/1650/3074	4
hsa04014	Ras signaling pathway	21/708	232/8104	0.46604	0.785378	0.587539	998/801/3479/387/805/2783/808/5320/11145/2787/5595/2782/2264/5154/1956/6464/598/5880/5319/3481/2321	21
hsa04012	ErbB signaling pathway	8/708	85/8104	0.467598	0.785378	0.587539	5595/2066/2069/1956/6464/3725/1026/374	8
hsa04722	Neurotrophin signaling pathway	11/708	119/8104	0.468934	0.785378	0.587539	998/801/387/805/808/27018/5595/6464/3725/9500/6272	11
hsa04659	Th17 cell differentiation	10/708	108/8104	0.47264	0.785378	0.587539	3556/5595/3127/3725/3320/3572/3123/2353/2625/3561	10
hsa00511	Other glycan degradation	2/708	18/8104	0.474874	0.785378	0.587539	2720/3074	2
hsa04713	Circadian entrainment	9/708	97/8104	0.47666	0.785378	0.587539	2778/801/805/2783/808/2787/5595/2782/2353	9
hsa05215	Prostate cancer	9/708	97/8104	0.47666	0.785378	0.587539	3479/1499/595/5595/2950/5154/1956/3320/1026	9
hsa04728	Dopaminergic synapse	12/708	132/8104	0.487291	0.798015	0.596993	2778/801/5499/805/2783/808/2787/2782/5515/2353/4128/1644	12
hsa04919	Thyroid hormone signaling pathway	11/708	121/8104	0.491706	0.798015	0.596993	60/71/1499/595/5595/481/3685/483/476/5214/486	11
hsa05220	Chronic myeloid leukemia	7/708	76/8104	0.500318	0.798015	0.596993	595/5595/1029/6464/598/1026/1647	7
hsa05163	Human cytomegalovirus infection	20/708	225/8104	0.502498	0.798015	0.596993	567/2778/801/387/1499/805/2783/808/7852/2787/595/5595/2782/3685/1029/1956/5880/3106/1026/2767	20
hsa04010	MAPK signaling pathway	26/708	294/8104	0.504773	0.798015	0.596993	998/3479/929/3925/3556/5595/2316/2264/3727/5154/2066/2069/1956/5880/3725/2353/3481/2317/1647/3315/11221/374/1848/2321/2318/5606	26
hsa04927	Cortisol synthesis and secretion	6/708	65/8104	0.507075	0.798015	0.596993	2778/949/183/185/2767/3283	6
hsa05321	Inflammatory bowel disease	6/708	65/8104	0.507075	0.798015	0.596993	3127/3725/3123/2625/3561/4094	6
hsa04540	Gap junction	8/708	88/8104	0.507757	0.798015	0.596993	2778/7846/5595/5154/1956/2767/203068/347733	8
hsa04390	Hippo signaling pathway	14/708	157/8104	0.509425	0.798015	0.596993	7534/60/71/5499/1499/174/595/3993/3397/10971/7529/55233/5515/374	14
hsa05160	Hepatitis C	14/708	157/8104	0.509425	0.798015	0.596993	7534/1499/595/5595/949/9074/10971/1956/7529/1366/1026/5515/9076/1364	14
hsa05202	Transcriptional misregulation in cancer	17/708	192/8104	0.514659	0.802263	0.60017	3020/3021/3479/1655/929/8842/3728/5154/598/1026/3248/1647/1848/2521/2321/64332/4094	17
hsa04360	Axon guidance	16/708	182/8104	0.52843	0.81971	0.613223	1072/998/103910/387/7852/1948/5595/5880/10512/9353/3688/22885/7869/10398/8482/23654	16
hsa00100	Steroid biosynthesis	2/708	20/8104	0.531965	0.821188	0.614328	7108/6307	2
hsa04910	Insulin signaling pathway	12/708	137/8104	0.540855	0.830879	0.621578	801/5499/6194/805/808/5595/2538/6464/5105/2203/5836/5573	12
hsa04962	Vasopressin-regulated water reabsorption	4/708	44/8104	0.543761	0.831327	0.621913	2778/10540/1639/8766	4
hsa04658	Th1 and Th2 cell differentiation	8/708	92/8104	0.559682	0.851014	0.636641	5595/3127/3725/3123/2353/2625/3561/4094	8
hsa02010	ABC transporters	4/708	45/8104	0.561991	0.851014	0.636641	5244/19/1244/1672	4
hsa04920	Adipocytokine signaling pathway	6/708	69/8104	0.567056	0.854615	0.639335	2180/2182/2538/2181/5105/3953	6
hsa05166	Human T-cell leukemia virus 1 infection	19/708	222/8104	0.5735	0.86025	0.64355	567/7417/5901/4055/7416/595/5595/1029/1958/598/3127/3725/3106/1026/3123/2353/3561/3383/7094	19
hsa03020	RNA polymerase	3/708	34/8104	0.580644	0.864887	0.647019	5441/5430/5434	3
hsa00900	Terpenoid backbone biosynthesis	2/708	22/8104	0.584667	0.864887	0.647019	3158/38	2
hsa04657	IL-17 signaling pathway	8/708	94/8104	0.58475	0.864887	0.647019	5595/6426/3727/3725/3934/3320/2353/6364	8
hsa03060	Protein export	2/708	23/8104	0.609324	0.887369	0.663838	6727/6726	2
hsa05223	Non-small cell lung cancer	6/708	72/8104	0.609624	0.887369	0.663838	595/5595/1029/1956/1026/1647	6
hsa04152	AMPK signaling pathway	10/708	120/8104	0.6103	0.887369	0.663838	10890/3479/595/2538/5105/3953/1938/2203/5515/5214	10
hsa04730	Long-term depression	5/708	60/8104	0.611113	0.887369	0.663838	2778/3479/5595/5515/2767	5
hsa04144	Endocytosis	21/708	252/8104	0.624467	0.888492	0.664678	375/998/1173/10890/832/387/10109/7852/2264/858/1212/1175/1956/7037/10095/3106/2348/3561/857/274/8766	21
hsa00520	Amino sugar and nucleotide sugar metabolism	4/708	49/8104	0.6307	0.888492	0.664678	5236/1727/7358/3074	4
hsa00600	Sphingolipid metabolism	4/708	49/8104	0.6307	0.888492	0.664678	5660/2720/8611/9514	4
hsa05030	Cocaine addiction	4/708	49/8104	0.6307	0.888492	0.664678	2778/3725/4128/1644	4
hsa00564	Glycerophospholipid metabolism	8/708	98/8104	0.632742	0.888492	0.664678	8611/5320/11145/57678/5319/23646/10400/55224	8
hsa05231	Choline metabolism in cancer	8/708	98/8104	0.632742	0.888492	0.664678	8611/5595/57153/5154/1956/5880/3725/2353	8
hsa04977	Vitamin digestion and absorption	2/708	24/8104	0.632851	0.888492	0.664678	949/337	2
hsa04911	Insulin secretion	7/708	86/8104	0.634238	0.888492	0.664678	2778/481/483/476/486/2767/3783	7
hsa04640	Hematopoietic cell lineage	8/708	99/8104	0.644251	0.898561	0.67221	929/100133941/3675/3673/966/7037/3127/3123	8
hsa04668	TNF signaling pathway	9/708	112/8104	0.653517	0.904681	0.676789	1906/5595/3726/3725/2353/3383/4323/6364/5606	9
hsa00310	Lysine degradation	5/708	63/8104	0.654735	0.904681	0.676789	1892/38/5352/224/5351	5
hsa05330	Allograft rejection	3/708	38/8104	0.657174	0.904681	0.676789	3127/3106/3123	3
hsa04727	GABAergic synapse	7/708	89/8104	0.670195	0.918629	0.687224	2783/2787/2782/27165/2562/2752/54407	7
hsa04950	Maturity onset diabetes of the young	2/708	26/8104	0.676553	0.920727	0.688793	3280/222546	2
hsa05142	Chagas disease	8/708	102/8104	0.677516	0.920727	0.688793	718/2778/3827/5595/3725/5515/2353/2767	8
hsa04720	Long-term potentiation	5/708	67/8104	0.707814	0.953749	0.713496	801/5499/805/808/5595	5
hsa05221	Acute myeloid leukemia	5/708	67/8104	0.707814	0.953749	0.713496	929/595/5595/3728/1848	5
hsa04934	Cushing syndrome	12/708	155/8104	0.712469	0.955471	0.714785	2778/1499/595/5595/949/1029/183/1956/185/1026/2767/3283	12
hsa04114	Oocyte meiosis	10/708	131/8104	0.718867	0.955471	0.714785	7534/801/5499/3479/805/808/5595/10971/7529/5515	10
hsa05332	Graft-versus-host disease	3/708	42/8104	0.723116	0.955471	0.714785	3127/3106/3123	3
hsa05211	Renal cell carcinoma	5/708	69/8104	0.73211	0.955471	0.714785	998/6923/5595/3725/1026	5
hsa04024	cAMP signaling pathway	17/708	219/8104	0.732254	0.955471	0.714785	2778/801/5499/387/805/808/1906/5595/481/8310/483/5880/476/3725/2353/10398/486	17
hsa04662	B cell receptor signaling pathway	6/708	82/8104	0.733096	0.955471	0.714785	118788/5595/5880/27071/3725/2353	6
hsa00240	Pyrimidine metabolism	4/708	56/8104	0.733129	0.955471	0.714785	5167/4907/4833/1503	4
hsa04923	Regulation of lipolysis in adipocytes	4/708	56/8104	0.733129	0.955471	0.714785	11343/2778/11145/57104	4
hsa00603	Glycosphingolipid biosynthesis - globo and isoglobo series	1/708	15/8104	0.746532	0.963586	0.720855	3074	1
hsa00730	Thiamine metabolism	1/708	15/8104	0.746532	0.963586	0.720855	204	1
hsa05224	Breast cancer	11/708	147/8104	0.748446	0.963586	0.720855	3479/1499/595/5595/1956/6464/3725/1026/2353/1647/3280	11
hsa04072	Phospholipase D signaling pathway	11/708	148/8104	0.7563	0.969772	0.725483	375/2778/387/8611/5595/183/5154/1956/185/6464/23533	11
hsa01523	Antifolate resistance	2/708	31/8104	0.767366	0.975436	0.729721	1244/2348	2
hsa05310	Asthma	2/708	31/8104	0.767366	0.975436	0.729721	3127/3123	2
hsa04370	VEGF signaling pathway	4/708	59/8104	0.76992	0.975436	0.729721	998/5595/5880/3315	4
hsa04061	Viral protein interaction with cytokine and cytokine receptor	7/708	100/8104	0.782175	0.978878	0.732296	4055/7852/8795/3572/5196/3561/6364	7
hsa04136	Autophagy - other	2/708	32/8104	0.78262	0.978878	0.732296	5515/23192	2
hsa00230	Purine metabolism	9/708	126/8104	0.782939	0.978878	0.732296	5236/9060/2987/204/5167/4907/4833/9061/2984	9
hsa04724	Glutamatergic synapse	8/708	114/8104	0.790289	0.978878	0.732296	2778/2783/2787/5595/2782/27165/2752/54407	8
hsa04916	Melanogenesis	7/708	101/8104	0.790779	0.978878	0.732296	2778/801/1499/805/808/1906/5595	7
hsa00514	Other types of O-glycan biosynthesis	3/708	47/8104	0.791106	0.978878	0.732296	6480/2589/11226	3
hsa04213	Longevity regulating pathway - multiple species	4/708	62/8104	0.802614	0.989269	0.740069	6647/3479/847/6648	4
hsa04064	NF-kappa B signaling pathway	7/708	104/8104	0.815053	1	0.748097	3929/929/7329/4055/598/1647/3383	7
hsa04935	Growth hormone synthesis, secretion and action	8/708	119/8104	0.827588	1	0.748097	2778/3479/5595/6464/3726/2353/2767/5606	8
hsa00532	Glycosaminoglycan biosynthesis - chondroitin sulfate / dermatan sulfate	1/708	20/8104	0.839685	1	0.748097	79586	1
hsa01250	Biosynthesis of nucleotide sugars	2/708	37/8104	0.846372	1	0.748097	5236/7358	2
hsa05226	Gastric cancer	10/708	149/8104	0.849652	1	0.748097	1499/595/5595/3728/1956/6464/83998/1015/1026/1647	10
hsa05320	Autoimmune thyroid disease	3/708	53/8104	0.853765	1	0.748097	3127/3106/3123	3
hsa04062	Chemokine signaling pathway	13/708	192/8104	0.867778	1	0.748097	998/387/2783/7852/2787/5595/2782/6464/5880/23533/5196/58191/6364	13
hsa04110	Cell cycle	8/708	126/8104	0.870882	1	0.748097	7534/595/2810/1029/10971/7529/1026/1647	8
hsa04917	Prolactin signaling pathway	4/708	70/8104	0.871653	1	0.748097	595/5595/6464/2353	4
hsa04725	Cholinergic synapse	7/708	113/8104	0.874865	1	0.748097	2783/2787/5595/2782/23533/2353/2767	7
hsa04141	Protein processing in endoplasmic reticulum	11/708	171/8104	0.892045	1	0.748097	10134/823/824/5034/6184/23193/6238/22872/3320/1650/4780	11
hsa05235	PD-L1 expression and PD-1 checkpoint pathway in cancer	5/708	89/8104	0.8988	1	0.748097	5595/1956/3725/2353/5606	5
hsa04620	Toll-like receptor signaling pathway	6/708	104/8104	0.90154	1	0.748097	3929/929/5595/3725/2353/5606	6
hsa04625	C-type lectin receptor signaling pathway	6/708	104/8104	0.90154	1	0.748097	801/387/805/808/5595/3725	6
hsa04020	Calcium signaling pathway	16/708	240/8104	0.901707	1	0.748097	2778/801/7417/805/808/887/7416/7852/2264/5154/2066/1956/185/2767/2321/444	16
hsa00563	Glycosylphosphatidylinositol (GPI)-anchor biosynthesis	1/708	26/8104	0.907517	1	0.748097	51604	1
hsa05032	Morphine addiction	5/708	91/8104	0.909023	1	0.748097	2778/2783/2787/2782/2562	5
hsa05161	Hepatitis B	10/708	162/8104	0.910155	1	0.748097	7534/537/5595/10971/7529/3725/1026/2353/6554/5606	10
hsa05206	MicroRNAs in cancer	21/708	310/8104	0.915545	1	0.748097	387/3190/7329/3925/7168/6624/6659/7057/595/5595/1029/10642/5154/6768/1956/6464/4082/7430/1026/90427/27165	21
hsa03050	Proteasome	2/708	46/8104	0.919982	1	0.748097	5693/5690	2
hsa04930	Type II diabetes mellitus	2/708	46/8104	0.919982	1	0.748097	5595/5315	2
hsa05217	Basal cell carcinoma	3/708	63/8104	0.922196	1	0.748097	1499/1026/1647	3
hsa04929	GnRH secretion	3/708	64/8104	0.927112	1	0.748097	5595/2767/3783	3
hsa04392	Hippo signaling pathway - multiple species	1/708	29/8104	0.929767	1	0.748097	55233	1
hsa04150	mTOR signaling pathway	9/708	155/8104	0.933418	1	0.748097	6194/9296/3479/387/9550/55004/5595/6520/529	9
hsa03015	mRNA surveillance pathway	5/708	97/8104	0.93446	1	0.748097	5499/9939/26986/5515/2521	5
hsa04380	Osteoclast differentiation	7/708	128/8104	0.938657	1	0.748097	1535/8878/5595/3727/3726/3725/2353	7
hsa05164	Influenza A	10/708	171/8104	0.938802	1	0.748097	60/71/7416/5595/8795/3127/3123/5340/3383/8766	10
hsa04550	Signaling pathways regulating pluripotency of stem cells	8/708	143/8104	0.940087	1	0.748097	3479/1499/5595/2264/6926/3397/4093/3572	8
hsa04664	Fc epsilon RI signaling pathway	3/708	68/8104	0.944052	1	0.748097	5595/5880/5606	3
hsa04215	Apoptosis - multiple species	1/708	32/8104	0.94667	1	0.748097	598	1
hsa03410	Base excision repair	1/708	33/8104	0.951348	1	0.748097	3146	1
hsa04130	SNARE interactions in vesicular transport	1/708	33/8104	0.951348	1	0.748097	8673	1
hsa04630	JAK-STAT signaling pathway	9/708	162/8104	0.951745	1	0.748097	316/595/5154/1956/598/3953/1026/3572/3561	9
hsa04071	Sphingolipid signaling pathway	6/708	119/8104	0.954904	1	0.748097	387/3827/5595/1509/5880/5515	6
hsa04660	T cell receptor signaling pathway	5/708	104/8104	0.955955	1	0.748097	998/387/5595/3725/2353	5
hsa04340	Hedgehog signaling pathway	2/708	56/8104	0.96242	1	0.748097	595/57758	2
hsa03013	Nucleocytoplasmic transport	5/708	108/8104	0.965134	1	0.748097	1915/7341/5901/7329/9939	5
hsa04931	Insulin resistance	5/708	108/8104	0.965134	1	0.748097	5499/2538/183/5105/5836	5
hsa04621	NOD-like receptor signaling pathway	10/708	184/8104	0.966097	1	0.748097	387/7417/7295/7416/1535/5595/1508/598/3725/3320	10
hsa05340	Primary immunodeficiency	1/708	38/8104	0.969261	1	0.748097	3561	1
hsa05169	Epstein-Barr virus infection	11/708	202/8104	0.971187	1	0.748097	567/595/3127/3725/3106/1026/3123/1647/3383/3280/5606	11
hsa05033	Nicotine addiction	1/708	40/8104	0.974421	1	0.748097	2562	1
hsa04650	Natural killer cell mediated cytotoxicity	6/708	131/8104	0.976962	1	0.748097	5595/6464/8795/5880/3106/3383	6
hsa04623	Cytosolic DNA-sensing pathway	2/708	63/8104	0.978182	1	0.748097	5441/5434	2
hsa04310	Wnt signaling pathway	8/708	166/8104	0.981304	1	0.748097	387/5176/1499/595/5880/3725/6422/22943	8
hsa04914	Progesterone-mediated oocyte maturation	4/708	102/8104	0.981916	1	0.748097	3479/5595/3835/3320	4
hsa05162	Measles	6/708	139/8104	0.985568	1	0.748097	10399/595/598/3725/2353/3561	6
hsa04211	Longevity regulating pathway	3/708	89/8104	0.987058	1	0.748097	3479/847/6648	3
hsa04120	Ubiquitin mediated proteolysis	6/708	142/8104	0.987935	1	0.748097	6233/7329/6923/10477/7316/9246	6
hsa04070	Phosphatidylinositol signaling system	3/708	97/8104	0.992785	1	0.748097	801/805/808	3
hsa03460	Fanconi anemia pathway	1/708	54/8104	0.992942	1	0.748097	3280	1
hsa04330	Notch signaling pathway	1/708	59/8104	0.995546	1	0.748097	3280	1
hsa00562	Inositol phosphate metabolism	1/708	73/8104	0.998775	1	0.748097	7167	1
hsa04060	Cytokine-cytokine receptor interaction	13/708	295/8104	0.998784	1	0.748097	4055/7852/3556/8795/3953/3572/51330/5196/58191/3561/27242/9235/6364	13
hsa05017	Spinocerebellar ataxia	4/708	143/8104	0.99897	1	0.748097	7417/5693/7416/5690	4
hsa03008	Ribosome biogenesis in eukaryotes	2/708	109/8104	0.999492	1	0.748097	5901/10171	2
hsa04080	Neuroactive ligand-receptor interaction	12/708	350/8104	0.999982	1	0.748097	718/3827/887/1906/727/183/185/3953/5340/2150/2562/100506013	12
hsa05168	Herpes simplex virus 1 infection	10/708	495/8104	1	1	0.748097	567/718/5499/684/727/6426/598/3127/3106/3123	10
hsa04740	Olfactory transduction	4/708	441/8104	1	1	0.748097	801/805/808/2782	4
